# Supplementary material for: CRISPR/Cas9 model of prostate cancer identifies Kmt2c deficiency as a metastatic driver by Odam/Cabs1 gene cluster expression
Source: Research Square preprint supplement (doi:10.21203/rs.3.rs-3013972/v1), 2024-01-15
Supplement: Supplementary file 1 [file Supplementary Table 1 Primers.list.xlsx]

## Sheet: Primer list
Primers used for qRT-PCR
Genes
Human	Forward primer	Reverse primer	Note
RPL4	ACGATACGCCATCTGTTCTGCC	GGAGCAAAACAGCTTCCTTGGTC
CABS1	AGCCAGCTAGCCTTAACATCT	AGCAAAGTGAAAACAGACCCA
CSN3	TGGCTGTGGAGGTTCAAAAC	AGCTGGTCTACGTTGGTACA
AMTN	CCATTAACACAGATGCTCACACT	TTGTACATTCAACCCTCCCAG
SMR3A	TGACTTGGATCTTGGGCCTT	AAACATGGTGGAGGAGGAGG
Mouse	Forward primer	Reverse primer	Note
Rpl4	GCCGCTGGTGGTTGAAGATAA	CGTCGGTTTCTCATTTTGCCC
Rpl32	TATGACCCCTATCACTCCTG	TTCTTCACTCTTGGCTCCTGT
Thy1	CCTTACCCTAGCCAACTTCACCAC	AGGATGTGTTCTGAACCAGC
Cdh11	CAATATCGTTGATGGAGACGGC	ACATTGGCGGCCTCTATCTT
Ncam1	CACTTTGTGTTCAGGACCTCAG	AAAAGCAATGAGACCAAGGTG
Cdh2	ATCACTACTATTGCCGTTTTGG	CTCCGCCTCTTGAGGTAACA
Snai1	CTTGTGTCTGCACGACCTGT	CTTCACATCCGAGTGGGTTT
Prrx1	GTCACCTGCTAGACCTGGAG	GTTGTCCTGTTTCTCCGCTG
Cenpf	GAGCTCCAGGTCTTTGCTTG	TTGGTCAGTGTCCTGCTTTG
Top2a	CAAGCGAGAAGTGAAGGTTGCC	GCTACCCACAAAATTCTGCGCC
Hist1h1c	CTACTGCCACGGAGAAACCT	GAAGAAACTGCCTGCACGATG
Hist2h3c	TTTCAAGTCGCTGTCTCCG	GAAGACACCCAAACGAGGAG
Snai1	CTTGTGTCTGCACGACCTGT	CTTCACATCCGAGTGGGTTT
Col6a2	TACCTCAATTCCTTTTCTCA	CTGATCTTAGTAAGCACATCC
Col6a3	GCAATGCATGAGACCCTCTG	ACTCAAGGCCCTTCTGACTC
Fn1	GTGACACTTATGAGCGCCCTA	CCACTTGTCGCCAATCTTGTA
Sca1 (Ly6a)	GTCCCATTTGAGACTTCTTGCC	AGGAGGGCAGATGGGTAAGC
AAV ITR	GGAACCCCTAGTGATGGAGTT	CGGCCTCAGTGAGCGA
Primers used for PCR
Genes
Human	Forward primer	Reverse primer	Note
KMT2C	CTGTTATTTCTGCTTCCTTGTCA	CATGAGGCCAAAGATGCTGT
KMT2D	AGCTTGTTTGAGGGCACATG	TCACCTATGCAATCCCCTGG
Mouse	Forward primer	Reverse primer	Note
Pten	CTCCCTGGAGTGAAGAGCAC	GTGTGCCTAGCACCTACTCC
Rb1	TAGGGCCTGGGTTGCTTCTA	TTGGCAACTGCTCACACACT
Tp53	ATAGAGACGCTGAGTCCGGT	CAAAGAGCGTTGGGCATGTG
Stk11	TGGGCATGGACACCTTCATC	GAGGTGACGCTCAGGGATAGA
Rnasel	TCAGAGGTTTCAGCTCAGGC	TTCTCGGCCCTGACAGTAGA
Kmt2c	TTGACTTCACTTTCCCCAGGT	AGAGGAAGGAGAGTTGTGTGAA
Kmt2d	CCTTGGTTCTGTGGCAAGAGT	GGAAAAGACGAGATGCCTCA
Zbtb16	AATCAGATGCGACTGGCTGG	TCGCTGGAATGCTTCGAGAT
Primers used for construct cloning
4g-test	TCGGGTTTATTACAGGGACAGCAG	TCTAAGGCCGAGTCTTATGAGCAG
Turn_Pten F	taagttatgtaacggGTACCCCTAGGcaCGCGTgagggcct
Turn_Pten R	taggggttcctgcggccgcaCGCGTTAGGAAAAAAgcaccgactcggtg
XmaJI_7sk F	AAGCCTAGGctgcagtatttagcat		5g
EcoRI_mU6 R	CCGGAATTCgatccgacgccgccat
EcoRI_7sk F	CCGGAATTCCTGCAGTATTTAGCATGC		8g
HindIII_mU6 R	CCCAAGCTTGATCCGACGCCGCCAT
BglII_mU6 F	CACAGATCTgatccgacgccgccat		5g+Kmt2c
HindIII_Scaffold R	CCCAAGCTTAAAAAAAGCACCGACTCGGTG
EcoRI_hU6 F	CCGGAATTCgagggcctatttccca		5g+Kmt2d
HindIII_7sk F	CCCAAGCTTctgcagtatttagcatgc		5g+Zbtb16
EcoRI_Scaffold R	CCGGAATTCgAAAAAAAGCACCGACTCGGTG
Protospacers used for Cas9 targets
Oligos' Name	guide RNA (protospacer)
NonTargeting.1	GCGACCAATACGCGAACGTC
NonTargeting.2	GGAGCGCACCATCTTCTTCA
Mouse	guide RNA (protospacer)
Pten	GCTTTACAGTGAATTGCTGC
Rb1	AGCATTATCAACCTTGGTAC
Tp53	GTGTAATAGCTCCTGCATGG
Stk11	ACTCCGAGACCTTATGCCGC
Rnasel	GTGGACGGCTGGTTCTCTACG
Kmt2c	GAGATAGATCCCTTACATCC
Kmt2d	GGGGCGACTCCTCAGTTGGT
Zbtb16	GATCCTGGAGTACGCCTACA
Human	Synthego guide RNA
KMT2C	G*C*C*GAGGAUGAACUAAGUAG
KMT2D	U*G*A*UUGGCCCCGGUGUCCAG
