# Supplementary material for: CRISPR/Cas9 model of prostate cancer identifies Kmt2c deficiency as a metastatic driver by Odam/Cabs1 gene cluster expression
Source: Research Square preprint supplement (doi:10.21203/rs.3.rs-3013972/v1), 2024-01-15
Supplement: Supplementary file 6 [file Supplementary Table 2 Pridicted.off.target.loci.xlsx]

## Sheet: Sheet1
Gene	Location	n (mismatches)	CRISPR on-/off- target sequence	Genomic annotation
Kmt2c	chr5:25580906	0	GAGATAGATCCCTTACATCCAGG
	chr1:25922811	3	CCTGGATGTAAtaGATCTtTCTC	intergenic:Gm9884-4931408C20Rik
	chr11:119754387	2	GAGATAGATCCCTTACAgCtTGG	intron:Rptor
	chr16:50384442	3	CCTGGATGcAAtGGATCTATtTC	intergenic:G730013B05Rik-Ccdc54/4930542D17Rik
	chr6:68284931	3	GAGATAGAaaCCTTcCATCCAGG	intergenic:4930515G16Rik-Rprl1
	chr9:119898522	3	GAGATAGgTCCCacACATCCTGG	intergenic:Cx3cr1-Ccr8
Kmt2d	chr15:98761923	0	GGGGCGACTCCTCAGTTGGTGGG
	chr11:26559116	3	CCCACCAgCTGAGGgGTCtCCCC	intergenic:Vrk2-Gm12070
	chr15:98761416	3	GGGGaGAtTCCTCAGgTGGTGGG	exon:Kmt2d
	chr5:144842287	3	CCCACCAACTGgGaAGTgGCCCC	intron:Smurf1
	chr6:92048854	3	GGGGCtACagCTCAGTTGGTAGG	intron:Fgd5
Stk11	chr10:79952654	0	ACTCCGAGACCTTATGCCGCAGG
	chr11:46975944	3	ACTCtGAGACCTTAgGCCcCAGG	intron:Sgcd
Pten	chr19:32777365	0	GCAGCAATTCACTGTAAAGCTGG
	chr1:38406202	3	GCAGCAATTCACTGTtctGCAGG	intron:Aff3
	chr13:46175966	2	GCAGCAAcTCACTGTAAAGtGGG	intergenic:5033430I15Rik-Stmnd1
	chr18:34240776	2	GCAGCAATTCACTGTgAgGCTGG	intergenic:Epb41l4a-Gm10548
	chr7:56038412	3	GtgGCAATTCACTcTAAAGCAGG	intron:Oca2
	chr8:55055392	3	GgAaCAATTCACTGTAAgGCTGG	exon:Spata4
	chr9:96480665	3	CCTGCcTTACAGTacATTGCTGC	intron:Rasa2
Rnasel	chr1:153634134	0	TGGACGGCTGGTTCTCTACGTGG
	chr1:52611598	3	CCCCGcAGAGAACCAGCtGTaCA	exon:Gm28178/Gm53065
	chr15:78157332	3	CCACGTAGAGAtCCAGgtGTCCA	intergenic:Ncf4-Csf2rb2/Mir7676-2/Mir7676-1
	chr17:11510904	3	TGGACGGCTGGTTaTaTAaGTGG	intron:Prkn
	chr19:4353773	3	CCACGTAGgGAACCtGCCtTCCA	intron:Grk2
	chr19:44749881	3	CCACGTgGAaAACCAGCCtTCCA	intron:Pax2
	chr4:154751109	3	CCACGTAGAGAACCAGCgGTCgg	exon:Actrt2
Trp53	chr11:69480005	0	GTGTAATAGCTCCTGCATGGGGG
	chr1:42438596	3	GTGTAATAtCTCCTGgAaGGTGG	intergenic:Gm39631-Pantr1
	chr1:77150661	3	GTGTAcTAGCTgaTGCATGGCGG	intergenic:Mir6343-Epha4
	chr11:52677396	3	aTGTAtTAGtTCCTGCATGGAGG	intron:Fstl4
	chr14:57204326	3	GTGTAATAcCaCCTGCAaGGTGG	intergenic:Zmym2-B020004C17Rik
	chr16:27791917	2	CCTCtATGCAGGAGtTATTACAC	intergenic:Gm10823-Fgf12
	chr17:7261007	3	GTGTAAaAGCTaCTGCAaGGTGG	intron:Rnaset2b
	chr17:8351918	3	CCACCtTGCAGtAGCTtTTACAC	intron:Rnaset2b/Rnaset2a
	chr17:54727395	2	GTGTAgTAGCTCtTGCATGGGGG	intergenic:1700025K24Rik-St6gal2
	chr19:50187511	3	GTGTtATtGCTaCTGCATGGTGG	intron:Sorcs1
	chr2:91804424	2	GTGgAAcAGCTCCTGCATGGGGG	intergenic:Dgkz-Creb3l1
	chr2:94264097	3	CCTCCATGCAGGAGacAaTACAC	intron:Api5
	chr3:98252436	3	GTGTAtgAGCaCCTGCATGGTGG	intergenic:Phgdh-Zfp697
	chr8:48611520	3	tTGTcATAtCTCCTGCATGGAGG	intergenic:Dctd-Tenm3
	chr8:111477985	3	CCTCCATGCAGGtGCTgTgACAC	intron:Il34
Rb1	chr14:73532410-32	0	AGCATTATCAACCTTGGTACTGG
	chr1:107323362	3	AGCATTtTCAACaTTGGTgCTGG	intergenic:Serpinb11-Serpinb7
	chr10:129090541	3	AtCATTATCAtCCTTGGTAtGGG	intergenic:Olfr775-Olfr776
	chr16:94574462	3	CCAGTAtCAtGGTTGATAATGCa	intron:Kcnj6
	chr2:160344297	3	CCAGTtCaAAGGaTGATAATGCT	intergenic:Mafb-LOC115489488
	chr5:98763842	3	AGtcTTATCAtCCTTGGTACTGG	intron:Cfap299
	chr6:111936545	3	AGCATTtTCAACaaTGGTACTGG	intergenic:Grm7-1700054K19Rik
	chr7:106269926	3	CCAGTAtCAAtGTTGAaAATGCT	intergenic:Gm1966-Olfr693
	chr8:124351247	3	AGCATgcTCcACCTTGGTACAGG	intergenic:n-R5s136-Rhou
Zbtb16	chr9:48744043	0	GATCCTGGAGTACGCCTACACGG
	chr16:51872840	3	CCATGTAGGgaTAgTCCAGGATC	intron:Cblb
	chr9:44240289	3	GATCCTGtAcTACGtCTACATGG	exon:Dpagt1
	chrX:8789796	3	CCATGTAGGCGTtgTCCAGGcTC	intergenic:B630019K06Rik-Fthl17b
Chd1	chr17:15945565-87	0	TCTGGATCTGGCTCGAGTTCTGG
	chr4:43177304	1	TCTGGcTCTGGCTCGAGTTCAAG	exon:Unc13b
	chr2:76653259	3	TCTGGcTCTGGtTCcAGTTCGGG	exon:Ttn
	chr2:122951835	3	TCTGGtTCTGGCTCtgGTTCTGG	intergenic:Sqor-Sema6d
	chr4:38471720	3	TgTGGATCTGGCTgGAGTgCAGG	intergenic:Gm12374-Gm12381
	chr6:121473635	3	TCTGGATCTGGtTCtgGTTCTGG	intergenic:Iqsec3-A2m
	chr7:28800187	3	CCAGAgCTaGAGtCAGATCCAGA	intron:Ryr1
	chr8:106006323	3	CCGGAACcCGAGCCcGAgCCAGA	exon:Nol3
	chr9:57986241	3	CCAGAACcaGAGCCAGAcCCAGA	intron:Ccdc33
	chr9:107872810	3	cCTGGATtTGGCTCGcGTTCAGG	exon:Cdhr4
	chrX:55231007	3	TCTGGtTCTGaCTtGAGTTCTGG	intergenic:3830403N18Rik-Gm773
	chrX:55266608	3	CCAGAACTCaAGtCAGAaCCAGA	intergenic:Gm773-1600025M17Rik
	chrX:71313530	3	TCTGGcTCTGGCTCGgGcTCCGG	exon:Gabre
	chrX:100955321	3	aCTcGATCTGGCTCGAGTTaTGG	intergenic:Nhsl2-Rtl5
	chrX:134577157	3	CCAGAACTaGAGCCAGAgCCAGg	intron:Tcp11x2
	chr10:62330790	3	TCcGGcTCTGGCTCGgGTTCCGG	exon:Srgn

## Sheet: Trp53_off-target
X.1	X	chr	start	stop	ref	alt	func.refgene	gene	genedetail.refgene	exonicfunc.refgene	aachange.refgene	key	is.indel	chrom	dbsnp	var	filter	sampleid	var_count	ref_count	mousekey	snp_flag
992983	992983	chr16	27791923	27791927	TGCAG	T	intergenic	Gm10823;Fgf12	dist=47043;dist=184608	NA	NA	chr16:27791923:TGCAG:	TRUE	CM001009.3	NA	T	PASS	9g3	5	35	chr16_27791923_27791927_TGCAG_T	unique
987126	987126	chr16	27791907	27791943	CAGTTCATGCCCTCTATGCAGGAGTTATTACACATAG	C	intergenic	Gm10823;Fgf12	dist=47027;dist=184592	NA	NA	chr16:27791907:CAGTTCATGCCCTCTATGCAGGAGTTATTACACATAG:	TRUE	CM001009.3	NA	C	PASS	9g5	3	31	chr16_27791907_27791943_CAGTTCATGCCCTCTATGCAGGAGTTATTACACATAG_C	unique
987127	987127	chr16	27791913	27791946	ATGCCCTCTATGCAGGAGTTATTACACATAGAGT	A	intergenic	Gm10823;Fgf12	dist=47033;dist=184589	NA	NA	chr16:27791913:ATGCCCTCTATGCAGGAGTTATTACACATAGAGT:	TRUE	CM001009.3	NA	A	PASS	9g5	5	27	chr16_27791913_27791946_ATGCCCTCTATGCAGGAGTTATTACACATAGAGT_A	unique
1091499	1091499	chr16	27791912	27791921	CATGCCCTCT	C	intergenic	Gm10823;Fgf12	dist=47032;dist=184614	NA	NA	chr16:27791912:CATGCCCTCT:	TRUE	CM001009.3	NA	C	PASS	9g6	4	44	chr16_27791912_27791921_CATGCCCTCT_C	unique
1091500	1091500	chr16	27791921	27791927	TATGCAG	T	intergenic	Gm10823;Fgf12	dist=47041;dist=184608	NA	NA	chr16:27791921:TATGCAG:	TRUE	CM001009.3	NA	T	PASS	9g6	9	36	chr16_27791921_27791927_TATGCAG_T	unique
