# Supplementary material for: CRISPR/Cas9 model of prostate cancer identifies Kmt2c deficiency as a metastatic driver by Odam/Cabs1 gene cluster expression
Source: Research Square preprint supplement (doi:10.21203/rs.3.rs-3013972/v1), 2024-01-15
Supplement: Supplementary file 11 [file Supplementary Table 5 PCa.RNAseq.ge.sig.results.xlsx]

## Sheet: cai.PCa.RNAseq.ge.sig.results
GeneID	GeneSymbol	Length	PRKM_control	PRKM_5g	PRKM_9g	PRKM_metastasis	Log2FC_5gVScontrol	Padj_5gVScontrol	Log2FC_9gVScontrol	Padj_9gVScontrol	Log2FC_metastasisVScontrol	Padj_metastasisVScontrol	Log2FC_9gVS5g	Padj_9gVS5g	Log2FC_metastasisVS5g	Padj_metastasisVS5g	Log2FC_metastasisVS9g	Padj_metastasisVS9g
ENSMUSG00000025902.13	Sox17	4772	0.963257	1.49909	14.3384	20.8921	0.642848	0.596325	3.90903	3.24873e-05	4.45224	1.30637e-06	3.26618	0.0105635	3.80939	2.91365e-05	0.543208	0.729035
ENSMUSG00000002459.17	Rgs20	4239	0.0532705	0.0637946	0.501268	1.00444	0.299177	0.873254	3.5091	0.00815949	4.52413	0.000363877	3.20993	0.0929158	4.22495	0.000460076	1.01503	0.562807
ENSMUSG00000051285.17	Pcmtd1	6654	20.5168	9.68415	8.26957	9.22117	-1.08348	1.27056e-08	-1.31209	2.72704e-12	-1.1551	6.96766e-10	-0.228606	0.594173	-0.0716206	0.79071	0.156986	0.599842
ENSMUSG00000061024.8	Rrs1	2048	11.1093	13.2319	18.3272	22.5855	0.252767	0.256696	0.725289	0.000153026	1.02504	2.62472e-08	0.472522	0.118293	0.772269	2.04008e-05	0.299747	0.202949
ENSMUSG00000025911.14	Adhfe1	3780	10.2574	1.09525	0.699598	0.673544	-3.24023	5.0578e-09	-3.90604	1.15616e-12	-3.95286	3.96812e-13	-0.665812	0.59989	-0.712638	0.289825	-0.0468261	0.970427
ENSMUSG00000025915.14	Sgk3	14311	0.991	2.01393	2.84682	3.28758	1.02554	0.000139826	1.52629	3.91259e-09	1.73374	1.11763e-11	0.500746	0.312925	0.708196	0.00830477	0.20745	0.605211
ENSMUSG00000099032.2	Tcf24	4193	0.822585	0.895571	0.916711	2.40878	0.127312	0.834002	0.161171	0.779074	1.56185	0.000241559	0.033859	0.981055	1.43454	0.000606717	1.40068	0.00125974
ENSMUSG00000048960.13	Prex2	16609	1.47427	1.95424	1.4601	7.92627	0.407122	0.538396	-0.0143322	0.986667	2.42875	2.09394e-06	-0.421454	0.744809	2.02163	7.56885e-05	2.44308	1.48396e-06
ENSMUSG00000016918.15	Sulf1	11294	6.49607	39.6034	30.9469	4.87763	2.60872	1.22735e-09	2.25277	1.78471e-07	-0.413522	0.404313	-0.355945	0.740604	-3.02224	4.07105e-14	-2.66629	7.10729e-11
ENSMUSG00000025938.16	Slco5a1	13137	0.10104	2.1086	1.62586	0.758683	4.42609	4.68441e-33	4.04957	9.74177e-28	2.94782	3.87993e-15	-0.376523	0.615701	-1.47827	6.13193e-06	-1.10175	0.00186858
ENSMUSG00000025935.10	Tram1	3162	139.598	60.4881	59.6506	64.3716	-1.20677	5.54648e-10	-1.22668	2.3052e-10	-1.11711	6.84377e-09	-0.0199061	0.975768	0.0896542	0.740373	0.10956	0.745664
ENSMUSG00000025932.14	Eya1	7808	2.0028	1.21981	0.561531	0.174705	-0.718608	0.382715	-1.845	0.00973941	-3.55998	1.29323e-07	-1.12639	0.415171	-2.84137	2.53403e-05	-1.71498	0.0280456
ENSMUSG00000032719.4	Sbspon	2748	5.75533	7.49236	4.15847	0.247724	0.381006	0.640031	-0.470986	0.53911	-4.61298	1.4971e-13	-0.851992	0.520515	-4.99398	3.03577e-17	-4.14199	1.02573e-11
ENSMUSG00000025921.7	Rdh10	4160	20.274	18.0297	24.9203	36.2369	-0.169373	0.709454	0.298167	0.464453	0.83823	0.016284	0.46754	0.517573	1.0076	0.00347382	0.540063	0.209372
ENSMUSG00000042686.5	Jph1	4998	0.980233	0.844183	1.04873	0.457334	-0.219189	0.616742	0.0999371	0.8267	-1.11314	0.00126028	0.319126	0.681715	-0.893956	0.0113538	-1.21308	0.000463728
ENSMUSG00000067780.3	Pi15	6923	1.56178	1.85198	0.858514	5.98787	0.24628	0.843394	-0.86819	0.407139	1.94315	0.034317	-1.11447	0.559872	1.69687	0.0775643	2.81134	0.00236944
ENSMUSG00000025927.13	Tfap2b	6338	3.16616	0.0932115	0.0820558	0.00680816	-5.19348	0.0120476	-5.39282	0.00810092	-11.5663	1.16712e-07	-0.19934	0.975441	-6.37283	0.00700755	-6.17349	0.0143456
ENSMUSG00000043760.16	Pkhd1	14310	4.21947	0.789432	0.255381	0.206036	-2.42238	0.0150406	-4.06617	1.45281e-05	-4.37693	2.04239e-06	-1.64378	0.375335	-1.95455	0.0540686	-0.310767	0.862377
ENSMUSG00000041859.10	Mcm3	3752	1.90048	16.4479	23.0395	26.3537	3.12206	2.05343e-21	3.60917	1.86495e-28	3.8027	9.14126e-32	0.487104	0.486642	0.680634	0.0585073	0.19353	0.729153
ENSMUSG00000025931.15	Paqr8	5488	1.23399	3.32546	2.41122	7.82888	1.43617	0.00201861	0.971284	0.0444855	2.67272	7.60399e-10	-0.46489	0.646592	1.23655	0.00649748	1.70144	0.00014524
ENSMUSG00000041779.5	Tram2	6661	2.37577	11.0758	9.06816	6.12641	2.22353	8.17447e-18	1.93469	1.01376e-13	1.36924	1.89394e-07	-0.288839	0.626208	-0.85429	0.00130484	-0.565451	0.0667062
ENSMUSG00000025934.15	Gsta3	4344	9.10076	1.19485	0.335703	3.92956	-2.93899	0.00031961	-4.80694	1.17161e-09	-1.21357	0.159586	-1.86795	0.181898	1.72542	0.0447286	3.59337	6.69749e-06
ENSMUSG00000028033.16	Kcnq5	7689	1.81696	0.121589	0.111198	0.601157	-3.96699	3.13926e-08	-4.09666	9.68036e-09	-1.60441	0.0298434	-0.129672	0.956088	2.36258	0.00134264	2.49225	0.00103747
ENSMUSG00000026155.13	Smap1	3575	10.6896	17.3369	17.4217	22.0472	0.698067	0.00791312	0.705481	0.0065817	1.04481	2.21994e-05	0.00741428	0.994558	0.346738	0.224503	0.339324	0.306019
ENSMUSG00000026153.15	Fam135a	7773	3.96904	6.66699	6.68571	8.52827	0.749231	0.00276022	0.754331	0.00235114	1.10458	2.96543e-06	0.00509998	0.99596	0.355348	0.191934	0.350248	0.262202
ENSMUSG00000026064.16	Ptp4a1	5541	5.53416	12.6333	13.9498	15.4282	1.19215	1.38234e-08	1.33592	1.2511e-10	1.48079	5.07933e-13	0.14377	0.791282	0.288649	0.235038	0.144879	0.669085
ENSMUSG00000117310.2	Ptp4a1	4145	7.04322	16.1862	18.1096	20.0075	1.20184	2.26367e-08	1.36463	1.31057e-10	1.50794	6.41245e-13	0.16279	0.765366	0.306098	0.214644	0.143309	0.681163
ENSMUSG00000026134.11	Prim2	5938	1.19841	3.01161	3.45837	3.24798	1.33295	2.99262e-06	1.53576	4.5394e-08	1.44282	2.30234e-07	0.202815	0.773081	0.109879	0.773104	-0.0929361	0.857948
ENSMUSG00000037509.21	Arhgef4	9861	1.46158	1.98973	2.03827	3.70848	0.446086	0.485569	0.481085	0.431502	1.34546	0.0102783	0.0349996	0.983725	0.899373	0.111564	0.864373	0.174702
ENSMUSG00000026123.11	Plekhb2	7987	8.95001	15.5115	16.3382	24.1213	0.793819	0.0155209	0.868873	0.00671872	1.4308	2.20824e-06	0.0750535	0.935471	0.636985	0.0546061	0.561931	0.134852
ENSMUSG00000047180.8	Neurl3	3217	2.53844	12.996	9.9692	17.5058	2.36246	1.34646e-06	1.97921	6.07281e-05	2.79268	4.54383e-09	-0.383243	0.752524	0.430219	0.476982	0.813462	0.180874
ENSMUSG00000037447.16	Arid5a	12540	0.72903	2.88355	3.12753	4.46662	1.98871	1.0764e-08	2.1061	1.02351e-09	2.62096	1.01616e-14	0.117383	0.906105	0.632246	0.0973421	0.514863	0.253469
ENSMUSG00000037408.10	Cnnm4	4829	3.72249	11.7015	11.1781	12.4315	1.65455	7.93348e-13	1.58901	5.62386e-12	1.74173	2.24755e-14	-0.0655365	0.924109	0.0871831	0.78737	0.15272	0.688018
ENSMUSG00000026121.13	Sema4c	4593	5.68997	15.6384	17.1007	19.3782	1.45999	0.00040135	1.58954	9.26046e-05	1.76973	8.52488e-06	0.129543	0.910636	0.309735	0.545853	0.180191	0.801421
ENSMUSG00000026113.17	Inpp4a	10387	5.52953	3.08022	2.59829	3.06976	-0.844905	0.00180304	-1.09274	3.18022e-05	-0.849795	0.00126198	-0.247837	0.688854	-0.00488993	0.993304	0.242947	0.535073
ENSMUSG00000026110.15	Mgat4a	12881	4.47441	19.7666	17.1302	22.56	2.14419	1.80851e-07	1.93765	2.59513e-06	2.33491	6.94317e-09	-0.206541	0.8557	0.190725	0.734293	0.397266	0.516546
ENSMUSG00000026088.15	Mitd1	2770	3.01478	5.13004	7.31302	9.38563	0.770302	0.00161752	1.28544	2.68609e-08	1.64297	3.28338e-13	0.515138	0.191294	0.872666	8.48282e-05	0.357529	0.212148
ENSMUSG00000037138.18	Aff3	6654	1.27009	1.25603	0.61949	2.72822	-0.0168753	0.988342	-1.04629	0.0901926	1.10718	0.0603515	-1.02941	0.350147	1.12406	0.0630391	2.15347	0.000150656
ENSMUSG00000026074.15	Map4k4	9579	10.2801	30.4125	29.9932	27.7293	1.56523	1.80727e-11	1.54536	2.7792e-11	1.43205	5.99582e-10	-0.0198716	0.980365	-0.133183	0.673632	-0.113311	0.78802
ENSMUSG00000026073.13	Il1r2	1908	1.21505	5.73304	4.04769	14.3945	2.26096	1.61716e-05	1.75762	0.00101387	3.59327	7.56752e-13	-0.503342	0.669179	1.3323	0.0103903	1.83565	0.000352461
ENSMUSG00000026072.12	Il1r1	6363	5.94434	32.2239	16.2728	5.64242	2.43983	2.17433e-06	1.45371	0.00689342	-0.0751	0.912647	-0.986122	0.319078	-2.51493	3.17977e-07	-1.52881	0.00568776
ENSMUSG00000070942.8	Il1rl2	6812	2.53958	6.44481	4.46494	2.90163	1.34567	0.000574454	0.8148	0.0473295	0.19315	0.674905	-0.530868	0.510163	-1.15252	0.00282159	-0.62165	0.195174
ENSMUSG00000026069.15	Il1rl1	6894	0.275058	2.29376	0.743925	0.453244	3.08923	0.00184978	1.45602	0.177291	0.734997	0.510058	-1.63321	0.386582	-2.35423	0.0179249	-0.721026	0.630109
ENSMUSG00000026070.15	Il18r1	4817	1.74535	3.28733	1.95641	6.97636	0.917361	0.118457	0.165155	0.815734	2.00488	0.000108998	-0.752206	0.492001	1.08752	0.0507811	1.83973	0.00054777
ENSMUSG00000026068.11	Il18rap	6752	0.222616	3.18801	1.39407	3.29151	3.88063	7.88501e-22	2.6833	7.80464e-11	3.92797	1.36327e-22	-1.19733	0.02858	0.047335	0.936393	1.24467	0.00183248
ENSMUSG00000026065.8	Slc9a4	4562	0.594617	0.529922	0.148247	2.46477	-0.168099	0.856367	-2.08048	0.0027304	2.06922	0.00145598	-1.91238	0.0630963	2.23732	0.00044884	4.1497	2.5897e-11
ENSMUSG00000026062.12	Slc9a2	6984	13.3975	1.49046	1.03719	0.676274	-3.17349	2.20363e-05	-3.70121	4.99377e-07	-4.3186	2.37036e-09	-0.527713	0.782713	-1.14511	0.177457	-0.617396	0.591062
ENSMUSG00000045515.4	Pou3f3	7733	21.135	0.467849	0.302923	0.007893	-5.51457	0.0141471	-6.15137	0.00503989	-13.1263	1.32581e-08	-0.636795	0.917988	-7.61173	0.00185124	-6.97493	0.00749483
ENSMUSG00000008136.14	Fhl2	1897	6.29569	28.0365	23.283	18.7113	2.15882	1.11197e-16	1.89101	4.80988e-13	1.5747	1.87233e-09	-0.267802	0.65981	-0.584112	0.0378293	-0.316309	0.388425
ENSMUSG00000026051.8	Ecrg4	902	0.643025	20.4203	7.32046	0.215778	5.09958	5.96147e-10	3.61465	1.74996e-05	-1.8233	0.0608484	-1.48493	0.325484	-6.92288	5.073e-18	-5.43795	5.41351e-11
ENSMUSG00000057363.12	Uxs1	5097	4.01491	7.41722	7.65309	8.4243	0.886722	4.31869e-06	0.933385	1.05914e-06	1.07018	1.11924e-08	0.0466627	0.934154	0.183462	0.428016	0.136799	0.648826
ENSMUSG00000041763.14	Tpp2	10078	6.64773	10.603	11.9954	13.8418	0.673906	1.55175e-06	0.852507	5.31766e-10	1.0583	4.16444e-15	0.178601	0.552361	0.384389	0.00723725	0.205788	0.255547
ENSMUSG00000026047.13	Poglut2	3199	4.17055	7.57378	8.69886	5.93166	0.862545	2.17877e-05	1.06528	8.21377e-08	0.510871	0.0142085	0.202731	0.653232	-0.351674	0.105413	-0.554405	0.00896233
ENSMUSG00000026043.18	Col3a1	9816	57.7289	1504.99	1271.78	80.5932	4.70443	2.2543e-27	4.46152	9.26672e-25	0.481412	0.344974	-0.242907	0.844028	-4.22302	3.00396e-25	-3.98011	2.94441e-22
ENSMUSG00000026042.16	Col5a2	9591	6.4802	207.267	201.965	28.744	5.00039	5.00934e-32	4.96302	1.40338e-31	2.15008	9.15631e-07	-0.0373764	0.98036	-2.85031	4.55623e-12	-2.81294	1.34974e-11
ENSMUSG00000025993.10	Slc40a1	9000	0.874353	9.1306	4.90061	2.47593	3.39188	4.88528e-08	2.49278	8.49562e-05	1.50722	0.0208342	-0.899092	0.49588	-1.88465	0.00309142	-0.985562	0.219164
ENSMUSG00000041144.12	Dnah7b	19984	0.568542	1.04109	0.919946	0.405221	0.875361	0.10955	0.694876	0.208818	-0.490216	0.373371	-0.180485	0.896389	-1.36558	0.00634772	-1.18509	0.0306697
ENSMUSG00000025986.6	Slc39a10	6095	4.53203	8.49275	10.2385	15.2205	0.907107	0.000112425	1.17804	2.5727e-07	1.74964	3.09301e-15	0.270932	0.592767	0.842528	0.000191618	0.571596	0.0251736
ENSMUSG00000045954.7	Cavin2	3055	12.831	5.9927	4.03409	27.6548	-1.10018	0.163726	-1.67414	0.0224966	1.10879	0.135171	-0.573961	0.735849	2.20897	0.00153237	2.78293	6.05113e-05
ENSMUSG00000026107.11	Nabp1	8498	1.39772	5.50598	6.21748	15.3122	1.98181	4.62203e-09	2.15797	1.16855e-10	3.45827	2.83241e-26	0.176163	0.849489	1.47646	6.13193e-06	1.3003	0.000144318
ENSMUSG00000062939.11	Stat4	3872	0.121952	1.34892	1.15137	1.04332	3.59344	1.67502e-08	3.35808	1.40929e-07	3.21959	3.57212e-07	-0.23536	0.883257	-0.373853	0.602825	-0.138493	0.897686
ENSMUSG00000026104.14	Stat1	7105	5.27708	26.5306	53.3075	65.889	2.33123	4.06013e-07	3.33815	9.80383e-14	3.64377	2.36841e-16	1.00692	0.220122	1.31254	0.00569975	0.305624	0.68498
ENSMUSG00000002881.14	Nab1	4100	11.4987	23.0959	23.4964	34.5542	1.00676	0.000220691	1.03197	0.00013423	1.58811	9.25393e-10	0.0252136	0.97753	0.581346	0.0412844	0.556133	0.0753727
ENSMUSG00000043015.15	Nemp2	7078	0.563484	1.41904	1.39492	1.66328	1.34007	4.4667e-10	1.31943	7.19243e-10	1.56973	6.44659e-14	-0.0206359	0.974158	0.229661	0.319104	0.250297	0.345541
ENSMUSG00000026102.9	Inpp1	6460	11.0939	3.14215	2.89225	2.64043	-1.82207	2.70865e-26	-1.94005	1.04336e-29	-2.07583	3.61275e-34	-0.117979	0.804402	-0.253754	0.229247	-0.135775	0.639973
ENSMUSG00000041426.12	Hibch	6059	3.67738	1.77149	1.72361	1.92806	-1.05634	0.000252623	-1.09613	0.000126857	-0.936766	0.000982579	-0.0397834	0.964552	0.119578	0.759676	0.159361	0.740815
ENSMUSG00000043629.12	1700019D03Rik	4330	1.66433	0.419736	0.238363	0.103808	-2.01172	0.000139671	-2.88445	3.3866e-08	-4.1347	1.19555e-14	-0.872729	0.427815	-2.12298	0.00018557	-1.25025	0.0681755
ENSMUSG00000042807.15	Hecw2	12947	0.876274	0.798345	0.734587	1.88367	-0.134925	0.852724	-0.254439	0.700082	1.10712	0.0372211	-0.119514	0.938019	1.24204	0.0198667	1.36156	0.0147038
ENSMUSG00000052331.14	Ankrd44	14175	2.19394	4.92908	3.30805	5.90073	1.16887	0.00555853	0.592851	0.191567	1.42834	0.000385682	-0.576022	0.496405	0.259466	0.619209	0.835488	0.0763562
ENSMUSG00000025981.13	Coq10b	4805	3.00466	6.35728	6.83424	10.884	1.08443	5.05372e-09	1.19085	8.64275e-11	1.86113	1.55117e-25	0.10642	0.827023	0.776696	9.06221e-06	0.670276	0.000269552
ENSMUSG00000025980.14	Hspd1	2642	40.4602	50.6789	77.7137	89.05	0.324832	0.0517435	0.942333	2.3052e-10	1.13846	7.06125e-15	0.617501	0.00183255	0.813632	1.24042e-08	0.196131	0.341474
ENSMUSG00000025979.13	Mob4	4855	6.89445	8.89349	9.54741	14.7175	0.367758	0.129921	0.471122	0.0409219	1.0948	1.67086e-07	0.103364	0.86106	0.727046	0.000620072	0.623682	0.00618173
ENSMUSG00000025978.14	Rftn2	5871	0.749981	2.23888	2.15389	1.22248	1.58709	0.000100793	1.53234	0.000168076	0.711703	0.098561	-0.0547558	0.964552	-0.875389	0.0370156	-0.820633	0.075872
ENSMUSG00000038349.10	Plcl1	6687	2.09205	4.71492	3.86163	1.27105	1.17471	0.0533928	0.886285	0.153	-0.721318	0.238176	-0.288421	0.849462	-1.89602	0.000636026	-1.6076	0.00721352
ENSMUSG00000038331.15	Satb2	6788	0.353589	0.761764	1.18581	0.654189	1.11565	9.43359e-05	1.75761	9.77163e-11	0.897609	0.00163274	0.641969	0.10919	-0.218036	0.49486	-0.860006	0.000883612
ENSMUSG00000038305.15	Spats2l	8041	1.10631	4.91078	3.46528	2.30545	2.15542	5.4361e-10	1.65265	2.74212e-06	1.06393	0.00312796	-0.502765	0.492566	-1.09149	0.00195765	-0.588727	0.177374
ENSMUSG00000026039.9	Sgo2a	7007	0.595201	2.75076	4.32087	4.89321	2.21999	7.50386e-07	2.87404	5.64675e-11	3.05318	2.00342e-12	0.654052	0.475287	0.83319	0.0830067	0.179138	0.82228
ENSMUSG00000063558.4	Aox1	8690	3.70914	2.52864	1.46218	1.62603	-0.553569	0.335842	-1.34649	0.00728707	-1.19185	0.0163504	-0.792923	0.415859	-0.638277	0.254637	0.154646	0.86594
ENSMUSG00000064294.12	Aox3	7033	1.70315	1.03257	0.330553	3.06295	-0.72567	0.53446	-2.39052	0.0142119	0.84907	0.417087	-1.66485	0.360427	1.57474	0.125707	3.23959	0.00067969
ENSMUSG00000051223.14	Bzw1	4033	28.829	63.8175	70.4389	95.973	1.14676	2.65311e-05	1.28933	1.66698e-06	1.73547	3.51797e-11	0.142575	0.847	0.58871	0.0422697	0.446135	0.190853
ENSMUSG00000026029.14	Casp8	2893	7.95974	28.7265	37.4402	44.6296	1.85382	2.48147e-12	2.23659	1.10123e-17	2.48966	6.72943e-22	0.382771	0.499775	0.635846	0.024826	0.253075	0.525176
ENSMUSG00000047361.16	Gm973	5484	2.93586	0.221643	0.122768	0.26532	-3.77591	1.67157e-05	-4.69425	6.98794e-08	-3.50806	4.7068e-05	-0.91834	0.65906	0.267855	0.831115	1.18619	0.328478
ENSMUSG00000026020.9	Nop58	10758	3.70872	5.27096	7.19477	8.05185	0.507152	0.000157001	0.957954	5.20619e-14	1.11941	4.79848e-19	0.450802	0.0105635	0.61226	6.36915e-07	0.161459	0.358812
ENSMUSG00000067336.6	Bmpr2	17983	12.0059	17.2565	16.5143	26.4971	0.523495	0.0441103	0.460061	0.0769205	1.14227	1.05132e-06	-0.0634349	0.929826	0.618779	0.0126218	0.682214	0.00808664
ENSMUSG00000026782.15	Abi2	8543	8.99541	5.29123	4.57512	3.55099	-0.766536	3.92975e-05	-0.977574	8.39974e-08	-1.34122	5.32705e-14	-0.211038	0.606593	-0.574685	0.00228005	-0.363647	0.103526
ENSMUSG00000026014.15	Raph1	20498	2.49496	8.45139	6.7028	7.4507	1.76129	7.85832e-17	1.42623	2.1967e-11	1.5794	6.5132e-14	-0.335054	0.449749	-0.181883	0.506269	0.153171	0.66064
ENSMUSG00000052062.14	Pard3b	13153	3.23696	1.81528	1.51171	1.35228	-0.835471	0.139134	-1.10057	0.039459	-1.26072	0.0139981	-0.265099	0.84538	-0.425251	0.497151	-0.160152	0.865863
ENSMUSG00000025969.15	Nrp2	11842	5.94258	16.4435	12.9872	9.51002	1.46892	0.000198353	1.12848	0.00507813	0.678873	0.100899	-0.340434	0.714348	-0.790046	0.0596056	-0.449612	0.409185
ENSMUSG00000025964.15	Adam23	17907	1.27117	0.533552	0.320883	0.17477	-1.25611	0.134761	-1.99697	0.0102282	-2.87887	0.000101055	-0.740865	0.669318	-1.62276	0.0424094	-0.881896	0.399521
ENSMUSG00000025959.13	Klf7	8131	4.60925	9.52533	8.38942	10.7715	1.04803	0.00559896	0.86461	0.024048	1.22566	0.000719244	-0.18342	0.852413	0.177629	0.714108	0.361049	0.492356
ENSMUSG00000070871.10	Ccnyl1	3456	2.32741	6.24255	5.74208	6.65232	1.42879	4.8702e-13	1.31051	3.66274e-11	1.52122	5.62806e-15	-0.118282	0.814489	0.0924277	0.719408	0.210709	0.438924
ENSMUSG00000025955.13	Akr1cl	4209	1.00507	0.0102519	0.0133697	0.0102519	-9.1121	6.73837e-15	-8.41207	6.75331e-13	-9.30966	9.69763e-16	0.700036	0.890813	0	1	-0.897596	0.769515
ENSMUSG00000025952.15	Crygc	786	6.40767	0.0548984	0.0548984	0.0548984	-9.3646	2.35904e-16	-9.38591	1.70352e-16	-9.56216	3.06023e-17	0	1	0	1	0	1
ENSMUSG00000025950.16	Idh1	2771	21.8915	60.2858	51.7585	69.2653	1.46212	0.0121221	1.24191	0.0346161	1.66237	0.00282645	-0.220204	0.889291	0.200251	0.794119	0.420455	0.62587
ENSMUSG00000026003.5	Acadl	2005	24.3553	55.0442	61.5642	75.2938	1.1771	6.39716e-08	1.33879	4.74422e-10	1.6291	1.30653e-14	0.161691	0.771184	0.452	0.0552734	0.290309	0.325585
ENSMUSG00000026000.16	Lancl1	6863	4.64621	2.64604	2.46649	1.82255	-0.813542	4.57231e-21	-0.920856	1.4058e-26	-1.35091	7.10961e-55	-0.107314	0.599791	-0.537369	9.88878e-10	-0.430055	3.43431e-06
ENSMUSG00000025997.13	Ikzf2	11613	5.03563	4.40398	4.84931	9.031	-0.193463	0.74429	-0.054272	0.930763	0.843018	0.06852	0.139191	0.91214	1.03648	0.025026	0.89729	0.0827957
ENSMUSG00000026196.7	Bard1	5659	0.555912	2.11748	3.19409	3.07611	1.94281	8.82431e-08	2.54018	8.34878e-13	2.48452	1.91676e-12	0.597363	0.387307	0.541708	0.167969	-0.0556544	0.938125
ENSMUSG00000026192.13	Atic	7985	3.58782	6.88496	8.87599	6.87171	0.941585	7.03618e-05	1.30883	1.18571e-08	0.939394	5.1796e-05	0.367244	0.432272	-0.00219092	0.998088	-0.369435	0.210148
ENSMUSG00000026193.15	Fn1	11685	38.2512	609.284	500.959	210.006	3.99368	2.71431e-29	3.71126	1.94547e-25	2.45699	9.04271e-12	-0.282425	0.765366	-1.53669	2.33891e-05	-1.25427	0.00120225
ENSMUSG00000039395.8	Mreg	2284	1.10271	1.86971	2.09137	8.64602	0.772525	0.270602	0.935584	0.16064	2.99321	2.36261e-07	0.16306	0.924398	2.22069	0.000103251	2.05763	0.00055793
ENSMUSG00000026189.13	Pecr	1516	8.99232	3.57394	3.62559	2.74991	-1.34011	2.37873e-13	-1.31263	5.64402e-13	-1.71553	2.90983e-21	0.0274776	0.964528	-0.375424	0.082092	-0.402901	0.0830879
ENSMUSG00000026185.8	Igfbp5	6006	103.733	276.253	224.529	18.2461	1.41318	0.0816057	1.11409	0.174813	-2.50766	0.000635578	-0.299088	0.887839	-3.92084	1.30458e-08	-3.62175	2.89729e-07
ENSMUSG00000055322.16	Tns1	16465	110.437	24.2222	19.2563	26.1792	-2.18895	0.000145759	-2.52006	8.60078e-06	-2.07683	0.000247904	-0.331107	0.827521	0.112119	0.894574	0.443226	0.616786
ENSMUSG00000026180.8	Cxcr2	3048	0.0428066	3.54715	2.07417	21.3211	6.99791	1.60944e-09	6.22087	9.16821e-08	9.59073	2.1171e-17	-0.777034	0.716935	2.59282	0.00439444	3.36985	0.000192248
ENSMUSG00000048480.5	Cxcr1	1491	0.0289404	0.128513	0.107477	1.59063	3.69197	0.0255274	3.44613	0.0376423	7.68546	1.09146e-07	-0.245847	0.933657	3.99349	1.43505e-06	4.23933	7.5476e-07
ENSMUSG00000006304.14	Arpc2	2033	55.0307	128.919	123.698	185.431	1.22852	1.82163e-06	1.16896	5.50173e-06	1.75293	1.83161e-12	-0.0595605	0.939106	0.524414	0.0599805	0.583974	0.0483088
ENSMUSG00000026179.14	Pnkd	7832	13.83	1.94156	1.5786	1.54967	-2.83662	1.55054e-99	-3.13182	2.51256e-119	-3.16436	4.46778e-123	-0.295195	0.303131	-0.327737	0.0414975	-0.0325422	0.914021
ENSMUSG00000026177.11	Slc11a1	3705	0.675871	5.99402	3.24054	6.25471	3.17123	4.79103e-06	2.28035	0.00134962	3.23279	2.04417e-06	-0.89088	0.543428	0.0615549	0.953845	0.952435	0.293289
ENSMUSG00000026175.12	Vil1	3551	0.147337	9.45367	4.92086	3.96908	6.12963	8.40457e-08	5.18591	7.02278e-06	4.87512	2.02176e-05	-0.943717	0.726643	-1.25451	0.345437	-0.310795	0.885017
ENSMUSG00000026174.9	Cnot9	3826	7.58345	12.1084	15.2363	16.623	0.675997	0.00742879	1.00897	2.63834e-05	1.13359	1.39822e-06	0.33297	0.509226	0.457596	0.0777737	0.124627	0.761014
ENSMUSG00000033227.7	Wnt6	2192	2.0463	0.517939	0.21941	0.103074	-2.02809	1.02971e-05	-3.40195	1.64317e-12	-4.5806	5.51702e-18	-1.37385	0.0954898	-2.55251	6.47972e-06	-1.17865	0.117026
ENSMUSG00000026167.14	Wnt10a	2468	0.67175	0.408153	0.190022	1.20821	-0.746833	0.574094	-1.93274	0.0938447	0.864557	0.462511	-1.1859	0.613545	1.61139	0.165796	2.79729	0.0150849
ENSMUSG00000006538.12	Ihh	3048	0.658084	1.48847	0.686138	0.244719	1.19561	0.309975	0.0585008	0.971003	-1.47138	0.177118	-1.13711	0.601739	-2.667	0.00986236	-1.52988	0.237608
ENSMUSG00000026198.15	Abcb6	5315	5.55913	1.86182	1.90938	1.67301	-1.58415	5.34059e-25	-1.54286	6.46047e-24	-1.73556	3.0194e-30	0.0412883	0.933657	-0.151406	0.461441	-0.192695	0.406377
ENSMUSG00000026200.13	Glb1l	5905	1.83191	2.96599	2.51993	1.20339	0.698432	0.014922	0.461348	0.122324	-0.605024	0.033235	-0.237084	0.70878	-1.30346	3.39557e-07	-1.06637	7.96821e-05
ENSMUSG00000026202.13	Tuba4a	3701	14.9854	22.3373	37.2469	61.9673	0.576296	0.100169	1.31459	2.80377e-05	2.04878	1.20743e-11	0.738291	0.158839	1.47248	8.29616e-07	0.734193	0.0385914
ENSMUSG00000026204.15	Ptprn	4249	0.987988	10.6093	7.88231	2.558	3.43836	6.88749e-08	3.0095	2.69043e-06	1.38211	0.0408771	-0.428865	0.795131	-2.05625	0.00137019	-1.62739	0.0218546
ENSMUSG00000026208.9	Des	3754	157.4	73.3909	80.7186	7.10826	-1.10088	0.367477	-0.963616	0.425079	-4.47096	7.45451e-06	0.137262	0.965306	-3.37008	0.000926069	-3.50735	0.000793852
ENSMUSG00000026207.16	Speg	12741	5.63699	2.44393	1.97057	0.579796	-1.20705	0.0108367	-1.51895	0.000896289	-3.28737	2.91768e-14	-0.3119	0.787593	-2.08032	1.54058e-06	-1.76842	0.000101767
ENSMUSG00000033007.15	Asic4	2727	1.39246	0.0576973	0.0231281	0.0158233	-5.0443	1.41499e-06	-7.52121	8.64214e-08	-9.15132	8.16248e-11	-2.47691	0.437527	-4.10702	0.0141554	-1.6301	0.576893
ENSMUSG00000032997.16	Chpf	3856	11.3399	15.8074	14.9333	7.23338	0.479722	0.122334	0.397889	0.201767	-0.648671	0.0234348	-0.0818332	0.918564	-1.12839	2.54965e-05	-1.04656	0.000179025
ENSMUSG00000026211.17	Obsl1	8467	2.22133	5.22719	5.7446	2.49465	1.23633	0.0181912	1.37306	0.00713403	0.168336	0.782635	0.136732	0.924112	-1.06799	0.0411108	-1.20473	0.0280806
ENSMUSG00000006576.16	Slc4a3	8599	6.01098	1.97216	1.81587	0.84819	-1.61069	1.20282e-06	-1.73088	1.39449e-07	-2.83044	1.07936e-18	-0.120188	0.901167	-1.21975	0.000265203	-1.09956	0.00182932
ENSMUSG00000026235.14	Epha4	8054	1.38164	2.5956	2.7845	6.5666	0.912314	0.143756	1.01493	0.0916408	2.25304	3.34258e-05	0.102612	0.952027	1.34073	0.019328	1.23812	0.0481649
ENSMUSG00000032908.9	Sgpp2	4002	0.841336	1.26509	0.816986	5.27331	0.595064	0.280502	-0.0400605	0.955016	2.66312	3.21128e-09	-0.635124	0.5199	2.06806	2.07867e-06	2.70318	3.01768e-10
ENSMUSG00000032883.15	Acsl3	4357	9.11332	9.78625	9.47199	19.491	0.102885	0.873232	0.0560415	0.930533	1.09738	0.0182872	-0.046844	0.974521	0.994498	0.0383908	1.04134	0.0425847
ENSMUSG00000050711.7	Scg2	2515	1.13828	0.0459618	0.0917526	0.0709109	-5.29053	2.59369e-09	-3.84086	4.31141e-07	-4.38885	1.25026e-08	1.44967	0.493545	0.901683	0.481725	-0.547985	0.710603
ENSMUSG00000054702.14	Ap1s3	2878	13.8519	5.66313	4.93681	6.93266	-1.2922	0.00387776	-1.49252	0.000643406	-1.00072	0.0242877	-0.200315	0.866092	0.291478	0.601059	0.491793	0.416772
ENSMUSG00000073643.11	Wdfy1	6488	4.78343	3.13018	3.26492	2.35697	-0.613184	0.000611339	-0.555518	0.00194232	-1.02224	1.80353e-09	0.0576658	0.908798	-0.409058	0.0276571	-0.466723	0.0155524
ENSMUSG00000026249.10	Serpine2	8287	161.822	22.3593	21.2123	10.8237	-2.85579	3.69961e-06	-2.93169	1.7388e-06	-3.90271	6.43486e-11	-0.075896	0.969397	-1.04692	0.129921	-0.971028	0.220663
ENSMUSG00000038608.15	Dock10	18267	0.706635	3.16008	2.19245	2.64421	2.16473	0.000195883	1.63639	0.00587633	1.90742	0.000904364	-0.528335	0.693802	-0.257308	0.73976	0.271027	0.787918
ENSMUSG00000055980.2	Irs1	9144	11.3249	6.13959	4.57418	1.98346	-0.883848	0.0183545	-1.30874	0.000229925	-2.51598	1.03276e-13	-0.424891	0.583599	-1.63213	1.37157e-06	-1.20724	0.000922426
ENSMUSG00000067158.9	Col4a4	10612	3.12649	0.947031	0.467326	5.20151	-1.72753	0.0717316	-2.75685	0.00203931	0.735167	0.458595	-1.02931	0.593153	2.4627	0.00571058	3.49201	6.27516e-05
ENSMUSG00000079465.8	Col4a3	9967	1.99242	0.824767	0.372794	8.69165	-1.27707	0.253899	-2.43649	0.0158511	2.12755	0.0324875	-1.15942	0.584453	3.40462	0.000337223	4.56404	9.58978e-07
ENSMUSG00000045658.16	Pid1	8172	5.22076	5.58139	3.55955	1.7771	0.096497	0.930671	-0.553954	0.544406	-1.55734	0.0452945	-0.650451	0.71547	-1.65384	0.0369207	-1.00339	0.31513
ENSMUSG00000036766.12	Dner	4784	2.42435	0.403227	0.145225	0.0276252	-2.61791	0.00092952	-4.15394	7.80657e-08	-7.01535	8.87371e-16	-1.53603	0.312384	-4.39743	9.96918e-07	-2.8614	0.00497451
ENSMUSG00000026219.14	Trip12	16601	16.9279	27.3771	29.7853	38.3946	0.693626	0.00271685	0.815366	0.000305408	1.18157	5.22202e-08	0.12174	0.840248	0.487945	0.0402703	0.366205	0.191555
ENSMUSG00000073633.9	Fbxo36	2148	1.61523	0.800473	1.14116	1.12518	-1.03095	5.90143e-06	-0.509757	0.0269837	-0.530552	0.016329	0.521189	0.182145	0.500394	0.0366468	-0.0207945	0.962857
ENSMUSG00000026220.6	Slc16a14	3352	0.0761414	1.09447	1.11003	11.7585	4.10349	0.00977565	4.12582	0.00853603	7.54504	2.68937e-07	0.0223221	0.997236	3.44155	0.0212792	3.41923	0.0332115
ENSMUSG00000118590.1	AC167036.1	1120	0.058019	0.5083	0.560871	1.45467	4.58257	0.00549943	4.74005	0.00354898	6.16394	7.16733e-05	0.157481	0.957383	1.58138	0.123166	1.42389	0.227273
ENSMUSG00000118607.1	AC147806.2	2798	0.0232242	0.350239	0.643037	3.65043	5.4114	0.00101672	6.31831	8.4407e-05	8.84797	1.10204e-08	0.906912	0.688854	3.43657	0.00027608	2.52966	0.014929
ENSMUSG00000070034.13	Sp110	6781	0.593259	3.35298	3.31962	2.83568	2.51281	2.14742e-16	2.49673	2.8638e-16	2.26958	9.5825e-14	-0.0160831	0.988066	-0.243233	0.51967	-0.22715	0.628395
ENSMUSG00000070031.11	Sp140	3328	1.13545	5.93603	5.99571	4.64032	2.40101	1.31803e-13	2.41346	8.07553e-14	2.04497	2.67198e-10	0.0124489	0.99205	-0.356047	0.346595	-0.368496	0.406224
ENSMUSG00000026222.16	Sp100	7556	2.76183	9.33647	11.3552	11.1945	1.76016	3.97607e-13	2.04238	1.6962e-17	2.02185	2.50424e-17	0.282223	0.602954	0.26169	0.377935	-0.0205334	0.969292
ENSMUSG00000052760.16	A630001G21Rik	2709	0.635015	2.46319	1.94995	1.27903	1.98302	2.08315e-08	1.6389	4.90552e-06	1.03045	0.00529634	-0.344118	0.641382	-0.952572	0.00439444	-0.608454	0.12854
ENSMUSG00000026228.6	Htr2b	2131	0.127602	3.39514	2.68866	1.10169	4.99191	1.18066e-18	4.65121	2.61943e-16	3.35689	6.03793e-09	-0.3407	0.68414	-1.63503	3.24634e-06	-1.29433	0.000582627
ENSMUSG00000079445.3	B3gnt7	4137	9.74958	3.01292	2.38144	4.1784	-1.69807	1.81678e-09	-2.0389	2.86317e-13	-1.22334	1.48359e-05	-0.340832	0.597458	0.474723	0.143019	0.815555	0.00942109
ENSMUSG00000026241.5	Nppc	1042	0.138891	4.31616	3.77062	0.0865435	5.44995	0.000365141	5.25406	0.000571875	-1.14432	0.552766	-0.195882	0.962822	-6.59426	7.12876e-06	-6.39838	2.27157e-05
ENSMUSG00000026255.15	Efhd1	2125	4.99818	0.457922	0.21303	0.246972	-3.50872	6.6506e-06	-4.73055	1.5291e-09	-4.45134	6.71785e-09	-1.22184	0.479297	-0.942628	0.329446	0.279209	0.860456
ENSMUSG00000026259.14	Ngef	3905	5.17067	1.33293	1.42152	2.03734	-1.96412	8.58656e-07	-1.8751	2.48658e-06	-1.34904	0.000753111	0.089017	0.943045	0.615081	0.179701	0.526064	0.33611
ENSMUSG00000079434.8	Neu2	2590	2.869	0.297692	0.104773	0.151081	-3.35381	2.18839e-07	-5.0994	1.45472e-13	-4.40649	1.32953e-11	-1.74559	0.171855	-1.05269	0.192676	0.692905	0.550023
ENSMUSG00000026288.14	Inpp5d	7602	1.09695	8.67672	6.08006	7.1187	2.99052	2.02971e-08	2.47655	4.2276e-06	2.70482	3.13959e-07	-0.513975	0.68316	-0.285702	0.690082	0.228273	0.813212
ENSMUSG00000090165.8	Ugt1a10	2267	3.82168	15.2931	11.2636	32.907	2.00603	0.00115597	1.56393	0.0129996	3.11225	1.00781e-07	-0.4421	0.769975	1.10622	0.0906155	1.54832	0.0187651
ENSMUSG00000090175.1	Ugt1a9	2190	3.95605	15.8538	11.6716	34.0562	2.00812	0.00114965	1.56541	0.0129648	3.11192	1.0302e-07	-0.442709	0.769936	1.1038	0.0916344	1.54651	0.0190112
ENSMUSG00000089675.1	Ugt1a8	2227	3.89032	15.5632	11.4614	33.4945	2.0056	0.00116716	1.56336	0.0130971	3.1121	1.02831e-07	-0.442241	0.770074	1.10649	0.0907652	1.54874	0.0188135
ENSMUSG00000090124.7	Ugt1a7c	4219	3.24279	12.962	9.72893	26.3227	2.00237	0.000476688	1.58788	0.00642894	3.02479	2.88951e-08	-0.41449	0.769936	1.02242	0.0957093	1.43691	0.0201012
ENSMUSG00000090145.7	Ugt1a6b	2382	3.73976	15.2546	11.2289	32.3562	2.03353	0.000769061	1.59061	0.00982099	3.11899	5.44828e-08	-0.442919	0.765311	1.08546	0.0911378	1.52838	0.018094
ENSMUSG00000054545.17	Ugt1a6a	4312	3.01488	9.33251	7.0245	19.7773	1.63337	0.00590846	1.22274	0.0444067	2.71747	9.38395e-07	-0.410625	0.774594	1.0841	0.0780304	1.49472	0.0158699
ENSMUSG00000089943.1	Ugt1a5	2203	4.26092	16.1114	11.8354	34.2827	1.92378	0.00172386	1.47791	0.0184884	3.01386	2.00699e-07	-0.445873	0.766227	1.09008	0.0928873	1.53595	0.0186392
ENSMUSG00000090171.1	Ugt1a2	2211	4.1107	15.8645	11.6645	33.9517	1.95343	0.0014976	1.50886	0.0163646	3.05181	1.54953e-07	-0.444573	0.768375	1.09838	0.0913224	1.54295	0.0185249
ENSMUSG00000089960.1	Ugt1a1	2224	4.04722	15.9175	11.6999	36.8334	1.98076	0.00245918	1.53579	0.0214822	3.19194	2.15493e-07	-0.444967	0.781542	1.21118	0.0766735	1.65614	0.0165046
ENSMUSG00000049866.12	Arl4c	5492	7.47123	31.4932	25.2323	16.9537	2.07688	2.82279e-20	1.75729	8.63041e-15	1.18336	2.50166e-07	-0.319596	0.519741	-0.89352	9.33704e-05	-0.573924	0.0279922
ENSMUSG00000036206.12	Sh3bp4	5112	42.8433	11.4804	11.5039	13.2652	-1.90056	2.14742e-16	-1.89722	2.05787e-16	-1.69156	2.08778e-13	0.003341	0.997666	0.209	0.486892	0.205659	0.574287
ENSMUSG00000034486.8	Gbx2	2177	0.028417	1.66879	1.02484	0.172753	7.34671	1.99361e-08	6.63175	4.54936e-07	3.93417	0.00414906	-0.714964	0.2553	-3.41254	8.98185e-19	-2.69757	2.65408e-11
ENSMUSG00000044337.5	Ackr3	3348	3.73583	5.20793	5.81343	10.01	0.480046	0.371566	0.64008	0.203874	1.42527	0.00146429	0.160035	0.899847	0.94522	0.046216	0.785185	0.149262
ENSMUSG00000048126.16	Col6a3	11963	21.9877	138.648	115.103	18.7848	2.65686	3.91611e-05	2.38836	0.000233196	-0.227154	0.775455	-0.268502	0.884822	-2.88401	2.97457e-06	-2.61551	4.56378e-05
ENSMUSG00000026303.6	Mlph	5357	55.5717	18.798	11.7756	13.8734	-1.56413	0.00391048	-2.23955	1.62828e-05	-2.00268	0.000105525	-0.675423	0.547646	-0.438549	0.502532	0.236874	0.798256
ENSMUSG00000026304.13	Rab17	1992	3.04408	1.513	1.21786	0.507077	-1.01828	0.253359	-1.34392	0.110077	-2.64056	0.000650399	-0.325639	0.883257	-1.62228	0.0519936	-1.29664	0.183458
ENSMUSG00000026305.15	Lrrfip1	6469	18.2682	28.1501	27.8123	39.808	0.62401	0.0508886	0.606504	0.0546223	1.12391	0.000109629	-0.0175062	0.986713	0.499898	0.124742	0.517404	0.151103
ENSMUSG00000034353.14	Ramp1	3022	15.7352	8.5647	3.77553	2.82947	-0.878439	0.181868	-2.0644	0.000399809	-2.48018	1.19268e-05	-1.18596	0.25802	-1.60174	0.00682518	-0.415784	0.651005
ENSMUSG00000047443.14	Erfe	2815	0.118516	1.47235	1.7326	1.46136	3.8324	2.11259e-10	4.06999	9.84652e-12	3.81948	1.44414e-10	0.237589	0.850058	-0.0129162	0.988348	-0.250505	0.747315
ENSMUSG00000067071.8	Hes6	1808	4.9465	12.5715	10.3172	8.99542	1.35023	2.74999e-06	1.06477	0.000277612	0.865915	0.00313132	-0.285456	0.662129	-0.484311	0.123166	-0.198855	0.660516
ENSMUSG00000007805.4	Twist2	3174	1.56978	2.25984	1.42499	0.18931	0.529046	0.313672	-0.148821	0.803617	-3.15932	1.07598e-11	-0.677868	0.447947	-3.68837	3.24841e-17	-3.0105	3.03582e-11
ENSMUSG00000034220.7	Gpc1	5159	6.22056	24.1696	24.1351	17.6782	1.9595	9.90352e-07	1.95766	8.98789e-07	1.5083	0.000168016	-0.00183688	1	-0.451201	0.347204	-0.449365	0.42948
ENSMUSG00000026271.15	Gpr35	4839	0.289755	3.96081	3.11185	3.71274	3.82149	2.10969e-15	3.472	6.43701e-13	3.72856	6.21376e-15	-0.349495	0.765105	-0.092926	0.892525	0.256569	0.742927
ENSMUSG00000014602.15	Kif1a	9330	2.99953	1.66731	1.39672	0.636261	-0.848771	0.395248	-1.10632	0.238638	-2.24494	0.00764433	-0.257547	0.913653	-1.39617	0.129603	-1.13862	0.30116
ENSMUSG00000034159.12	Mab21l4	2368	0.0874579	3.33358	1.30671	3.87383	5.5828	4.45022e-09	4.21924	1.35116e-05	5.80001	6.11218e-10	-1.36356	0.390475	0.21721	0.848396	1.58077	0.0964114
ENSMUSG00000047793.13	Sned1	9491	6.92186	6.08464	4.08012	1.94996	-0.186108	0.841921	-0.763699	0.320615	-1.82993	0.00674951	-0.577591	0.716265	-1.64382	0.0176654	-1.06623	0.204642
ENSMUSG00000026274.11	Pask	9060	0.598064	1.22631	1.7035	1.4819	1.04086	0.00129725	1.51893	9.40054e-07	1.3166	2.03067e-05	0.478072	0.433659	0.275739	0.462421	-0.202333	0.678106
ENSMUSG00000026276.20	Septin2	7979	18.5144	38.6196	39.3484	34.5917	1.06085	2.05453e-24	1.08824	1.02293e-25	0.902063	4.57395e-18	0.0273916	0.932816	-0.158784	0.197644	-0.186176	0.165133
ENSMUSG00000116048.1	Septin2	3335	41.2693	89.4121	91.2002	80.9952	1.11561	2.88139e-22	1.14458	1.79538e-23	0.973077	2.50424e-17	0.0289782	0.935778	-0.142529	0.311068	-0.171507	0.274572
ENSMUSG00000026278.14	Bok	1840	7.06308	23.5159	27.7252	34.5392	1.73871	8.00311e-05	1.97685	5.16175e-06	2.29377	6.58149e-08	0.23814	0.838653	0.555054	0.271314	0.316915	0.64387
ENSMUSG00000040710.10	St8sia4	20091	0.223108	1.69508	1.18554	1.39293	2.93755	2.52307e-13	2.42065	2.17766e-09	2.65432	2.99209e-11	-0.516893	0.550008	-0.283228	0.584978	0.233665	0.728899
ENSMUSG00000040693.7	Slco4c1	4908	21.4365	1.84717	0.952378	3.36586	-3.54311	3.03601e-05	-4.50679	6.15147e-08	-2.67397	0.00168448	-0.963681	0.606864	0.869143	0.397956	1.83282	0.0629067
ENSMUSG00000067006.12	Serpinb5	2750	2.39085	20.6292	21.0734	38.7845	3.11809	3.52602e-08	3.14889	2.20893e-08	4.02925	2.6857e-13	0.0308021	0.988014	0.911158	0.153816	0.880356	0.22729
ENSMUSG00000044594.14	Serpinb3a	1631	0.0666115	4.2949	2.52813	9.22422	6.74689	0.02187	5.97641	0.0426333	7.8546	0.00494915	-0.770483	0.918959	1.1077	0.756197	1.87819	0.650385
ENSMUSG00000026327.8	Serpinb11	2186	0.123274	1.12065	1.53542	2.81291	3.41293	0.00500244	3.87506	0.00109597	4.75528	3.36513e-05	0.46213	0.879102	1.34235	0.281094	0.880223	0.588589
ENSMUSG00000062345.10	Serpinb2	2349	0.0552581	0.157079	0.831798	1.02297	1.93687	0.297127	4.49205	0.0051728	4.79621	0.00217487	2.55519	0.342938	2.85934	0.0534586	0.304153	0.908871
ENSMUSG00000026315.13	Serpinb8	4795	0.926085	2.57179	1.82849	2.16867	1.48227	0.0270384	0.986001	0.156983	1.23485	0.0597929	-0.496267	0.74679	-0.247418	0.770874	0.248849	0.825118
ENSMUSG00000047216.8	Cdh19	4280	2.04774	0.144699	0.125232	0.0251926	-3.914	1.0176e-10	-4.17499	6.31269e-12	-7.1089	3.70066e-19	-0.260991	0.892991	-3.19491	0.000310529	-2.93392	0.0017483
ENSMUSG00000038702.6	Dsel	5763	2.49451	10.8573	9.69669	4.37015	2.12525	2.68026e-09	1.96237	4.03546e-08	0.810777	0.032578	-0.162874	0.871117	-1.31447	0.000227108	-1.1516	0.00232384
ENSMUSG00000048402.14	Gli2	6869	0.748968	4.00551	2.58571	0.477467	2.42915	1.67157e-05	1.79665	0.00186811	-0.655027	0.298102	-0.6325	0.605829	-3.08418	4.6813e-09	-2.45168	9.30209e-06
ENSMUSG00000037035.5	Inhbb	4255	3.3211	19.6224	22.3076	29.8154	2.56656	6.67508e-23	2.75218	2.66094e-26	3.17056	6.33177e-35	0.185622	0.786903	0.603999	0.0327788	0.418377	0.219594
ENSMUSG00000004451.14	Ralb	4930	7.25825	18.0945	16.8903	17.7681	1.31959	7.07273e-26	1.21965	2.83064e-22	1.29288	3.60358e-25	-0.0999423	0.753791	-0.0267162	0.887802	0.0732261	0.732863
ENSMUSG00000098923.1	Tmem185b	2824	3.15339	6.12122	5.69869	7.26131	0.960317	1.59339e-06	0.859513	1.92777e-05	1.20867	4.2538e-10	-0.100804	0.847	0.248357	0.262258	0.349161	0.133169
ENSMUSG00000026383.14	Epb41l5	14758	2.93235	1.67518	2.25906	3.9861	-0.808336	0.000122281	-0.376429	0.0973026	0.443329	0.0393452	0.431907	0.253639	1.25167	6.36763e-11	0.819758	7.1174e-05
ENSMUSG00000050777.7	Tmem37	1311	1.26104	3.61242	1.92914	5.45457	1.54714	0.0015623	0.622945	0.25691	2.14657	3.57227e-06	-0.924195	0.269152	0.599434	0.244627	1.52363	0.00109905
ENSMUSG00000026389.16	Steap3	5715	1.57199	9.02216	5.22738	2.2114	2.5262	2.96503e-12	1.73636	2.66503e-06	0.494494	0.226456	-0.789834	0.22448	-2.0317	3.67645e-09	-1.24187	0.00111503
ENSMUSG00000026390.7	Marco	1925	0.0224157	0.10266	0.163292	8.37434	3.76877	0.04859	4.56027	0.0119508	10.4713	2.10141e-10	0.7915	0.80736	6.70256	2.33685e-09	5.91106	1.19416e-07
ENSMUSG00000026341.16	Actr3	4631	26.4533	77.5977	76.2793	93.3727	1.55292	9.65943e-21	1.52832	3.38341e-20	1.81984	1.65973e-28	-0.0245992	0.964053	0.266923	0.171692	0.291522	0.176222
ENSMUSG00000049690.15	Nckap5	12100	0.26636	0.299743	0.204316	3.35017	0.172424	0.861743	-0.390927	0.66178	3.67038	5.56095e-08	-0.56335	0.744025	3.49796	8.16097e-08	4.06131	3.90966e-10
ENSMUSG00000036155.13	Mgat5	10291	2.61062	17.5735	16.6074	18.6091	2.7532	2.55345e-19	2.67157	2.78016e-18	2.83581	1.16554e-20	-0.0816292	0.932573	0.082608	0.856136	0.164237	0.763943
ENSMUSG00000026347.13	Tmem163	4292	0.0344459	0.286975	0.144185	1.04759	3.5294	0.000206272	2.48705	0.0122945	5.4344	1.4348e-09	-1.04235	0.433659	1.905	0.00261721	2.94735	2.90876e-06
ENSMUSG00000036104.12	Rab3gap1	11739	9.60525	4.83763	4.5679	4.4022	-0.989941	8.02691e-15	-1.0739	2.37835e-17	-1.12719	3.16521e-19	-0.0839632	0.808453	-0.13725	0.392432	-0.0532864	0.825594
ENSMUSG00000026354.8	Lct	6406	4.58361	0.21158	0.194527	0.130214	-4.48106	7.89798e-23	-4.60891	5.25709e-24	-5.20537	9.98209e-30	-0.127852	0.932816	-0.724308	0.217426	-0.596456	0.407296
ENSMUSG00000026355.11	Mcm6	4666	3.7124	29.032	40.4406	38.9473	2.97064	1.47169e-20	3.44918	1.55246e-27	3.39469	6.83674e-27	0.478539	0.488644	0.424047	0.269975	-0.0544922	0.936386
ENSMUSG00000045382.6	Cxcr4	1808	1.00951	16.0126	11.8423	41.6867	4.01994	2.28712e-14	3.58466	1.15747e-11	5.40172	1.19894e-25	-0.435283	0.729567	1.38177	0.0098687	1.81706	0.000637906
ENSMUSG00000026399.12	Cd55	4853	4.1236	8.31191	7.07787	11.7174	1.013	0.000382389	0.780209	0.00735116	1.50878	2.7189e-08	-0.232789	0.728774	0.495782	0.103674	0.728571	0.0166115
ENSMUSG00000042510.7	AA986860	3640	3.99474	11.2461	8.95872	22.8683	1.49621	0.0303477	1.16725	0.0967851	2.52067	7.26408e-05	-0.328955	0.850624	1.02446	0.154401	1.35341	0.0699717
ENSMUSG00000026417.13	Pigr	4025	4.43732	300.301	142.078	39.1451	6.08416	9.53483e-09	5.00437	2.92765e-06	3.14434	0.00407386	-1.07979	0.665913	-2.93982	0.00812036	-1.86002	0.164654
ENSMUSG00000004552.16	Ctse	3170	0.895997	34.1167	10.7277	19.2879	5.27353	4.4697e-10	3.60305	3.1246e-05	4.45027	1.27295e-07	-1.67048	0.301627	-0.823261	0.432257	0.847219	0.497956
ENSMUSG00000052688.12	Rab7b	4624	1.43329	6.8288	4.17163	3.30324	2.26007	6.16649e-06	1.54644	0.00269639	1.20952	0.0193167	-0.713631	0.492566	-1.05055	0.0477273	-0.336919	0.673395
ENSMUSG00000042268.10	Slc26a9	5226	0.0201925	0.0553994	0.111192	3.23438	1.97942	0.160197	3.13532	0.0138239	8.09438	1.83608e-12	1.15589	0.540391	6.11496	2.22164e-15	4.95907	4.70678e-11
ENSMUSG00000059149.17	Mfsd4a	7187	0.446364	7.74915	5.11701	2.51494	4.13688	6.79413e-08	3.53751	4.67258e-06	2.51125	0.00133238	-0.599374	0.754137	-1.62563	0.0486217	-1.02626	0.321136
ENSMUSG00000042115.4	Klhdc8a	4269	0.100483	2.28613	1.21007	1.09485	4.64926	3.26583e-14	3.72003	1.97415e-09	3.58127	6.09729e-09	-0.929222	0.367613	-1.06799	0.0593183	-0.138768	0.892355
ENSMUSG00000009772.15	Nuak2	3920	1.38714	7.62782	6.27138	8.20165	2.46857	6.38345e-14	2.18395	3.82222e-11	2.57322	2.60788e-15	-0.284618	0.717833	0.104648	0.820687	0.389266	0.393893
ENSMUSG00000042066.16	Tmcc2	5692	1.93924	3.05475	3.14438	6.07542	0.657378	0.282031	0.698885	0.23737	1.65132	0.00156054	0.0415069	0.980766	0.993943	0.0772547	0.952436	0.129273
ENSMUSG00000026442.14	Nfasc	14145	0.270136	4.39035	2.71977	0.0440097	4.03852	5.72805e-06	3.34691	0.000201455	-2.69857	0.00352576	-0.691608	0.754001	-6.73709	3.07893e-16	-6.04548	6.44861e-13
ENSMUSG00000026443.3	Lrrn2	3595	1.77337	10.0894	6.02029	0.584723	2.51635	3.03493e-05	1.76944	0.00440327	-1.61707	0.0094254	-0.746912	0.563019	-4.13343	7.24549e-14	-3.38651	3.10942e-09
ENSMUSG00000026447.17	Pik3c2b	9592	12.747	6.04455	4.73774	5.49072	-1.07683	2.21667e-05	-1.42928	7.92673e-09	-1.21567	8.9542e-07	-0.35245	0.513896	-0.138838	0.680599	0.213611	0.58092
ENSMUSG00000103421.1	Golt1a	1919	4.17992	0.633387	0.328649	0.197427	-2.76544	0.000443366	-3.80096	9.99767e-07	-4.55909	4.01577e-09	-1.03551	0.549412	-1.79365	0.040009	-0.758137	0.543067
ENSMUSG00000115958.1	Gm28040	741	5.42265	0.719889	0.124567	0.176581	-3.01798	0.00323468	-6.5179	6.25755e-08	-5.49334	2.02829e-07	-3.49992	0.0800428	-2.47536	0.0391379	1.02456	0.635732
ENSMUSG00000098306.9	Gm28040	1465	6.56395	0.830958	0.34767	0.260615	-3.02645	0.000527418	-4.39582	3.40416e-07	-4.81349	1.76684e-08	-1.36937	0.449749	-1.78705	0.0663059	-0.417674	0.79863
ENSMUSG00000116158.1	Kiss1	779	6.18469	0.823372	0.265749	0.225706	-2.99449	0.00346792	-4.93238	1.86034e-06	-5.1651	4.39928e-07	-1.93789	0.35824	-2.17061	0.0631537	-0.232721	0.918431
ENSMUSG00000070644.13	Etnk2	4566	1.01961	0.343197	0.377326	0.332068	-1.59435	5.36517e-05	-1.45249	0.000223826	-1.6481	1.78573e-05	0.141861	0.90285	-0.0537585	0.931045	-0.19562	0.781455
ENSMUSG00000070643.11	Sox13	4312	6.63174	5.02576	7.38056	11.2533	-0.400752	0.325807	0.155475	0.728325	0.763929	0.0312792	0.556227	0.418558	1.16468	0.000621365	0.608454	0.145398
ENSMUSG00000090553.8	Snrpe	1372	10.6818	20.7353	26.6128	29.3895	0.958708	0.000156822	1.32112	7.39169e-08	1.46265	1.3914e-09	0.362414	0.479377	0.503939	0.0560772	0.141525	0.730146
ENSMUSG00000026463.17	Atp2b4	12248	30.2948	8.22339	5.69551	2.69872	-1.88174	0.00376809	-2.41211	0.000123515	-3.49032	8.28721e-09	-0.530366	0.725182	-1.60857	0.0131836	-1.0782	0.164596
ENSMUSG00000010311.15	Optc	2575	2.37867	0.749174	0.339865	0.0441357	-1.6909	0.109598	-2.88634	0.00329384	-6.41879	1.25513e-09	-1.19545	0.566863	-4.7279	1.28411e-05	-3.53245	0.00293959
ENSMUSG00000041559.7	Fmod	3306	17.7393	33.8626	8.20887	2.11433	0.933195	0.209311	-1.11292	0.117381	-3.07684	1.15616e-06	-2.04611	0.0247805	-4.01003	2.01075e-11	-1.96392	0.004269
ENSMUSG00000020423.6	Btg2	2743	15.0841	42.3694	26.5525	44.1071	1.49097	1.034e-05	0.81601	0.0225628	1.54881	2.93415e-06	-0.674959	0.281508	0.0578373	0.908905	0.732797	0.0604934
ENSMUSG00000064246.10	Chil1	2804	0.0958641	0.716066	1.68531	85.7703	3.12237	0.000458374	4.37835	3.16077e-07	10.0587	7.31571e-35	1.25597	0.39137	6.93628	2.28528e-26	5.68031	7.1975e-18
ENSMUSG00000042429.8	Adora1	5785	13.3982	0.686999	0.622682	0.71633	-4.30076	5.48251e-09	-4.44885	1.29559e-09	-4.23847	5.74758e-09	-0.148089	0.949178	0.0622871	0.958197	0.210376	0.88533
ENSMUSG00000026458.13	Ppfia4	6572	1.05157	1.50091	1.24628	0.506053	0.517363	0.372182	0.245569	0.691781	-1.0628	0.0354926	-0.271794	0.832022	-1.58016	0.00108516	-1.30837	0.0131975
ENSMUSG00000073557.12	Ppp1r12b	14983	33.2499	4.44013	2.67939	2.88778	-2.90552	5.89646e-15	-3.6359	4.87578e-23	-3.52673	6.91135e-22	-0.73037	0.324959	-0.621204	0.152635	0.109166	0.883232
ENSMUSG00000026429.9	Ube2t	4836	0.390177	0.77903	1.21363	1.04651	1.01201	0.00316857	1.66714	2.14546e-07	1.44802	6.33593e-06	0.655129	0.20755	0.436013	0.196674	-0.219116	0.631915
ENSMUSG00000031506.11	Ptpn7	6102	0.132683	1.19158	0.862098	1.08362	3.24091	1.20775e-05	2.76706	0.000216929	3.10306	2.09284e-05	-0.473853	0.792544	-0.137847	0.894202	0.336007	0.78429
ENSMUSG00000026424.8	Gpr37l1	2269	3.91404	0.508814	0.299982	0.0581209	-2.99059	0.00735781	-3.81323	0.000448174	-6.63326	4.25404e-09	-0.822638	0.76353	-3.64267	0.00257358	-2.82004	0.0385914
ENSMUSG00000003051.13	Elf3	2217	18.994	96.2657	95.0084	166.869	2.3427	3.03333e-06	2.32378	3.33718e-06	3.13641	1.11758e-10	-0.0189176	0.992861	0.793706	0.161505	0.812623	0.201719
ENSMUSG00000048096.7	Lmod1	3948	27.5258	6.12098	4.56291	0.717634	-2.17111	0.000196363	-2.59734	5.45657e-06	-5.28209	1.13367e-21	-0.426224	0.770401	-3.11098	1.37158e-08	-2.68475	2.31142e-06
ENSMUSG00000041889.7	Shisa4	2418	30.0014	11.4619	7.80308	2.77688	-1.38975	0.0244056	-1.94522	0.000930853	-3.44054	7.58459e-10	-0.555466	0.681128	-2.05079	0.000357652	-1.49532	0.0196569
ENSMUSG00000009418.16	Nav1	18814	5.17124	17.6256	12.9369	6.46587	1.76951	1.72571e-08	1.32321	3.44242e-05	0.322583	0.368024	-0.446295	0.508137	-1.44692	2.22629e-06	-1.00063	0.0028331
ENSMUSG00000026421.14	Csrp1	1956	576.358	211.234	194.006	133.055	-1.44825	2.25273e-08	-1.57103	9.25473e-10	-2.11509	4.25446e-17	-0.122779	0.865723	-0.66684	0.0151104	-0.544061	0.0789666
ENSMUSG00000041801.5	Phlda3	1559	12.7412	24.7671	31.1403	39.3338	0.960504	0.0204978	1.29161	0.00110446	1.62829	2.02615e-05	0.331103	0.72238	0.667786	0.118557	0.336683	0.562225
ENSMUSG00000041782.14	Lad1	3400	15.8521	39.838	50.4275	67.6673	1.33021	0.000539959	1.67049	8.1082e-06	2.09462	9.4143e-09	0.340278	0.702267	0.764406	0.0591231	0.424128	0.422986
ENSMUSG00000026413.12	Pkp1	5024	2.86769	27.4773	50.8238	106.303	3.26434	0.000644771	4.15187	8.169e-06	5.21657	8.9244e-09	0.887532	0.686221	1.95224	0.0516202	1.0647	0.417776
ENSMUSG00000041642.18	Kif21b	12184	0.543865	2.82833	2.37226	2.98288	2.38749	2.49104e-25	2.13312	2.14569e-20	2.46419	2.94784e-27	-0.254376	0.612866	0.0766966	0.809016	0.331072	0.26343
ENSMUSG00000087230.10	Mroh3	3230	0.23273	1.59923	1.35423	1.42995	2.86566	1.48314e-09	2.62326	3.42689e-08	2.69853	8.87867e-09	-0.242395	0.825091	-0.167133	0.766959	0.0752619	0.927747
ENSMUSG00000041605.16	Inava	4977	2.31051	12.7846	15.1346	20.9597	2.47324	2.56821e-11	2.71716	1.44711e-13	3.18665	1.6639e-18	0.243916	0.802203	0.713413	0.0821107	0.469497	0.361827
ENSMUSG00000041498.13	Kif14	10358	0.339117	2.02808	2.81533	2.45549	2.59516	1.06656e-11	3.07079	3.58173e-16	2.8724	2.09115e-14	0.47563	0.557316	0.277247	0.564343	-0.198383	0.757345
ENSMUSG00000026395.16	Ptprc	18313	0.740076	6.76518	4.5437	7.6103	3.19654	9.21517e-08	2.62182	1.46705e-05	3.36643	1.06865e-08	-0.574719	0.685571	0.169892	0.843797	0.744611	0.37041
ENSMUSG00000026394.5	Atp6v1g3	1887	7.56028	0.0553064	0.0228671	0.046201	-7.85102	2.73485e-32	-10.897	2.8307e-23	-8.31783	3.26375e-31	-3.04603	0.227807	-0.466816	0.748625	2.57922	0.149316
ENSMUSG00000033952.14	Aspm	11590	0.845885	3.57765	4.69454	4.30038	2.08535	3.67942e-08	2.47846	3.06496e-11	2.35147	2.44226e-10	0.393108	0.651191	0.266112	0.586553	-0.126996	0.858664
ENSMUSG00000026365.15	Cfh	8383	9.60362	26.1743	16.1261	10.5804	1.44701	0.0236325	0.747954	0.276295	0.139892	0.853704	-0.699055	0.59573	-1.30712	0.0400581	-0.608062	0.483214
ENSMUSG00000033849.3	B3galt2	9288	0.342591	1.38712	0.946782	0.273409	2.03268	0.0297406	1.47891	0.12331	-0.327013	0.761456	-0.553771	0.804402	-2.35969	0.00814933	-1.80592	0.0753777
ENSMUSG00000018189.12	Uchl5	2921	6.64382	7.17844	10.1225	14.1395	0.112099	0.677517	0.611198	0.00353705	1.09104	2.92791e-08	0.499099	0.126037	0.97894	2.4317e-07	0.479841	0.0318558
ENSMUSG00000026360.9	Rgs2	3627	37.5622	17.7926	18.4395	14.107	-1.07841	0.00645052	-1.02676	0.00912956	-1.41333	0.000167337	0.0516465	0.964868	-0.33492	0.476655	-0.386567	0.481044
ENSMUSG00000026358.13	Rgs1	6947	0.27023	1.09025	0.487187	1.23109	2.03945	0.00114493	0.865343	0.212904	2.21575	0.000264443	-1.17411	0.291766	0.176297	0.832995	1.3504	0.0469725
ENSMUSG00000035131.14	Brinp3	7003	0.194891	18.9393	16.1127	11.6948	6.65067	1.47121e-05	6.41744	2.79902e-05	5.95486	8.81253e-05	-0.233228	0.960484	-0.695811	0.735427	-0.462583	0.872675
ENSMUSG00000006010.14	Odr4	4100	18.0021	9.08656	8.27876	7.21623	-0.987475	9.31581e-12	-1.12349	5.08161e-15	-1.32134	1.32508e-20	-0.136017	0.702214	-0.33386	0.0365065	-0.197843	0.329785
ENSMUSG00000006014.16	Prg4	4280	0.100223	1.81414	2.84976	0.932	4.33674	1.50568e-05	4.99057	4.16042e-07	3.36801	0.000795761	0.653823	0.784344	-0.968731	0.392245	-1.62255	0.161127
ENSMUSG00000066842.18	Hmcn1	21191	0.810714	4.13058	2.29587	4.72805	2.35193	0.000101015	1.5041	0.0169931	2.54702	1.54932e-05	-0.847834	0.500134	0.19509	0.816452	1.04292	0.15768
ENSMUSG00000023150.14	Ivns1abp	5435	72.4097	43.2842	45.3968	31.9419	-0.7424	0.00895151	-0.673715	0.0176935	-1.181	8.41962e-06	0.0686841	0.932816	-0.438597	0.147357	-0.507281	0.12034
ENSMUSG00000052748.14	Swt1	12865	3.53604	1.52037	1.53723	2.25807	-1.21913	1.02075e-13	-1.20516	1.64743e-13	-0.648093	9.67892e-05	0.0139715	0.980444	0.571042	0.000734853	0.55707	0.00154561
ENSMUSG00000026483.13	Fam129a	7380	13.9874	16.1593	22.3284	44.2427	0.208316	0.739854	0.675164	0.198219	1.66172	0.000343402	0.466848	0.664951	1.45341	0.00196635	0.986559	0.06906
ENSMUSG00000043019.12	Edem3	6381	140.878	18.9575	18.7401	21.5203	-2.8941	1.06119e-56	-2.91044	2.08838e-57	-2.71117	4.8687e-50	-0.0163346	0.98036	0.182935	0.445878	0.199269	0.480834
ENSMUSG00000026482.13	Rgl1	6907	2.40789	11.424	7.12284	4.8125	2.24922	2.48841e-05	1.56669	0.00436408	1.00105	0.0748298	-0.682533	0.549412	-1.24817	0.0253949	-0.565637	0.457502
ENSMUSG00000008475.13	Arpc5	2276	35.7103	76.2061	74.8128	97.3641	1.09409	7.42009e-09	1.06761	1.54267e-08	1.44746	4.25236e-15	-0.026482	0.964817	0.353368	0.0928161	0.37985	0.0957001
ENSMUSG00000026480.12	Ncf2	8478	0.420282	4.00633	2.55465	4.73741	3.26864	4.30867e-08	2.61759	1.49108e-05	3.51079	2.14031e-09	-0.651045	0.626086	0.242155	0.767419	0.8932	0.246595
ENSMUSG00000026479.13	Lamc2	8039	6.59552	32.0684	43.0187	64.5058	2.28257	1.05512e-05	2.7065	1.07217e-07	3.29097	4.36779e-11	0.423931	0.737608	1.0084	0.0730987	0.584473	0.423149
ENSMUSG00000042684.8	Npl	2961	1.37719	2.09543	1.82428	0.487134	0.611197	0.468137	0.405449	0.636894	-1.52433	0.0333192	-0.205748	0.916552	-2.13553	0.00203128	-1.92978	0.00925749
ENSMUSG00000026475.7	Rgs16	2339	1.37878	9.53662	6.45959	5.00121	2.80683	2.26342e-06	2.24283	0.000198065	1.8741	0.00185433	-0.563991	0.680353	-0.932729	0.156823	-0.368738	0.703287
ENSMUSG00000066800.11	Rnasel	6641	2.26131	6.06757	3.84697	5.99734	1.42668	0.00787883	0.767337	0.180916	1.40935	0.00677368	-0.659344	0.547822	-0.0173285	0.984757	0.642015	0.356506
ENSMUSG00000026473.16	Glul	3782	651.07	91.0745	54.8152	46.112	-2.83783	1.76282e-11	-3.57064	9.04758e-18	-3.8199	2.2081e-20	-0.732812	0.396695	-0.982072	0.0329735	-0.24926	0.732612
ENSMUSG00000066797.6	Zfp648	1892	1.90061	0.0228066	0.0228066	0.0228066	-8.87494	4.64368e-13	-8.89625	3.36778e-13	-9.0725	7.61754e-14	0	1	0	1	0	1
ENSMUSG00000056708.5	Ier5	3276	3.21243	17.0615	14.7511	27.2495	2.41488	7.16135e-25	2.20497	6.51671e-21	3.09061	9.22926e-41	-0.209902	0.71227	0.675736	0.00527115	0.885639	0.000227901
ENSMUSG00000026471.14	Mr1	5981	5.98776	5.1947	3.83966	2.77275	-0.204484	0.0938479	-0.638858	3.72389e-09	-1.11034	1.43958e-25	-0.434375	0.00221959	-0.905856	1.14956e-19	-0.471481	2.3878e-05
ENSMUSG00000033722.9	BC034090	8222	0.9298	2.28641	1.8105	0.496485	1.30277	0.00964969	0.964487	0.0618215	-0.910816	0.0734254	-0.338279	0.778086	-2.21358	1.27108e-06	-1.8753	9.54637e-05
ENSMUSG00000050565.16	Tor1aip2	9218	13.4286	22.6827	26.207	32.1001	0.756437	0.00746186	0.965062	0.000405664	1.2575	1.82828e-06	0.208625	0.754982	0.501066	0.0889374	0.292442	0.446251
ENSMUSG00000026600.12	Soat1	9791	3.38661	15.4961	10.2428	11.0593	2.19543	4.03755e-05	1.5979	0.00356932	1.70872	0.00140491	-0.597529	0.611517	-0.486711	0.458654	0.110818	0.916253
ENSMUSG00000060519.11	Tor3a	3892	4.60217	9.54092	11.5367	15.4265	1.05428	5.45788e-05	1.32827	1.93776e-07	1.74734	2.17726e-12	0.273991	0.63494	0.693056	0.00833624	0.419065	0.190498
ENSMUSG00000033544.6	Angptl1	2841	0.0360466	1.46859	1.42932	0.0216684	6.10134	0.000605625	6.06281	0.000609761	-1.70887	0.4661	-0.0385365	0.995373	-7.81022	1.95486e-05	-7.77168	3.46669e-05
ENSMUSG00000070565.11	Rasal2	13740	1.90364	3.65377	3.45702	4.92413	0.941802	7.30616e-10	0.862131	1.79226e-08	1.37172	2.15915e-20	-0.079671	0.847769	0.429922	0.00558736	0.509593	0.00115603
ENSMUSG00000033488.11	Cryzl2	2534	1.3087	3.55477	2.40591	1.23852	1.45668	0.000112425	0.889187	0.0252063	-0.0734584	0.880945	-0.567492	0.432957	-1.53014	1.40304e-05	-0.962645	0.0168871
ENSMUSG00000026589.14	Sec16b	5410	1.48182	4.05435	2.75699	0.653339	1.45714	0.00030101	0.900285	0.0334282	-1.18934	0.0035626	-0.556854	0.499542	-2.64648	4.03125e-13	-2.08963	3.91984e-08
ENSMUSG00000073530.11	Pappa2	10294	3.9262	0.826261	0.293019	0.243317	-2.25486	0.0369803	-3.76726	0.000195202	-4.03418	4.68274e-05	-1.5124	0.465094	-1.77932	0.109174	-0.266917	0.891337
ENSMUSG00000026725.17	Tnn	5817	0.052338	2.62827	2.84129	0.158728	5.88277	4.63382e-06	5.99613	2.6371e-06	1.76908	0.210686	0.113368	0.977725	-4.11369	0.000742026	-4.22705	0.000759098
ENSMUSG00000014226.10	Cacybp	2390	9.44995	14.0861	19.3145	28.1061	0.577402	0.000693347	1.03506	1.3088e-10	1.57518	8.74413e-24	0.457659	0.063337	0.997777	2.01758e-11	0.540118	0.00111503
ENSMUSG00000026708.16	Cenpl	5695	0.754847	1.99099	2.14483	2.33463	1.4113	3.32048e-07	1.52317	2.54672e-08	1.64096	1.09497e-09	0.111874	0.882131	0.229663	0.480771	0.11779	0.800129
ENSMUSG00000026701.15	Prdx6	4804	204.498	62.4266	37.1147	48.2249	-1.71199	0.00330229	-2.46248	1.04656e-05	-2.08444	0.000186003	-0.750487	0.531208	-0.372447	0.608777	0.37804	0.676981
ENSMUSG00000026700.4	Tnfsf4	1842	0.0572888	1.4076	0.916723	0.103951	5.37296	1.39695e-06	4.73251	2.45495e-05	1.28316	0.32931	-0.640459	0.68134	-4.0898	2.06643e-08	-3.44935	6.41164e-06
ENSMUSG00000066755.2	Tnfsf18	2066	0.0525864	2.42137	2.14484	1.24738	6.3048	2.36172e-07	6.12559	4.85268e-07	5.33639	1.12274e-05	-0.179215	0.944895	-0.968415	0.336523	-0.7892	0.53082
ENSMUSG00000040297.12	Suco	8928	247.55	13.1004	12.7989	12.8795	-4.24058	3.01249e-51	-4.27409	3.68566e-52	-4.26537	4.97525e-52	-0.0335152	0.972236	-0.0247868	0.958063	0.00872842	0.990149
ENSMUSG00000026698.8	Pigc	4250	13.3922	3.8169	4.139	4.74208	-1.81352	1.37432e-13	-1.69552	4.30864e-12	-1.50164	7.39934e-10	0.117999	0.867085	0.311879	0.297366	0.19388	0.626472
ENSMUSG00000026697.10	Myoc	2074	7.43025	1.02327	0.418563	0.0375972	-2.88507	0.0457135	-4.23171	0.00199236	-8.76697	4.72499e-09	-1.34664	0.664894	-5.8819	0.000161016	-4.53526	0.00811964
ENSMUSG00000040181.14	Fmo1	6304	2.60416	1.80813	1.21317	7.44558	-0.528337	0.463772	-1.10519	0.0823463	1.51806	0.0107791	-0.576854	0.670642	2.0464	0.000392269	2.62325	4.17087e-06
ENSMUSG00000040170.13	Fmo2	5609	15.6623	3.72936	13.0088	43.0467	-2.07243	0.000817561	-0.267664	0.735188	1.45908	0.0189688	1.80476	0.0428979	3.5315	3.33728e-10	1.72674	0.00785076
ENSMUSG00000026691.10	Fmo3	2413	0.698238	0.0523199	0.0273758	1.45275	-4.30871	0.00166339	-6.31711	0.000101874	1.07661	0.433091	-2.0084	0.606864	5.38532	3.69632e-05	7.39373	6.33986e-06
ENSMUSG00000026586.16	Prrx1	11066	3.12427	19.8083	13.2405	1.75091	2.66602	2.81797e-06	2.08482	0.000313522	-0.836596	0.177131	-0.581204	0.658394	-3.50262	3.62878e-11	-2.92141	9.49362e-08
ENSMUSG00000041406.14	BC055324	4148	0.562718	1.92925	2.70033	2.46346	1.79823	1.58104e-05	2.28938	1.7125e-08	2.15421	9.38361e-08	0.491148	0.563284	0.355981	0.463692	-0.135167	0.853419
ENSMUSG00000026581.14	Sell	5911	0.0842914	1.39279	0.957627	5.41902	4.17399	1.19638e-09	3.62909	1.49185e-07	6.14048	2.90417e-20	-0.544901	0.713467	1.96649	0.00152004	2.5114	4.62481e-05
ENSMUSG00000026580.16	Selp	4413	0.462914	2.33696	1.93593	1.7798	2.36044	0.000642901	2.08554	0.00272341	1.9658	0.00417258	-0.274903	0.885281	-0.394641	0.649333	-0.119738	0.928987
ENSMUSG00000026579.8	F5	7430	0.256805	3.83304	1.33694	1.49248	3.92919	2.11593e-10	2.40589	0.000169711	2.5653	4.26632e-05	-1.5233	0.127488	-1.36389	0.0367193	0.159405	0.893931
ENSMUSG00000026576.12	Atp1b1	3081	136.351	76.9137	64.897	95.8427	-0.826073	0.0398867	-1.07126	0.00528261	-0.508622	0.207816	-0.245187	0.798767	0.317451	0.494134	0.562638	0.24008
ENSMUSG00000026573.7	Xcl1	523	0.663049	2.78043	1.45578	0.428035	2.21506	0.0454347	1.24267	0.294264	-0.740523	0.55223	-0.972391	0.658752	-2.95558	0.00404104	-1.98319	0.103603
ENSMUSG00000040848.11	Sft2d2	5702	80.4943	27.013	23.4209	31.6666	-1.57541	5.56506e-10	-1.78152	1.31628e-12	-1.34617	1.00446e-07	-0.206106	0.750042	0.229241	0.478984	0.435347	0.180308
ENSMUSG00000026566.15	Mpzl1	3550	9.03573	19.8475	30.3218	28.6745	1.13626	0.0239605	1.74825	0.000226808	1.6674	0.000374422	0.611987	0.543193	0.531135	0.341822	-0.080852	0.932987
ENSMUSG00000040723.14	Rcsd1	10131	0.906841	1.6092	1.10454	2.81294	0.830781	0.148209	0.283747	0.660349	1.63796	0.0012745	-0.547033	0.629332	0.807183	0.152798	1.35422	0.0139026
ENSMUSG00000000544.14	Gpa33	2742	0.285457	26.3612	20.6619	37.7073	6.61625	3.42303e-14	6.26472	6.84018e-13	7.13291	1.34461e-16	-0.351539	0.888026	0.516654	0.649094	0.868193	0.490759
ENSMUSG00000040612.13	Ildr2	8251	0.436729	5.9837	3.6223	3.10185	3.79232	1.83378e-15	3.06596	1.86317e-10	2.84342	2.94569e-09	-0.726358	0.462557	-0.948899	0.0690313	-0.222542	0.794204
ENSMUSG00000060568.14	Fam78b	6325	1.11962	2.39141	2.0548	0.948276	1.09929	0.0740011	0.878248	0.157856	-0.240648	0.724036	-0.22104	0.889508	-1.33994	0.0214945	-1.1189	0.0890226
ENSMUSG00000026558.13	Uck2	5464	13.2643	26.3629	28.9701	22.0368	0.991284	0.00871967	1.12769	0.00221941	0.732755	0.0514544	0.13641	0.894585	-0.258528	0.575026	-0.394938	0.43878
ENSMUSG00000026688.5	Mgst3	1097	17.0744	31.2511	23.959	52.861	0.873656	0.238668	0.489762	0.530021	1.63241	0.012534	-0.383893	0.819257	0.758754	0.311949	1.14265	0.142874
ENSMUSG00000026683.14	Nuf2	6341	0.42052	2.42395	2.87731	2.46221	2.5481	5.04521e-10	2.79821	5.16416e-12	2.57173	2.0396e-10	0.25011	0.809492	0.0236308	0.971174	-0.22648	0.735053
ENSMUSG00000026678.10	Rgs5	4546	6.63749	28.5634	22.2036	13.5771	2.10703	0.0221752	1.74357	0.0609145	1.03334	0.276508	-0.363465	0.883912	-1.07369	0.286912	-0.710227	0.589834
ENSMUSG00000038530.11	Rgs4	3098	0.943469	4.38827	3.54457	5.69482	2.23552	6.0765e-06	1.92492	0.000112622	2.61313	5.49138e-08	-0.310602	0.803339	0.37761	0.534081	0.688213	0.27528
ENSMUSG00000026675.12	Hsd17b7	5104	1.49826	3.61331	4.78521	9.36324	1.27446	0.0144233	1.68166	0.000754629	2.65012	2.56728e-08	0.4072	0.729306	1.37566	0.00560682	0.968456	0.0922659
ENSMUSG00000026674.9	Ddr2	9264	12.0895	14.2757	9.55215	6.2933	0.23986	0.74018	-0.340083	0.612667	-0.94227	0.0987646	-0.579943	0.631435	-1.18213	0.0388312	-0.602187	0.428058
ENSMUSG00000026667.14	Uhmk1	8101	12.4293	17.6865	17.8219	26.8229	0.509185	5.93156e-05	0.520275	3.60644e-05	1.11003	1.56944e-20	0.0110894	0.978919	0.600841	3.90683e-07	0.589752	1.02446e-06
ENSMUSG00000102418.1	Sh2d1b1	2544	0.265537	1.33799	0.937565	2.21523	2.4096	0.000490848	1.88645	0.00758238	3.14433	1.91349e-06	-0.523147	0.73024	0.734726	0.314852	1.25787	0.0874247
ENSMUSG00000102752.1	Gm7694	3827	5.71806	2.43832	1.77391	2.0565	-1.23408	7.46064e-06	-1.703	2.88948e-10	-1.47782	3.56098e-08	-0.468923	0.402395	-0.243747	0.4825	0.225176	0.602888
ENSMUSG00000038473.14	Nos1ap	7249	2.4347	1.11819	0.768109	0.83551	-1.12673	0.00128489	-1.68198	6.48554e-07	-1.54784	3.6747e-06	-0.555247	0.424182	-0.421106	0.296335	0.134142	0.833093
ENSMUSG00000038463.8	Olfml2b	3095	3.69166	28.6757	26.3198	8.41195	2.96275	1.86776e-19	2.83919	5.65077e-18	1.1923	0.000519814	-0.123562	0.897881	-1.77046	2.67954e-08	-1.64689	4.33414e-07
ENSMUSG00000026663.6	Atf6	9231	20.7857	10.6757	8.72397	9.6023	-0.961453	4.19834e-07	-1.25375	1.64999e-11	-1.11478	1.94391e-09	-0.292294	0.458184	-0.153322	0.528765	0.138972	0.649417
ENSMUSG00000026659.13	Dusp12	2743	6.29413	3.75455	3.66817	2.25532	-0.747824	9.71422e-06	-0.78621	2.774e-06	-1.48699	1.42842e-19	-0.0383858	0.940604	-0.739168	1.12524e-05	-0.700782	5.82727e-05
ENSMUSG00000070524.1	Fcrlb	1284	0.115666	1.0822	0.688971	0.756254	3.70552	9.7766e-05	3.02723	0.00181574	3.17205	0.000802429	-0.678294	0.652146	-0.533478	0.513728	0.144816	0.911691
ENSMUSG00000026656.15	Fcgr2b	5790	1.40677	18.1962	10.6182	5.18644	3.70054	1.07247e-08	2.92264	8.27813e-06	1.88837	0.00479105	-0.777905	0.590062	-1.81217	0.00707714	-1.03427	0.215572
ENSMUSG00000059089.4	Fcgr4	1256	0.421323	10.4022	8.46782	10.5691	4.76139	5.26343e-15	4.46115	2.4971e-13	4.78461	2.2246e-15	-0.300234	0.837363	0.023226	0.979882	0.32346	0.720429
ENSMUSG00000059498.13	Fcgr3	1736	2.05958	40.4142	24.9418	35.5847	4.31192	4.50997e-12	3.61461	8.16971e-09	4.12819	2.34262e-11	-0.697313	0.622137	-0.183726	0.837092	0.513586	0.595745
ENSMUSG00000026649.14	Cfap126	1774	0.537876	0.507932	0.58039	1.56842	-0.081258	0.931097	0.121766	0.888807	1.59322	0.0109565	0.203024	0.908264	1.67448	0.00605515	1.47145	0.0257725
ENSMUSG00000056569.11	Mpz	2111	4.62476	0.301768	0.293229	0.22771	-4.03142	1.71536e-08	-4.08701	9.54016e-09	-4.46748	2.73952e-10	-0.0555903	0.982692	-0.436061	0.668377	-0.38047	0.777487
ENSMUSG00000038370.6	Pcp4l1	1577	25.5292	4.22433	2.43554	4.56378	-2.60325	0.00749024	-3.40857	0.000283018	-2.49071	0.00847386	-0.805323	0.718616	0.112539	0.938136	0.917862	0.500245
ENSMUSG00000058715.11	Fcer1g	874	4.27792	55.393	34.5698	44.281	3.71054	4.42516e-11	3.02893	9.87038e-08	3.3873	1.38347e-09	-0.68161	0.585222	-0.323232	0.666437	0.358379	0.701701
ENSMUSG00000006403.13	Adamts4	4810	0.469811	16.8037	16.5492	7.1591	5.19283	2.54151e-33	5.17093	4.46719e-33	3.96123	7.67433e-20	-0.0219037	0.988487	-1.2316	0.00518198	-1.2097	0.00937228
ENSMUSG00000062729.11	Ppox	4515	9.0184	4.90997	4.4426	4.12804	-0.878583	1.21823e-05	-1.02579	2.19593e-07	-1.1305	6.34955e-09	-0.147207	0.774051	-0.251921	0.286176	-0.104715	0.763697
ENSMUSG00000045259.4	Klhdc9	1558	1.2321	0.224956	0.120743	0.135377	-2.60615	2.06359e-06	-3.7279	1.45936e-09	-3.46942	1.64394e-09	-1.12175	0.430464	-0.863264	0.266802	0.258483	0.853144
ENSMUSG00000006411.12	Nectin4	3746	7.78333	11.1644	9.28511	23.583	0.521157	0.53023	0.254839	0.770177	1.60058	0.0182153	-0.266318	0.888385	1.07943	0.142655	1.34574	0.0824284
ENSMUSG00000048865.16	Arhgap30	8591	0.677592	4.87005	3.08528	3.82766	2.85505	2.05006e-06	2.19488	0.000337369	2.50722	2.6242e-05	-0.66017	0.62262	-0.347828	0.659735	0.312342	0.76198
ENSMUSG00000103711.1	Tstd1	867	4.06262	1.51154	1.78387	1.55443	-1.45012	2.08092e-05	-1.22585	0.000299794	-1.41534	1.83795e-05	0.224276	0.807108	0.0347784	0.950079	-0.189498	0.747838
ENSMUSG00000004709.14	Cd244a	4876	0.223111	1.22662	0.890704	1.66745	2.50045	2.2421e-05	2.0319	0.000701358	2.94706	2.58767e-07	-0.468551	0.725182	0.446614	0.518678	0.915164	0.184222
ENSMUSG00000004707.14	Ly9	3307	0.213979	2.91935	1.59799	1.56116	3.86058	2.10238e-09	2.98242	5.29445e-06	2.95257	4.99179e-06	-0.878156	0.486642	-0.908004	0.183068	-0.0298477	0.983258
ENSMUSG00000038179.13	Slamf7	4577	0.602299	2.36691	1.20815	1.28556	1.99248	0.00952342	1.01585	0.220193	1.10734	0.159624	-0.976636	0.523841	-0.885149	0.295085	0.0914867	0.952396
ENSMUSG00000015355.13	Cd48	1189	1.11671	8.60916	4.72743	4.99155	2.9911	1.26351e-05	2.11858	0.00266388	2.20077	0.00141306	-0.87252	0.537262	-0.790333	0.308546	0.0821866	0.953314
ENSMUSG00000038147.13	Cd84	6272	0.452361	6.59691	3.66818	5.4795	3.8873	1.82993e-08	3.0387	1.44788e-05	3.61926	1.22425e-07	-0.8486	0.573883	-0.268037	0.77845	0.580563	0.581459
ENSMUSG00000026556.15	Vangl2	6990	1.68665	3.46596	5.05446	4.55112	1.04166	0.0217661	1.58785	0.000208189	1.43546	0.000729711	0.546184	0.546749	0.393799	0.447415	-0.152385	0.846063
ENSMUSG00000007122.11	Casq1	1951	6.34965	0.157832	0.180575	0.149092	-5.53235	2.84786e-53	-5.35444	7.28181e-55	-5.62783	5.35582e-58	0.177908	0.90285	-0.0954802	0.90124	-0.273388	0.746293
ENSMUSG00000038034.15	Igsf8	5217	4.3785	9.55681	10.7308	9.29357	1.12764	8.58012e-06	1.29605	2.05171e-07	1.08771	1.28976e-05	0.168405	0.794958	-0.0399367	0.916669	-0.208342	0.585779
ENSMUSG00000007097.14	Atp1a2	7038	5.91922	0.512948	0.375532	2.59296	-3.54406	2.42895e-09	-3.99936	1.15998e-11	-1.19246	0.0589657	-0.455301	0.77061	2.3516	7.69022e-05	2.8069	2.34469e-06
ENSMUSG00000026548.4	Slamf9	1313	2.39969	11.4894	5.91345	3.83344	2.27645	4.5338e-06	1.31211	0.0120663	0.686293	0.208114	-0.964338	0.286695	-1.59015	0.00112397	-0.625817	0.347189
ENSMUSG00000037995.15	Igsf9	6612	3.5367	8.02916	5.94675	6.60928	1.18449	0.00116053	0.749859	0.0493279	0.90347	0.0130997	-0.434627	0.572501	-0.281016	0.529626	0.153611	0.808455
ENSMUSG00000026547.15	Tagln2	2082	47.0201	136.328	163.754	201.134	1.53619	7.03864e-09	1.80085	5.95386e-12	2.09737	4.80115e-16	0.264662	0.673089	0.561181	0.052795	0.296519	0.439435
ENSMUSG00000026546.16	Cfap45	5717	0.0894522	0.693341	0.937716	1.34311	3.06198	1.92142e-08	3.50731	6.302e-11	4.02451	2.49842e-14	0.445328	0.672911	0.962535	0.045669	0.517207	0.410254
ENSMUSG00000053318.7	Slamf8	3079	0.269467	1.18839	0.655841	0.325061	2.20611	0.00243578	1.33346	0.0836769	0.293388	0.737268	-0.872655	0.542613	-1.91272	0.00578146	-1.04007	0.236505
ENSMUSG00000026544.6	Dusp23	1410	6.86645	4.84022	3.34328	2.4505	-0.505825	0.0109633	-1.05791	2.10306e-08	-1.50178	1.01238e-15	-0.552081	0.057873	-0.995956	8.04902e-08	-0.443875	0.0557227
ENSMUSG00000005338.13	Cadm3	7248	1.08402	1.17199	1.34305	0.0968883	0.11352	0.924167	0.308796	0.771556	-3.56403	1.03223e-05	0.195276	0.935471	-3.67755	3.35479e-06	-3.87283	1.27869e-06
ENSMUSG00000037860.15	Aim2	3501	0.600358	5.15706	2.2896	6.8034	3.12876	1.69852e-06	1.95194	0.00411185	3.52961	3.23279e-08	-1.17682	0.347035	0.400853	0.630767	1.57767	0.0279464
ENSMUSG00000037849.8	Ifi206	3054	0.14951	2.22898	3.18864	2.57804	4.04276	2.53487e-18	4.55918	2.82644e-23	4.25446	1.69456e-20	0.516415	0.447569	0.211702	0.627819	-0.304713	0.538948
ENSMUSG00000073491.11	Ifi213	6840	0.165948	1.35107	1.93682	1.0136	3.0779	6.76768e-11	3.59666	1.04642e-14	2.66092	1.49533e-08	0.518763	0.588901	-0.416977	0.437529	-0.93574	0.0650689
ENSMUSG00000043263.13	Ifi209	3547	0.352734	4.57512	5.31521	6.4841	3.75218	4.00957e-18	3.96702	2.98104e-20	4.2556	2.14085e-23	0.214843	0.843668	0.503426	0.284889	0.288583	0.651599
ENSMUSG00000066677.12	Ifi208	5258	0.0712425	0.587805	0.634182	1.46904	3.20824	3.61988e-05	3.31245	1.72723e-05	4.54117	1.04445e-09	0.104206	0.960149	1.33293	0.0656875	1.22872	0.130881
ENSMUSG00000073490.11	Ifi207	3422	1.22845	10.9637	11.1849	10.0308	3.17262	8.29538e-20	3.20013	3.28822e-20	3.04377	1.68209e-18	0.0275081	0.981307	-0.128853	0.789418	-0.156361	0.800502
ENSMUSG00000073489.6	Ifi204	3561	0.743885	9.4679	13.1474	14.3056	3.69657	2.85911e-38	4.17023	7.76003e-49	4.29259	6.94555e-52	0.473668	0.371999	0.596028	0.0374973	0.12236	0.797851
ENSMUSG00000090272.9	Mndal	3591	1.39712	8.26983	9.64415	8.10451	2.57731	6.38784e-25	2.7981	2.19575e-29	2.54715	1.2146e-24	0.220783	0.703055	-0.0301678	0.936578	-0.25095	0.476987
ENSMUSG00000026536.9	Ifi211	1785	0.648648	9.32367	12.6038	10.4254	3.90382	5.91768e-43	4.34126	2.05193e-53	4.06693	5.54152e-47	0.437444	0.26705	0.16311	0.552216	-0.274334	0.345658
ENSMUSG00000039997.16	Ifi203	6706	1.01944	6.30425	6.86946	4.91624	2.63562	1.65169e-18	2.75855	2.87556e-20	2.27668	3.33481e-14	0.122924	0.888026	-0.358938	0.314383	-0.481862	0.209323
ENSMUSG00000026535.9	Ifi202b	1697	0.179802	2.00665	6.54563	26.3849	3.69207	0.0393593	5.41132	0.00135509	7.42641	4.57852e-06	1.71925	0.63282	3.73434	0.0263147	2.01509	0.35427
ENSMUSG00000054203.7	Ifi205	4177	0.529431	2.43178	2.77291	1.87192	2.2223	1.03303e-15	2.40824	1.86639e-18	1.84063	3.29281e-11	0.185936	0.768559	-0.381676	0.178756	-0.567612	0.0469047
ENSMUSG00000050069.3	Grem2	3745	0.787023	4.21482	2.29461	4.81399	2.43805	0.000314678	1.55664	0.027763	2.63063	6.36369e-05	-0.881408	0.527973	0.192583	0.835267	1.07399	0.191896
ENSMUSG00000039783.15	Kmo	4724	0.244954	1.28848	0.84284	0.495065	2.44205	0.000527732	1.82044	0.0118246	1.04759	0.161606	-0.621611	0.689628	-1.39446	0.0506968	-0.772851	0.407853
ENSMUSG00000078185.3	Chml	6975	1.69422	2.99362	3.54281	5.09103	0.826087	4.57684e-06	1.07098	1.07034e-09	1.59304	9.1157e-21	0.244892	0.500134	0.766956	3.02557e-06	0.522063	0.00378625
ENSMUSG00000039748.11	Exo1	8422	0.543172	1.05234	1.89249	1.94211	0.961401	0.00531345	1.81454	1.6007e-08	1.85026	5.67054e-09	0.85314	0.0826659	0.888862	0.00604303	0.0357213	0.95693
ENSMUSG00000057335.11	Cep170	18049	1.51374	5.94677	5.23017	3.64034	1.97553	5.31758e-11	1.7903	2.89667e-09	1.26743	3.2687e-05	-0.185233	0.819074	-0.708102	0.0289268	-0.522869	0.171062
ENSMUSG00000015961.8	Adss	4531	11.5284	18.1941	18.8388	23.125	0.658781	0.000948231	0.709064	0.000306815	1.00479	1.03252e-07	0.0502832	0.931042	0.346009	0.102997	0.295726	0.232349
ENSMUSG00000026495.8	Efcab2	4151	1.50157	0.515966	0.498406	0.52371	-1.56213	2.15236e-06	-1.61914	7.93398e-07	-1.53727	1.7963e-06	-0.0570093	0.957771	0.0248585	0.963415	0.0818677	0.901587
ENSMUSG00000026494.12	Kif26b	14696	1.35475	13.2884	14.4428	3.1371	3.2972	3.79134e-18	3.41753	1.71222e-19	1.21365	0.00240008	0.12033	0.915715	-2.08355	1.80046e-08	-2.20388	2.84304e-09
ENSMUSG00000038949.8	Cnst	8859	5.57913	2.93784	2.74753	4.08437	-0.926297	9.60979e-06	-1.0243	7.37454e-07	-0.451044	0.0377566	-0.0979993	0.865723	0.475254	0.0320183	0.573253	0.011835
ENSMUSG00000026489.13	Coq8a	5293	4.92159	1.97852	0.867606	0.445516	-1.31922	0.00719931	-2.51665	5.25871e-08	-3.49229	1.7785e-14	-1.19743	0.115215	-2.17307	2.14551e-06	-0.975638	0.0868694
ENSMUSG00000010609.15	Psen2	4332	8.27997	3.98008	2.9785	3.05644	-1.0583	0.000186242	-1.48073	7.40838e-08	-1.43919	1.25484e-07	-0.42243	0.467676	-0.380885	0.240492	0.0415449	0.94363
ENSMUSG00000038855.10	Itpkb	10463	20.6122	8.67963	7.21366	10.8609	-1.24824	0.000507387	-1.51552	1.53867e-05	-0.924545	0.0101147	-0.267276	0.763135	0.323698	0.456531	0.590973	0.178421
ENSMUSG00000053963.7	Stum	7375	2.8724	0.237298	0.0989755	0.0883043	-3.6321	2.169e-08	-4.96097	2.87291e-14	-5.11534	2.69302e-15	-1.32887	0.313307	-1.48324	0.0451203	-0.154372	0.912627
ENSMUSG00000058729.13	Lin9	7244	0.592494	1.54046	2.11527	2.32675	1.38864	4.16326e-09	1.85149	8.99276e-16	1.98655	2.81053e-18	0.462844	0.243691	0.597914	0.00793348	0.13507	0.707539
ENSMUSG00000060743.12	H3f3a	3504	30.7599	47.3526	50.4076	62.2652	0.62268	0.012947	0.713122	0.00343209	1.01763	1.21334e-05	0.090442	0.894421	0.394954	0.133866	0.304512	0.341967
ENSMUSG00000026520.8	Pycr2	2958	15.6228	7.02088	6.8026	7.35884	-1.15613	1.94117e-22	-1.20134	3.42039e-24	-1.08547	2.426e-20	-0.0452166	0.901458	0.0706583	0.670749	0.115875	0.535943
ENSMUSG00000038793.8	Lefty1	1758	0.608031	1.19401	0.735507	0.554137	1.00359	0.0604589	0.266714	0.674143	-0.139817	0.823215	-0.736873	0.428631	-1.1434	0.0193739	-0.406531	0.575408
ENSMUSG00000038776.13	Ephx1	1950	82.6006	13.7853	8.55355	13.0621	-2.58481	6.84483e-06	-3.27638	5.84264e-09	-2.66269	2.30393e-06	-0.691572	0.586537	-0.0778832	0.930236	0.613688	0.459257
ENSMUSG00000004880.11	Lbr	4761	6.72763	10.5164	12.3907	15.8795	0.645019	0.00381217	0.883038	3.76283e-05	1.2404	2.02302e-09	0.238018	0.61264	0.595386	0.00604594	0.357367	0.175203
ENSMUSG00000026511.7	Srp9	5541	15.0422	7.87532	7.8777	6.9817	-0.934376	1.72053e-17	-0.934172	1.53841e-17	-1.10965	1.28146e-24	0.000204305	1	-0.175272	0.178693	-0.175476	0.236497
ENSMUSG00000038633.5	Degs1	2591	58.0347	29.0835	21.3185	22.7544	-0.997172	3.54051e-08	-1.44562	3.04035e-16	-1.35156	1.72065e-14	-0.448453	0.139814	-0.354393	0.0777984	0.0940598	0.76877
ENSMUSG00000026509.15	Capn2	6345	7.95125	31.689	29.5303	27.4301	1.99568	1.34851e-09	1.89385	8.36208e-09	1.78745	4.52741e-08	-0.101832	0.916666	-0.208229	0.634276	-0.106397	0.866859
ENSMUSG00000038599.14	Capn8	3770	0.495897	2.17068	0.592516	0.0573084	2.15658	0.0661642	0.256439	0.862255	-3.39004	0.0028628	-1.90014	0.360404	-5.54662	1.96371e-07	-3.64648	0.00195039
ENSMUSG00000038576.15	Susd4	3858	3.13205	1.10923	0.616163	1.20047	-1.50602	0.0530203	-2.36803	0.00120872	-1.39058	0.0633967	-0.862016	0.586653	0.115438	0.915615	0.977454	0.308944
ENSMUSG00000079164.8	Tlr5	4790	2.94628	3.38769	1.6956	1.40045	0.202074	0.806869	-0.80454	0.236547	-1.07904	0.0882064	-1.00661	0.396695	-1.28112	0.0446469	-0.274503	0.795944
ENSMUSG00000030768.12	Disp1	5224	1.45909	3.14877	2.94556	1.83126	1.11648	1.86456e-05	1.0202	9.73963e-05	0.333164	0.245522	-0.0962746	0.894421	-0.783315	0.00217876	-0.68704	0.0129475
ENSMUSG00000056050.13	Mia3	7196	41.8174	26.0683	23.9678	17.2049	-0.682039	0.00016938	-0.803282	6.30554e-06	-1.28182	8.25709e-14	-0.121243	0.793433	-0.599778	0.000810814	-0.478535	0.0148577
ENSMUSG00000072258.10	Taf1a	2409	8.47308	3.78754	4.13466	3.93669	-1.1657	7.51946e-12	-1.04695	7.05067e-10	-1.10786	3.696e-11	0.118749	0.796475	0.0578398	0.816682	-0.0609089	0.853573
ENSMUSG00000039384.8	Dusp10	3042	1.85444	6.87827	5.59361	14.0764	1.89989	0.00167631	1.6007	0.00882341	2.93437	2.79832e-07	-0.299187	0.850393	1.03448	0.105661	1.33367	0.0435713
ENSMUSG00000039377.7	Hlx	2278	0.977438	5.945	3.75956	5.46711	2.62727	2.32436e-08	1.96213	4.38367e-05	2.50686	7.08831e-08	-0.665138	0.488335	-0.120404	0.85382	0.544734	0.391858
ENSMUSG00000073481.9	Mtarc2	6629	20.3521	8.29461	6.64895	6.5659	-1.29534	3.62272e-11	-1.61508	6.24278e-17	-1.63384	1.74146e-17	-0.319741	0.432054	-0.338495	0.132868	-0.0187536	0.965519
ENSMUSG00000039349.5	C130074G19Rik	3035	20.645	13.9829	7.13966	7.24558	-0.562481	0.317884	-1.53461	0.00159666	-1.51182	0.00156074	-0.972128	0.264864	-0.949343	0.0649401	0.0227844	0.983951
ENSMUSG00000026620.11	Mark1	4356	3.91968	6.26095	4.55649	2.1833	0.677189	0.148925	0.216366	0.683778	-0.845479	0.0519917	-0.460823	0.613957	-1.52267	0.000188369	-1.06185	0.0206286
ENSMUSG00000039239.14	Tgfb2	5791	6.74449	8.86766	10.5659	3.65231	0.395093	0.552632	0.648334	0.283138	-0.886038	0.113479	0.253242	0.861095	-1.28113	0.0197363	-1.53437	0.00625859
ENSMUSG00000026610.13	Esrrg	6208	3.2201	1.54443	0.73691	0.185763	-1.06309	0.23482	-2.14168	0.00768194	-4.17013	4.10956e-08	-1.0786	0.511673	-3.10705	5.02828e-05	-2.02845	0.0197817
ENSMUSG00000037624.15	Kcnk2	4943	1.70026	0.975759	0.381743	1.1251	-0.806783	0.330303	-2.19002	0.00236517	-0.599146	0.448665	-1.38323	0.296228	0.207637	0.833043	1.59087	0.047836
ENSMUSG00000026605.14	Cenpf	15433	1.20854	4.06982	5.94096	5.60913	1.75405	1.53082e-08	2.30069	3.77642e-14	2.21752	2.2609e-13	0.546632	0.372857	0.463468	0.19171	-0.083164	0.89054
ENSMUSG00000037568.12	Vash2	4314	3.57412	2.44415	2.82575	0.618204	-0.55036	0.403897	-0.338712	0.618646	-2.54942	2.0939e-06	0.211648	0.892991	-1.99906	0.000230729	-2.21071	5.74036e-05
ENSMUSG00000026632.17	Tatdn3	2786	3.32716	1.77951	1.42518	1.07839	-0.907271	0.000156809	-1.24096	1.40795e-07	-1.63848	1.79345e-12	-0.333684	0.51919	-0.731207	0.0034221	-0.397523	0.20786
ENSMUSG00000062510.12	Nsl1	5303	0.31654	1.18866	1.62929	1.27475	1.93421	1.41048e-06	2.39741	9.36504e-10	2.0388	2.02829e-07	0.463202	0.561214	0.104595	0.842349	-0.358607	0.50533
ENSMUSG00000026630.9	Batf3	1597	1.06171	0.7962	0.709089	0.438948	-0.424798	0.604313	-0.611364	0.418653	-1.32343	0.0499229	-0.186566	0.919806	-0.898637	0.225115	-0.712071	0.43894
ENSMUSG00000026627.7	Pacc1	2246	3.08339	4.90727	6.26545	5.90818	0.67475	0.040101	1.02933	0.000830474	0.944237	0.00194076	0.354583	0.585467	0.269486	0.460276	-0.0850969	0.879353
ENSMUSG00000037474.13	Dtl	13709	0.292931	1.51052	2.36462	2.2304	2.37999	4.07358e-13	3.02937	6.06791e-21	2.9438	5.66469e-20	0.649377	0.273201	0.563812	0.11212	-0.0855654	0.890296
ENSMUSG00000026622.15	Nek2	4516	0.374669	1.23222	1.89767	1.78282	1.74531	5.23969e-05	2.37678	1.24288e-08	2.28326	3.58226e-08	0.631463	0.428487	0.537947	0.239452	-0.0935161	0.902294
ENSMUSG00000058248.12	Kcnh1	7331	0.333528	0.630258	0.535194	1.12853	0.929888	0.20723	0.687722	0.358974	1.77757	0.00613791	-0.242166	0.894316	0.847686	0.241514	1.08985	0.160624
ENSMUSG00000037375.16	Hhat	9150	0.354159	1.30687	1.05555	0.566994	1.90351	1.01393e-22	1.59271	5.23793e-16	0.697664	0.000847846	-0.310809	0.347035	-1.20585	4.27607e-14	-0.895041	1.25183e-07
ENSMUSG00000016262.14	Sertad4	3850	3.51709	12.4466	9.22532	2.36025	1.8262	7.96382e-12	1.39372	2.6522e-07	-0.57594	0.0476102	-0.432478	0.426526	-2.40214	7.94194e-23	-1.96966	3.39266e-15
ENSMUSG00000026638.15	Irf6	7069	15.5166	18.193	25.1542	41.4847	0.229675	0.700056	0.697288	0.161684	1.4191	0.00158524	0.467613	0.645714	1.18942	0.00986502	0.721807	0.200571
ENSMUSG00000026639.18	Lamb3	6612	3.51879	20.187	21.7989	34.147	2.52269	2.84216e-08	2.63372	5.37136e-09	3.28122	1.29637e-13	0.111035	0.936336	0.758533	0.140599	0.647498	0.28749
ENSMUSG00000016194.14	Hsd11b1	4251	1.33348	5.33446	2.87168	8.15741	2.0092	0.00334329	1.11254	0.126979	2.62279	5.69546e-05	-0.896657	0.520227	0.613594	0.445632	1.51025	0.0426036
ENSMUSG00000009633.3	G0s2	871	14.4721	5.35116	4.0279	15.3399	-1.44483	0.0971905	-1.85608	0.0252641	0.0843731	0.935114	-0.411247	0.847749	1.52921	0.0716312	1.94045	0.0265477
ENSMUSG00000026640.12	Plxna2	17174	6.57426	3.48156	2.62067	4.47831	-0.917829	2.5155e-05	-1.32824	3.4562e-10	-0.554278	0.0126848	-0.410412	0.328126	0.363551	0.133688	0.773963	0.000505081
ENSMUSG00000016494.9	Cd34	7290	3.9656	9.15719	6.97606	10.9072	1.2086	0.000611339	0.815741	0.0258312	1.46136	1.68698e-05	-0.392859	0.6036	0.252757	0.565818	0.645616	0.120122
ENSMUSG00000026616.16	Cr2	8145	4.88517	0.0345596	0.0782454	0.250021	-7.40486	6.41715e-20	-6.07178	5.02511e-15	-4.31681	1.51257e-08	1.33308	0.465111	3.08805	0.000305814	1.75497	0.0650617
ENSMUSG00000049950.6	Rpp38	1042	2.70095	3.6516	4.878	6.11511	0.443771	0.167168	0.869492	0.00236658	1.18986	1.1596e-05	0.425721	0.417583	0.746091	0.00453127	0.32037	0.354367
ENSMUSG00000026644.7	Acbd7	534	4.82571	0.138438	0.139512	0.183251	-6.36053	3.55873e-07	-6.38478	2.77063e-07	-5.54694	1.45516e-07	-0.0242453	0.997364	0.813596	0.679923	0.837842	0.737253
ENSMUSG00000026646.16	Suv39h2	4410	0.187985	0.837654	1.63583	2.01445	2.21938	5.02025e-07	3.20122	5.81988e-14	3.49914	9.50429e-17	0.981843	0.0929158	1.27977	0.000521938	0.297923	0.594987
ENSMUSG00000026655.15	Fam107b	4329	3.59501	12.8704	12.3445	22.226	1.84345	1.60358e-13	1.78411	8.43697e-13	2.63204	3.73673e-27	-0.0593372	0.937883	0.788593	0.00195623	0.84793	0.00116017
ENSMUSG00000026657.17	Frmd4a	23468	1.02234	2.49703	2.65688	2.43803	1.28998	0.000247541	1.37962	7.25626e-05	1.25563	0.000275508	0.0896428	0.931195	-0.0343529	0.949596	-0.123996	0.847064
ENSMUSG00000048186.14	Bend7	4194	3.28941	1.4669	1.63754	3.5654	-1.16976	0.0739223	-1.01114	0.122029	0.117169	0.877927	0.158619	0.929285	1.28693	0.0418336	1.12831	0.113533
ENSMUSG00000026664.7	Phyh	1893	127.932	32.2765	21.4029	19.4139	-1.98775	3.47929e-06	-2.58089	7.35155e-10	-2.722	5.29442e-11	-0.593142	0.517729	-0.734256	0.125738	-0.141114	0.862943
ENSMUSG00000026669.14	Mcm10	7692	0.238589	1.25057	2.30014	2.51391	2.4143	1.34236e-11	3.29958	2.93762e-21	3.42639	4.53492e-23	0.885277	0.0833563	1.01209	0.00230428	0.126816	0.832738
ENSMUSG00000039145.16	Camk1d	7427	3.32168	9.43071	7.38547	4.49656	1.50717	0.0313936	1.15373	0.106005	0.437555	0.564963	-0.353441	0.840473	-1.06961	0.141253	-0.716171	0.438099
ENSMUSG00000025815.13	Dhtkd1	6333	5.70572	0.406634	0.27949	0.137827	-3.83525	2.07878e-37	-4.39382	7.13187e-47	-5.44138	1.72445e-64	-0.558576	0.419605	-1.60613	4.60821e-06	-1.04755	0.00909793
ENSMUSG00000039063.5	Echdc3	2685	1.80269	0.445228	0.305321	0.482748	-2.05403	9.16989e-05	-2.66143	3.62295e-07	-1.93593	0.00015766	-0.607395	0.622368	0.118099	0.880327	0.725494	0.323844
ENSMUSG00000015619.10	Gata3	3978	107.198	22.2566	24.0973	28.3484	-2.26851	1.79181e-05	-2.15386	4.61235e-05	-1.91948	0.000260649	0.114642	0.943524	0.349025	0.610151	0.234382	0.803569
ENSMUSG00000025783.2	4930412O13Rik	1381	38.3884	5.48916	3.28237	1.1208	-2.81304	0.00021696	-3.56398	1.62247e-06	-5.14298	1.56508e-12	-0.750937	0.668813	-2.32994	0.00249387	-1.57901	0.0778803
ENSMUSG00000037254.18	Itih2	3315	0.993923	2.68896	0.749229	0.308891	1.44896	0.0456465	-0.423912	0.61454	-1.72824	0.013495	-1.87288	0.0639514	-3.17721	8.26126e-07	-1.30433	0.112196
ENSMUSG00000025780.7	Itih5	7900	14.2468	3.99365	1.98103	1.28986	-1.83648	0.0001454	-2.8514	9.40373e-10	-3.47196	3.9503e-14	-1.01493	0.239002	-1.63549	0.000633228	-0.620559	0.342256
ENSMUSG00000026778.13	Prkcq	7081	1.52997	0.280509	0.202375	0.568085	-2.47111	0.00140356	-2.9602	9.63867e-05	-1.43838	0.067536	-0.489097	0.805342	1.03273	0.235555	1.52183	0.0908202
ENSMUSG00000026773.19	Pfkfb3	7561	482.323	12.3817	12.469	15.1734	-5.28453	8.50289e-53	-5.274	1.04458e-52	-4.99088	2.73625e-47	0.0105327	0.994688	0.293644	0.529025	0.283111	0.622872
ENSMUSG00000023206.16	Il15ra	4446	5.81828	3.43147	2.26993	1.50693	-0.763812	0.171801	-1.36276	0.00752787	-1.95527	5.72717e-05	-0.598945	0.577286	-1.19146	0.020984	-0.592512	0.38556
ENSMUSG00000047909.11	Ankrd16	5926	5.80902	4.53687	3.57306	2.83357	-0.35715	0.200061	-0.705021	0.00500117	-1.03885	1.40132e-05	-0.34787	0.495629	-0.6817	0.00616299	-0.33383	0.303806
ENSMUSG00000026768.10	Itga8	7368	5.23227	1.16457	0.668844	9.04796	-2.17338	0.00146574	-2.98228	6.50482e-06	0.790916	0.278336	-0.808908	0.58094	2.96429	3.28479e-06	3.7732	1.79674e-09
ENSMUSG00000026767.12	Mindy3	6294	3.34902	4.882	5.42329	10.4777	0.54476	0.25263	0.696777	0.121406	1.64718	4.29074e-05	0.152017	0.895762	1.10242	0.00835282	0.950402	0.0389962
ENSMUSG00000026728.9	Vim	4743	19.4915	155.685	106.809	75.0313	2.99832	1.22484e-11	2.45469	3.70608e-08	1.9452	1.38825e-05	-0.543632	0.586722	-1.05313	0.0282814	-0.509493	0.42804
ENSMUSG00000003418.11	St8sia6	7664	0.22227	1.15052	0.629127	0.476642	2.40334	0.00182039	1.52691	0.058707	1.12315	0.164872	-0.876434	0.586332	-1.28019	0.114175	-0.403758	0.745566
ENSMUSG00000026712.3	Mrc1	6371	2.43865	33.4662	18.9211	10.0753	3.78228	5.36627e-06	2.95917	0.000463401	2.04976	0.0168624	-0.823106	0.670547	-1.73252	0.0525972	-0.909418	0.443454
ENSMUSG00000057914.15	Cacnb2	13228	1.60199	0.466924	0.317484	0.246547	-1.78577	0.0393262	-2.35232	0.00449089	-2.71569	0.000719401	-0.566555	0.782713	-0.929921	0.330001	-0.363367	0.800129
ENSMUSG00000053702.16	Nebl	15235	0.451587	0.713584	1.066	4.67431	0.66383	0.302732	1.24466	0.0316995	3.3799	1.09912e-10	0.580831	0.633398	2.71607	9.98863e-08	2.13524	7.4987e-05
ENSMUSG00000054057.2	A930004D18Rik	3378	0.630002	1.6717	1.90381	1.99222	1.42452	3.26883e-05	1.62016	1.5302e-06	1.68268	3.8215e-07	0.195645	0.810392	0.258158	0.508971	0.0625129	0.919218
ENSMUSG00000026737.12	Pip4k2a	3477	2.89147	12.4401	10.4968	8.14455	2.11076	3.81276e-13	1.86471	1.62728e-10	1.49934	3.0369e-07	-0.246059	0.728774	-0.611427	0.05207	-0.365369	0.363844
ENSMUSG00000043415.5	Otud1	2832	3.37584	1.78335	1.5583	3.21042	-0.924916	0.0343296	-1.12428	0.00770382	-0.0721939	0.890425	-0.199369	0.859615	0.852722	0.0484579	1.05209	0.0182411
ENSMUSG00000026679.3	Enkur	1561	0.108695	0.271939	0.411531	1.07067	1.61964	0.0988844	2.27953	0.0118246	3.71899	8.28949e-06	0.659889	0.659421	2.09935	0.000744409	1.43946	0.0331226
ENSMUSG00000025716.14	Myo3a	7943	0.0109294	0.346851	0.968863	2.61457	6.01545	0.000126396	7.51331	9.12055e-07	8.94931	2.35347e-09	1.49785	0.518378	2.93386	0.00898162	1.43601	0.326705
ENSMUSG00000026786.14	Apbb1ip	7414	0.541297	5.94719	4.08609	5.32707	3.47248	4.70751e-12	2.92978	6.74421e-09	3.31359	2.8503e-11	-0.542699	0.634289	-0.158887	0.823806	0.383813	0.627834
ENSMUSG00000026784.14	Pdss1	4248	0.664999	1.22159	1.64704	1.5993	0.883857	0.000349988	1.32931	1.51392e-08	1.27968	3.7233e-08	0.445457	0.251148	0.395821	0.0895213	-0.049636	0.90239
ENSMUSG00000058835.14	Abi1	4032	17.7108	28.0449	27.5568	40.6943	0.663526	0.000298972	0.638322	0.000489263	1.20051	4.25946e-12	-0.025204	0.964528	0.536988	0.00314662	0.562192	0.00279982
ENSMUSG00000026779.6	Mastl	5777	0.411382	2.73701	3.48039	3.22025	2.75584	1.14226e-13	3.10565	2.87959e-17	2.99171	3.06786e-16	0.349807	0.672915	0.235866	0.609423	-0.113941	0.865823
ENSMUSG00000026986.14	Hnmt	1769	6.23269	1.05901	0.920264	2.17612	-2.58519	7.72509e-08	-2.78645	5.99382e-09	-1.52602	0.00157496	-0.201267	0.889815	1.05917	0.044585	1.26044	0.0218546
ENSMUSG00000044103.4	Il1f9	1648	0.0394304	1.58204	1.35453	15.5826	6.85991	1.05401e-05	6.63575	1.96361e-05	10.1827	9.94387e-12	-0.224162	0.932573	3.32282	0.000101778	3.54699	4.63114e-05
ENSMUSG00000026981.15	Il1rn	5535	0.0893758	8.97868	6.77229	29.731	6.80183	1.17786e-20	6.39468	2.13959e-18	8.53002	2.10474e-32	-0.407153	0.822205	1.72819	0.0151272	2.13534	0.00297617
ENSMUSG00000026976.15	Pax8	6061	4.59242	0.037541	0.0487267	0.0908881	-7.2534	1.03602e-10	-6.78349	8.0028e-10	-5.76441	8.91708e-08	0.469913	0.893458	1.48899	0.28145	1.01907	0.560951
ENSMUSG00000026974.11	Zmynd19	4168	3.62999	5.09674	6.50368	8.11694	0.491244	0.0508565	0.845883	0.000276304	1.1642	1.93302e-07	0.354639	0.4378	0.672958	0.00332482	0.318319	0.283411
ENSMUSG00000036813.11	Entpd8	2715	0.0719317	3.36256	2.88274	2.20611	5.93081	4.20339e-07	5.70744	1.08303e-06	5.31948	4.6909e-06	-0.223361	0.94354	-0.61133	0.652273	-0.387969	0.839665
ENSMUSG00000036805.13	Noxa1	1617	0.344207	4.24332	3.43427	2.0757	3.73248	8.93867e-06	3.42525	4.84543e-05	2.69421	0.00148344	-0.307233	0.892037	-1.03827	0.254447	-0.73104	0.531161
ENSMUSG00000078202.3	Nrarp	2582	3.36053	7.32971	9.55772	28.737	1.12884	0.0832402	1.51327	0.0141963	3.10251	5.61625e-08	0.384434	0.799883	1.97367	0.000708538	1.58924	0.0125111
ENSMUSG00000036752.4	Tubb4b	2088	68.1082	72.1938	98.6129	148.01	0.0840204	0.834644	0.534331	0.0877619	1.12	7.97621e-05	0.45031	0.436683	1.03598	0.000252283	0.585667	0.0827137
ENSMUSG00000036731.7	Cysrt1	1330	0.0929071	0.220371	0.260639	3.47118	1.62274	0.501533	1.91323	0.399971	5.82207	0.00244646	0.290488	0.958715	4.19933	0.0236656	3.90885	0.053154
ENSMUSG00000115018.2	Ndor1	2045	12.7799	5.91267	5.34527	5.53472	-1.11424	0.000390779	-1.26308	4.38768e-05	-1.21258	7.00982e-05	-0.148842	0.861504	-0.0983435	0.821734	0.0504986	0.936947
ENSMUSG00000006471.18	Ndor1	5835	11.4148	5.62575	5.46877	5.09974	-1.0215	1.07607e-05	-1.06387	3.85453e-06	-1.16457	2.62563e-07	-0.0423779	0.953449	-0.143069	0.638488	-0.100691	0.809848
ENSMUSG00000115074.1	Ndor1	3210	15.3088	7.4704	7.07334	6.85129	-1.03608	2.63119e-05	-1.11679	4.72694e-06	-1.16285	1.28919e-06	-0.0807073	0.909425	-0.126765	0.700237	-0.046058	0.926158
ENSMUSG00000078201.5	Tmem203	854	10.8304	5.63823	5.09186	5.37051	-0.947964	0.00128329	-1.09525	0.000152982	-1.02605	0.000313428	-0.147284	0.852656	-0.0780883	0.849776	0.0691955	0.901863
ENSMUSG00000048707.9	Tprn	2932	4.0762	8.75586	10.7893	12.9257	1.1063	0.0253216	1.40835	0.00299879	1.66865	0.0002801	0.302043	0.799133	0.562346	0.295605	0.260303	0.735623
ENSMUSG00000026958.13	Dpp7	3337	2.34857	4.9201	4.84847	4.49973	1.07155	0.000547131	1.04927	0.000673248	0.942019	0.00207459	-0.0222756	0.981994	-0.129528	0.748361	-0.107252	0.846163
ENSMUSG00000015085.8	Entpd2	2128	14.1974	12.7475	6.35313	1.95693	-0.155485	0.831405	-1.16396	0.0365515	-2.87489	1.64745e-08	-1.00848	0.308225	-2.7194	4.09652e-08	-1.71093	0.00179966
ENSMUSG00000015094.16	Npdc1	3906	26.6976	20.0734	16.8353	10.2958	-0.411453	0.0358457	-0.666127	0.000284939	-1.37526	2.95743e-15	-0.254674	0.506472	-0.963807	1.87301e-08	-0.709133	0.000110926
ENSMUSG00000047617.11	Paxx	2066	8.63799	3.11338	2.59133	2.86241	-1.47723	2.80304e-07	-1.74647	8.45421e-10	-1.60603	1.20846e-08	-0.269234	0.702037	-0.128801	0.748625	0.140433	0.788322
ENSMUSG00000015093.15	Clic3	1012	0.336502	1.02703	0.474369	15.6804	1.73026	0.117841	0.547806	0.668696	5.72099	1.21999e-09	-1.18245	0.558524	3.99073	3.78705e-06	5.17318	2.41249e-09
ENSMUSG00000015090.13	Ptgds	1649	11.218	0.152971	0.145696	0.131986	-6.47485	3.6218e-05	-6.52905	2.87382e-05	-6.71968	1.21925e-05	-0.0541988	0.993577	-0.244832	0.920488	-0.190633	0.955592
ENSMUSG00000015083.11	C8g	1493	1.53896	0.359387	0.300361	0.146662	-2.19554	4.53302e-07	-2.47161	2.14344e-08	-3.66875	1.33706e-13	-0.276067	0.83857	-1.4732	0.0129555	-1.19713	0.0799015
ENSMUSG00000026941.16	Mamdc4	4630	4.0083	2.80445	2.79495	1.99847	-0.517404	0.000524873	-0.522444	0.000417016	-1.00646	1.27868e-12	-0.0050408	0.993577	-0.489055	0.000928126	-0.484015	0.00159118
ENSMUSG00000029419.8	Ajm1	5020	1.73499	0.101766	0.165319	0.0405372	-4.22347	3.21777e-33	-3.44915	7.34945e-27	-5.75531	1.77637e-38	0.774318	0.347634	-1.53184	0.00682887	-2.30616	8.01477e-06
ENSMUSG00000026938.10	Fcna	1374	0.705685	9.44434	11.8584	4.35349	3.80387	0.00113741	4.13233	0.000331278	2.68003	0.0227548	0.328462	0.919452	-1.12384	0.40766	-1.4523	0.336339
ENSMUSG00000062061.3	Obp2a	744	0.116683	0.794789	2.36923	0.548234	3.71275	0.0235632	5.36529	0.000509415	3.12825	0.0518567	1.65254	0.447569	-0.584495	0.688936	-2.23703	0.076922
ENSMUSG00000049086.8	Bmyc	983	10.0835	27.7843	29.098	15.4373	1.46677	0.00549103	1.53397	0.00319433	0.617422	0.267531	0.0671979	0.965306	-0.849346	0.129257	-0.916544	0.13466
ENSMUSG00000026932.14	Nacc2	7815	13.6216	6.66612	5.10561	3.58871	-1.03157	2.76536e-05	-1.41865	3.20942e-09	-1.9258	2.52635e-16	-0.387078	0.436491	-0.894225	0.000237793	-0.507148	0.0807076
ENSMUSG00000048038.8	Ccdc187	9827	1.42198	0.0464989	0.0117597	0.597637	-5.0742	1.0015e-05	-7.70148	6.39416e-10	-1.25668	0.313764	-2.62728	0.291662	3.81751	0.000958106	6.44479	2.87722e-07
ENSMUSG00000026928.14	Card9	2293	0.613542	2.67078	1.7672	2.24353	2.15588	0.00183753	1.54912	0.0303127	1.90271	0.00525499	-0.606756	0.691044	-0.253172	0.776326	0.353585	0.748026
ENSMUSG00000036281.13	Snapc4	6622	5.5389	3.15581	3.29091	2.72481	-0.813483	5.41649e-06	-0.756273	2.36293e-05	-1.02493	3.591e-09	0.0572101	0.911748	-0.211449	0.320983	-0.268659	0.249719
ENSMUSG00000026921.20	Egfl7	3581	5.09274	10.6388	8.7751	19.0265	1.06439	0.0214697	0.786103	0.097395	1.90405	7.4272e-06	-0.278285	0.803854	0.839661	0.072867	1.11795	0.0186936
ENSMUSG00000092356.2	Gm20532	780	7.91826	17.6984	16.0213	32.7794	1.16612	0.00737622	1.02215	0.0194727	2.05803	3.32203e-07	-0.143968	0.90285	0.891911	0.0393433	1.03588	0.0215839
ENSMUSG00000026922.13	Agpat2	2130	4.16366	8.86674	8.40904	14.6826	1.09437	0.000347622	1.01882	0.000875377	1.82246	2.92414e-10	-0.0755459	0.932573	0.728095	0.0171222	0.803641	0.0116028
ENSMUSG00000015787.15	Abo	1920	4.48827	0.32042	0.315293	0.022474	-3.90448	1.50607e-07	-3.94889	9.77327e-08	-10.3429	4.50744e-16	-0.0444136	0.987441	-6.43841	2.42784e-06	-6.394	4.56766e-06
ENSMUSG00000015488.14	Cacfd1	4693	17.6601	9.20681	9.54453	7.8291	-0.940743	3.22484e-10	-0.888737	2.66014e-09	-1.17428	1.11461e-15	0.0520061	0.906097	-0.233535	0.180684	-0.285541	0.126111
ENSMUSG00000036067.12	Slc2a6	3211	0.604411	1.27326	1.07787	2.01699	1.09365	0.0424633	0.848731	0.122239	1.76488	0.00034014	-0.244917	0.852082	0.671236	0.216676	0.916153	0.108815
ENSMUSG00000036040.14	Adamtsl2	7993	0.127098	0.366995	0.378276	2.50235	1.57461	0.027375	1.6205	0.0209061	4.36195	5.85167e-12	0.0458936	0.982692	2.78734	3.57029e-06	2.74144	8.19186e-06
ENSMUSG00000000889.8	Dbh	2692	3.9424	0.042028	0.103201	0.0661754	-7.22496	1.49068e-07	-5.45717	2.52567e-05	-6.31485	1.01371e-06	1.76779	0.580171	0.910112	0.638929	-0.857675	0.706838
ENSMUSG00000009614.16	Sardh	5432	5.80244	4.9346	3.6948	1.74386	-0.234167	0.666832	-0.652929	0.156914	-1.73749	2.17444e-05	-0.418762	0.661554	-1.50332	0.000247782	-1.08456	0.0179446
ENSMUSG00000009621.18	Vav2	6915	15.9149	9.24171	6.22252	4.15954	-0.784484	0.0393927	-1.35676	0.000126774	-1.93736	1.41505e-08	-0.572278	0.418558	-1.15288	0.0010943	-0.580603	0.190023
ENSMUSG00000109946.1	Brd3os	1898	2.23124	1.22465	1.28953	0.371274	-0.876592	0.0680518	-0.806139	0.0902276	-2.65553	2.79954e-09	0.0704536	0.959057	-1.77894	0.000110801	-1.84939	8.24543e-05
ENSMUSG00000015846.15	Rxra	6303	15.2802	12.5957	11.2463	22.971	-0.278824	0.535086	-0.442345	0.280615	0.588208	0.121832	-0.163521	0.868058	0.867032	0.0199855	1.03055	0.00695508
ENSMUSG00000026837.16	Col5a1	8559	11.1426	252.545	235.18	25.9857	4.50306	4.69081e-27	4.40029	6.39763e-26	1.22208	0.0063143	-0.102767	0.937968	-3.28098	1.57004e-16	-3.17821	2.32207e-15
ENSMUSG00000026833.18	Olfm1	3553	9.72173	8.46519	5.86511	4.06527	-0.199904	0.762238	-0.730628	0.179431	-1.25964	0.0113622	-0.530724	0.626086	-1.05974	0.0409231	-0.529015	0.446251
ENSMUSG00000035829.13	Ppp1r26	5619	2.86488	1.32654	2.64596	3.1037	-1.1144	0.00129956	-0.112837	0.801346	0.116846	0.777353	1.00156	0.0434661	1.23124	0.000195926	0.229683	0.667127
ENSMUSG00000026831.16	1700007K13Rik	965	0.277855	0.324691	0.600561	1.9786	0.256072	0.815389	1.27814	0.125958	3.04854	2.47128e-05	1.02207	0.467885	2.79247	8.75029e-06	1.7704	0.00626793
ENSMUSG00000026829.9	Gbgt1	1337	0.64603	3.39926	1.98981	2.02739	2.47009	6.45033e-07	1.68435	0.00107036	1.71899	0.000645681	-0.785742	0.371999	-0.751098	0.130494	0.0346446	0.972026
ENSMUSG00000039787.13	Cercam	3383	3.55906	7.95434	6.53959	1.35126	1.16298	8.1092e-05	0.879668	0.003548	-1.40184	1.68392e-06	-0.283309	0.672667	-2.56482	2.80144e-22	-2.28151	1.97085e-17
ENSMUSG00000054766.13	Set	4070	36.5332	56.9387	74.8073	82.1565	0.640328	0.000805094	1.03446	1.43066e-08	1.16945	7.75399e-11	0.394134	0.239	0.529118	0.00544205	0.134984	0.647614
ENSMUSG00000026785.14	Pkn3	4255	1.26024	2.32528	2.34643	2.73205	0.886563	0.00785266	0.902194	0.00611147	1.12176	0.000381734	0.0156308	0.988487	0.235197	0.546448	0.219566	0.652375
ENSMUSG00000039686.14	Zer1	9784	5.74496	3.46943	2.99477	2.35031	-0.728174	4.88703e-20	-0.944126	9.47585e-33	-1.28934	5.59663e-60	-0.215953	0.10919	-0.56117	6.49175e-13	-0.345217	5.83218e-05
ENSMUSG00000079484.12	Phyhd1	2657	2.20482	4.53423	2.84036	1.37967	1.04574	0.0680624	0.363136	0.574007	-0.682802	0.234174	-0.6826	0.537476	-1.72854	0.000888577	-1.04594	0.090509
ENSMUSG00000026860.16	Sh3glb2	3990	29.7888	8.94799	9.14526	10.846	-1.73632	1.87567e-10	-1.70473	3.47565e-10	-1.45916	7.45475e-08	0.0315897	0.97176	0.277161	0.417086	0.245572	0.559925
ENSMUSG00000089762.3	Ier5l	2683	2.36285	9.75947	11.4213	6.34695	2.05363	5.86832e-10	2.28231	3.36633e-12	1.43289	1.8346e-05	0.228682	0.78682	-0.620737	0.0850654	-0.849418	0.0196134
ENSMUSG00000047363.4	Cstad	1229	1.51665	1.35871	0.982312	0.246414	-0.162044	0.826424	-0.654487	0.287071	-2.78921	1.32159e-06	-0.492443	0.692456	-2.62716	4.153e-06	-2.13472	0.000503297
ENSMUSG00000044320.14	1700001O22Rik	2788	1.92798	0.665663	0.772083	0.548827	-1.55969	0.000669768	-1.32819	0.00388534	-1.84799	3.08176e-05	0.2315	0.852656	-0.288303	0.630776	-0.519803	0.419275
ENSMUSG00000039476.13	Prrx2	1961	3.73732	5.84673	3.38823	0.422751	0.648357	0.235058	-0.144147	0.821955	-3.20422	2.27596e-11	-0.792504	0.395035	-3.85258	9.86599e-18	-3.06008	5.25519e-11
ENSMUSG00000050737.13	Ptges	3931	97.1773	25.0566	20.6759	31.3743	-1.95591	0.00013213	-2.23317	9.12514e-06	-1.63151	0.00132889	-0.277259	0.839274	0.324399	0.621957	0.601657	0.393174
ENSMUSG00000026848.14	Tor1b	5327	24.951	12.4418	11.882	9.90894	-1.00475	5.82269e-22	-1.07133	6.61329e-25	-1.33363	2.53747e-38	-0.0665825	0.819074	-0.328881	0.00326977	-0.262298	0.0350803
ENSMUSG00000026854.16	Usp20	9017	5.07693	2.19797	1.88012	1.75024	-1.20931	1.59552e-12	-1.43797	2.43301e-17	-1.53984	5.71535e-20	-0.228654	0.553498	-0.330527	0.0913605	-0.101873	0.735905
ENSMUSG00000062661.6	Ncs1	4653	2.3396	5.85684	6.92415	4.31888	1.32713	2.25443e-06	1.56954	1.26143e-08	0.887705	0.00181445	0.242407	0.713467	-0.439427	0.157828	-0.681834	0.0272736
ENSMUSG00000055632.18	Hmcn2	16073	4.07824	0.437428	0.179264	0.0885338	-3.22884	5.60121e-07	-4.53459	7.97492e-13	-5.56683	9.85303e-19	-1.30575	0.288583	-2.33799	0.000403732	-1.03225	0.230667
ENSMUSG00000076441.9	Ass1	2414	6.68076	22.5066	16.4248	15.8113	1.75458	3.04024e-05	1.30028	0.00254438	1.24512	0.00334072	-0.454303	0.627166	-0.509462	0.297865	-0.0551593	0.950487
ENSMUSG00000026840.14	Lamc3	6091	6.52598	0.768607	0.379065	0.703691	-3.09835	1.64827e-05	-4.13949	4.32901e-09	-3.22596	4.61936e-06	-1.04114	0.496646	-0.127602	0.906413	0.913534	0.358968
ENSMUSG00000001864.13	Aif1l	4032	0.469799	4.277	3.26386	2.41974	3.21687	8.01382e-06	2.82534	9.76804e-05	2.39279	0.000950555	-0.391526	0.837191	-0.82408	0.322697	-0.432554	0.711384
ENSMUSG00000050592.8	Fam78a	5973	0.122945	1.10192	0.747132	0.642286	3.25547	1.29083e-10	2.68475	1.6084e-07	2.47134	1.23085e-06	-0.570721	0.557073	-0.784132	0.115494	-0.213411	0.788938
ENSMUSG00000051373.5	Plpp7	2078	1.98256	0.939366	0.863004	0.264961	-1.09385	0.00437607	-1.2192	0.00124618	-2.99278	1.74799e-14	-0.125357	0.908264	-1.89893	2.42686e-06	-1.77358	2.19099e-05
ENSMUSG00000039254.16	Pomt1	6442	4.73021	2.64448	2.90705	2.29526	-0.840116	7.26494e-10	-0.703136	2.75484e-07	-1.04442	5.15764e-15	0.13698	0.674417	-0.204308	0.203269	-0.341288	0.0299185
ENSMUSG00000026825.17	Dnm1	5249	3.33383	8.80307	4.83615	0.954413	1.40298	0.0181656	0.537216	0.416843	-1.81247	0.00130915	-0.865766	0.443316	-3.21545	7.17332e-10	-2.34968	2.34217e-05
ENSMUSG00000026822.14	Lcn2	2623	71.0125	169.255	208.638	82.2353	1.25327	0.0263558	1.55508	0.00418419	0.211794	0.742182	0.301818	0.829727	-1.04147	0.0676948	-1.34329	0.0212447
ENSMUSG00000026819.15	Slc25a25	7862	2.24388	3.57581	3.47093	4.48756	0.673006	5.57787e-07	0.631596	2.68409e-06	1.00225	7.70943e-15	-0.0414103	0.910869	0.329246	0.01328	0.370657	0.00709928
ENSMUSG00000039157.12	Fam102a	6066	26.423	13.5465	10.9916	21.7874	-0.964208	0.0594981	-1.26581	0.00933695	-0.278524	0.612525	-0.301607	0.803854	0.685684	0.198065	0.987291	0.0702575
ENSMUSG00000079442.12	St6galnac4	6482	1.0481	3.06441	2.21345	1.65289	1.55388	0.00275699	1.0827	0.0439159	0.661274	0.227488	-0.471177	0.685998	-0.892607	0.102414	-0.42143	0.57707
ENSMUSG00000026811.18	St6galnac6	4815	2.78888	3.5512	2.38943	1.32655	0.349358	0.486194	-0.224906	0.661217	-1.07559	0.00933002	-0.574265	0.496952	-1.42495	0.000365203	-0.850687	0.0716223
ENSMUSG00000026817.14	Ak1	2593	6.73276	15.1746	13.7453	4.99746	1.17482	0.00025295	1.03142	0.00141658	-0.430105	0.214271	-0.143406	0.868888	-1.60493	7.05836e-08	-1.46152	1.86935e-06
ENSMUSG00000026814.16	Eng	4048	7.27984	23.1975	19.0658	33.4873	1.67341	9.99683e-05	1.39032	0.00140314	2.20334	1.04588e-07	-0.283098	0.796475	0.52993	0.285992	0.813028	0.111015
ENSMUSG00000009566.12	Fpgs	3802	13.5844	7.22776	6.68236	3.6	-0.911219	3.98102e-11	-1.02699	6.18758e-14	-1.91885	1.55698e-45	-0.115774	0.741514	-1.00763	3.00717e-14	-0.891853	5.38282e-11
ENSMUSG00000059013.12	Sh2d3c	5233	0.937276	3.04317	2.02954	7.21431	1.70762	0.00111195	1.12209	0.0399416	2.95573	1.94137e-09	-0.585535	0.598258	1.24811	0.0168812	1.83365	0.000330413
ENSMUSG00000053746.8	Ptrh1	1135	1.59711	5.89468	5.88737	5.65507	1.90909	3.23299e-08	1.91166	2.70169e-08	1.85	5.68105e-08	0.00256708	0.999377	-0.0590903	0.900242	-0.0616574	0.922166
ENSMUSG00000026797.16	Stxbp1	4997	4.36802	15.7372	11.8017	10.675	1.85127	0.000769224	1.43578	0.0105365	1.29124	0.0198736	-0.415488	0.755546	-0.560025	0.387724	-0.144537	0.889211
ENSMUSG00000026796.16	Fam129b	4672	33.0627	49.4942	48.3986	83.8601	0.582162	0.0416117	0.549941	0.0523145	1.34295	1.64899e-07	-0.0322208	0.969397	0.760786	0.00465961	0.793007	0.00454484
ENSMUSG00000026791.14	Slc2a8	3209	5.85335	2.74379	2.50471	2.02988	-1.0973	7.01877e-18	-1.22845	5.33846e-22	-1.5389	9.71971e-34	-0.131149	0.686503	-0.441594	0.00165599	-0.310445	0.0549692
ENSMUSG00000004105.8	Angptl2	6286	2.89599	22.6816	20.8126	6.73382	2.97253	1.42931e-09	2.84852	6.18282e-09	1.2198	0.0183312	-0.124008	0.933664	-1.75272	0.000408938	-1.62872	0.00173524
ENSMUSG00000026870.19	Cutal	2441	6.55933	3.08783	1.91329	1.29963	-1.0907	0.0748716	-1.79186	0.00166386	-2.34789	1.95372e-05	-0.701165	0.5619	-1.2572	0.0346083	-0.556031	0.49885
ENSMUSG00000026873.9	Phf19	5039	3.41492	1.16384	1.15512	0.67544	-1.56049	0.000217312	-1.57366	0.000173753	-2.3475	7.14942e-09	-0.013162	0.994204	-0.787008	0.0891487	-0.773846	0.132804
ENSMUSG00000026874.10	Hc	6265	0.0569514	0.368429	0.196054	43.2465	2.86425	0.0013077	1.93042	0.038441	9.76446	2.33343e-33	-0.933829	0.587953	6.90021	6.75977e-24	7.83404	6.32583e-30
ENSMUSG00000026879.14	Gsn	3157	239.438	79.7049	40.8904	142.098	-1.58706	0.000497061	-2.55035	4.96534e-09	-0.752818	0.113773	-0.963282	0.22448	0.834245	0.0880655	1.79753	5.7034e-05
ENSMUSG00000026880.11	Stom	2827	8.7279	33.6684	48.4605	64.4887	1.94981	4.28202e-11	2.4758	1.77453e-17	2.88773	1.10101e-23	0.525993	0.373959	0.93792	0.00198532	0.411927	0.303801
ENSMUSG00000035778.17	Ggta1	4709	3.05905	10.269	7.10749	9.49496	1.74994	1.37056e-10	1.2179	1.24798e-05	1.6367	1.3818e-09	-0.532039	0.307772	-0.113234	0.76409	0.418805	0.237027
ENSMUSG00000026890.19	Lhx6	4805	0.361259	1.29825	0.878701	0.844685	1.8705	0.000100531	1.29848	0.00916499	1.24755	0.0106916	-0.572022	0.558434	-0.622953	0.230758	-0.0509313	0.957567
ENSMUSG00000047250.13	Ptgs1	3884	36.5452	21.0328	12.9002	15.4611	-0.797326	0.349068	-1.50355	0.048931	-1.24157	0.100393	-0.706221	0.669312	-0.444243	0.632264	0.261979	0.843422
ENSMUSG00000026915.16	Strbp	18616	8.47466	4.29448	4.21607	3.93707	-0.980832	0.000149135	-1.0079	8.50791e-05	-1.10634	1.05073e-05	-0.0270653	0.974142	-0.125513	0.715252	-0.0984478	0.834477
ENSMUSG00000035392.17	Dennd1a	15344	3.19937	2.38915	2.20054	1.10933	-0.421718	0.416202	-0.541129	0.268544	-1.5299	0.000322455	-0.11941	0.924109	-1.10818	0.0122445	-0.988771	0.0417541
ENSMUSG00000026749.11	Nek6	10714	0.618194	7.05442	5.74952	3.93358	3.52178	4.68441e-33	3.22653	7.80568e-28	2.67901	1.43603e-19	-0.295255	0.670602	-0.842769	0.00591729	-0.547514	0.132804
ENSMUSG00000035236.17	Scai	12341	3.13689	2.5406	2.16529	1.50735	-0.304793	0.180859	-0.537377	0.00971539	-1.05897	5.07188e-08	-0.232585	0.596094	-0.754177	0.000119428	-0.521593	0.0179878
ENSMUSG00000049744.15	Arhgap15	8818	0.270764	1.08631	0.649136	0.586007	2.02619	0.002866	1.27514	0.0735734	1.13037	0.105877	-0.75105	0.597009	-0.895818	0.225536	-0.144768	0.909463
ENSMUSG00000026872.18	Zeb2	20203	3.36994	9.43728	7.94056	5.28531	1.48626	0.00241804	1.23693	0.0125979	0.649675	0.207586	-0.249331	0.846494	-0.836582	0.109805	-0.587252	0.365892
ENSMUSG00000026764.15	Kif5c	7142	6.18028	0.942854	1.02856	0.489194	-2.72045	1.68711e-06	-2.59596	4.72326e-06	-3.67296	3.09182e-11	0.124491	0.943625	-0.952511	0.140898	-1.077	0.124058
ENSMUSG00000050447.15	Lypd6	3729	2.11925	0.254813	0.107986	0.0647548	-3.11682	0.00171494	-4.45542	5.39536e-06	-5.30924	5.94671e-08	-1.33861	0.533581	-2.19242	0.0469028	-0.853811	0.598432
ENSMUSG00000017144.8	Rnd3	4432	3.31557	18.6581	14.8101	8.05699	2.49587	6.08499e-12	2.16253	2.93696e-09	1.28363	0.000597338	-0.333347	0.70376	-1.21225	0.00106611	-0.878902	0.0356089
ENSMUSG00000053475.5	Tnfaip6	1710	0.4955	2.44604	2.76372	1.11341	2.36442	0.00175222	2.54544	0.000623852	1.21402	0.12315	0.181025	0.930972	-1.15039	0.14133	-1.33142	0.113289
ENSMUSG00000026950.18	Neb	26675	2.31791	0.200201	0.184197	0.0780957	-3.5445	7.88672e-06	-3.6669	3.22723e-06	-4.91906	1.69352e-10	-0.122394	0.960484	-1.37456	0.123487	-1.25216	0.222957
ENSMUSG00000075334.2	Rprm	1460	9.04945	0.903212	1.17664	1.48456	-3.37061	0.000441977	-2.9693	0.00201353	-2.63059	0.00567924	0.401304	0.883823	0.740017	0.538238	0.338713	0.847656
ENSMUSG00000026826.13	Nr4a2	4059	1.60723	4.21846	9.40238	12.0369	1.39834	0.065062	2.55725	0.000237088	2.91359	1.74598e-05	1.15892	0.395035	1.51525	0.0376442	0.356336	0.762152
ENSMUSG00000026827.12	Gpd2	6549	3.47394	14.2416	21.5771	35.6656	2.0377	3.47458e-06	2.63751	8.06172e-10	3.3625	1.50336e-15	0.599808	0.520515	1.3248	0.00290343	0.724989	0.187616
ENSMUSG00000026828.11	Galnt5	4462	0.642343	1.69967	0.965765	0.258593	1.41798	0.0661026	0.594554	0.483852	-1.33956	0.075451	-0.823426	0.590422	-2.75754	6.46781e-05	-1.93412	0.0121649
ENSMUSG00000026832.12	Cytip	6744	0.785675	4.67363	2.85677	5.11008	2.5824	1.97469e-05	1.87027	0.0025882	2.71141	4.65529e-06	-0.71213	0.587953	0.129005	0.883709	0.841136	0.287051
ENSMUSG00000026836.15	Acvr1	4829	3.20894	11.7794	12.6566	8.33596	1.87914	8.59585e-20	1.9839	4.63637e-22	1.37991	3.19355e-11	0.104759	0.854032	-0.499237	0.0235217	-0.603995	0.00726077
ENSMUSG00000026989.5	Dapl1	679	0.373903	5.68049	8.87765	48.8885	4.18564	0.00309206	4.83714	0.000464873	7.30596	3.30343e-08	0.651503	0.851941	3.12032	0.0190058	2.46882	0.104581
ENSMUSG00000035168.16	Tanc1	14570	5.01812	10.2382	9.98704	10.0619	1.02913	1.50897e-10	0.993724	5.69335e-10	1.00403	2.67923e-10	-0.0354041	0.94354	-0.0250999	0.919671	0.0103042	0.977239
ENSMUSG00000060703.12	Cd302	1354	3.05319	10.6476	6.67838	9.01808	1.81212	0.00151471	1.13569	0.0581729	1.5722	0.0053098	-0.67643	0.568993	-0.239916	0.747264	0.436515	0.605211
ENSMUSG00000026980.15	Ly75	6905	1.18537	2.80556	3.38609	5.46698	1.24793	0.0136923	1.52018	0.0018781	2.21197	2.15427e-06	0.272246	0.829244	0.964044	0.0581925	0.691798	0.261153
ENSMUSG00000054580.14	Pla2r1	9618	5.70595	1.37544	0.975436	1.57437	-2.05631	6.63757e-10	-2.55912	7.31334e-15	-1.86136	1.66755e-08	-0.502809	0.486642	0.194952	0.666753	0.697761	0.0853394
ENSMUSG00000026971.15	Itgb6	7111	3.057	11.5854	9.34493	13.0664	1.92433	0.00230683	1.61409	0.0114544	2.09795	0.000592328	-0.310242	0.852128	0.173613	0.841493	0.483855	0.607376
ENSMUSG00000026970.16	Rbms1	5473	11.3619	33.2632	28.9317	39.541	1.5503	6.28596e-13	1.34918	4.52116e-10	1.79981	2.17646e-17	-0.201115	0.701609	0.249516	0.343292	0.450631	0.0835618
ENSMUSG00000064289.15	Tank	6096	2.6909	5.64028	5.46735	5.71669	1.07183	1.55816e-25	1.02623	1.62971e-23	1.08988	7.09007e-27	-0.0455934	0.865482	0.0180534	0.901015	0.0636468	0.68616
ENSMUSG00000026914.15	Psmd14	2820	9.69461	19.9052	25.0577	29.1176	1.03893	2.6597e-07	1.37244	3.51945e-12	1.58789	3.58711e-16	0.333512	0.407405	0.548957	0.00781003	0.215445	0.453141
ENSMUSG00000000392.17	Fap	5662	0.244065	3.72035	3.12513	0.701012	3.97438	1.34811e-13	3.7235	4.09214e-12	1.55556	0.00623727	-0.250873	0.861095	-2.41881	1.5356e-06	-2.16794	3.45206e-05
ENSMUSG00000026896.14	Ifih1	8165	2.81186	8.36947	13.1656	14.8005	1.57559	2.13679e-09	2.2296	4.32371e-18	2.39812	5.64297e-21	0.654017	0.130474	0.822535	0.00211576	0.168518	0.69908
ENSMUSG00000075324.13	Fign	9969	1.38901	0.789555	0.434349	0.281452	-0.818868	0.302385	-1.68872	0.0172009	-2.31977	0.000594947	-0.869849	0.549412	-1.50091	0.0371081	-0.631057	0.53189
ENSMUSG00000026888.14	Grb14	7185	2.75477	1.13301	1.06481	1.37968	-1.28635	0.0235047	-1.37741	0.0132299	-1.00006	0.0735702	-0.0910585	0.956217	0.286297	0.685577	0.377355	0.656528
ENSMUSG00000034903.18	Cobll1	8342	18.8089	5.33285	4.81381	6.04074	-1.81938	0.000714941	-1.96799	0.000206378	-1.63968	0.00195614	-0.148605	0.923691	0.179702	0.807442	0.328307	0.706343
ENSMUSG00000026994.9	Galnt3	4374	7.70873	14.3577	15.6856	25.782	0.898367	0.0101308	1.0264	0.00256034	1.74317	6.08229e-08	0.12803	0.893458	0.844799	0.0135561	0.716768	0.0603728
ENSMUSG00000027030.15	Stk39	4955	18.2697	13.0508	9.88011	7.82601	-0.485585	0.426501	-0.887495	0.105382	-1.22452	0.0172484	-0.40191	0.745771	-0.738937	0.19434	-0.337027	0.676347
ENSMUSG00000034738.8	Nostrin	1888	1.12411	7.79243	5.9352	14.3478	2.8216	4.86019e-18	2.42321	1.65153e-13	3.70336	4.601e-31	-0.398387	0.544998	0.881764	0.00439444	1.28015	2.17214e-05
ENSMUSG00000005233.16	Spc25	3188	1.37619	3.84242	4.9003	4.6737	1.4885	9.85619e-06	1.84352	2.13524e-08	1.77358	5.65034e-08	0.35502	0.623549	0.285079	0.476982	-0.069941	0.912379
ENSMUSG00000027068.6	Dhrs9	4281	0.0297494	1.00495	0.542786	2.74004	5.68893	2.55848e-08	4.78563	3.59236e-06	7.14503	7.0571e-13	-0.903302	0.540225	1.4561	0.0450072	2.3594	0.000788909
ENSMUSG00000027070.14	Lrp2	16701	0.86062	0.116109	0.0989044	5.72671	-2.92115	0.00252222	-3.15396	0.00093654	2.73795	0.0035306	-0.232804	0.934154	5.6591	6.13849e-11	5.8919	1.23466e-11
ENSMUSG00000027086.16	Fastkd1	5853	2.99301	1.51467	1.63442	1.37317	-0.984667	2.9555e-06	-0.880037	3.05072e-05	-1.12547	4.29861e-08	0.10463	0.859022	-0.140803	0.611283	-0.245433	0.411653
ENSMUSG00000042155.3	Klhl23	4925	10.0808	2.87945	3.34449	3.49531	-1.81132	3.20961e-10	-1.59178	3.47252e-08	-1.5314	8.59661e-08	0.219535	0.770401	0.279914	0.442686	0.0603785	0.918297
ENSMUSG00000042064.13	Myo3b	7039	2.23856	0.247132	2.02543	1.69763	-3.2126	0.0147706	-0.144242	0.934975	-0.400105	0.794967	3.06836	0.130123	2.8125	0.0329034	-0.255863	0.91714
ENSMUSG00000027015.4	Cybrd1	5339	0.507986	0.281906	0.200485	1.0971	-0.869176	0.331424	-1.38375	0.0940526	1.12432	0.159628	-0.514571	0.793388	1.99349	0.00934663	2.50806	0.0012163
ENSMUSG00000027010.16	Slc25a12	7342	7.54638	4.11448	3.60656	2.95079	-0.876216	2.13153e-06	-1.06675	4.42738e-09	-1.35755	2.96201e-14	-0.190533	0.657928	-0.481338	0.0132056	-0.290805	0.226621
ENSMUSG00000027018.11	Hat1	2886	5.15037	8.9246	13.5114	15.9609	0.794589	0.0063245	1.39542	3.26446e-07	1.63457	1.03896e-09	0.60083	0.211007	0.839986	0.00234828	0.239156	0.559547
ENSMUSG00000027111.16	Itga6	9142	10.3843	41.6641	42.3646	43.9343	2.00493	1.83296e-16	2.02914	6.49825e-17	2.08153	6.4879e-18	0.0242008	0.977118	0.0765976	0.830216	0.0523968	0.916842
ENSMUSG00000055612.15	Cdca7	3202	2.06479	8.46684	14.5747	13.0586	2.04299	1.08646e-06	2.82814	4.12093e-12	2.66897	5.07705e-11	0.785153	0.320899	0.625984	0.182445	-0.159169	0.834441
ENSMUSG00000027108.15	Ola1	3561	7.90641	12.2326	16.3187	18.3876	0.630694	0.00263356	1.048	1.35047e-07	1.21896	4.11093e-10	0.417303	0.24882	0.588268	0.00376066	0.170965	0.570336
ENSMUSG00000041762.16	Gpr155	6679	4.76335	20.5337	16.4395	3.57993	2.10949	0.00656643	1.78844	0.0224229	-0.412438	0.639887	-0.321048	0.878846	-2.52193	0.000638357	-2.20088	0.00532275
ENSMUSG00000075284.10	Wipf1	5896	3.57408	13.723	9.81573	11.2286	1.94314	0.000120549	1.4592	0.00475721	1.65366	0.00097346	-0.48394	0.676284	-0.289475	0.659735	0.194465	0.831767
ENSMUSG00000043342.9	Hoxd9	2136	21.4339	2.55857	3.11376	3.15169	-3.07763	6.92844e-10	-2.78967	2.22874e-08	-2.77246	1.9834e-08	0.287961	0.835847	0.305174	0.651646	0.0172137	0.988382
ENSMUSG00000027102.4	Hoxd8	2744	27.2087	5.00843	5.98475	5.58779	-2.44558	0.000348633	-2.1871	0.00144437	-2.2864	0.000670621	0.258481	0.894316	0.159178	0.870636	-0.0993033	0.943527
ENSMUSG00000101174.8	Hoxd4	2948	19.4146	1.99936	2.45467	2.3804	-3.28964	4.71019e-07	-2.99032	4.83444e-06	-3.03499	2.52985e-06	0.299322	0.871117	0.254644	0.780956	-0.0446776	0.975655
ENSMUSG00000059005.13	Hnrnpa3	5396	44.35	64.9848	79.5021	92.7539	0.551272	0.00290111	0.842399	1.85897e-06	1.06466	6.7486e-10	0.291126	0.417583	0.513389	0.00482324	0.222262	0.363113
ENSMUSG00000015839.6	Nfe2l2	3796	17.3257	27.7688	23.0966	47.5087	0.680987	0.00129132	0.415326	0.0618402	1.45585	1.49123e-13	-0.265662	0.546749	0.774865	0.000112415	1.04053	1.07648e-07
ENSMUSG00000042410.16	Agps	9421	6.3219	11.12	10.4456	35.065	0.815172	0.286517	0.72493	0.337568	2.47241	0.000123824	-0.0902423	0.964552	1.65724	0.0140268	1.74748	0.0138585
ENSMUSG00000075271.4	Ttc30a1	3721	0.804557	0.919967	1.34907	1.83587	0.196227	0.665389	0.760006	0.0371564	1.20468	0.000363833	0.563779	0.389376	1.00846	0.00226153	0.444677	0.300338
ENSMUSG00000075270.11	Pde11a	5208	0.105803	2.66704	1.67783	0.115553	4.76765	0.000536411	4.0969	0.00317216	0.143725	0.936721	-0.670745	0.852063	-4.62392	0.000462864	-3.95318	0.00526077
ENSMUSG00000042359.18	Osbpl6	10063	5.92774	2.12487	1.57928	1.80272	-1.48191	0.0235299	-1.91179	0.0023203	-1.71944	0.00566253	-0.429884	0.783793	-0.23753	0.77845	0.192353	0.867979
ENSMUSG00000002732.14	Fkbp7	1485	3.23862	14.4466	13.6384	3.52861	2.16899	3.245e-11	2.08639	1.64136e-10	0.128021	0.760359	-0.0826019	0.932573	-2.04097	1.48183e-11	-1.95837	1.6222e-10
ENSMUSG00000044033.16	Ccdc141	11717	1.99693	0.490852	0.474857	1.96515	-2.03318	0.00143544	-2.07884	0.00100673	-0.022931	0.980315	-0.0456596	0.982692	2.01025	0.00122416	2.05591	0.00138107
ENSMUSG00000027016.17	Zfp385b	8223	1.08738	0.284213	0.231843	0.241949	-1.95669	0.00582487	-2.2607	0.00113169	-2.18998	0.00132942	-0.304004	0.874947	-0.233285	0.808524	0.070719	0.961035
ENSMUSG00000027009.18	Itga4	13978	0.947105	3.62166	2.43736	3.028	1.93855	0.000403831	1.36596	0.0156554	1.68006	0.00193437	-0.572592	0.635565	-0.258488	0.719672	0.314104	0.725509
ENSMUSG00000059173.19	Pde1a	6012	4.76068	2.1724	1.89572	0.355863	-1.13461	0.0044689	-1.33179	0.000626924	-3.76452	7.69614e-24	-0.197177	0.851398	-2.62991	5.00178e-13	-2.43273	5.32466e-11
ENSMUSG00000027006.13	Dnajc10	5004	192.669	115.739	104.708	30.6776	-0.73528	0.122334	-0.879845	0.0534184	-2.65114	8.45951e-11	-0.144564	0.905196	-1.91586	2.38207e-06	-1.7713	2.50068e-05
ENSMUSG00000027004.3	Frzb	3237	0.155848	12.9757	7.04959	0.541247	6.5183	1.45949e-21	5.63603	2.34356e-16	1.9046	0.0100823	-0.882268	0.511581	-4.6137	3.08128e-15	-3.73143	7.11759e-10
ENSMUSG00000027087.11	Itgav	10744	12.9531	35.0833	41.7981	55.1882	1.43777	2.85909e-05	1.69055	5.58831e-07	2.09142	2.50743e-10	0.252782	0.770735	0.653652	0.0799746	0.40087	0.401354
ENSMUSG00000048388.3	Fam171b	5744	1.32176	1.89755	1.8172	0.22339	0.523805	0.473256	0.46282	0.519287	-2.60734	1.06357e-05	-0.0609848	0.974342	-3.13114	3.40256e-08	-3.07016	9.69189e-08
ENSMUSG00000059588.13	Calcrl	4882	6.48104	6.98582	4.0453	57.3027	0.108325	0.908602	-0.681386	0.366842	3.14609	5.36046e-07	-0.78971	0.573913	3.03777	7.08408e-07	3.82748	1.97185e-10
ENSMUSG00000027082.15	Tfpi	5463	2.107	5.00247	3.51754	6.29922	1.25045	0.0242178	0.741199	0.205598	1.5829	0.0024479	-0.509247	0.670602	0.332451	0.619061	0.841698	0.194293
ENSMUSG00000034101.14	Ctnnd1	7319	52.0415	66.1079	69.9759	113.015	0.345205	0.226334	0.427281	0.115147	1.11883	3.61702e-06	0.0820766	0.907988	0.773626	0.00184322	0.69155	0.00941591
ENSMUSG00000101645.1	Gm28635	4734	70.8346	90.8794	97.4333	157.467	0.359552	0.210287	0.460068	0.0904581	1.15259	2.23778e-06	0.100515	0.888424	0.793038	0.00152906	0.692523	0.0101822
ENSMUSG00000034075.10	Zdhhc5	5047	25.6626	32.3009	33.31	56.2168	0.332006	0.436455	0.376502	0.355019	1.13152	0.00120504	0.0444953	0.967316	0.79951	0.0297107	0.755015	0.0608811
ENSMUSG00000034059.14	Ypel4	2614	0.800497	1.02058	0.579368	0.24257	0.35234	0.489066	-0.48506	0.316032	-1.78916	4.04025e-05	-0.8374	0.254916	-2.1415	1.84208e-07	-1.3041	0.00589177
ENSMUSG00000023224.12	Serping1	2325	27.9183	144.811	88.9023	46.5802	2.37569	1.81198e-06	1.67161	0.00106433	0.738988	0.172176	-0.704076	0.504626	-1.6367	0.0010943	-0.932626	0.12417
ENSMUSG00000027078.14	Ube2l6	1996	1.83269	10.7182	14.9439	15.632	2.56356	4.66006e-17	3.04504	6.46047e-24	3.10851	4.24551e-25	0.481477	0.418915	0.544952	0.093659	0.0634745	0.913731
ENSMUSG00000027075.16	Slc43a1	5716	1.69327	1.34015	1.29958	0.367351	-0.339396	0.533413	-0.382352	0.460554	-2.22502	2.15963e-07	-0.0429558	0.975873	-1.88563	9.48678e-06	-1.84267	2.55339e-05
ENSMUSG00000050896.12	Rtn4rl2	1506	0.356422	9.39481	4.88268	1.11851	4.83848	2.45674e-15	3.88981	3.0622e-10	1.74074	0.00796471	-0.948668	0.384077	-3.09774	3.4717e-09	-2.14907	0.000153786
ENSMUSG00000027074.14	Slc43a3	4464	3.7406	12.0109	9.57686	17.4126	1.68564	0.000645074	1.35881	0.00676413	2.22196	2.65293e-06	-0.326829	0.792248	0.53632	0.350281	0.863148	0.14272
ENSMUSG00000044338.9	Aplnr	3699	1.44843	16.5214	12.1604	7.45524	3.52279	1.1915e-20	3.08032	5.13697e-16	2.37404	5.32927e-10	-0.442473	0.600607	-1.14876	0.0032559	-0.706284	0.131211
ENSMUSG00000075224.10	Lrrc55	6474	0.116699	3.46981	2.06355	0.121599	4.98351	1.84615e-13	4.23209	5.23898e-10	0.0753964	0.937211	-0.751411	0.599791	-4.90811	8.50859e-16	-4.1567	3.44276e-11
ENSMUSG00000075217.1	Fads2b	2272	0.174186	1.04446	1.40383	13.3736	2.72472	0.0816528	3.16046	0.0362004	6.42899	3.30702e-06	0.435739	0.911296	3.70427	0.00830942	3.26854	0.0332115
ENSMUSG00000045392.8	Olfr1033	4261	14.1353	5.42808	5.72547	0.489964	-1.38261	0.0044107	-1.30603	0.00693548	-4.87846	2.88856e-27	0.0765804	0.95821	-3.49585	8.50859e-16	-3.57243	2.62327e-16
ENSMUSG00000063235.16	Ptpmt1	3684	0.884645	1.51708	1.65522	2.03554	0.787269	0.00521785	0.917954	0.000800503	1.20965	3.7514e-06	0.130685	0.847777	0.422384	0.124755	0.291699	0.39541
ENSMUSG00000002105.15	Slc39a13	4869	5.59379	8.11449	7.70449	3.15359	0.537203	0.0794428	0.462169	0.131406	-0.827942	0.00329874	-0.0750339	0.926475	-1.36515	2.02385e-07	-1.29011	1.68845e-06
ENSMUSG00000002111.8	Spi1	2695	1.16912	12.1961	7.23114	11.5773	3.40277	5.22799e-08	2.64661	3.07278e-05	3.32766	7.03086e-08	-0.756164	0.580171	-0.0751099	0.938363	0.681054	0.443454
ENSMUSG00000002108.10	Nr1h3	2515	1.44713	1.97623	1.58598	3.70669	0.454691	0.459519	0.130877	0.848358	1.36798	0.00661066	-0.323814	0.799655	0.913291	0.0866096	1.2371	0.0225652
ENSMUSG00000027253.15	Lrp4	10504	2.90377	2.91425	2.3086	8.62031	0.00545706	0.998192	-0.331201	0.576453	1.57122	0.00105364	-0.336658	0.783115	1.56576	0.00105984	1.90242	7.00092e-05
ENSMUSG00000027244.14	Atg13	4368	28.2063	9.55972	8.97441	10.4423	-1.56189	1.26958e-13	-1.65372	2.99099e-15	-1.4354	6.84921e-12	-0.0918218	0.884429	0.126492	0.661011	0.218313	0.492882
ENSMUSG00000027243.8	Harbi1	5588	3.20091	1.61425	1.46237	1.4463	-0.990435	0.000139644	-1.14057	8.48148e-06	-1.15276	4.72411e-06	-0.150135	0.828659	-0.162324	0.630323	-0.0121891	0.984131
ENSMUSG00000027239.14	Mdk	1324	2.6989	33.2389	43.3668	42.5728	3.63885	0.000113465	4.02305	1.50357e-05	3.99631	1.32514e-05	0.384193	0.885281	0.357456	0.779622	-0.0267378	0.990149
ENSMUSG00000027230.9	Creb3l1	2603	3.36632	30.4687	32.4305	9.49202	3.1843	1.12799e-12	3.27458	1.97307e-13	1.50072	0.00122915	0.0902798	0.948597	-1.68358	0.000181495	-1.77386	0.000112558
ENSMUSG00000040434.16	Large2	5837	7.89892	2.56368	2.3873	2.01423	-1.62609	4.61598e-05	-1.73128	1.19575e-05	-1.97571	3.35703e-07	-0.105187	0.930023	-0.349617	0.481619	-0.24443	0.712247
ENSMUSG00000044916.10	1700029I15Rik	1348	1.59707	0.909657	0.820876	0.594909	-0.834729	0.0655236	-1.0175	0.0203253	-1.47209	0.000474856	-0.182768	0.878846	-0.637361	0.191699	-0.454592	0.465454
ENSMUSG00000027223.15	Mapk8ip1	4644	4.70613	2.76553	2.1573	1.67067	-0.768515	0.00337935	-1.12947	7.49122e-06	-1.49586	1.1676e-09	-0.36096	0.500405	-0.727348	0.00536942	-0.366389	0.278417
ENSMUSG00000068742.11	Cry2	6320	6.99003	4.00946	2.76685	3.60205	-0.802846	0.000544666	-1.34234	1.63714e-09	-0.957786	1.88017e-05	-0.539493	0.158839	-0.15494	0.599202	0.384553	0.178369
ENSMUSG00000049922.8	Slc35c1	3275	7.14494	14.0289	14.9086	18.2176	0.97467	0.00229535	1.06271	0.000722311	1.35159	8.38652e-06	0.0880376	0.922055	0.376923	0.295041	0.288886	0.524721
ENSMUSG00000027220.2	Syt13	3761	1.12423	0.992933	1.02576	0.402535	-0.182767	0.816476	-0.128899	0.868619	-1.50721	0.0100825	0.0538682	0.977192	-1.32444	0.0282797	-1.37831	0.032008
ENSMUSG00000075028.12	Prdm11	10177	2.08037	0.77603	0.668081	0.847478	-1.42758	1.76635e-08	-1.64823	5.31096e-11	-1.29857	2.04911e-07	-0.220642	0.728774	0.129012	0.711943	0.349655	0.319684
ENSMUSG00000068735.14	Trp53i11	3690	3.88628	21.6182	19.8222	33.7308	2.47941	1.47243e-08	2.35461	7.36746e-08	3.12164	2.74154e-13	-0.124804	0.923691	0.642229	0.20273	0.767033	0.161211
ENSMUSG00000027215.13	Cd82	3005	45.7359	26.8009	18.4222	27.3185	-0.771206	0.00177861	-1.31252	2.20893e-08	-0.743808	0.00203843	-0.541317	0.19212	0.0273984	0.941927	0.568715	0.0359601
ENSMUSG00000040272.14	Accs	8364	0.827594	1.41509	1.14331	0.682409	0.779961	0.00276639	0.466915	0.0904338	-0.279145	0.325263	-0.313046	0.55015	-1.05911	8.60705e-06	-0.74606	0.00461312
ENSMUSG00000087006.3	Gm13889	1392	6.20537	4.37491	2.26962	9.79813	-0.508707	0.383651	-1.4669	0.00352983	0.662427	0.205669	-0.958198	0.297938	1.17113	0.0200064	2.12933	7.94761e-06
ENSMUSG00000027195.10	Hsd17b12	2407	13.9115	26.4341	33.6991	43.5417	0.927157	0.000465053	1.2784	5.90707e-07	1.6474	4.25966e-11	0.35124	0.520635	0.720239	0.00633753	0.368999	0.275376
ENSMUSG00000027165.16	B230118H07Rik	4289	3.72495	1.36548	1.35953	1.03598	-1.45535	3.35783e-19	-1.45492	2.87524e-19	-1.85099	3.28581e-30	0.000432712	1	-0.395636	0.0385573	-0.396069	0.0554336
ENSMUSG00000027188.8	Pamr1	6046	0.419974	1.94388	1.35005	1.37214	2.22965	0.00949946	1.69904	0.0531381	1.72506	0.0429177	-0.530615	0.799655	-0.504586	0.631131	0.0260283	0.988944
ENSMUSG00000005087.17	Cd44	6776	5.51069	76.7733	82.7725	121.567	3.80209	2.54399e-27	3.91066	6.27525e-29	4.4652	1.01151e-37	0.108568	0.919083	0.66311	0.101346	0.554542	0.243009
ENSMUSG00000012350.15	Ehf	5576	106.762	48.2599	60.8748	52.9711	-1.14561	0.00284637	-0.81053	0.0408037	-1.01129	0.00737954	0.335079	0.70348	0.134323	0.794804	-0.200756	0.749879
ENSMUSG00000032724.5	Abtb2	6032	1.07118	2.01133	2.24266	3.66366	0.913691	0.0264024	1.07245	0.0070514	1.78181	1.89263e-06	0.158756	0.883912	0.868114	0.0284842	0.709357	0.116832
ENSMUSG00000032698.15	Lmo2	2166	24.3914	9.74717	7.7737	6.02353	-1.32471	0.00115042	-1.65292	3.12297e-05	-2.02038	1.78454e-07	-0.328212	0.73623	-0.695667	0.114924	-0.367455	0.536181
ENSMUSG00000032679.12	Cd59a	1811	7.55197	6.04134	3.67488	1.46323	-0.323354	0.533078	-1.04551	0.0159364	-2.38255	4.12661e-09	-0.722156	0.37349	-2.0592	2.23096e-07	-1.33704	0.0024439
ENSMUSG00000027171.10	Prrg4	3165	2.23355	4.05469	7.368	19.6247	0.864082	0.214858	1.72881	0.00561532	3.14307	8.06729e-08	0.864725	0.492001	2.27899	0.000103251	1.41426	0.036532
ENSMUSG00000016458.15	Wt1	6195	0.875262	5.0668	3.01435	0.188235	2.5427	0.000110759	1.79088	0.00822855	-2.25802	0.000702392	-0.751818	0.597882	-4.80072	1.28802e-15	-4.0489	5.42021e-11
ENSMUSG00000005973.6	Rcn1	3196	204.312	67.6516	53.8625	17.7496	-1.59481	0.000215658	-1.92371	5.09926e-06	-3.52628	3.4077e-18	-0.328899	0.75589	-1.93147	2.16439e-06	-1.60257	0.000200017
ENSMUSG00000016386.15	Mpped2	3425	4.50482	3.68987	2.05146	1.28437	-0.288564	0.759374	-1.14134	0.137564	-1.82268	0.0103128	-0.852779	0.573278	-1.53412	0.0381081	-0.681339	0.504485
ENSMUSG00000027122.15	Arl14ep	5313	4.7307	6.53089	7.34924	9.73562	0.465758	0.307573	0.636746	0.135921	1.04188	0.00802431	0.170988	0.873858	0.576119	0.18666	0.405131	0.46338
ENSMUSG00000027115.14	Kif18a	9832	0.234781	0.854008	1.18222	1.13405	1.88017	3.87524e-08	2.35631	1.95916e-12	2.29271	5.6504e-12	0.476139	0.469424	0.412541	0.26476	-0.0635974	0.91949
ENSMUSG00000027160.16	Ccdc34	6558	1.17503	3.45947	5.39077	3.58958	1.56447	2.19178e-07	2.20589	6.14048e-14	1.61832	4.88295e-08	0.641411	0.221234	0.0538481	0.903711	-0.587563	0.0948947
ENSMUSG00000074971.4	Fibin	2267	2.23878	6.30641	4.95153	5.58517	1.50177	0.00937869	1.15277	0.0508465	1.32675	0.0189789	-0.348996	0.804383	-0.175014	0.818595	0.173982	0.865785
ENSMUSG00000050808.13	Muc15	3569	0.100468	0.0269281	0.0524413	1.56949	-2.58604	0.191029	-1.13033	0.57503	4.14253	0.0101154	1.45571	0.735551	6.72857	5.08074e-05	5.27286	0.00137752
ENSMUSG00000027134.4	Lpcat4	2823	5.2335	40.0973	47.0104	49.9611	2.94144	6.36055e-09	3.17107	2.69236e-10	3.25882	5.79495e-11	0.229631	0.873053	0.317386	0.636261	0.0877549	0.933323
ENSMUSG00000057378.15	Ryr3	18977	2.39474	0.126917	0.0833921	0.0287062	-4.26355	4.57786e-05	-4.88988	2.18729e-06	-6.49736	1.85311e-10	-0.626325	0.822152	-2.23381	0.0507811	-1.60748	0.24499
ENSMUSG00000044042.19	Fmn1	16077	2.32827	5.87639	4.23766	2.13172	1.33682	4.26725e-06	0.864013	0.00413932	-0.127199	0.720462	-0.472808	0.41838	-1.46402	1.04479e-07	-0.991213	0.000957004
ENSMUSG00000074934.3	Grem1	4148	0.0314548	4.0026	1.2956	6.60459	7.59884	1.39014e-06	5.9649	0.000191675	8.32306	6.59745e-08	-1.63394	0.592767	0.724225	0.694866	2.35816	0.171098
ENSMUSG00000041219.14	Arhgap11a	5332	1.99175	8.14513	9.40952	9.50333	2.03593	1.05647e-12	2.24545	2.25981e-15	2.25908	1.04554e-15	0.209521	0.774154	0.223147	0.541333	0.013626	0.984131
ENSMUSG00000068614.7	Actc1	1618	0.246257	0.204772	0.171485	2.33686	-0.305877	0.844431	-0.614065	0.665469	3.40119	0.00151622	-0.308188	0.924112	3.70707	0.000359117	4.01526	0.000179025
ENSMUSG00000027351.14	Spred1	6784	10.2645	21.2392	17.9673	13.549	1.04951	6.36065e-06	0.808091	0.000644109	0.401115	0.105877	-0.241422	0.64924	-0.648397	0.00645818	-0.406976	0.155832
ENSMUSG00000027347.18	Rasgrp1	5600	0.646456	2.00425	1.12168	0.907836	1.6439	0.00389452	0.802073	0.194435	0.49556	0.426646	-0.841826	0.440454	-1.14834	0.0468489	-0.306513	0.736983
ENSMUSG00000040152.8	Thbs1	6073	7.81928	264.234	244.852	160.929	5.08005	1.21951e-17	4.97013	5.71847e-17	4.36464	1.90587e-13	-0.109918	0.954749	-0.715407	0.329279	-0.605489	0.503694
ENSMUSG00000040133.2	Gpr176	3899	0.240791	3.93292	4.14538	0.483632	4.10011	8.30751e-13	4.17556	2.47408e-13	1.05086	0.0991982	0.0754545	0.964552	-3.04924	3.99167e-09	-3.1247	2.10674e-09
ENSMUSG00000040084.9	Bub1b	4275	1.51321	8.48252	11.2311	11.1498	2.49494	4.48867e-15	2.90144	3.09039e-20	2.89035	3.01608e-20	0.406499	0.555123	0.395404	0.289599	-0.0110955	0.987897
ENSMUSG00000074923.10	Pak6	5211	1.46702	1.70837	1.49646	4.70445	0.220899	0.724151	0.0283121	0.969961	1.68697	0.00026818	-0.192587	0.885284	1.46607	0.00159003	1.65866	0.000439876
ENSMUSG00000040061.17	Plcb2	6597	0.487883	1.75576	1.09488	2.21706	1.86136	0.0100011	1.17505	0.120506	2.19905	0.0014065	-0.686312	0.660097	0.33769	0.709368	1.024	0.240824
ENSMUSG00000046804.13	Phgr1	547	0.118796	8.29965	3.2348	7.26815	7.67175	6.99889e-06	6.29084	0.000278825	7.47887	8.52129e-06	-1.38091	0.575256	-0.192874	0.909013	1.18804	0.465212
ENSMUSG00000040035.14	Disp2	9555	1.92929	0.609983	0.515817	2.33761	-1.6701	0.00664286	-1.91177	0.00147439	0.277836	0.693363	-0.241669	0.887492	1.94794	0.000909674	2.18961	0.000240527
ENSMUSG00000027331.15	Knstrn	5158	1.12861	3.86066	4.56031	4.51141	1.78268	1.53231e-07	2.02553	1.49226e-09	2.00848	1.5051e-09	0.242846	0.774107	0.225797	0.600525	-0.0170487	0.982446
ENSMUSG00000027332.11	Ivd	5505	16.5643	5.6208	4.3223	5.70046	-1.56041	8.40546e-10	-1.94068	9.8673e-15	-1.54126	8.26508e-10	-0.380267	0.488335	0.0191513	0.96329	0.399418	0.235399
ENSMUSG00000074916.5	Chst14	2090	3.83584	7.77421	7.00406	5.17853	1.01914	8.69211e-08	0.871312	5.88091e-06	0.432473	0.0322584	-0.147825	0.741148	-0.586663	0.00145709	-0.438838	0.0345571
ENSMUSG00000027326.13	Knl1	8542	0.788655	4.29337	5.58619	5.41155	2.45306	3.61391e-12	2.83418	4.42249e-16	2.78788	9.63997e-16	0.381114	0.63282	0.334816	0.441287	-0.0462978	0.950848
ENSMUSG00000027323.10	Rad51	6649	0.56845	1.9745	2.72494	2.78164	1.80834	1.7066e-08	2.27774	4.24908e-13	2.30528	1.42776e-13	0.469398	0.455515	0.496942	0.149708	0.0275441	0.966594
ENSMUSG00000046814.3	Gchfr	645	4.2153	1.92451	1.41799	1.17347	-1.15978	0.0259061	-1.60176	0.0014904	-1.89672	0.000113155	-0.441976	0.713797	-0.736936	0.202428	-0.29496	0.733773
ENSMUSG00000055926.3	Gm14137	3067	0.118946	2.17168	1.88293	8.7915	4.38225	8.0615e-07	4.17675	2.53215e-06	6.40668	7.61785e-14	-0.205492	0.932573	2.02443	0.0152157	2.22992	0.0102611
ENSMUSG00000027315.13	Spint1	2767	24.0541	28.9028	32.9799	58.8049	0.265211	0.595212	0.455791	0.310071	1.29015	0.000905516	0.19058	0.858353	1.02494	0.0104711	0.834361	0.063325
ENSMUSG00000034226.7	Rhov	1703	2.49515	3.75528	5.70907	15.1216	0.593653	0.546052	1.2027	0.165211	2.61103	0.000769644	0.609052	0.751771	2.01737	0.011425	1.40832	0.132863
ENSMUSG00000027314.6	Dll4	3852	1.83909	6.16135	4.10538	8.53246	1.75034	0.000122511	1.1645	0.0138432	2.22151	4.22896e-07	-0.585838	0.538962	0.471164	0.378354	1.057	0.0353908
ENSMUSG00000027313.3	Chac1	1637	8.41965	2.7888	2.31446	5.33016	-1.60454	0.00330698	-1.8727	0.000459482	-0.662774	0.247738	-0.26816	0.852903	0.941762	0.104827	1.20992	0.0444638
ENSMUSG00000048647.9	Exd1	6042	1.30278	0.355614	0.324238	0.513598	-1.89251	1.47918e-08	-2.04831	7.6959e-10	-1.35412	3.78898e-05	-0.155805	0.877148	0.538391	0.168175	0.694197	0.0933368
ENSMUSG00000072980.3	Oip5	1778	0.472285	1.82322	2.43463	2.26718	2.00232	5.67229e-06	2.43273	1.58531e-08	2.32553	5.23353e-08	0.430417	0.600635	0.323216	0.48749	-0.107201	0.879173
ENSMUSG00000027306.15	Nusap1	4059	1.53485	5.55457	9.13304	8.0642	1.86256	5.84455e-07	2.5824	1.12981e-12	2.40181	3.19612e-11	0.71984	0.297212	0.539248	0.196756	-0.180593	0.777491
ENSMUSG00000027293.13	Ehd4	4007	12.1776	29.1546	23.3509	52.8626	1.26033	6.78915e-05	0.939585	0.00369629	2.1189	2.06917e-12	-0.320741	0.656035	0.858572	0.00755308	1.17931	0.000194966
ENSMUSG00000046971.7	Pla2g4f	3203	1.12797	1.99792	1.00046	6.47992	0.832841	0.457988	-0.176182	0.889608	2.53649	0.00599275	-1.00902	0.617144	1.70365	0.0842496	2.71267	0.00483776
ENSMUSG00000062646.12	Ganc	9096	2.40397	1.49269	1.19148	1.52012	-0.688712	3.65861e-06	-1.02065	2.71012e-12	-0.665533	4.87435e-06	-0.331936	0.216147	0.023179	0.91878	0.355115	0.0377232
ENSMUSG00000027287.14	Snap23	4293	7.95593	16.4786	14.4538	18.0013	1.05131	2.4941e-12	0.861425	1.26858e-08	1.17902	1.40178e-15	-0.189889	0.563019	0.127705	0.499996	0.317594	0.0723121
ENSMUSG00000027285.13	Haus2	3218	3.19733	5.2952	5.81289	6.78681	0.730206	0.000783421	0.869367	4.18891e-05	1.08933	1.16434e-07	0.13916	0.792246	0.359121	0.111252	0.21996	0.449808
ENSMUSG00000054484.14	Tmem62	3348	3.76443	2.27759	2.66325	4.55387	-0.727545	0.00396568	-0.497971	0.0556854	0.274823	0.298236	0.229574	0.687314	1.00237	1.47501e-05	0.772794	0.00180078
ENSMUSG00000053675.8	Tgm5	3155	0.272088	1.62471	2.4056	6.58237	2.63964	0.00642123	3.21029	0.000626924	4.66673	2.08409e-07	0.570651	0.805397	2.02709	0.0319291	1.45644	0.193793
ENSMUSG00000027263.12	Tubgcp4	8395	3.18501	5.22711	6.09527	6.63684	0.716281	2.7251e-08	0.937894	1.02759e-13	1.0609	1.50154e-17	0.221614	0.372163	0.344618	0.0077393	0.123004	0.502813
ENSMUSG00000027254.13	Map1a	12166	6.39679	5.06941	4.47033	0.908018	-0.335832	0.565254	-0.517497	0.331081	-2.82073	2.0715e-10	-0.181665	0.89037	-2.4849	8.73916e-09	-2.30323	1.84992e-07
ENSMUSG00000000308.14	Ckmt1	2496	1.88768	11.8816	13.5884	32.4355	2.66567	3.62068e-06	2.85977	5.19278e-07	4.1156	1.04306e-13	0.194099	0.905196	1.44993	0.014198	1.25583	0.0553346
ENSMUSG00000033486.14	Catsper2	3695	1.30715	0.657459	0.63999	0.507659	-1.00456	0.00183416	-1.06619	0.000821355	-1.38904	7.05758e-06	-0.0616286	0.950091	-0.384487	0.309727	-0.322859	0.491399
ENSMUSG00000027246.12	Ell3	2190	0.529813	1.18672	2.53079	3.376	1.19343	0.0724835	2.30151	0.000131085	2.71553	3.43431e-06	1.10808	0.303959	1.5221	0.00941815	0.414017	0.641607
ENSMUSG00000046110.15	Serinc4	4606	0.321598	0.608766	1.23041	1.629	0.939839	0.146061	1.96911	0.000623415	2.37205	2.03067e-05	1.02927	0.324912	1.43221	0.010802	0.402938	0.634115
ENSMUSG00000027238.17	Frmd5	7546	0.0936546	1.72706	0.545491	0.188779	4.287	1.17207e-05	2.61474	0.0106254	1.05544	0.336773	-1.67225	0.365726	-3.23156	0.000631302	-1.55931	0.192175
ENSMUSG00000027227.7	Sord	2352	144.4	18.8012	11.4145	6.73805	-2.94241	2.39571e-07	-3.66432	5.8476e-11	-4.42532	1.06722e-15	-0.721909	0.563929	-1.48291	0.0134481	-0.761005	0.329785
ENSMUSG00000068452.8	Duox2	6771	0.185574	13.6811	3.44671	3.1387	6.25634	3.82162e-07	4.26546	0.000760978	4.13034	0.000944797	-1.99088	0.419807	-2.126	0.118864	-0.135116	0.958109
ENSMUSG00000027225.7	Duoxa2	1592	0.149253	11.1566	3.16385	2.80864	6.52635	1.68908e-06	4.69942	0.000766517	4.52655	0.0010157	-1.82693	0.4953	-1.9998	0.163669	-0.172868	0.94953
ENSMUSG00000033256.14	Shf	2305	1.72177	8.79564	7.96408	4.60047	2.3669	1.20648e-06	2.2232	5.12404e-06	1.43076	0.00410503	-0.143704	0.918022	-0.936136	0.073068	-0.792432	0.188817
ENSMUSG00000027199.14	Gatm	3001	1.67567	4.31943	4.63563	4.00147	1.3739	0.00427796	1.47535	0.00179706	1.26372	0.00720246	0.101451	0.94142	-0.110177	0.866286	-0.211628	0.791619
ENSMUSG00000033213.16	AA467197	1203	0.087719	8.96131	5.39113	17.9989	7.44709	5.02953e-14	6.70838	1.32281e-11	8.4551	4.20565e-18	-0.738708	0.432054	1.00801	0.0412557	1.74672	0.000209602
ENSMUSG00000005802.12	Slc30a4	5482	1.49394	2.137	1.97342	3.15983	0.517922	0.190403	0.404805	0.310693	1.08349	0.00172426	-0.113117	0.908181	0.565567	0.134249	0.678684	0.090915
ENSMUSG00000027200.17	Sema6d	10559	1.48752	5.14327	4.55623	5.74082	1.79237	0.000185037	1.61795	0.000772908	1.95135	2.85998e-05	-0.174423	0.896389	0.15898	0.809659	0.333403	0.657044
ENSMUSG00000027201.16	Myef2	5936	2.54994	7.76529	9.76567	9.67988	1.60979	1.47117e-11	1.94175	1.49259e-16	1.92858	1.65691e-16	0.331966	0.513896	0.318794	0.250848	-0.0131718	0.981053
ENSMUSG00000027203.15	Dut	2410	3.89606	10.7889	15.3803	13.5574	1.47331	4.46727e-05	1.98704	1.47199e-08	1.80398	2.42899e-07	0.513736	0.487688	0.330672	0.446408	-0.183064	0.762626
ENSMUSG00000027204.13	Fbn1	12128	8.28796	130.526	105.705	27.9041	3.97783	5.50912e-33	3.67351	3.23413e-28	1.75193	3.12677e-07	-0.304317	0.717642	-2.2259	5.52401e-12	-1.92158	7.0016e-09
ENSMUSG00000060131.11	Atp8b4	6660	0.164042	1.60316	1.02038	1.86914	3.3425	4.00974e-07	2.68413	6.0394e-05	3.56486	3.56734e-08	-0.658363	0.64924	0.222366	0.801147	0.880729	0.294439
ENSMUSG00000027360.5	Hdc	6389	0.621335	1.61698	1.97218	10.9171	1.38857	0.0703148	1.67766	0.0226862	4.1496	6.48304e-10	0.289098	0.884429	2.76103	3.7589e-05	2.47194	0.000430597
ENSMUSG00000027361.15	Gabpb1	7752	1.95404	3.49954	4.0464	4.48237	0.841872	3.43846e-07	1.0543	6.96099e-11	1.20056	4.51876e-14	0.212426	0.53455	0.35869	0.0339801	0.146264	0.536454
ENSMUSG00000027366.12	Sppl2a	8665	9.04419	20.3414	19.4697	23.1099	1.16989	1.05332e-05	1.10673	3.06219e-05	1.35384	1.64433e-07	-0.0631621	0.937167	0.183952	0.590601	0.247114	0.529638
ENSMUSG00000001999.15	Blvra	2446	3.2201	6.64763	6.68672	8.73872	1.05052	0.000102549	1.06003	7.99885e-05	1.4442	2.44859e-08	0.00951221	0.993043	0.393678	0.1782	0.384166	0.251695
ENSMUSG00000034906.15	Ncaph	4307	2.41026	5.25979	6.78731	6.47993	1.12837	3.19857e-05	1.49907	1.34215e-08	1.43084	4.77122e-08	0.370703	0.504626	0.302468	0.333494	-0.0682346	0.893462
ENSMUSG00000074825.4	Itpripl1	3738	15.771	7.60414	6.5919	7.10602	-1.05348	0.00766217	-1.26087	0.00102103	-1.15242	0.00240285	-0.207388	0.83857	-0.0989418	0.854677	0.108447	0.880038
ENSMUSG00000027368.6	Dusp2	2003	0.410226	2.47967	2.05503	1.98542	2.66005	4.35636e-08	2.38912	1.01163e-06	2.33898	1.28907e-06	-0.270926	0.809654	-0.321067	0.559989	-0.0501418	0.956484
ENSMUSG00000027371.10	Fahd2a	1463	6.61804	3.09402	2.46904	2.6516	-1.10208	0.00147764	-1.43668	2.16936e-05	-1.33273	6.41195e-05	-0.334603	0.674987	-0.230651	0.601041	0.103952	0.873182
ENSMUSG00000079056.12	Kcnip3	3546	5.02982	1.89955	0.918768	0.245092	-1.41113	0.0151176	-2.47376	6.23668e-06	-4.42672	3.62816e-16	-1.06264	0.312925	-3.01559	2.38824e-08	-1.95296	0.00107447
ENSMUSG00000027375.14	Mal	2778	21.789	14.8289	11.7702	38.2083	-0.555579	0.534414	-0.889353	0.275035	0.810629	0.301229	-0.333774	0.864391	1.36621	0.0765161	1.69998	0.0332115
ENSMUSG00000027377.2	Mall	2006	0.720519	6.01255	8.25498	27.087	3.10127	0.00182784	3.56032	0.000256049	5.27686	1.66589e-08	0.459057	0.860651	2.17559	0.0296442	1.71654	0.137166
ENSMUSG00000027379.13	Bub1	4354	0.4457	4.33742	6.27611	6.63575	3.31628	3.11477e-13	3.85179	1.08853e-17	3.93157	1.45334e-18	0.535507	0.580171	0.615288	0.22492	0.0797816	0.929061
ENSMUSG00000027380.10	Acoxl	3179	0.0263274	0.035419	0.0207794	1.86166	0.790795	0.714525	-0.994452	0.6734	7.16956	9.76281e-07	-1.78525	0.634409	6.37876	1.12636e-08	8.16401	2.03432e-08
ENSMUSG00000027381.16	Bcl2l11	8029	3.16979	8.02798	6.05824	6.19376	1.34205	2.40744e-06	0.936109	0.00138134	0.968057	0.000733506	-0.405944	0.496976	-0.373995	0.25608	0.0319485	0.957522
ENSMUSG00000014361.5	Mertk	4336	14.3238	8.18687	5.40715	6.29871	-0.807677	0.186189	-1.40811	0.0115103	-1.18632	0.0320387	-0.60043	0.611331	-0.378641	0.581608	0.221788	0.817927
ENSMUSG00000027386.9	Fbln7	3228	0.897822	1.91397	1.01169	0.0789687	1.10322	0.00367667	0.166811	0.730792	-3.69972	8.66841e-16	-0.936406	0.09192	-4.80294	7.78913e-29	-3.86653	2.95634e-18
ENSMUSG00000042851.17	Zc3h6	5668	3.6528	2.32032	1.38863	0.920356	-0.655917	0.0415443	-1.40559	2.05147e-06	-1.99811	4.94415e-12	-0.749677	0.12279	-1.34219	3.66504e-06	-0.592516	0.1038
ENSMUSG00000027397.14	Slc20a1	5580	3.39254	10.7041	10.9651	17.2441	1.65988	1.77432e-09	1.69549	6.28625e-10	2.34844	2.06031e-18	0.0356042	0.967258	0.688558	0.0174814	0.652954	0.037858
ENSMUSG00000048327.6	Ckap2l	3137	1.74122	7.71864	10.7188	11.2311	2.15606	2.03078e-07	2.63181	1.06397e-10	2.69833	2.41101e-11	0.475745	0.599791	0.542272	0.254193	0.0665274	0.937016
ENSMUSG00000027399.1	Il1a	1974	0.117894	3.88046	2.95438	14.1965	5.35065	1.6635e-11	4.95678	4.67377e-10	7.22803	1.20085e-20	-0.393863	0.810734	1.87738	0.0032386	2.27125	0.00040066
ENSMUSG00000027398.13	Il1b	1907	0.464064	14.8539	10.6374	49.0733	5.07714	2.93481e-12	4.59495	2.86579e-10	6.80289	1.16862e-21	-0.482192	0.791468	1.72575	0.0198621	2.20794	0.00301662
ENSMUSG00000027400.11	Pdyn	2887	0.135936	0.0184997	5.01689	9.09424	-4.80328	0.148549	5.3727	0.0671483	6.23269	0.0263412	10.176	0.0113274	11.036	0.000137826	0.859989	0.865823
ENSMUSG00000037885.18	Stk35	6195	5.95059	7.14074	12.8989	25.6307	0.263346	0.742341	1.11729	0.0844325	2.10813	0.000375359	0.853943	0.494058	1.84478	0.00208161	0.990838	0.181547
ENSMUSG00000027405.16	Nop56	4099	9.45946	13.7853	22.5103	24.4488	0.54378	0.0040062	1.25281	7.96048e-13	1.37116	2.34419e-15	0.709031	0.00221959	0.827375	1.31882e-06	0.118344	0.682042
ENSMUSG00000027408.7	Cpxm1	2432	4.51919	61.3952	42.5141	4.56399	3.76925	8.19933e-14	3.23886	1.70555e-10	0.0153374	0.98538	-0.530385	0.656562	-3.75391	1.73608e-15	-3.22352	2.79149e-11
ENSMUSG00000037703.14	Lzts3	4252	7.08805	1.8595	1.65439	1.02944	-1.9369	4.2917e-10	-2.10705	7.89893e-12	-2.79129	5.80844e-20	-0.170152	0.845952	-0.854394	0.0111064	-0.684243	0.0723859
ENSMUSG00000068290.11	Ddrgk1	2084	45.6766	16.4106	15.3237	15.2846	-1.47757	6.94574e-50	-1.57856	1.07158e-56	-1.58162	1.59863e-57	-0.100999	0.692691	-0.104055	0.430982	-0.00305644	0.990474
ENSMUSG00000074796.10	Slc4a11	4998	0.178936	1.33131	1.33564	1.8135	2.96819	1.97403e-05	2.97441	1.72718e-05	3.41775	4.29611e-07	0.00622469	0.999107	0.449563	0.593595	0.443338	0.67283
ENSMUSG00000027312.14	Atrn	13208	6.54173	8.10476	7.6567	25.5494	0.309249	0.735812	0.227166	0.804332	1.96604	0.00448111	-0.0820834	0.969876	1.65679	0.0204088	1.73887	0.021432
ENSMUSG00000027316.15	Gfra4	2165	1.95252	0.863774	0.587554	0.219353	-1.20083	0.0206722	-1.77597	0.000372949	-3.25852	1.04495e-10	-0.575142	0.602134	-2.05769	8.69137e-05	-1.48255	0.0120839
ENSMUSG00000027318.17	Adam33	5394	2.41854	1.52961	0.668633	0.256348	-0.663918	0.581904	-1.87198	0.0669175	-3.27855	0.000547067	-1.20807	0.552983	-2.61464	0.00744901	-1.40657	0.256598
ENSMUSG00000027322.11	Siglec1	7143	0.527425	8.94077	8.99808	5.78384	4.09901	2.23239e-08	4.10784	1.80429e-08	3.47017	1.98541e-06	0.00882561	0.99851	-0.628841	0.495236	-0.637666	0.567
ENSMUSG00000074793.10	Hspa12b	3685	1.80653	3.30803	1.96875	6.36525	0.87671	0.186189	0.123771	0.876979	1.82393	0.00170192	-0.75294	0.54241	0.947224	0.139437	1.70016	0.00554988
ENSMUSG00000048911.15	Rnf24	6801	1.61783	3.70528	3.10639	3.20354	1.19821	6.72535e-06	0.944715	0.000486739	0.9896	0.000188269	-0.253491	0.676284	-0.208607	0.526427	0.0448846	0.933014
ENSMUSG00000027333.18	Smox	3894	9.0548	18.7627	21.4229	37.685	1.05193	0.0394019	1.24376	0.0116038	2.0586	8.72454e-06	0.191825	0.887839	1.00667	0.0454202	0.814849	0.161959
ENSMUSG00000027335.9	Adra1d	1899	0.435626	3.56938	2.96133	1.28661	3.09858	0.00057425	2.82646	0.0017313	1.61156	0.085017	-0.27212	0.910636	-1.48702	0.114231	-1.2149	0.278352
ENSMUSG00000098754.7	Prn	3370	1.80032	6.97515	4.33097	4.37118	1.9619	3.49355e-10	1.27273	7.86449e-05	1.28733	4.8779e-05	-0.689169	0.204177	-0.674573	0.0412011	0.0145965	0.984131
ENSMUSG00000027338.16	Prnd	3211	0.217597	5.17903	2.70312	2.84336	4.66074	8.81576e-25	3.71907	5.07863e-16	3.79421	7.88317e-17	-0.94167	0.142368	-0.866531	0.0362012	0.075139	0.924201
ENSMUSG00000027342.14	Pcna	2400	10.4888	32.2591	44.9403	53.4173	1.62249	4.61336e-08	2.10154	5.21782e-13	2.35052	3.32008e-16	0.479052	0.42686	0.728031	0.0199815	0.248979	0.584971
ENSMUSG00000027346.15	Gpcpd1	7289	25.0065	5.05949	3.74157	6.57853	-2.30662	1.918e-23	-2.74304	8.45058e-33	-1.92708	7.2893e-17	-0.436429	0.361801	0.379537	0.166789	0.815965	0.00122386
ENSMUSG00000044991.10	Shld1	2117	2.48544	0.890706	0.893031	0.887226	-1.50156	0.000138883	-1.51663	0.000107293	-1.50248	8.91952e-05	-0.0150703	0.992861	-0.000913073	1	0.0141572	0.987515
ENSMUSG00000027353.14	Mcm8	3718	0.698557	1.255	1.98002	2.01951	0.857101	0.0130073	1.52633	1.74917e-06	1.55217	8.019e-07	0.669228	0.206001	0.695069	0.0288003	0.0258409	0.967514
ENSMUSG00000043110.2	Lrrn4	3715	0.0496894	0.312107	0.357391	1.17432	2.97625	0.0780006	3.16947	0.0538258	4.92787	0.00127847	0.193224	0.964868	1.95163	0.228695	1.7584	0.362363
ENSMUSG00000027356.8	Fermt1	5699	3.62122	13.4841	23.4969	28.1979	1.89909	0.000516422	2.70082	3.06748e-07	2.96387	1.15063e-08	0.80173	0.466939	1.06478	0.0654056	0.26305	0.777792
ENSMUSG00000027358.6	Bmp2	3555	1.91705	4.25542	2.35914	1.30559	1.15559	0.0458456	0.299453	0.659199	-0.556139	0.353275	-0.856135	0.420009	-1.71173	0.00132577	-0.855592	0.204619
ENSMUSG00000051177.16	Plcb1	11115	6.05517	3.5926	2.35628	2.16138	-0.75395	0.21129	-1.36305	0.0128798	-1.48768	0.00513794	-0.609099	0.599148	-0.733734	0.222384	-0.124635	0.902294
ENSMUSG00000039943.16	Plcb4	8970	28.6588	5.22701	4.58305	3.27536	-2.456	1.18161e-08	-2.64653	5.70802e-10	-3.13083	9.96904e-14	-0.190528	0.878846	-0.674823	0.174931	-0.484295	0.438576
ENSMUSG00000027281.16	Slx4ip	5905	1.39627	2.22011	2.88459	3.31542	0.669101	9.59077e-05	1.05142	1.33412e-10	1.2486	6.72577e-15	0.382321	0.139582	0.579501	0.00015808	0.19718	0.34726
ENSMUSG00000027276.7	Jag1	5827	9.59322	17.7508	33.8289	39.6146	0.88829	0.185991	1.81907	0.00248789	2.04679	0.000466123	0.930777	0.428982	1.1585	0.0677546	0.227724	0.832465
ENSMUSG00000039092.9	Sptlc3	2845	3.70502	3.73817	2.09046	10.5867	0.0131185	0.996605	-0.83025	0.455381	1.51827	0.125295	-0.843368	0.701765	1.50515	0.146877	2.34852	0.0224908
ENSMUSG00000074766.10	Ism1	2965	11.165	3.032	1.4793	9.70259	-1.88604	0.00317488	-2.93189	1.65612e-06	-0.202663	0.79089	-1.04585	0.397274	1.68338	0.00790508	2.72923	7.0304e-06
ENSMUSG00000039033.11	Tasp1	3652	4.83289	2.35227	2.69587	2.24088	-1.04478	5.11878e-15	-0.850831	1.61196e-10	-1.11158	2.43722e-17	0.193949	0.517573	-0.0668056	0.725947	-0.260754	0.123188
ENSMUSG00000051379.12	Flrt3	4865	1.21982	3.57541	3.36786	4.86229	1.558	0.00602034	1.47194	0.00918693	2.00302	0.00019962	-0.0860616	0.959057	0.445013	0.508232	0.531074	0.497339
ENSMUSG00000038844.10	Kif16b	9066	18.8823	4.85831	4.64499	5.17787	-1.95917	2.23485e-38	-2.02584	5.56193e-41	-1.86807	2.78393e-35	-0.0666694	0.886647	0.0911001	0.669543	0.157769	0.505076
ENSMUSG00000037279.13	Ovol2	2113	2.90096	0.577916	0.664111	0.797272	-2.36195	3.73058e-09	-2.16908	4.79937e-08	-1.901	1.08292e-06	0.192875	0.87187	0.460956	0.363047	0.268082	0.696595
ENSMUSG00000027429.16	Sec23b	6302	19.8791	9.90297	12.247	15.5243	-1.00582	3.55172e-09	-0.698208	6.00537e-05	-0.357103	0.0487312	0.307609	0.367613	0.648714	0.000146562	0.341105	0.0985428
ENSMUSG00000074754.4	Smim26	471	12.5977	6.20649	7.01092	6.86406	-1.03515	4.44676e-07	-0.848181	3.26825e-05	-0.88733	8.13964e-06	0.186973	0.712343	0.147823	0.584834	-0.0391494	0.924786
ENSMUSG00000063873.10	Slc24a3	4564	7.39801	1.86742	1.54803	2.2819	-1.99168	2.98597e-05	-2.26461	1.51977e-06	-1.69913	0.000329174	-0.272926	0.831281	0.292551	0.639467	0.565478	0.395782
ENSMUSG00000001768.16	Rin2	11271	4.9878	15.131	15.7696	15.6917	1.60188	2.70475e-10	1.66159	4.28491e-11	1.65441	3.79893e-11	0.0597131	0.938956	0.0525304	0.891321	-0.00718273	0.990614
ENSMUSG00000002728.14	Naa20	3705	3.93849	7.16679	10.0911	12.1786	0.865585	3.85955e-05	1.36185	1.62094e-11	1.63128	2.42043e-16	0.496262	0.137159	0.765695	0.000119002	0.269433	0.320823
ENSMUSG00000037110.20	Ralgapa2	18811	8.65434	4.26977	3.21389	5.41897	-1.01957	0.00129733	-1.4306	2.85634e-06	-0.675614	0.0349668	-0.411036	0.533194	0.343953	0.350298	0.754989	0.0289809
ENSMUSG00000037025.11	Foxa2	2370	0.0261028	0.179848	0.262716	3.10832	4.12306	0.0151068	4.73021	0.00396546	8.37538	4.77122e-08	0.60715	0.811415	4.25232	3.09249e-06	3.64517	0.00010737
ENSMUSG00000074743.4	Thbd	3723	5.5308	13.6899	9.20806	54.107	1.30935	0.0955507	0.736433	0.374316	3.29298	1.84386e-06	-0.572917	0.740549	1.98363	0.00598045	2.55655	0.000371885
ENSMUSG00000027435.8	Cd93	6677	3.24041	31.2483	21.6054	44.2413	3.27215	9.5489e-23	2.73958	3.18609e-16	3.77392	2.60962e-30	-0.532567	0.449096	0.501774	0.203802	1.03434	0.00499819
ENSMUSG00000027438.14	Napb	7051	2.98139	0.505229	0.550839	0.34106	-2.57504	5.29502e-20	-2.45835	1.77411e-18	-3.1463	4.64182e-29	0.116688	0.894421	-0.571258	0.0932307	-0.687946	0.0528089
ENSMUSG00000027446.2	Cstdc2	901	0.210305	0.0604197	0.0587511	1.60855	-3.54135	0.0492306	-3.56266	0.0443714	3.27545	0.00875	-0.0213111	0.998986	6.8168	1.2756e-05	6.83811	1.88186e-05
ENSMUSG00000074736.10	Syndig1	2463	2.867	2.09778	0.736734	0.0285186	-0.454497	0.747316	-1.98894	0.0813329	-8.02478	2.1011e-09	-1.53444	0.485814	-7.57028	2.03311e-08	-6.03584	2.27157e-05
ENSMUSG00000060336.6	Zfp937	2797	3.60545	2.10835	2.067	1.75361	-0.779789	5.19209e-06	-0.802346	2.3683e-06	-1.04459	3.37592e-10	-0.0225569	0.96662	-0.264802	0.180976	-0.242245	0.297353
ENSMUSG00000068129.5	Cst7	986	0.217047	1.48832	0.829782	0.382651	3.091	0.000832319	2.20363	0.0221351	1.01392	0.326836	-0.887367	0.586708	-2.07708	0.00862516	-1.18971	0.235844
ENSMUSG00000027452.11	Acss1	4128	29.0208	9.96312	6.20878	4.5334	-1.5433	0.0090895	-2.22772	7.94732e-05	-2.68095	1.08725e-06	-0.684424	0.579265	-1.13765	0.0614317	-0.453228	0.601478
ENSMUSG00000033059.7	Pygb	4809	50.9684	52.0185	37.5638	25.5396	0.0294708	0.958204	-0.44045	0.281602	-0.997015	0.00579931	-0.469921	0.53735	-1.02649	0.00470645	-0.556565	0.220687
ENSMUSG00000027454.10	Gins1	1516	1.28241	3.62219	4.58459	4.696	1.52411	3.87031e-06	1.87207	6.18282e-09	1.90189	2.30027e-09	0.347959	0.594362	0.377782	0.272283	0.029823	0.961401
ENSMUSG00000027456.8	Sdcbp2	1399	0.697531	13.8686	13.8278	30.4496	4.38092	2.87675e-17	4.37713	2.68898e-17	5.51676	2.84743e-27	-0.00378768	0.999522	1.13584	0.0268967	1.13963	0.0389748
ENSMUSG00000027457.15	Snph	7861	1.42472	0.360941	0.328725	0.0463904	-1.99807	0.00126598	-2.14521	0.000456337	-5.1161	2.02805e-16	-0.147132	0.936336	-3.11803	8.94694e-07	-2.97089	5.27631e-06
ENSMUSG00000027460.7	Angpt4	2335	1.40728	11.487	4.7871	0.0560372	3.04685	1.51379e-08	1.77853	0.00154621	-5.19147	3.29488e-13	-1.26832	0.156823	-8.23832	2.10538e-34	-6.97	2.03448e-24
ENSMUSG00000032802.8	Srxn1	2820	9.37016	15.2692	14.656	19.3956	0.705339	0.0296764	0.647074	0.0453832	1.05063	0.00048227	-0.0582657	0.949569	0.345287	0.331643	0.403553	0.314517
ENSMUSG00000068079.5	Tcf15	980	0.595469	1.24511	0.655915	0.179646	1.11516	0.154702	0.116735	0.906569	-1.97967	0.014049	-0.998425	0.461125	-3.09483	2.65001e-05	-2.0964	0.0132356
ENSMUSG00000032715.9	Trib3	2125	1.7126	3.66498	5.64851	5.0929	1.10613	0.032851	1.73582	0.000348878	1.58461	0.000988493	0.629689	0.529646	0.478484	0.40064	-0.151206	0.864914
ENSMUSG00000051817.8	Sox12	4453	5.60075	3.53202	4.12973	1.94953	-0.667669	0.00613756	-0.440821	0.0811021	-1.52642	1.46507e-11	0.226848	0.674987	-0.858753	0.000219865	-1.0856	2.08226e-06
ENSMUSG00000074679.3	Defb28	397	2.73347	0.108691	0.450372	0.108691	-7.1046	0.00226159	-2.91596	0.195407	-7.30216	0.00123947	4.18865	NA	0	1	-4.38621	0.120138
ENSMUSG00000000359.3	Rem1	2156	2.98503	2.38709	1.54261	1.20265	-0.324991	0.5852	-0.972086	0.0532035	-1.32343	0.00543711	-0.647095	0.513896	-0.998441	0.0461874	-0.351346	0.635732
ENSMUSG00000019188.16	H13	8884	26.7295	12.7693	13.4199	11.0654	-1.06596	7.02428e-41	-0.994617	9.63026e-36	-1.27232	2.41639e-58	0.0713477	0.7287	-0.206354	0.0204088	-0.277702	0.00163444
ENSMUSG00000042745.9	Id1	1160	23.1634	31.15	32.296	51.4675	0.428027	0.124939	0.480635	0.0739231	1.15311	1.88998e-06	0.0526085	0.944447	0.725087	0.00369785	0.672479	0.011692
ENSMUSG00000009876.13	Cox4i2	788	1.17722	2.6485	1.13516	8.35059	1.20576	0.302989	-0.0489037	0.97532	2.88651	0.00384739	-1.25467	0.552361	1.68075	0.115594	2.93542	0.0045715
ENSMUSG00000027469.16	Tpx2	4677	1.9723	10.4264	14.9406	13.6489	2.40759	9.42175e-11	2.9277	1.33534e-15	2.79677	1.82398e-14	0.520108	0.513896	0.389173	0.390629	-0.130935	0.851714
ENSMUSG00000074676.2	Foxs1	1311	0.819264	5.22522	4.75831	1.1592	2.72609	7.13959e-15	2.59505	1.36601e-13	0.522883	0.203863	-0.131044	0.874228	-2.20321	2.1817e-14	-2.07216	1.66937e-12
ENSMUSG00000027474.13	Ccm2l	2407	1.26752	1.41738	1.23807	3.73585	0.163355	0.828918	-0.0343041	0.968195	1.57422	0.00358484	-0.197659	0.896574	1.41086	0.00944267	1.60852	0.00402461
ENSMUSG00000003283.15	Hck	2092	0.815812	8.51007	6.79103	11.154	3.41716	2.09363e-09	3.08987	6.59793e-08	3.8084	1.04566e-11	-0.327286	0.826314	0.391242	0.586144	0.718527	0.342183
ENSMUSG00000074671.6	Tspyl3	3072	0.908184	2.16342	1.62938	0.940376	1.26327	0.00188908	0.850733	0.0447687	0.0511145	0.922584	-0.41254	0.627295	-1.21216	0.00165599	-0.799618	0.0760926
ENSMUSG00000027488.12	Snta1	3094	2.62751	2.78013	2.54172	1.33128	0.0819056	0.897729	-0.048574	0.939596	-0.985907	0.0322036	-0.13048	0.918546	-1.06781	0.0210111	-0.937333	0.0686385
ENSMUSG00000027490.17	E2f1	3154	0.550868	5.59215	6.61815	5.74721	3.37938	2.03414e-18	3.6249	3.65243e-21	3.42039	4.51589e-19	0.245514	0.794958	0.0410097	0.943183	-0.204505	0.740076
ENSMUSG00000027593.15	Raly	3292	16.3227	31.3897	36.652	40.3583	0.943956	1.99904e-06	1.16837	1.95771e-09	1.30673	1.0167e-11	0.224415	0.607034	0.362779	0.0952127	0.138364	0.662819
ENSMUSG00000027596.10	a	1169	5.76092	11.4945	11.9825	12.5297	1.00129	7.67689e-05	1.06655	2.03567e-05	1.12662	4.42686e-06	0.0652558	0.926867	0.125327	0.69567	0.0600711	0.897184
ENSMUSG00000027602.9	Map1lc3a	1181	42.3846	25.3232	20.05	21.0572	-0.744051	8.72472e-05	-1.08125	4.18094e-09	-1.01059	3.11652e-08	-0.337202	0.36231	-0.26654	0.21674	0.0706624	0.84067
ENSMUSG00000027603.15	Ggt7	3264	4.78954	1.48331	1.47607	0.199748	-1.70164	0.0254857	-1.70499	0.0233053	-4.67841	3.34237e-11	-0.00335245	1	-2.97677	3.50377e-05	-2.97342	5.69485e-05
ENSMUSG00000038312.10	Edem2	3463	34.0502	12.1786	11.4385	11.0887	-1.484	3.33015e-14	-1.57525	5.7256e-16	-1.61988	5.19731e-17	-0.0912529	0.87247	-0.135883	0.605989	-0.0446303	0.911696
ENSMUSG00000027611.12	Procr	2031	0.73743	4.74139	3.6259	6.63601	2.71988	4.29039e-06	2.33221	9.41257e-05	3.20718	2.52812e-08	-0.387676	0.790494	0.487297	0.490433	0.874973	0.228867
ENSMUSG00000074649.6	BC029722	1615	15.0819	10.6806	7.76793	6.09878	-0.499485	0.00491088	-0.965456	8.90614e-09	-1.31393	1.66376e-15	-0.465972	0.0810341	-0.814447	7.44066e-07	-0.348475	0.0923775
ENSMUSG00000027613.15	Eif6	2702	14.4917	24.6057	25.9037	33.8556	0.764602	0.00253286	0.839456	0.000740164	1.22507	2.69498e-07	0.074854	0.914904	0.460467	0.082556	0.385613	0.211284
ENSMUSG00000013338.16	Fer1l4	6896	0.186798	4.35877	1.254	5.10358	4.59126	1.28918e-05	2.78796	0.0112901	4.81889	2.92545e-06	-1.8033	0.375258	0.227635	0.88076	2.03093	0.0995251
ENSMUSG00000027624.20	Epb41l1	12037	10.2791	8.70935	5.84531	3.71262	-0.239159	0.510268	-0.815272	0.00667355	-1.47015	1.92551e-07	-0.576113	0.286695	-1.23099	1.10628e-05	-0.654879	0.0487354
ENSMUSG00000067818.6	Myl9	1162	371.757	94.1849	79.5978	12.9283	-1.98128	1.44158e-07	-2.22431	2.29353e-09	-4.84929	3.40475e-41	-0.243028	0.807108	-2.86801	1.57097e-16	-2.62498	1.09834e-13
ENSMUSG00000062175.13	Tgif2	3832	1.20841	3.08729	4.14443	2.62431	1.36139	0.00211574	1.78856	2.89876e-05	1.12741	0.0101433	0.42717	0.657714	-0.233986	0.673586	-0.661156	0.214815
ENSMUSG00000027635.15	Dsn1	3354	0.805787	2.46519	3.29113	2.73525	1.62696	7.59777e-08	2.05008	4.23696e-12	1.78108	1.78431e-09	0.423125	0.46115	0.154127	0.678829	-0.268998	0.511181
ENSMUSG00000055485.6	Soga1	7984	3.78221	9.71959	9.40856	10.8678	1.3628	7.62191e-07	1.31622	1.70569e-06	1.52418	1.56224e-08	-0.0465829	0.956882	0.161379	0.656878	0.207962	0.630777
ENSMUSG00000027639.16	Samhd1	9150	7.83926	16.0266	18.5372	24.9921	1.03238	6.16904e-08	1.24232	3.61132e-11	1.67321	1.02585e-19	0.209934	0.626488	0.640832	0.000851808	0.430898	0.0505028
ENSMUSG00000027641.13	Rbl1	5993	2.88656	6.70561	9.16275	10.1327	1.21787	2.04368e-06	1.66987	2.2873e-11	1.81404	2.02768e-13	0.451997	0.36231	0.596167	0.0254731	0.14417	0.734969
ENSMUSG00000067786.16	Nnat	1829	1.41699	1.85096	11.2637	15.6171	0.390776	0.806752	3.0125	0.0121491	3.48447	0.00265258	2.62172	0.181129	3.09369	0.00866184	0.471968	0.819128
ENSMUSG00000037820.15	Tgm2	4608	30.3112	58.9297	44.0998	72.9307	0.959374	0.0458922	0.540928	0.288508	1.26696	0.00475236	-0.418446	0.687314	0.307588	0.590057	0.726034	0.191075
ENSMUSG00000037813.13	D630003M21Rik	5104	1.77505	1.01971	0.565682	0.195334	-0.804682	0.252524	-1.66988	0.00809875	-3.23641	7.25085e-08	-0.865203	0.499246	-2.43173	6.21993e-05	-1.56653	0.0244803
ENSMUSG00000016024.9	Lbp	4831	2.58958	22.5462	12.1565	4.08603	3.12667	3.05308e-07	2.23466	0.000350371	0.660239	0.338208	-0.892009	0.488335	-2.46643	3.87939e-05	-1.57443	0.0210239
ENSMUSG00000074625.10	Arhgap40	2206	0.319972	3.46208	1.99066	4.88835	3.52473	1.12044e-09	2.71723	3.92742e-06	4.02295	1.27868e-12	-0.807504	0.453976	0.498216	0.439297	1.30572	0.0267357
ENSMUSG00000037754.13	Ppp1r16b	8844	0.542972	1.52074	0.941606	5.04609	1.49325	0.00630582	0.79888	0.17238	3.2273	1.34146e-10	-0.694373	0.52772	1.73405	0.000701498	2.42842	1.10888e-06
ENSMUSG00000027654.2	Fam83d	3991	0.503094	2.32733	2.75898	2.42025	2.23669	7.83802e-09	2.48685	8.28806e-11	2.29551	1.771e-09	0.250162	0.789785	0.0588181	0.915629	-0.191344	0.760048
ENSMUSG00000074622.4	Mafb	3363	2.68145	15.7958	12.8106	8.48083	2.5642	2.40146e-16	2.26073	5.98743e-13	1.66575	1.45422e-07	-0.303468	0.68316	-0.89845	0.00573392	-0.594982	0.122136
ENSMUSG00000027412.12	Lpin3	3694	3.10692	5.58578	5.84834	8.07406	0.848584	0.0771302	0.914821	0.0500327	1.38028	0.00157706	0.0662363	0.960484	0.531699	0.292689	0.465463	0.449946
ENSMUSG00000057133.14	Chd6	19093	10.9587	6.80802	6.12749	5.2292	-0.686872	0.0049046	-0.839351	0.000398232	-1.06788	3.19833e-06	-0.152479	0.801721	-0.381011	0.146521	-0.228532	0.50565
ENSMUSG00000017861.11	Mybl2	4632	0.624045	2.04244	3.01583	3.3978	1.72613	0.000151195	2.29367	2.09037e-07	2.46398	1.48432e-08	0.567541	0.540391	0.737852	0.124616	0.170311	0.828854
ENSMUSG00000074607.11	Tox2	3401	0.253845	0.324978	0.0828913	1.39948	0.366913	0.72793	-1.79555	0.0456707	2.52475	0.00116019	-2.16246	0.0981994	2.15784	0.00502254	4.3203	2.44218e-08
ENSMUSG00000017817.11	Jph2	4255	30.7468	9.21603	6.8072	2.24961	-1.73945	1.34671e-05	-2.17799	2.64833e-08	-3.77776	3.68744e-23	-0.438543	0.625631	-2.03832	8.64062e-08	-1.59977	7.44145e-05
ENSMUSG00000078949.2	R3hdml	1094	0.0793531	4.71495	6.34751	1.71557	6.93357	4.48094e-06	7.3658	8.64219e-07	5.45694	0.000313428	0.432228	0.885281	-1.47663	0.216661	-1.90886	0.132892
ENSMUSG00000017950.16	Hnf4a	4828	0.0586769	5.70519	2.44656	1.52842	6.84985	0.000114403	5.62529	0.00176615	4.94382	0.00565642	-1.22456	0.776247	-1.90603	0.346183	-0.681468	0.825494
ENSMUSG00000017679.16	Ttpal	5951	4.44964	9.03501	8.55999	10.7287	1.02319	0.000975259	0.945143	0.00233325	1.2707	1.96536e-05	-0.0780493	0.931261	0.247509	0.512019	0.325558	0.448073
ENSMUSG00000017697.3	Ada	2002	0.326096	3.38395	5.05797	5.76552	3.45823	9.84641e-17	4.04547	7.48845e-23	4.22996	3.65925e-25	0.587238	0.359169	0.771727	0.0247339	0.184489	0.73525
ENSMUSG00000027656.7	Ccn5	1924	0.795261	8.02788	8.52759	6.82279	3.37211	2.32027e-09	3.45853	7.03448e-10	3.13682	2.04462e-08	0.0864147	0.959264	-0.235289	0.753367	-0.321704	0.725261
ENSMUSG00000018326.9	Ywhab	3382	38.3312	60.9962	65.1177	77.525	0.670422	6.53014e-06	0.76512	1.77848e-07	1.01632	1.17027e-12	0.0946987	0.805397	0.345893	0.0268178	0.251195	0.173288
ENSMUSG00000018209.15	Stk4	5860	8.20021	12.1187	12.4577	18.4796	0.56451	0.00130023	0.604449	0.000479934	1.17333	7.01065e-13	0.0399387	0.937324	0.608823	0.000254074	0.568884	0.00107984
ENSMUSG00000042845.7	Wfdc12	775	0.251993	1.85438	5.67405	0.440724	3.2247	0.0162125	4.86696	0.000118243	1.00786	0.495738	1.64226	0.484849	-2.21684	0.0791769	-3.8591	0.00119397
ENSMUSG00000018211.13	Wfdc15b	572	78.8484	5.83473	6.8968	0.0906149	-3.77434	0.00511989	-3.53017	0.00861855	-12.0151	2.10151e-13	0.244168	0.951451	-8.24073	1.08e-06	-8.4849	7.02016e-07
ENSMUSG00000050383.5	Svs3b	1249	52.7023	307.569	147.795	0.110499	2.54579	0.359368	1.4883	0.606329	-9.44531	5.32998e-05	-1.05749	0.869644	-11.9911	9.27891e-08	-10.9336	2.25931e-06
ENSMUSG00000016998.2	Svs4	731	4594.12	5027.15	2788.21	1.28459	0.130025	0.973891	-0.72039	0.816873	-11.8726	1.27717e-07	-0.850415	0.896818	-12.0026	3.64994e-08	-11.1522	5.79779e-07
ENSMUSG00000017003.7	Svs3a	1200	49.6361	440.436	231.939	0.12928	3.15043	0.24105	2.22514	0.416799	-9.05831	0.000103528	-0.925292	0.889291	-12.2087	4.32682e-08	-11.2834	7.99461e-07
ENSMUSG00000017000.2	Svs6	535	359.683	1174.63	676.387	0.275173	1.70768	0.555371	0.911322	0.762234	-10.8591	1.85761e-06	-0.796356	0.903612	-12.5668	1.00749e-08	-11.7704	1.45984e-07
ENSMUSG00000017004.7	Svs5	646	61161.1	6370.83	3286.45	2.55835	-3.26297	0.20471	-4.21794	0.0829128	-14.5838	1.25383e-11	-0.954966	0.881895	-11.3208	8.87009e-08	-10.3658	1.95332e-06
ENSMUSG00000017002.14	Slpi	1180	2.75631	18.5065	36.6063	28.5518	2.76301	0.000286545	3.74903	3.78859e-07	3.3897	3.91847e-06	0.986021	0.532582	0.626685	0.498766	-0.359336	0.781687
ENSMUSG00000016995.17	Matn4	5174	0.280217	0.781732	0.625316	2.3942	1.50688	0.125983	1.1841	0.234711	3.13329	0.000315447	-0.32278	0.895656	1.6264	0.0820632	1.94918	0.0466686
ENSMUSG00000017007.9	Rbpjl	5732	0.0355867	0.0114665	0.0138568	1.68322	-2.96835	0.0809076	-2.0631	0.16859	5.89001	1.45662e-08	0.905256	0.848225	8.85836	2.10947e-10	7.9531	1.20375e-11
ENSMUSG00000017009.3	Sdc4	2547	32.6408	89.7754	80.4406	93.2905	1.46017	1.15862e-11	1.3018	1.59748e-09	1.51564	9.76529e-13	-0.158375	0.77716	0.0554671	0.861036	0.213842	0.508446
ENSMUSG00000017723.11	Wfdc2	1140	2.32269	138.473	104.967	178.269	5.92299	9.35795e-22	5.52332	4.63786e-19	6.28754	1.15391e-24	-0.399669	0.808391	0.364546	0.662448	0.764215	0.380941
ENSMUSG00000017733.4	Eppin	778	1.49192	0.161256	0.0788901	0.124434	-3.76688	5.69775e-05	-5.80067	9.3832e-06	-4.38072	5.69606e-06	-2.03379	NA	-0.613837	0.693065	1.41996	0.53594
ENSMUSG00000070533.11	Wfdc8	3580	1.48688	0.250991	0.0588414	0.160043	-2.6307	5.99524e-07	-5.07369	2.20079e-16	-3.30407	2.93241e-10	-2.44299	0.00834029	-0.673372	0.319783	1.76962	0.0213461
ENSMUSG00000070529.7	Wfdc10	459	6.96055	0.094009	0.137408	0.281524	-8.70254	1.28935e-13	-7.28325	2.20118e-10	-5.15582	5.47243e-15	1.41929	0.739657	3.54671	0.0149627	2.12743	0.224548
ENSMUSG00000001403.13	Ube2c	2600	2.05412	9.6093	16.0938	16.59	2.23594	4.34259e-07	2.98204	5.17634e-12	3.02529	1.74614e-12	0.7461	0.390082	0.789356	0.100803	0.0432559	0.962515
ENSMUSG00000017300.9	Tnnc2	800	54.0819	1.35936	0.422969	0.0647897	-5.37333	5.00732e-08	-7.22607	4.27726e-13	-11.9551	5.06472e-17	-1.85274	0.371999	-6.58174	1.49982e-05	-4.72901	0.00540731
ENSMUSG00000050373.13	Snx21	4760	3.48526	2.1599	1.92847	1.68873	-0.69472	0.00222056	-0.859045	0.000105359	-1.05047	1.083e-06	-0.164325	0.769706	-0.355755	0.151968	-0.19143	0.568408
ENSMUSG00000017764.2	Zswim1	2781	5.26784	2.449	2.60591	3.01481	-1.11092	1.12693e-11	-1.01758	4.23741e-10	-0.813139	4.36026e-07	0.0933354	0.841305	0.297777	0.111564	0.204442	0.378169
ENSMUSG00000039873.4	Neurl2	1014	2.02869	1.95356	1.18749	0.983103	-0.0558776	0.940337	-0.815215	0.148608	-1.07302	0.0432835	-0.759337	0.460077	-1.01714	0.0611139	-0.257804	0.772766
ENSMUSG00000017760.16	Ctsa	4715	19.1666	38.8379	32.2155	31.2895	1.01938	2.22855e-06	0.749499	0.000669292	0.707544	0.00114753	-0.269879	0.564341	-0.311835	0.205894	-0.0419554	0.922901
ENSMUSG00000017754.13	Pltp	2562	14.5717	33.4111	17.7204	27.4905	1.19813	0.0488132	0.282136	0.694672	0.91663	0.124675	-0.915999	0.415654	-0.281505	0.706184	0.634494	0.419105
ENSMUSG00000017737.2	Mmp9	3539	5.00254	130.934	27.4199	29.9769	4.71341	4.69981e-06	2.45741	0.0246572	2.58606	0.0148138	-2.25601	0.216147	-2.12735	0.0554676	0.128655	0.953226
ENSMUSG00000017652.16	Cd40	3406	0.338232	1.61154	1.65341	1.56171	2.3044	3.78366e-05	2.34134	2.52252e-05	2.25925	3.90171e-05	0.0369358	0.982926	-0.0451523	0.955679	-0.0820881	0.939061
ENSMUSG00000027661.4	Slc2a10	3570	2.33285	2.78735	2.56167	0.817578	0.257436	0.642779	0.1358	0.813187	-1.52353	0.000407766	-0.121636	0.922028	-1.78097	1.91968e-05	-1.65933	0.000130114
ENSMUSG00000017897.18	Eya2	2963	9.48318	17.2552	28.8613	29.793	0.864661	0.210948	1.60749	0.0101446	1.65305	0.00675311	0.742833	0.56812	0.788393	0.256406	0.04556	0.972183
ENSMUSG00000006800.14	Sulf2	5871	4.30818	28.4225	41.1637	22.547	2.72406	1.75003e-05	3.25857	1.67684e-07	2.38993	0.000143315	0.534515	0.726677	-0.334124	0.69192	-0.868639	0.302476
ENSMUSG00000039621.13	Prex1	10266	1.20846	7.3698	5.20786	5.50503	2.61273	2.12845e-11	2.11113	8.39805e-08	2.1917	1.78695e-08	-0.5016	0.558524	-0.421031	0.378418	0.0805686	0.918539
ENSMUSG00000050556.9	Kcnb1	11488	1.6909	0.835671	0.357367	0.478276	-1.02036	0.259465	-2.25833	0.00495378	-1.82938	0.0223979	-1.23797	0.428982	-0.809016	0.389107	0.428956	0.745547
ENSMUSG00000017929.13	B4galt5	4308	5.27283	23.7648	25.1498	19.0226	2.17428	1.09626e-06	2.25596	3.48935e-07	1.85323	2.9136e-05	0.0816856	0.953232	-0.321043	0.57707	-0.402729	0.547138
ENSMUSG00000039463.14	Slc9a8	9095	6.0415	3.82404	3.59888	2.84379	-0.660254	0.00254799	-0.750176	0.000468645	-1.08847	1.27532e-07	-0.089922	0.883193	-0.428215	0.0613552	-0.338293	0.208844
ENSMUSG00000042821.7	Snai1	1621	1.99001	15.8173	12.665	4.95215	3.00861	2.08042e-09	2.68755	9.64961e-08	1.32887	0.0116639	-0.32106	0.80415	-1.67973	0.000774268	-1.35867	0.0128572
ENSMUSG00000090213.1	Tmem189	3265	7.93626	18.8309	15.8214	19.4328	1.24735	9.32008e-24	0.997271	1.88593e-15	1.29309	8.37495e-26	-0.250079	0.282023	0.0457383	0.791331	0.295817	0.0359524
ENSMUSG00000056501.3	Cebpb	1504	5.50489	37.287	36.8352	58.307	2.76644	4.45488e-12	2.74911	5.01391e-12	3.41209	3.27182e-18	-0.0173322	0.991228	0.645647	0.155575	0.662979	0.192175
ENSMUSG00000027540.13	Ptpn1	5533	9.01578	23.3953	20.181	21.7544	1.37664	1.59205e-07	1.16296	1.13663e-05	1.27159	1.00592e-06	-0.213683	0.743949	-0.105049	0.773123	0.108634	0.820803
ENSMUSG00000044641.7	Pard6b	3399	7.67623	4.63702	7.27137	17.6717	-0.728113	0.0379028	-0.0772681	0.862284	1.20439	0.000167718	0.650845	0.277094	1.9325	9.91647e-11	1.28166	6.74456e-05
ENSMUSG00000074575.4	Kcng1	4508	13.8006	0.456171	0.12268	0.0502189	-4.94898	1.22765e-06	-6.94464	6.84979e-12	-8.39761	3.95354e-16	-1.99566	0.324912	-3.44863	0.00178352	-1.45297	0.336031
ENSMUSG00000027544.16	Nfatc2	10578	0.859277	2.31772	1.79139	1.33969	1.43611	0.000574186	1.06209	0.0130964	0.644347	0.142032	-0.374017	0.693518	-0.791762	0.0711011	-0.417745	0.475416
ENSMUSG00000047907.11	Tshz2	7781	24.3111	14.3247	9.04979	3.3499	-0.763341	0.0746085	-1.42652	0.000276717	-2.86225	1.52793e-14	-0.663183	0.389866	-2.09891	9.21476e-09	-1.43573	0.000286816
ENSMUSG00000027495.4	Fam210b	3617	15.654	31.7261	23.1692	13.0622	1.01978	0.071198	0.56595	0.34404	-0.261345	0.67158	-0.453835	0.711451	-1.28113	0.0166292	-0.827295	0.202362
ENSMUSG00000027496.15	Aurka	2531	1.19032	7.2052	9.43896	9.50646	2.61652	1.69192e-13	3.00904	1.02009e-17	3.01801	5.45e-18	0.39252	0.605019	0.401482	0.324684	0.00896187	0.99153
ENSMUSG00000074570.14	Cass4	5340	0.136019	0.921556	0.57857	1.54765	2.83907	0.000659647	2.15749	0.0115556	3.59209	6.93268e-06	-0.681577	0.713467	0.753027	0.424404	1.4346	0.126307
ENSMUSG00000008999.7	Bmp7	4019	10.1196	2.94323	1.75524	1.08146	-1.78579	0.0136444	-2.53727	0.000239538	-3.23912	1.34938e-06	-0.751477	0.625316	-1.45332	0.0485454	-0.701847	0.48238
ENSMUSG00000027510.17	Rbm38	2869	7.3234	2.59135	2.42239	3.88312	-1.50245	1.20497e-07	-1.60164	1.32685e-08	-0.916253	0.00139745	-0.0991922	0.90538	0.586195	0.05991	0.685388	0.0362047
ENSMUSG00000027513.11	Pck1	3429	3.21065	0.054402	0.0600369	0.09408	-6.25536	9.65111e-06	-6.07759	1.45073e-05	-5.30598	0.000103891	0.177764	0.970015	0.949379	0.615181	0.771614	0.755431
ENSMUSG00000027514.14	Zbp1	3529	0.468799	10.6262	24.3637	23.4464	4.54397	2.27974e-16	5.74217	8.31933e-26	5.6866	1.6306e-25	1.19821	0.214594	1.14263	0.0518179	-0.0555791	0.961416
ENSMUSG00000038400.15	Pmepa1	4913	4.94861	75.8945	82.1723	58.4221	3.94203	3.0821e-46	4.05676	4.73116e-49	3.56452	4.54582e-38	0.114724	0.890813	-0.377511	0.262931	-0.492236	0.172959
ENSMUSG00000016256.10	Ctsz	1441	19.6656	90.4069	74.1287	65.9348	2.20255	1.21384e-05	1.91597	0.000157362	1.74704	0.000514857	-0.286578	0.830786	-0.455511	0.463737	-0.168933	0.857881
ENSMUSG00000016255.5	Tubb1	1406	0.0590482	0.125737	0.117039	1.74063	1.71452	0.318637	1.5719	0.355555	5.88477	1.55462e-05	-0.142619	0.965306	4.17025	3.78705e-06	4.31287	3.30598e-06
ENSMUSG00000016257.15	Prelid3b	1860	11.0068	17.8646	19.3431	23.1794	0.699571	0.00011222	0.816704	4.28768e-06	1.07562	4.42425e-10	0.117132	0.795798	0.376051	0.0433366	0.258919	0.251838
ENSMUSG00000027524.9	Edn3	4113	3.90793	0.0292019	0.0246091	0.781348	-7.7383	2.2678e-09	-8.08147	8.84067e-10	-2.33753	0.0610162	-0.34317	0.940275	5.40077	3.74475e-05	5.74394	2.87343e-05
ENSMUSG00000078861.8	Zfp931	2299	2.86411	1.83597	2.00195	1.42368	-0.652414	0.000429556	-0.533371	0.00412611	-1.01924	1.07519e-08	0.119043	0.799787	-0.366829	0.0677546	-0.485872	0.0158699
ENSMUSG00000049999.4	Ppp1r3d	3267	0.416304	2.31695	1.28599	2.43095	2.51554	8.082e-06	1.66051	0.0045758	2.58669	2.81268e-06	-0.855031	0.428132	0.0711437	0.930831	0.926175	0.162645
ENSMUSG00000070476.10	Fam217b	4559	0.597338	2.97954	2.20465	2.172	2.33824	8.01066e-07	1.90109	7.5141e-05	1.88118	7.0231e-05	-0.437147	0.687064	-0.457064	0.415798	-0.019917	0.985047
ENSMUSG00000000305.12	Cdh4	7257	1.53196	0.135259	0.0712919	0.397717	-3.5636	2.52467e-07	-4.55573	6.32544e-11	-1.95986	0.00483853	-0.992126	0.532086	1.60374	0.0321107	2.59587	0.000486493
ENSMUSG00000039086.9	Ss18l1	4343	4.7064	2.20355	2.09855	2.09731	-1.0992	9.0928e-10	-1.17593	4.25869e-11	-1.1712	2.96341e-11	-0.0767261	0.887276	-0.0720003	0.77875	0.00472579	0.991878
ENSMUSG00000039050.8	Osbpl2	4187	27.8258	14.8496	13.6291	18.8219	-0.906305	0.0040688	-1.03039	0.000839076	-0.564522	0.0776192	-0.124085	0.887492	0.341783	0.34428	0.465868	0.231848
ENSMUSG00000038963.15	Slco4a1	4799	4.80583	1.10421	0.528898	1.23207	-2.13316	2.42082e-08	-3.21787	2.31707e-17	-1.97207	1.74029e-07	-1.08471	0.0826659	0.161083	0.76568	1.2458	0.003176
ENSMUSG00000049401.10	Ogfr	2580	13.3933	21.773	27.2372	27.411	0.701856	0.00220795	1.02612	2.99721e-06	1.03434	1.83464e-06	0.324263	0.479707	0.33248	0.1819	0.0082164	0.987036
ENSMUSG00000038932.13	Tcfl5	3166	0.01954	0.250455	1.35476	0.359794	5.08703	0.0183498	7.58967	0.000191321	5.63411	0.00615209	2.50264	0.42686	0.54708	0.803207	-1.95556	0.359761
ENSMUSG00000027574.15	Nkain4	1239	0.677743	0.671736	0.475486	2.26986	-0.0135533	0.996508	-0.577645	0.624515	1.79772	0.0630041	-0.564092	0.819074	1.81127	0.0647701	2.37536	0.0188361
ENSMUSG00000016356.18	Col20a1	5142	3.18823	0.752754	0.648122	0.351599	-2.09457	0.000110691	-2.3227	1.42849e-05	-3.20972	8.80945e-10	-0.228128	0.884333	-1.11515	0.0593099	-0.887018	0.201789
ENSMUSG00000027580.17	Helz2	11529	3.52675	10.9263	16.9873	21.6773	1.63258	1.2457e-17	2.26988	1.56063e-33	2.62132	8.55492e-45	0.637294	0.0200295	0.988735	9.90078e-08	0.351442	0.142985
ENSMUSG00000027581.12	Stmn3	1136	1.62294	0.0652553	0.0598141	0.0379843	-5.86785	3.72483e-08	-5.94275	3.02188e-08	-8.09131	2.77637e-11	-0.074898	0.989027	-2.22346	0.246523	-2.14856	0.34226
ENSMUSG00000027583.13	Zbtb46	8508	0.760801	1.45682	1.17251	1.84136	0.942148	0.10337	0.62667	0.294945	1.28127	0.0160937	-0.315478	0.81542	0.339119	0.609813	0.654597	0.34925
ENSMUSG00000000823.16	Zfp512b	6810	15.2959	9.72252	8.02535	5.26463	-0.654216	0.00229535	-0.93149	6.39574e-06	-1.54116	1.03677e-14	-0.277274	0.532186	-0.886944	1.04468e-05	-0.609669	0.0062902
ENSMUSG00000046470.5	Sox18	1620	2.28694	11.6495	9.17824	11.4797	2.36307	1.11801e-09	2.01835	2.39723e-07	2.34267	9.59116e-10	-0.344717	0.703575	-0.0203989	0.97427	0.324318	0.575596
ENSMUSG00000059540.15	Tcea2	2704	2.65745	1.665	1.45002	0.772491	-0.67921	0.0137913	-0.895453	0.000777277	-1.80406	3.69439e-12	-0.216243	0.737431	-1.12485	2.10838e-05	-0.908602	0.00142051
ENSMUSG00000002458.13	Rgs19	2230	2.08589	8.95914	9.6722	9.35561	2.11573	3.46471e-25	2.22741	5.85927e-28	2.17849	4.77378e-27	0.111674	0.826704	0.0627559	0.814858	-0.0489182	0.894498
ENSMUSG00000027589.14	Pcmtd2	4183	13.7689	7.06729	6.6354	6.55626	-0.96193	7.83834e-12	-1.05562	3.98241e-14	-1.07198	9.17969e-15	-0.0936941	0.804402	-0.110053	0.553396	-0.0163588	0.957567
ENSMUSG00000025255.18	Zfhx4	15737	1.21263	3.11162	2.67036	0.1662	1.36147	0.0890336	1.14079	0.155426	-2.88781	5.8554e-05	-0.220683	0.915649	-4.24928	3.19496e-10	-4.0286	4.33015e-09
ENSMUSG00000103034.1	Gm8797	490	0.622212	1.33316	1.70134	1.46348	1.19844	0.0668477	1.58341	0.00952706	1.33348	0.0284834	0.384973	0.724621	0.135043	0.833871	-0.24993	0.736588
ENSMUSG00000027500.10	Stmn2	5602	1.42698	1.60673	3.67827	1.99434	0.171666	0.850667	1.37111	0.046429	0.485428	0.514101	1.19945	0.331886	0.313762	0.715977	-0.885683	0.297935
ENSMUSG00000040289.8	Hey1	3265	1.1808	2.55268	9.76364	7.53307	1.12035	0.243879	3.06247	0.000235116	2.68728	0.00117999	1.94211	0.155118	1.56693	0.0796967	-0.375186	0.795964
ENSMUSG00000027506.15	Tpd52	7487	21.5249	29.3289	38.8331	49.9658	0.44644	0.375238	0.851546	0.0587855	1.21519	0.00410252	0.405106	0.676955	0.768745	0.0933982	0.363639	0.563662
ENSMUSG00000069114.8	Zbtb10	7414	9.48829	4.81486	4.4688	3.6442	-0.979406	0.013623	-1.08749	0.00501485	-1.38121	0.000210179	-0.10808	0.922028	-0.401805	0.37399	-0.293725	0.613919
ENSMUSG00000027508.15	Pag1	9580	4.43305	2.77972	2.04376	6.53418	-0.673972	0.0795861	-1.11982	0.00167608	0.56036	0.131209	-0.445851	0.552983	1.23433	0.00032603	1.68018	5.506e-07
ENSMUSG00000027533.10	Fabp5	3567	2.03008	30.2363	22.0057	55.3147	3.90495	0.000542434	3.4464	0.00239531	4.7766	1.10839e-05	-0.458544	0.885281	0.871656	0.532766	1.3302	0.382639
ENSMUSG00000049230.8	Gm9833	1830	0.577657	1.57578	2.5368	2.52419	1.492	0.000110458	2.19686	2.33398e-09	2.18329	2.02139e-09	0.704856	0.211011	0.691292	0.0429154	-0.0135645	0.985047
ENSMUSG00000027555.8	Car13	2299	1.91629	11.8245	17.1259	35.8476	2.6384	4.97175e-05	3.17399	6.44189e-07	4.2401	8.9069e-12	0.535594	0.728774	1.6017	0.0159638	1.06611	0.180668
ENSMUSG00000027559.5	Car3	2865	30.7627	0.828993	5.88564	0.0150611	-5.23928	0.00525361	-2.38887	0.24303	-13.7036	1.67402e-11	2.85041	0.431015	-8.46432	6.40727e-05	-11.3147	4.15617e-08
ENSMUSG00000078783.1	Gm9733	618	0.105148	0.968683	0.578566	1.51516	4.65415	0.00276067	3.83159	0.0158845	5.34431	0.000333091	-0.822558	0.669312	0.690165	0.482116	1.51272	0.125474
ENSMUSG00000095788.6	Sirpb1a	2291	0.138228	1.23791	0.636431	1.23889	3.36873	1.91333e-05	2.37615	0.00360846	3.37184	1.28366e-05	-0.992582	0.479377	0.00311441	1	0.995697	0.253469
ENSMUSG00000095028.6	Sirpb1b	2877	0.0372948	1.17078	0.727857	2.5711	5.74482	9.32056e-08	5.04207	3.31434e-06	6.89098	5.21335e-11	-0.702748	0.604852	1.14616	0.0843025	1.84891	0.00440007
ENSMUSG00000074677.11	Sirpb1c	3682	0.022548	1.13893	0.670962	1.6704	6.66853	5.47132e-08	5.89263	1.81566e-06	7.22617	1.97357e-09	-0.775895	0.511358	0.557643	0.403219	1.33354	0.0324306
ENSMUSG00000078780.7	Gm5150	1213	0.0530158	1.38417	0.908084	2.78127	6.21157	2.01169e-05	5.57064	0.000145774	7.23939	3.07534e-07	-0.640932	0.692937	1.02782	0.178745	1.66875	0.0290744
ENSMUSG00000069094.12	Pde7a	7748	2.86081	6.85136	9.82808	12.0475	1.26141	0.00133681	1.7828	2.48383e-06	2.07622	2.14914e-08	0.521398	0.519278	0.814813	0.0449118	0.293415	0.619914
ENSMUSG00000003617.16	Cp	9566	9.26913	41.3928	87.0988	45.6542	2.15943	0.0016881	3.23279	9.28877e-07	2.30082	0.000563333	1.07336	0.424396	0.141392	0.88629	-0.93197	0.292619
ENSMUSG00000019528.18	Gyg	2344	6.89709	9.9038	9.58652	16.449	0.523877	0.02762	0.477402	0.0443679	1.25668	3.80653e-09	-0.0464756	0.944545	0.732801	0.000682177	0.779277	0.000417226
ENSMUSG00000001865.2	Cpa3	1517	0.266768	1.44026	0.453508	0.0787137	2.55894	0.00532312	0.810979	0.448645	-2.21493	0.0376541	-1.74797	0.239	-4.77388	3.32528e-07	-3.02591	0.00437815
ENSMUSG00000027630.13	Tbl1xr1	8903	7.55454	16.5255	17.0664	21.268	1.12986	1.53967e-05	1.17646	5.70691e-06	1.49378	3.35406e-09	0.0466015	0.954536	0.363924	0.223038	0.317323	0.375915
ENSMUSG00000102758.3	Naaladl2	10411	3.09681	2.29487	1.23208	1.22784	-0.432884	0.500811	-1.33476	0.0133575	-1.33847	0.0110563	-0.901873	0.373389	-0.905587	0.111847	-0.00371412	0.999622
ENSMUSG00000027699.19	Ect2	5386	1.01266	5.43455	7.98317	8.89294	2.43465	1.57098e-09	2.9911	4.72532e-14	3.14654	1.26903e-15	0.556447	0.513896	0.711887	0.108147	0.155439	0.833093
ENSMUSG00000027698.14	Nceh1	5253	4.04366	7.06132	5.00209	10.704	0.80576	0.0802847	0.307471	0.548455	1.40645	0.00073968	-0.498289	0.585739	0.600686	0.203888	1.09897	0.015797
ENSMUSG00000039304.11	Tnfsf10	5266	1.47292	11.953	14.1658	17.8792	3.02789	3.1931e-05	3.27311	5.49321e-06	3.60912	3.30935e-07	0.245219	0.905257	0.581231	0.523239	0.336012	0.792061
ENSMUSG00000043164.3	Tmem212	716	0.0602656	0.849086	1.92288	4.91401	5.64022	0.000336771	6.89095	6.4651e-06	8.26196	2.86701e-08	1.25073	0.492145	2.62175	0.00254682	1.37101	0.194842
ENSMUSG00000027695.16	Pld1	12961	1.49829	3.36305	2.96438	3.641	1.16813	6.31266e-05	0.986207	0.000832392	1.28244	6.44645e-06	-0.181924	0.807465	0.114305	0.77194	0.296229	0.475203
ENSMUSG00000050192.8	Eif5a2	5027	0.711588	2.00546	2.07867	1.55245	1.50596	0.0014793	1.55832	0.000882777	1.13582	0.0165432	0.0523594	0.970373	-0.370139	0.511771	-0.422498	0.524806
ENSMUSG00000027684.16	Mecom	12427	7.06411	2.38861	3.28695	6.54954	-1.56576	8.81388e-05	-1.10367	0.00718121	-0.109231	0.825095	0.462081	0.597458	1.45652	0.000186406	0.994443	0.0237325
ENSMUSG00000074653.10	Lrrc31	5530	0.834488	3.40296	2.89084	0.33787	2.03825	0.0386112	1.80131	0.0676785	-1.32163	0.182943	-0.236933	0.930972	-3.35988	0.000186406	-3.12294	0.000893413
ENSMUSG00000027660.16	Skil	9694	4.28794	21.8702	22.8618	29.2826	2.35191	3.61466e-30	2.41616	7.47563e-32	2.77308	5.14774e-42	0.0642483	0.918185	0.421177	0.070743	0.356929	0.183875
ENSMUSG00000027669.14	Gnb4	12692	0.63368	2.24638	1.98878	1.65284	1.8317	2.82997e-07	1.65632	3.7278e-06	1.38901	0.000103822	-0.17538	0.856309	-0.442687	0.285149	-0.267306	0.630552
ENSMUSG00000027671.14	Actl6a	3886	5.49106	8.93099	12.3533	13.2349	0.703066	0.00365657	1.17297	2.92355e-07	1.27122	1.63434e-08	0.469904	0.262708	0.568153	0.0174086	0.0982488	0.811172
ENSMUSG00000056900.13	Usp13	7599	0.464285	1.52374	1.25153	0.30221	1.7263	0.0258514	1.44201	0.0651332	-0.628033	0.448414	-0.284284	0.889977	-2.35433	0.00111606	-2.07004	0.00761186
ENSMUSG00000074637.7	Sox2	2057	0.932345	1.71884	3.12189	6.27161	0.897191	0.221752	1.76962	0.00705076	2.77822	7.23025e-06	0.872431	0.502977	1.88103	0.00255618	1.0086	0.189953
ENSMUSG00000037400.17	Atp11b	9176	8.82895	12.2007	13.0701	24.12	0.466824	0.253723	0.566371	0.145805	1.45029	2.70229e-05	0.099547	0.923106	0.98347	0.00611828	0.883923	0.0230174
ENSMUSG00000027712.13	Anxa5	1777	43.7016	131.012	106.064	98.1417	1.58449	1.30214e-13	1.27966	2.99537e-09	1.16778	5.54279e-08	-0.304829	0.513896	-0.416713	0.0830714	-0.111884	0.769179
ENSMUSG00000027713.6	1810062G17Rik	911	2.50621	1.05255	0.846263	0.437075	-1.28979	0.000226038	-1.65067	2.73327e-06	-2.67629	1.38806e-12	-0.360877	0.682376	-1.38649	0.000938376	-1.02562	0.0341126
ENSMUSG00000027715.9	Ccna2	4083	1.86087	11.5074	15.8819	14.3454	2.63546	1.66417e-11	3.10131	1.03635e-15	2.95411	1.73857e-14	0.465852	0.592767	0.318652	0.52232	-0.1472	0.840756
ENSMUSG00000037225.13	Fgf2	6782	2.81706	12.0425	8.97642	4.69498	2.09839	0.00555853	1.67377	0.0297038	0.738363	0.363037	-0.424616	0.826289	-1.36003	0.0855966	-0.935411	0.340654
ENSMUSG00000050174.15	Nudt6	1677	3.41792	1.82934	1.575	1.54031	-0.908895	0.000173293	-1.14653	1.63905e-06	-1.16335	6.60568e-07	-0.237639	0.681128	-0.254452	0.389722	-0.0168122	0.975614
ENSMUSG00000058174.7	Gm5148	3901	1.14789	0.431571	0.263225	0.161322	-1.43334	0.0341589	-2.19712	0.000672451	-2.91738	3.94372e-06	-0.763782	0.590828	-1.48404	0.0327182	-0.720259	0.448721
ENSMUSG00000044864.16	Ankrd50	8490	7.03558	13.8535	14.5507	21.9566	0.977967	3.54823e-05	1.04925	7.40317e-06	1.64259	3.43711e-13	0.0712781	0.916552	0.664626	0.00555179	0.593348	0.0224375
ENSMUSG00000046743.6	Fat4	17165	4.22667	5.47843	4.78969	1.9308	0.374362	0.598991	0.180624	0.808007	-1.13124	0.0505373	-0.193738	0.90285	-1.5056	0.00812319	-1.31187	0.0358538
ENSMUSG00000025757.13	Hspa4l	11501	0.894133	2.18567	2.81669	4.40481	1.29425	4.79294e-10	1.66175	3.48946e-16	2.30628	6.89199e-31	0.367495	0.355872	1.01203	1.27265e-07	0.644532	0.00223777
ENSMUSG00000025758.10	Plk4	6855	0.597038	1.61456	2.07304	1.78022	1.44169	0.000264442	1.80664	2.65941e-06	1.58467	3.57897e-05	0.364945	0.676284	0.142972	0.78295	-0.221973	0.722976
ENSMUSG00000025762.16	Larp1b	7701	7.68559	3.24292	3.81044	5.03904	-1.24634	9.0229e-06	-1.01341	0.00036194	-0.610377	0.0362821	0.232928	0.735551	0.635965	0.0329047	0.403037	0.275232
ENSMUSG00000025764.14	Jade1	8492	9.45343	10.153	14.6055	33.9737	0.102987	0.882599	0.62803	0.262958	1.846	0.000144111	0.525044	0.634424	1.74302	0.000318731	1.21797	0.0256171
ENSMUSG00000025766.14	D3Ertd751e	5813	2.53657	1.26805	1.29382	1.33611	-1.00547	2.02941e-08	-0.970252	5.60072e-08	-0.932686	1.14226e-07	0.0352211	0.95113	0.0727866	0.773655	0.0375655	0.918086
ENSMUSG00000049100.15	Pcdh10	15888	0.099821	0.113991	1.3766	0.0083511	0.195224	0.925052	3.82359	0.00808879	-4.10506	0.00624694	3.62836	0.0951765	-4.30028	0.00456609	-7.92865	1.64433e-08
ENSMUSG00000037892.13	Pcdh18	5366	1.42816	5.80008	4.48563	5.89587	2.02798	2.24992e-08	1.65769	6.24719e-06	2.05179	9.54718e-09	-0.370297	0.656764	0.0238054	0.96748	0.394102	0.444941
ENSMUSG00000027737.10	Slc7a11	13922	0.135054	1.12689	1.75701	3.79031	3.09302	6.37887e-06	3.73557	2.73779e-08	4.84584	1.71742e-13	0.642557	0.680582	1.75282	0.0110529	1.11026	0.182631
ENSMUSG00000023087.15	Noct	10658	0.62838	2.24252	2.40183	3.03137	1.84173	2.74879e-08	1.94114	3.55879e-09	2.27772	1.84377e-12	0.0994134	0.916733	0.435992	0.250236	0.336579	0.47689
ENSMUSG00000037161.14	Mgarp	2067	0.0899575	4.93883	2.91548	1.22118	6.15059	2.37915e-09	5.3877	1.97866e-07	4.11664	8.1e-05	-0.762896	0.713467	-2.03395	0.0268178	-1.27106	0.265193
ENSMUSG00000074604.9	Mgst2	3703	0.157225	1.59754	0.570583	1.95397	3.45009	6.19542e-07	1.94531	0.00789357	3.74145	3.34288e-08	-1.50478	0.158441	0.29136	0.732402	1.79614	0.00904012
ENSMUSG00000048332.13	Lhfp	5108	1.51293	17.3071	15.2845	19.3193	3.52352	2.4269e-13	3.3442	3.45099e-12	3.68243	9.79726e-15	-0.179317	0.898592	0.158912	0.818066	0.338229	0.667827
ENSMUSG00000037016.11	Frem2	13255	3.58993	0.792011	0.395685	0.216332	-2.18512	0.000272286	-3.19361	3.9059e-08	-4.07171	1.06644e-12	-1.00849	0.394651	-1.88659	0.00174436	-0.878096	0.263317
ENSMUSG00000027750.16	Postn	8702	7.25542	84.1031	79.1039	18.3151	3.53596	1.43614e-22	3.44757	1.48033e-21	1.33663	0.000411787	-0.0883947	0.938019	-2.19933	4.13648e-10	-2.11094	3.2919e-09
ENSMUSG00000027752.15	Exosc8	4333	2.04386	3.64294	4.78278	4.4585	0.835329	0.000208101	1.23308	1.17978e-08	1.12866	1.55709e-07	0.397751	0.333647	0.29333	0.230501	-0.104421	0.77747
ENSMUSG00000027796.2	Smad9	5368	3.44769	0.561751	0.311092	0.429295	-2.63533	0.00676655	-3.5088	0.000190019	-3.02855	0.00117243	-0.873469	0.692691	-0.393223	0.758943	0.480247	0.767521
ENSMUSG00000027797.15	Dclk1	15296	0.576736	6.34347	5.7868	0.483042	3.46612	1.69524e-11	3.33373	8.92043e-11	-0.255689	0.689982	-0.132397	0.933391	-3.72181	8.81631e-15	-3.58942	1.472e-13
ENSMUSG00000027799.12	Nbea	31361	4.91481	3.75144	2.79151	2.17131	-0.389737	0.288742	-0.816806	0.012352	-1.17919	0.000140568	-0.427069	0.520515	-0.789452	0.0150974	-0.362383	0.406948
ENSMUSG00000027800.14	Tm4sf1	4163	1.64755	12.1687	9.07037	13.6362	2.89291	1.70958e-13	2.46847	4.02754e-10	3.05749	3.18515e-15	-0.424436	0.636618	0.164575	0.762938	0.589011	0.253693
ENSMUSG00000027801.7	Tm4sf4	1496	0.0809639	2.01561	0.311455	0.0734458	5.20993	6.47061e-06	2.38319	0.0614272	-0.319058	0.845784	-2.82674	0.0221933	-5.52899	2.47909e-08	-2.70225	0.0250319
ENSMUSG00000027805.16	Pfn2	3541	5.71719	4.56944	4.06974	1.52194	-0.324495	0.331841	-0.490719	0.112166	-1.91517	2.83234e-12	-0.166223	0.823182	-1.59067	2.4676e-09	-1.42445	2.10769e-07
ENSMUSG00000027808.8	Serp1	4611	156.478	43.051	45.9261	41.2675	-1.86215	5.28541e-34	-1.76871	9.20645e-31	-1.92318	1.75619e-36	0.0934462	0.829244	-0.061027	0.785322	-0.154473	0.518705
ENSMUSG00000050075.8	Gpr171	2225	0.0919801	2.21954	1.73676	1.77984	4.90984	7.69691e-11	4.55043	1.72147e-09	4.58874	8.82042e-10	-0.359415	0.798368	-0.321105	0.651545	0.0383102	0.97469
ENSMUSG00000051431.7	Gpr87	1565	0.117251	1.10413	0.541701	4.82653	3.57612	0.0247198	2.51386	0.126938	5.73371	9.38784e-05	-1.06227	0.75589	2.15759	0.158971	3.21986	0.0377232
ENSMUSG00000036362.2	P2ry13	2528	0.220966	2.22844	1.42138	3.65867	3.44368	1.27056e-08	2.78587	5.73336e-06	4.16321	1.76427e-12	-0.657809	0.575256	0.719528	0.242384	1.37734	0.0200028
ENSMUSG00000036353.13	P2ry12	2546	0.358693	2.53411	1.6242	0.965319	2.87771	5.57012e-06	2.22499	0.000583275	1.4696	0.0263924	-0.652725	0.624457	-1.40811	0.0251234	-0.755385	0.356506
ENSMUSG00000036334.12	Igsf10	10150	1.4689	10.717	9.26645	1.71433	2.87074	6.27157e-08	2.661	5.47417e-07	0.223894	0.734233	-0.209737	0.89233	-2.64684	2.01563e-07	-2.4371	3.37545e-06
ENSMUSG00000027765.6	P2ry1	4291	1.33494	1.25035	1.68923	3.34756	-0.0961111	0.921325	0.344182	0.682547	1.33283	0.0520125	0.440294	0.794958	1.42894	0.0400788	0.988649	0.239617
ENSMUSG00000036894.3	Rap2b	6793	2.88531	7.59408	7.09481	9.31849	1.39829	1.86342e-09	1.30031	2.30716e-08	1.69335	9.82998e-14	-0.0979867	0.884429	0.295062	0.278412	0.393048	0.176744
ENSMUSG00000027820.12	Mme	11542	8.86197	2.25299	1.82979	4.01134	-1.97751	0.0412189	-2.2786	0.015172	-1.14421	0.242064	-0.301089	0.906508	0.833302	0.44955	1.13439	0.35244
ENSMUSG00000036834.16	Plch1	8637	1.88168	4.54399	3.96107	4.74654	1.27431	0.0561782	1.07615	0.108361	1.33711	0.0351579	-0.198153	0.909882	0.0627982	0.947914	0.260951	0.811271
ENSMUSG00000027822.16	Slc33a1	3548	28.3356	9.54992	8.35016	9.61698	-1.56997	4.91783e-17	-1.76394	2.53506e-21	-1.5611	4.17212e-17	-0.193975	0.670602	0.00886687	0.978531	0.202841	0.474895
ENSMUSG00000034640.9	Tiparp	4358	5.39326	11.8738	9.33067	15.0789	1.13988	0.0319565	0.792245	0.14887	1.48491	0.00288751	-0.347631	0.782088	0.345036	0.586878	0.692667	0.287265
ENSMUSG00000027832.5	Ptx3	2682	0.128386	2.67305	2.46832	0.431479	4.55138	2.5494e-10	4.4332	6.58046e-10	1.88188	0.0143012	-0.118188	0.950718	-2.6695	1.2223e-05	-2.55131	5.26631e-05
ENSMUSG00000048416.15	Mlf1	1719	0.133816	0.635598	1.42433	1.84093	2.49555	0.00764138	3.70079	2.73228e-05	4.07358	2.34872e-06	1.20523	0.413888	1.57802	0.0424106	0.372789	0.762528
ENSMUSG00000047557.2	Lxn	1508	6.50108	18.6487	19.3761	27.8008	1.52446	4.49923e-05	1.58107	1.99557e-05	2.10117	4.99571e-09	0.0566067	0.960249	0.576708	0.161446	0.520101	0.280559
ENSMUSG00000049404.7	Rarres1	1325	0.0650107	1.41174	2.23383	0.494424	5.46038	0.00010378	6.1402	9.08876e-06	3.87962	0.00650861	0.67982	0.745771	-1.58076	0.0959224	-2.26058	0.016995
ENSMUSG00000027775.9	Mfsd1	3042	12.8158	27.3762	26.2993	30.6342	1.09637	2.0196e-22	1.03788	3.21964e-20	1.25795	1.07168e-29	-0.0584895	0.851398	0.161581	0.214254	0.22007	0.106352
ENSMUSG00000046999.2	1110032F04Rik	2578	0.0239968	0.134534	0.582681	1.14344	3.78597	0.0456465	6.05263	0.00053976	7.04216	3.36128e-05	2.26666	0.315412	3.2562	0.00723605	0.989537	0.567894
ENSMUSG00000034349.14	Smc4	5210	9.14626	18.2056	24.9208	25.8427	0.993698	0.000474116	1.44733	1.24898e-07	1.49948	2.93133e-08	0.453636	0.417377	0.505783	0.0967152	0.0521468	0.925399
ENSMUSG00000034317.14	Trim59	3352	2.3694	10.4702	15.3927	18.6297	2.14921	9.82173e-09	2.70666	1.97968e-13	2.98152	2.83411e-16	0.557449	0.47326	0.832317	0.0364436	0.274868	0.641827
ENSMUSG00000027782.10	Kpna4	8940	8.97319	13.713	16.2838	24.117	0.61225	8.30067e-05	0.860731	1.10449e-08	1.42682	1.56467e-22	0.248481	0.418558	0.814571	1.36503e-08	0.56609	0.000256774
ENSMUSG00000098207.1	Arl14	1200	0.054151	3.89218	6.23365	8.76942	7.71373	7.72542e-08	8.39896	3.4115e-09	8.8921	2.50837e-10	0.685232	0.661831	1.17838	0.115979	0.493146	0.644616
ENSMUSG00000043300.2	B3galnt1	2028	1.70906	8.66502	7.19443	2.0078	2.35638	8.12142e-05	2.08769	0.000521018	0.237225	0.745459	-0.26869	0.867122	-2.11916	0.000249889	-1.85047	0.00261285
ENSMUSG00000027792.11	Bche	6741	6.0948	0.282683	0.674564	0.307365	-4.46248	9.67985e-09	-3.18522	5.40034e-05	-4.33745	1.56632e-08	1.27726	0.42686	0.125034	0.918487	-1.15223	0.269808
ENSMUSG00000027835.11	Pdcd10	2939	6.96035	10.828	11.7523	14.4713	0.639509	0.000598453	0.759288	3.04353e-05	1.05756	1.7322e-09	0.119778	0.794958	0.418052	0.0253856	0.298274	0.177509
ENSMUSG00000034109.15	Golim4	11072	4.34453	8.52269	8.83882	6.55707	0.972474	1.29715e-11	1.02552	6.50519e-13	0.594152	4.76322e-05	0.0530508	0.898607	-0.378322	0.0121233	-0.431373	0.00541347
ENSMUSG00000061175.12	Fnip2	8698	4.44044	9.59282	6.95787	10.8054	1.11224	0.000197007	0.64817	0.0397833	1.28393	9.11024e-06	-0.464069	0.432272	0.171691	0.656591	0.63576	0.0612822
ENSMUSG00000027811.9	4930579G24Rik	1970	0.909636	2.86043	3.08758	2.67344	1.6772	2.09072e-06	1.79593	2.80754e-07	1.58228	5.61614e-06	0.11873	0.896611	-0.0949129	0.834593	-0.213643	0.67954
ENSMUSG00000027956.11	Tmem144	3487	0.66013	1.44605	1.64753	1.63965	1.15097	3.74676e-06	1.34516	3.31552e-08	1.32988	3.15737e-08	0.194186	0.701998	0.178904	0.502347	-0.0152813	0.973954
ENSMUSG00000027955.16	Gask1b	9598	2.56369	8.94512	8.89221	3.70309	1.80475	1.53946e-06	1.79648	1.54494e-06	0.531737	0.195715	-0.00827591	0.995935	-1.27301	0.000698874	-1.26474	0.0011544
ENSMUSG00000028019.9	Pdgfc	5089	4.21226	8.39127	7.29639	0.889001	0.99649	2.26711e-08	0.793563	1.13663e-05	-2.2479	5.12118e-35	-0.202927	0.603148	-3.24439	4.31275e-86	-3.04146	3.5085e-75
ENSMUSG00000028005.13	Gucy1b1	3927	1.45103	2.79522	2.19419	8.11186	0.952081	0.0726442	0.599913	0.279162	2.4926	8.97826e-08	-0.352168	0.769936	1.54052	0.00115398	1.89269	6.54148e-05
ENSMUSG00000033910.13	Gucy1a1	6968	3.74957	3.72669	2.32681	8.47547	-0.00855493	0.996508	-0.689974	0.312668	1.17794	0.0566156	-0.681419	0.600159	1.1865	0.0621895	1.86792	0.00248601
ENSMUSG00000028004.12	Npy2r	3383	2.16686	1.31712	0.666326	0.012755	-0.72468	0.49889	-1.72552	0.0635619	-10.1081	6.68675e-14	-1.00084	0.599555	-9.38338	5.83848e-12	-8.38254	1.98719e-09
ENSMUSG00000033882.15	Rbm46	2499	0.216854	1.20895	0.62998	0.378448	2.55995	1.64827e-05	1.59607	0.0108872	0.845942	0.199568	-0.963877	0.342938	-1.71401	0.00126579	-0.750129	0.294904
ENSMUSG00000028003.6	Lrat	5351	0.0919012	2.1124	1.00763	1.51045	4.64825	5.43561e-07	3.57216	0.000155868	4.16255	5.97029e-06	-1.07608	0.573913	-0.485702	0.675917	0.590381	0.677209
ENSMUSG00000027996.13	Sfrp2	2153	14.3465	61.0106	30.0505	0.555313	2.08987	0.00147783	1.06783	0.130492	-4.73948	3.86929e-14	-1.02203	0.42686	-6.82935	5.67136e-32	-5.80732	5.82471e-23
ENSMUSG00000027995.10	Tlr2	3014	1.32033	10.1692	7.71957	14.5215	2.95925	2.89356e-07	2.56064	1.04295e-05	3.47388	7.06256e-10	-0.398616	0.787118	0.514626	0.468894	0.913243	0.209423
ENSMUSG00000027993.16	Trim2	19751	11.9363	4.61262	2.15943	1.44363	-1.37208	0.0105322	-2.46873	8.9242e-07	-3.04972	5.56629e-10	-1.09664	0.22448	-1.67764	0.00100717	-0.580992	0.417666
ENSMUSG00000056498.13	Tmem154	4738	0.599426	2.50266	2.75951	5.04335	2.07955	7.0504e-05	2.22094	1.76343e-05	3.09253	6.38926e-10	0.141389	0.924109	1.01298	0.0621267	0.871586	0.161381
ENSMUSG00000031286.6	Glt28d2	2732	2.25842	1.64231	1.87546	3.28056	-0.46159	0.331028	-0.269423	0.585058	0.539826	0.208571	0.192167	0.860651	1.00142	0.0142238	0.809249	0.0786202
ENSMUSG00000028078.14	Dclk2	10553	1.1106	0.798883	0.416898	0.33476	-0.478584	0.417701	-1.42557	0.0046732	-1.74248	0.000343846	-0.946989	0.305629	-1.2639	0.0126218	-0.316906	0.694021
ENSMUSG00000028076.12	Cd1d1	2570	1.33311	3.58649	4.91948	3.84864	1.44077	0.000295407	1.90177	8.14885e-07	1.54276	6.63561e-05	0.460994	0.573904	0.101991	0.849504	-0.359003	0.515872
ENSMUSG00000041734.15	Kirrel	7463	4.27754	21.7478	15.7434	6.25511	2.34765	1.46123e-18	1.88116	2.92092e-12	0.549368	0.0609936	-0.466488	0.396485	-1.79828	1.49527e-12	-1.33179	6.42663e-07
ENSMUSG00000015852.13	Fcrls	2334	1.31095	25.2707	15.9561	3.07071	4.28796	8.23393e-09	3.62344	1.3474e-06	1.24041	0.126981	-0.664523	0.709961	-3.04755	2.87666e-05	-2.38303	0.00239382
ENSMUSG00000028073.15	Pear1	6781	3.15172	7.23014	5.14272	3.82677	1.19934	7.65217e-05	0.707402	0.0267037	0.281246	0.408718	-0.491934	0.413855	-0.91809	0.00235533	-0.426156	0.279667
ENSMUSG00000028072.6	Ntrk1	2588	2.07567	1.36708	0.743857	0.0613542	-0.611477	0.248832	-1.51285	0.00135453	-5.52192	2.11267e-20	-0.901375	0.303959	-4.91045	7.99738e-17	-4.00907	6.04158e-11
ENSMUSG00000005640.11	Insrr	5714	0.256198	1.81417	0.808644	0.0648708	2.86035	0.00485495	1.6837	0.1167	-2.0995	0.0457949	-1.17664	0.573883	-4.95985	1.45047e-07	-3.7832	0.000177725
ENSMUSG00000004896.16	Rrnad1	6342	3.73912	2.12184	2.09251	1.82683	-0.820221	3.53195e-05	-0.843183	1.87043e-05	-1.0374	6.63119e-08	-0.0229623	0.970855	-0.21718	0.361799	-0.194217	0.505076
ENSMUSG00000004891.16	Nes	6416	2.91472	9.27594	8.24665	14.8059	1.67238	6.37199e-05	1.50246	0.000349109	2.34757	5.14692e-09	-0.169916	0.886647	0.675199	0.143663	0.845114	0.0817861
ENSMUSG00000028068.14	Iqgap3	11384	0.493623	2.3535	3.26507	2.69191	2.26211	1.30343e-17	2.73665	1.40247e-25	2.45729	6.47722e-21	0.474546	0.350162	0.195185	0.55791	-0.279361	0.45349
ENSMUSG00000104445.1	Rhbg	1937	0.46411	0.210879	0.324691	1.16805	-1.23638	0.143174	-0.541853	0.543807	1.36765	0.0648436	0.694523	0.692977	2.60402	0.000257498	1.9095	0.0120702
ENSMUSG00000103766.5	Gm38392	1524	1.50046	0.634812	0.787411	1.52899	-1.27526	0.0351723	-0.963182	0.115213	0.0212949	0.979169	0.312081	0.83857	1.29656	0.0267039	0.984476	0.143071
ENSMUSG00000010538.14	Tsacc	1112	2.23567	0.975794	1.08351	0.743871	-1.2231	0.0128648	-1.10137	0.0243454	-1.6341	0.000483158	0.121732	0.932573	-0.411	0.495415	-0.532732	0.43297
ENSMUSG00000001420.13	Tmem79	2912	8.43429	6.24382	7.63739	14.7111	-0.43468	0.473252	-0.142924	0.829723	0.803147	0.123484	0.291755	0.821634	1.23783	0.0146592	0.946071	0.104842
ENSMUSG00000041423.16	Paqr6	2429	1.27019	0.823109	0.704822	0.478318	-0.63196	0.276785	-0.864726	0.11374	-1.44052	0.00468696	-0.232766	0.86572	-0.808558	0.153211	-0.575792	0.419048
ENSMUSG00000028066.15	Pmf1	4063	1.81711	3.69378	4.40569	4.67942	1.02591	1.84638e-05	1.28508	3.88297e-08	1.36839	2.83546e-09	0.259166	0.606593	0.342477	0.185418	0.0833116	0.84378
ENSMUSG00000028064.17	Sema4a	5406	22.8983	14.8862	8.98707	12.4839	-0.621488	0.352629	-1.35069	0.0219736	-0.875696	0.143603	-0.729199	0.542722	-0.254207	0.736931	0.474991	0.575596
ENSMUSG00000028063.15	Lmna	5838	20.0146	50.2575	47.4776	56.8393	1.32859	4.16636e-06	1.24654	1.58126e-05	1.50611	9.03073e-08	-0.082049	0.923325	0.177527	0.639011	0.259576	0.548447
ENSMUSG00000074480.4	Mex3a	5778	3.04966	8.3862	12.0298	8.93484	1.46164	0.00462574	1.98276	6.45073e-05	1.5534	0.0018344	0.521126	0.642411	0.0917603	0.901213	-0.429366	0.563184
ENSMUSG00000008601.12	Rab25	1673	26.9168	19.79	20.1292	51.9987	-0.444187	0.41863	-0.419404	0.435323	0.950365	0.0430465	0.0247832	0.988014	1.39455	0.00214787	1.36977	0.00406014
ENSMUSG00000028059.16	Arhgef2	9844	4.13787	16.9791	18.5601	18.2724	2.03796	5.91526e-17	2.16651	4.01421e-19	2.14404	6.54067e-19	0.12855	0.851994	0.106077	0.758179	-0.0224725	0.966602
ENSMUSG00000105204.1	Gm43738	2635	13.1308	22.5466	32.6715	37.2894	0.780727	0.0305253	1.31674	9.22346e-05	1.50694	4.54385e-06	0.536015	0.426526	0.72621	0.0414591	0.190196	0.734969
ENSMUSG00000059743.12	Fdps	4208	5.57922	11.8101	18.0427	20.2628	1.08332	0.0044808	1.69573	2.83536e-06	1.8626	1.64899e-07	0.61241	0.397087	0.779278	0.0449353	0.166868	0.795475
ENSMUSG00000032657.15	Fam189b	3649	4.87042	4.09731	3.88196	1.81198	-0.250091	0.579438	-0.327749	0.435884	-1.42954	4.53858e-05	-0.0776582	0.942285	-1.17945	0.000880577	-1.10179	0.003176
ENSMUSG00000028048.11	Gba	2559	15.9323	21.7733	22.7105	33.2075	0.451075	0.19909	0.512186	0.129069	1.06003	0.000507996	0.0611111	0.948443	0.60895	0.0641562	0.547839	0.140858
ENSMUSG00000028047.11	Thbs3	4823	1.47632	8.83435	7.92045	3.42985	2.58822	7.98838e-06	2.4302	2.76575e-05	1.22133	0.0440315	-0.158024	0.925341	-1.36689	0.0240506	-1.20887	0.0723161
ENSMUSG00000042784.9	Muc1	2346	0.321573	8.00461	7.40872	70.6137	4.72562	1.29424e-10	4.61428	3.08959e-10	7.86947	2.16919e-28	-0.111348	0.959264	3.14385	3.3376e-06	3.25519	2.07747e-06
ENSMUSG00000042766.17	Trim46	3792	0.921248	1.88997	3.02598	2.29874	1.04523	0.201777	1.72892	0.0211778	1.33082	0.0761553	0.683689	0.676276	0.285585	0.76812	-0.398104	0.736651
ENSMUSG00000042737.9	Dpm3	919	15.392	8.22294	7.46018	6.42978	-0.910215	1.88496e-05	-1.04558	6.63481e-07	-1.26757	7.85391e-10	-0.13537	0.809668	-0.357353	0.138487	-0.221983	0.478989
ENSMUSG00000027953.13	Slc50a1	1466	26.4015	15.4858	13.9269	11.4903	-0.770714	2.66042e-07	-0.923771	4.10957e-10	-1.20241	1.33311e-16	-0.153057	0.664951	-0.431691	0.00585513	-0.278634	0.136901
ENSMUSG00000028044.6	Cks1b	1126	10.6245	18.4296	26.2625	22.8595	0.796131	0.0145996	1.31011	1.83926e-05	1.10846	0.000285688	0.513981	0.391891	0.312327	0.393548	-0.201655	0.678902
ENSMUSG00000042613.9	Pbxip1	4674	75.1643	33.2677	25.8093	20.6636	-1.17604	2.80098e-19	-1.54337	1.14272e-32	-1.86352	1.65297e-47	-0.367333	0.0866525	-0.687486	1.25569e-07	-0.320153	0.0405822
ENSMUSG00000027951.16	Adar	8118	6.7574	12.8049	18.1352	20.8372	0.922986	2.12283e-05	1.42547	1.03452e-11	1.62548	4.07252e-15	0.502484	0.165904	0.702496	0.00110578	0.200012	0.530712
ENSMUSG00000046280.9	She	7222	0.998318	1.7161	1.33412	3.52056	0.784698	0.148533	0.419721	0.466454	1.82469	0.000117286	-0.364977	0.758204	1.03999	0.039023	1.40497	0.00541347
ENSMUSG00000027947.11	Il6ra	8642	1.26949	4.31196	2.72562	4.95191	1.76852	1.60993e-05	1.10396	0.00981541	1.96824	8.59128e-07	-0.664555	0.416371	0.199722	0.713477	0.864278	0.0670556
ENSMUSG00000118506.1	1700094D03Rik	3097	3.38752	1.4605	1.24122	2.22633	-1.22192	0.00211505	-1.46332	0.000169087	-0.608493	0.136823	-0.241399	0.813637	0.61343	0.156324	0.854829	0.0546537
ENSMUSG00000027940.18	Tpm3	6085	28.2059	63.7952	65.9012	80.3955	1.1777	3.35277e-16	1.22473	1.59281e-17	1.51132	1.72537e-26	0.0470229	0.913002	0.333615	0.0353456	0.286593	0.109749
ENSMUSG00000027939.11	Nup210l	5720	0.207092	0.7207	1.02111	0.993025	1.83272	6.71186e-06	2.34282	3.17446e-09	2.30391	4.1876e-09	0.510094	0.498356	0.471185	0.254852	-0.038909	0.958109
ENSMUSG00000027938.11	Creb3l4	1679	1.7223	6.58674	6.17723	3.76359	1.95223	0.0100031	1.8591	0.0136382	1.14126	0.139345	-0.0931335	0.966036	-0.810972	0.336843	-0.717839	0.486974
ENSMUSG00000052310.9	Slc39a1	2364	32.3974	91.1885	86.4943	84.7213	1.49352	3.13155e-18	1.41754	1.5121e-16	1.38727	4.80115e-16	-0.0759844	0.881763	-0.10625	0.648631	-0.0302658	0.933477
ENSMUSG00000027931.12	Npr1	4783	3.49275	2.99213	1.98968	7.28524	-0.223858	0.75911	-0.817158	0.174408	1.06269	0.0587601	-0.5933	0.622137	1.28655	0.0219154	1.87985	0.000622431
ENSMUSG00000042312.10	S100a13	715	5.23291	13.7523	10.8172	12.7829	1.40366	2.29693e-08	1.05228	4.28202e-05	1.2959	1.86284e-07	-0.351388	0.474212	-0.107764	0.733776	0.243623	0.475416
ENSMUSG00000042306.11	S100a14	1727	4.19868	25.954	23.3733	85.7879	2.63533	0.00147749	2.4842	0.00268941	4.36106	2.41514e-08	-0.151134	0.951451	1.72573	0.0439029	1.87686	0.038994
ENSMUSG00000074457.10	S100a16	1617	19.8467	45.5052	46.0774	100.933	1.19824	0.0496344	1.21637	0.0426271	2.34791	2.09047e-05	0.0181327	0.993803	1.14967	0.0562158	1.13154	0.0868083
ENSMUSG00000105518.1	Gm42674	446	12.255	45.9002	20.1743	17.168	1.91271	1.04562e-05	0.721066	0.13509	0.488529	0.312941	-1.19165	0.0683217	-1.42418	0.000864086	-0.232537	0.750145
ENSMUSG00000001020.8	S100a4	584	9.94616	37.4432	15.9471	11.0901	1.92011	0.00036801	0.683685	0.260848	0.159186	0.81068	-1.23643	0.157935	-1.76093	0.000788302	-0.524499	0.494767
ENSMUSG00000001025.8	S100a6	1367	43.6621	256.13	216.65	300.194	2.55329	4.51907e-11	2.31179	2.61956e-09	2.78231	3.21715e-13	-0.241506	0.817755	0.229013	0.662765	0.470519	0.395259
ENSMUSG00000063767.4	S100a7a	1377	0.621944	0.232364	0.845707	2.12505	-1.55538	0.300593	0.462912	0.779225	1.82421	0.172524	2.01829	0.427719	3.3796	0.00911057	1.3613	0.432352
ENSMUSG00000056054.9	S100a8	694	0.309339	15.7854	9.30258	115.781	6.01544	2.30559e-08	5.24985	1.26344e-06	8.89542	1.64297e-17	-0.765593	0.744042	2.87998	0.00266237	3.64557	0.000136944
ENSMUSG00000056071.12	S100a9	522	0.333595	31.3016	16.8561	261.274	6.9976	5.94477e-10	6.10237	7.72416e-08	10.0625	5.79816e-20	-0.895229	0.694469	3.06488	0.00163184	3.96011	3.97534e-05
ENSMUSG00000042250.13	Pglyrp4	2368	0.0630017	1.26386	1.1761	5.6986	4.81642	0.000851832	4.711	0.00104696	7.00499	3.27267e-07	-0.105421	0.979908	2.18857	0.105096	2.29399	0.121874
ENSMUSG00000056270.3	Prr9	1183	1.27187	9.99894	10.4829	9.9187	3.01334	0.00276159	3.08121	0.00197305	3.00127	0.00219416	0.0678676	0.982926	-0.0120714	0.996318	-0.079939	0.969132
ENSMUSG00000078664.2	Sprr2a1	3003	0.213687	9.24715	5.22217	4.41638	5.54265	7.40609e-09	4.71642	1.03937e-06	4.47351	2.98807e-06	-0.826223	0.711432	-1.06913	0.335348	-0.24291	0.893462
ENSMUSG00000068893.5	Sprr2a2	2910	0.225876	9.93087	6.1265	5.11036	5.56159	1.57736e-09	4.86329	1.49367e-07	4.60057	5.54167e-07	-0.698299	0.754137	-0.961014	0.373538	-0.262715	0.877519
ENSMUSG00000074445.4	Sprr2a3	2883	0.763846	46.661	32.3046	38.2687	5.96467	6.44817e-12	5.43398	4.07902e-10	5.67845	4.19715e-11	-0.530685	0.819257	-0.286219	0.81738	0.244466	0.885366
ENSMUSG00000050092.3	Sprr2b	784	0.0550384	0.237191	2.28256	6.14429	3.65828	0.0853781	7.27057	0.000115287	8.7196	1.95335e-06	3.61229	0.119227	5.06133	0.000362326	1.44904	0.459226
ENSMUSG00000042212.3	Sprr2d	681	0.415994	11.1468	12.1155	218.638	4.98257	0.0142834	5.10389	0.0107978	9.28445	7.04047e-07	0.121322	0.985156	4.30188	0.0286715	4.18056	0.0500774
ENSMUSG00000055030.1	Sprr2e	647	0.100435	0.256841	0.567577	7.96085	2.46422	0.37765	3.87974	0.1245	7.855	0.000545877	1.41553	0.776125	5.39078	0.00664238	3.97526	0.072619
ENSMUSG00000050635.1	Sprr2f	609	0.949079	3.15656	4.4479	426.391	1.81218	0.409916	2.31806	0.263391	8.92343	4.03196e-07	0.505888	0.923691	7.11126	4.29742e-05	6.60537	0.000262913
ENSMUSG00000046259.2	Sprr2h	752	0.169358	1.4622	2.31065	40.0404	3.65685	0.101085	4.3411	0.0423133	8.48965	1.50819e-05	0.684248	0.896404	4.8328	0.0111898	4.14855	0.0487714
ENSMUSG00000042157.2	Sprr2i	617	0.0699354	0.119174	0.360798	15.9045	1.4271	0.738637	3.98747	0.255406	9.75257	0.00142046	2.56037	0.718023	8.32547	0.00545645	5.7651	0.0774979
ENSMUSG00000027925.2	Sprr2j-ps	678	0.0636433	0.579763	0.254456	8.74833	4.94535	0.103304	3.51617	0.263399	9.02191	0.000886404	-1.42919	0.826704	4.07656	0.126574	5.50574	0.0474107
ENSMUSG00000042165.8	Gm9774	1392	0.177422	0.400463	0.474213	1.38945	1.32765	0.240679	1.60505	0.134209	3.20867	0.000778688	0.277402	0.910869	1.88102	0.0369483	1.60362	0.113289
ENSMUSG00000054215.2	Sprr2k	637	0.0677396	0.0854602	0.4398	21.4117	0.140472	0.976385	4.38983	0.109405	10.2293	2.78672e-05	4.24936	0.383037	10.0888	1.90464e-05	5.83943	0.0123191
ENSMUSG00000048455.9	Sprr1b	830	0.525433	2.0158	11.154	106.218	2.05498	0.492881	4.555	0.0810297	7.81233	0.001185	2.50002	0.643941	5.75735	0.0208412	3.25733	0.30322
ENSMUSG00000045539.3	Sprr3	1222	0.0353111	0.0971214	0.396635	7.6015	2.73236	0.549693	5.28562	0.186334	9.67298	0.00758229	2.55327	0.765173	6.94062	0.0558492	4.38735	0.327624
ENSMUSG00000050359.7	Sprr1a	806	2.10979	69.4351	73.0428	792.916	5.07895	1.24838e-06	5.15206	7.52176e-07	8.59337	1.38322e-17	0.0731072	0.983142	3.51442	0.000710034	3.44131	0.00143027
ENSMUSG00000049128.7	Ivl	1922	0.0565262	1.17513	1.48258	69.4501	5.11321	0.0068544	5.45352	0.00331777	11.0254	2.27539e-10	0.340314	0.94354	5.91216	0.000122751	5.57184	0.000505081
ENSMUSG00000027913.5	Crct1	792	0.082047	0.239766	1.99174	7.54672	2.72708	0.483985	6.12034	0.0684394	8.07138	0.0109433	3.39326	0.590062	5.3443	0.087302	1.95103	0.667083
ENSMUSG00000052415.5	Tchh	5823	0.437652	1.81625	1.26006	2.91511	2.07081	0.0120793	1.54319	0.0680155	2.75591	0.000395651	-0.527619	0.790155	0.685104	0.472587	1.21272	0.216443
ENSMUSG00000027907.4	S100a11	511	103.455	710.332	708.943	1167.33	2.78059	8.24763e-18	2.77784	7.94038e-18	3.49726	5.34563e-28	-0.00274463	0.999377	0.716674	0.0461482	0.719418	0.0653079
ENSMUSG00000041959.14	S100a10	1212	20.6361	80.8882	77.0563	76.8173	1.97274	4.48877e-18	1.90318	6.40417e-17	1.89833	5.26823e-17	-0.0695614	0.918546	-0.0744086	0.821132	-0.00484724	0.99422
ENSMUSG00000028145.9	Them4	4025	2.54595	1.07346	1.17192	1.21487	-1.25533	5.5703e-07	-1.11355	8.91298e-06	-1.074	1.29864e-05	0.14178	0.83857	0.181325	0.582837	0.0395449	0.940236
ENSMUSG00000028148.11	Them5	1540	0.0280196	0.0708677	2.81352	0.996971	2.52789	0.453767	8.56572	0.00168405	7.04168	0.0097747	6.03783	0.125972	4.51379	0.0901098	-1.52405	0.689067
ENSMUSG00000028150.14	Rorc	3559	18.1945	2.67521	2.52035	1.47907	-2.77071	3.69152e-08	-2.85988	1.0918e-08	-3.62937	1.62365e-13	-0.0891665	0.955945	-0.858666	0.136593	-0.769499	0.250961
ENSMUSG00000041912.12	Tdrkh	6142	1.36095	0.624217	0.476486	0.271227	-1.13218	0.0720998	-1.53395	0.0102965	-2.35168	3.67466e-05	-0.401767	0.785932	-1.2195	0.0504076	-0.817734	0.290047
ENSMUSG00000028139.5	Riiad1	813	1.44552	0.853835	0.64528	1.00602	-0.798623	0.23808	-1.26575	0.0473731	-0.543429	0.401233	-0.467122	0.755737	0.255194	0.746349	0.722316	0.377159
ENSMUSG00000005968.14	Tuft1	3117	5.17208	8.92172	12.0668	11.5847	0.78887	0.00991371	1.22373	2.33502e-05	1.16582	4.63512e-05	0.434864	0.458472	0.376945	0.256682	-0.0579186	0.918624
ENSMUSG00000068874.13	Selenbp1	2273	10.8038	5.83324	5.43434	39.6629	-0.891993	0.158292	-0.992631	0.103632	1.87814	0.000719244	-0.100638	0.953803	2.77013	1.35463e-07	2.87077	6.03828e-08
ENSMUSG00000005628.12	Tmod4	1717	4.83104	1.08916	0.359958	0.289997	-2.17516	0.0254358	-3.8649	2.89201e-05	-4.18445	4.17448e-06	-1.68974	0.355797	-2.00929	0.0450918	-0.319546	0.85941
ENSMUSG00000053769.5	Lysmd1	2394	4.34306	1.38047	1.02414	1.28295	-1.6647	4.20018e-05	-2.10957	1.427e-07	-1.7756	7.51293e-06	-0.444864	0.634992	-0.110896	0.850193	0.333968	0.600619
ENSMUSG00000013707.3	Tnfaip8l2	1122	0.803394	7.11042	4.04039	4.2638	3.22048	1.8864e-05	2.39631	0.00189451	2.47774	0.0010301	-0.82417	0.600635	-0.742738	0.390276	0.0814313	0.957153
ENSMUSG00000038777.19	Sema6c	5935	1.06272	1.47551	0.989704	0.226913	0.475658	0.331434	-0.105546	0.852279	-2.25811	5.72576e-08	-0.581204	0.498905	-2.73377	3.05464e-12	-2.15256	1.55236e-07
ENSMUSG00000028115.16	Bnipl	2297	4.2098	1.95815	1.28923	2.32826	-1.11184	0.179944	-1.72681	0.0248302	-0.862499	0.279642	-0.614966	0.727413	0.249343	0.80625	0.864309	0.393529
ENSMUSG00000038712.16	Mindy1	6458	18.7234	9.98052	8.06557	10.3386	-0.908038	0.00865075	-1.216	0.000252045	-0.857653	0.0107876	-0.30796	0.691044	0.0503847	0.920011	0.358344	0.445761
ENSMUSG00000015702.13	Anxa9	2073	29.7649	3.43328	2.19209	1.01744	-3.12479	6.74432e-07	-3.77892	1.06928e-09	-4.89995	1.21237e-15	-0.654125	0.657477	-1.77516	0.00737841	-1.12103	0.161587
ENSMUSG00000028111.4	Ctsk	1512	5.88027	87.9823	41.2001	48.849	3.90995	8.34247e-07	2.81494	0.000528681	3.06074	0.000114493	-1.095	0.518378	-0.849201	0.376647	0.2458	0.870268
ENSMUSG00000038642.10	Ctss	1358	13.4254	241.844	151.764	164.478	4.17445	1.27033e-11	3.50203	1.64371e-08	3.61819	3.72384e-09	-0.672422	0.638781	-0.556259	0.479777	0.116163	0.927461
ENSMUSG00000038612.16	Mcl1	3418	40.3417	73.7477	66.4531	110.987	0.870599	3.31065e-06	0.720246	0.00014204	1.4604	4.25583e-16	-0.150353	0.746827	0.589802	0.00177972	0.740156	8.24543e-05
ENSMUSG00000015850.11	Adamtsl4	4198	4.28316	2.56062	3.42578	7.17293	-0.744841	0.0457341	-0.322957	0.427685	0.744822	0.0355009	0.421884	0.571677	1.48966	5.61934e-06	1.06778	0.00276462
ENSMUSG00000028108.15	Ecm1	2521	18.3801	83.3415	88.0529	161.85	2.18196	0.00237257	2.26133	0.00143797	3.13963	3.94671e-06	0.0793731	0.970982	0.957673	0.23058	0.8783	0.353823
ENSMUSG00000038543.13	BC028528	1402	0.99108	4.25837	2.98101	7.53381	2.13248	8.6207e-05	1.61477	0.00371233	2.9608	1.23369e-08	-0.517715	0.659158	0.828315	0.142867	1.34603	0.0155524
ENSMUSG00000038526.14	Car14	2543	3.75306	0.136536	0.0456288	0.830284	-4.97146	6.7917e-08	-7.05006	9.84652e-12	-2.19848	0.0169102	-2.0786	0.349438	2.77298	0.00407551	4.85158	6.99765e-06
ENSMUSG00000015749.12	Anp32e	3566	12.3903	16.9736	22.555	26.781	0.454297	0.0623123	0.865741	0.000103988	1.113	2.60236e-07	0.411444	0.336003	0.658704	0.00326297	0.24726	0.426396
ENSMUSG00000045934.15	Mtmr11	3780	2.27206	8.37848	6.2885	2.46519	1.88817	1.7803e-10	1.47268	9.12935e-07	0.119649	0.750129	-0.41549	0.504947	-1.76852	1.70411e-10	-1.35303	3.58308e-06
ENSMUSG00000038486.9	Sv2a	4636	1.05278	0.30116	0.153167	0.0777561	-1.8431	2.41987e-06	-2.86319	1.15826e-12	-3.89617	1.47293e-19	-1.02009	0.16822	-2.05306	8.23976e-06	-1.03298	0.078615
ENSMUSG00000068855.3	H2ac20	520	25.262	47.2001	67.9638	70.0024	0.903844	0.0144933	1.43207	3.9205e-05	1.47377	1.68365e-05	0.528228	0.450348	0.569924	0.138701	0.041696	0.954374
ENSMUSG00000068854.7	H2bc21	2620	5.33374	2.209	2.20623	1.63582	-1.27559	3.388e-06	-1.28012	2.79415e-06	-1.70996	1.63828e-10	-0.00453067	0.996981	-0.434374	0.172485	-0.429843	0.236085
ENSMUSG00000063954.7	H2ac19	528	4.16388	1.72846	1.84645	2.15783	-1.30629	0.000934561	-1.23724	0.00157355	-0.982045	0.0100459	0.0690562	0.956088	0.324248	0.509965	0.255192	0.686979
ENSMUSG00000064220.6	H2ac18	586	4.09425	1.71911	1.57272	1.34218	-1.28762	0.000848978	-1.45244	0.00014952	-1.67466	7.8793e-06	-0.164817	0.886272	-0.38704	0.42979	-0.222222	0.745795
ENSMUSG00000074403.2	H3c13	488	20.273	36.9522	54.3501	53.3534	0.868441	0.0613674	1.42789	0.000912643	1.40003	0.000957967	0.559452	0.531318	0.531591	0.276564	-0.0278611	0.975771
ENSMUSG00000105827.1	H2bc18	381	30.5446	119.368	195.768	189.632	1.97086	1.04824e-06	2.68576	8.8388e-12	2.63937	1.51482e-11	0.714896	0.364307	0.668504	0.136549	-0.0463924	0.956647
ENSMUSG00000015947.10	Fcgr1	2589	0.431458	10.2202	9.03007	3.48046	4.62348	1.21182e-16	4.44341	1.67527e-15	3.06573	5.89864e-08	-0.180071	0.907826	-1.55776	0.00479086	-1.37769	0.0215375
ENSMUSG00000038393.14	Txnip	3123	163.246	106.562	60.177	96.1426	-0.615384	0.230657	-1.44012	0.00147784	-0.763884	0.105067	-0.824733	0.338501	-0.1485	0.811605	0.676233	0.236309
ENSMUSG00000049288.4	Lix1l	3620	7.37947	20.7949	14.9779	7.55206	1.49609	6.87106e-06	1.02248	0.00286252	0.0340977	0.938962	-0.473618	0.497449	-1.462	4.67839e-06	-0.988379	0.00523926
ENSMUSG00000038298.14	Pdzk1	3556	1.67152	1.68254	0.297149	0.112852	0.0101611	0.998853	-2.55135	0.0156275	-4.05336	6.204e-05	-2.56151	0.111699	-4.06352	5.04642e-05	-1.50201	0.271108
ENSMUSG00000057123.14	Gja5	5746	0.523229	2.53631	1.61868	4.40863	2.29389	0.000218213	1.64338	0.0100933	3.09402	1.99702e-07	-0.650512	0.629512	0.800133	0.248612	1.45064	0.0313148
ENSMUSG00000028088.14	Fmo5	5675	3.29595	0.913568	0.608657	1.76659	-1.85827	1.28193e-05	-2.45794	4.26843e-09	-0.904626	0.039927	-0.599676	0.516001	0.95364	0.0354912	1.55332	0.000403841
ENSMUSG00000038205.12	Prkab2	5096	8.66944	4.60802	3.88518	2.71904	-0.913806	0.000216541	-1.16113	1.48561e-06	-1.67753	9.10439e-13	-0.247325	0.661831	-0.763728	0.00205244	-0.516403	0.0723195
ENSMUSG00000038170.15	Pde4dip	16857	10.9176	7.28284	6.53741	3.71973	-0.584302	0.0218993	-0.740324	0.00250876	-1.55344	1.3892e-11	-0.156023	0.800754	-0.969135	3.0163e-05	-0.813112	0.000966057
ENSMUSG00000027875.12	Hmgcs2	3290	14.1267	1.76677	0.383231	0.714913	-3.00873	0.000743479	-5.2635	8.59507e-10	-4.33011	3.85542e-07	-2.25477	0.112432	-1.32137	0.185154	0.933394	0.466237
ENSMUSG00000053398.11	Phgdh	2486	39.9507	11.7297	15.6569	16.3204	-1.76965	1.09076e-10	-1.35213	1.09716e-06	-1.29223	2.56653e-06	0.417525	0.478035	0.477424	0.128284	0.0598996	0.914478
ENSMUSG00000050064.14	Zfp697	8276	15.3953	2.97603	2.03525	1.86774	-2.37298	1.01975e-07	-2.924	2.69563e-11	-3.04635	2.49095e-12	-0.551016	0.580171	-0.673369	0.192653	-0.122353	0.889469
ENSMUSG00000044468.14	Tent5c	6097	35.2588	8.94766	5.07701	3.3699	-1.97923	3.47651e-06	-2.79857	1.62548e-11	-3.38961	1.34461e-16	-0.819336	0.317869	-1.41037	0.00105346	-0.591038	0.302636
ENSMUSG00000051076.8	Vtcn1	2622	1.19473	12.4714	8.72125	7.19309	3.40262	2.93432e-07	2.88474	1.629e-05	2.60726	8.81269e-05	-0.517884	0.753208	-0.79536	0.306127	-0.277476	0.815351
ENSMUSG00000033222.16	Ttf2	7672	1.57552	2.95557	3.74931	3.70537	0.909627	2.12034e-13	1.25718	2.26626e-25	1.23619	7.02433e-25	0.347558	0.0404049	0.32656	0.00555685	-0.020998	0.927189
ENSMUSG00000086564.9	Cd101	3330	0.0621923	1.49427	0.680324	3.67888	4.9116	6.48327e-09	3.76192	1.30793e-05	6.21929	4.73408e-14	-1.14968	0.384167	1.30769	0.0670026	2.45737	0.000272809
ENSMUSG00000027864.9	Ptgfrn	10464	12.3103	31.5812	30.3914	51.8656	1.3595	1.46809e-08	1.30426	5.27124e-08	2.07528	4.72052e-19	-0.0552355	0.940104	0.715787	0.00395056	0.771022	0.00253794
ENSMUSG00000027863.8	Cd2	1741	0.0839004	0.853839	0.522596	3.52825	3.81688	0.000824321	3.07366	0.00832729	5.89412	4.34376e-08	-0.74322	0.728009	2.07724	0.0221521	2.82046	0.00194974
ENSMUSG00000042035.11	Igsf3	8479	6.33201	13.232	10.9976	12.1639	1.06388	0.00114227	0.79724	0.0173504	0.942304	0.00345363	-0.266642	0.728774	-0.121578	0.781686	0.145064	0.797133
ENSMUSG00000033161.10	Atp1a1	4568	413.521	157.511	152.849	138.929	-1.39253	6.33263e-23	-1.43591	2.1148e-24	-1.57364	2.38963e-29	-0.0433795	0.920162	-0.181112	0.298096	-0.137732	0.531561
ENSMUSG00000044313.13	Mab21l3	3610	1.69519	1.12828	0.578698	3.71828	-0.593725	0.411712	-1.56762	0.0125136	1.13771	0.0674621	-0.973894	0.419807	1.73143	0.00400962	2.70532	3.39808e-06
ENSMUSG00000033147.16	Slc22a15	14239	0.778259	1.11501	0.942784	2.68818	0.520268	0.421869	0.27804	0.682926	1.79171	0.000732038	-0.242228	0.868888	1.27144	0.0215312	1.51367	0.00765544
ENSMUSG00000027861.13	Casq2	2736	7.28313	0.999915	1.21423	1.96407	-2.8854	0.000170836	-2.60345	0.00071163	-1.89956	0.0141191	0.281946	0.896691	0.985833	0.26499	0.703886	0.532971
ENSMUSG00000027860.15	Vangl1	7156	6.17023	5.75684	6.69859	13.5881	-0.100152	0.836726	0.118951	0.797768	1.13953	0.0010157	0.219104	0.807637	1.23968	0.000280327	1.02058	0.00557611
ENSMUSG00000027858.13	Tspan2	4755	14.3742	4.82498	3.4041	8.33127	-1.57681	0.030771	-2.08253	0.00284252	-0.787449	0.293439	-0.505723	0.769404	0.789356	0.326194	1.29508	0.113175
ENSMUSG00000027852.14	Nras	5331	10.0202	21.5751	23.7423	28.9543	1.10718	1.91173e-16	1.24593	9.91181e-21	1.53189	3.0849e-31	0.13875	0.662224	0.424716	0.00216576	0.285966	0.0746899
ENSMUSG00000007379.15	Dennd2c	6858	0.619699	1.61963	2.10738	4.72017	1.39429	0.0343651	1.77656	0.00487297	2.94143	7.72835e-07	0.382277	0.807465	1.54714	0.0132373	1.16487	0.105709
ENSMUSG00000027848.12	Olfml3	6161	4.3248	37.1391	23.0391	6.40199	3.10437	2.09986e-11	2.41537	2.61427e-07	0.566946	0.280952	-0.689001	0.488335	-2.53742	1.33579e-08	-1.84842	0.000110912
ENSMUSG00000105053.1	Gm43064	3144	6.39649	5.82299	6.2077	13.7739	-0.135713	0.752714	-0.042945	0.923473	1.10848	0.000445324	0.0927684	0.919905	1.24419	5.18398e-05	1.15142	0.000327312
ENSMUSG00000044165.12	Bcl2l15	2714	0.283063	0.593086	1.14904	12.9113	1.11489	0.305479	2.08982	0.0321024	5.59548	2.0165e-10	0.974927	0.62456	4.48059	8.04902e-08	3.50566	6.56741e-05
ENSMUSG00000027843.13	Ptpn22	6775	0.452134	1.37959	2.03801	8.44676	1.62448	0.0123329	2.19051	0.000420433	4.24406	4.85676e-13	0.566029	0.689133	2.61958	5.91986e-06	2.05355	0.000884032
ENSMUSG00000032913.13	Lrig2	11755	4.5777	3.43779	2.4789	2.07447	-0.414073	0.0493986	-0.887607	4.03305e-06	-1.1437	1.11869e-09	-0.473534	0.137863	-0.729631	0.000131724	-0.256096	0.330605
ENSMUSG00000032902.1	Slc16a1	4426	2.29015	14.519	7.89753	5.00169	2.66944	8.77224e-06	1.79026	0.00389842	1.13028	0.075119	-0.879181	0.482687	-1.53916	0.0131292	-0.65998	0.437932
ENSMUSG00000002228.7	Ppm1j	1814	2.2576	3.86804	4.74899	4.30983	0.783664	0.033331	1.08445	0.00187307	0.943871	0.00643363	0.300784	0.699111	0.160207	0.717121	-0.140577	0.811172
ENSMUSG00000002233.13	Rhoc	1618	21.4597	70.8284	94.787	79.952	1.72395	1.46662e-05	2.14464	3.65807e-08	1.89899	1.01113e-06	0.420683	0.640055	0.175032	0.745723	-0.245651	0.708371
ENSMUSG00000002227.15	Mov10	5607	3.72353	7.32029	10.0782	9.79892	0.976831	0.000467348	1.43925	8.2124e-08	1.39802	1.47877e-07	0.462423	0.388218	0.421185	0.167345	-0.0412382	0.941278
ENSMUSG00000070372.11	Capza1	3781	9.04286	27.914	31.1033	38.9704	1.62741	1.58187e-15	1.78398	1.37497e-18	2.10879	6.95238e-26	0.156571	0.767954	0.481375	0.0291911	0.324804	0.224637
ENSMUSG00000062127.11	Cttnbp2nl	8138	4.66878	13.0524	12.5996	17.7585	1.48463	1.1652e-18	1.43335	1.73035e-17	1.92899	2.32237e-31	-0.0512839	0.918564	0.444363	0.0129818	0.495647	0.00751608
ENSMUSG00000040896.16	Kcnd3	9587	1.95031	0.740797	0.351195	0.0492016	-1.40187	0.243625	-2.49295	0.0227767	-5.44291	1.20968e-07	-1.09107	0.643925	-4.04104	0.000104973	-2.94996	0.0105627
ENSMUSG00000048458.8	Inka2	4781	3.7081	0.576619	0.442333	1.90932	-2.7038	1.30734e-07	-3.09979	1.09338e-09	-0.959986	0.076077	-0.395993	0.769404	1.74381	0.000808598	2.13981	4.24553e-05
ENSMUSG00000074342.3	I830077J02Rik	2865	0.281208	1.65806	1.39456	1.43657	2.6296	1.73884e-05	2.37403	0.000114358	2.42119	6.18164e-05	-0.255568	0.86996	-0.208414	0.788141	0.0471544	0.969006
ENSMUSG00000062778.12	Chia1	1903	0.0325085	0.0286065	0.0226748	5.76377	-0.821282	0.785641	-1.56394	0.565026	8.95219	1.44108e-06	-0.742657	0.906346	9.77347	1.77092e-08	10.5161	1.39152e-09
ENSMUSG00000040809.10	Chil3	1632	0.0379067	0.694573	0.798301	114.511	5.62424	0.000158308	5.83117	7.63148e-05	13.0482	6.41148e-21	0.206923	0.922055	7.42396	1.10249e-32	7.21704	5.92453e-31
ENSMUSG00000040774.15	Cept1	3116	9.45909	15.4559	15.3149	19.6069	0.709085	0.0174532	0.695896	0.0183836	1.052	0.000153885	-0.013189	0.989822	0.342911	0.293295	0.3561	0.346783
ENSMUSG00000040747.9	Cd53	1742	1.52855	30.1972	18.412	41.3972	4.32656	4.8187e-18	3.61139	7.2646e-13	4.78199	4.19056e-22	-0.71517	0.499768	0.455435	0.464132	1.17061	0.0403185
ENSMUSG00000047959.4	Kcna3	1902	0.435996	1.91265	1.02826	1.79115	2.19576	0.00322799	1.28101	0.106166	2.10178	0.00385668	-0.914753	0.530705	-0.0939841	0.927973	0.820769	0.385633
ENSMUSG00000040724.5	Kcna2	11906	32.4872	0.136528	0.054987	0.239706	-7.93308	1.33921e-25	-9.32759	7.66182e-34	-7.10397	3.67694e-21	-1.39451	0.397734	0.829101	0.394699	2.22362	0.0134014
ENSMUSG00000027895.10	Kcnc4	3838	1.93451	0.0316978	0.0593733	0.0401267	-6.50235	2.23695e-21	-5.24738	7.07753e-22	-6.09288	5.67574e-24	1.25497	0.474212	0.409469	0.735427	-0.845498	0.43643
ENSMUSG00000027893.14	Ahcyl1	6690	44.4807	24.9919	22.803	20.873	-0.831781	1.37315e-20	-0.964373	1.89543e-27	-1.09207	3.10989e-35	-0.132592	0.501696	-0.260293	0.00682972	-0.1277	0.308103
ENSMUSG00000014599.10	Csf1	5281	5.31805	17.6989	13.9103	15.1877	1.73626	0.0127613	1.38827	0.0497346	1.51542	0.0262384	-0.347995	0.84538	-0.22084	0.811256	0.127155	0.9236
ENSMUSG00000004032.10	Gstm5	1278	68.7807	8.61335	7.55171	3.34491	-3.00204	1.44927e-22	-3.19394	2.00059e-25	-4.37156	3.9962e-46	-0.191901	0.825828	-1.36952	1.99371e-05	-1.17762	0.000519324
ENSMUSG00000004035.12	Gstm7	1601	19.0461	1.04585	0.759351	0.364121	-4.22009	2.43091e-14	-4.72246	1.68003e-17	-5.80899	6.89957e-25	-0.502371	0.727979	-1.5889	0.01269	-1.08653	0.156445
ENSMUSG00000068762.11	Gstm6	1989	1.04754	0.307383	0.206623	0.231359	-1.84072	0.00783517	-2.52217	0.000233083	-2.28759	0.000590749	-0.681457	0.680582	-0.446872	0.619369	0.234584	0.862397
ENSMUSG00000040562.12	Gstm2	1679	140.125	19.947	14.2245	9.85985	-2.81414	6.88409e-08	-3.30306	1.3959e-10	-3.83219	4.58924e-14	-0.488917	0.695948	-1.01805	0.0788766	-0.529134	0.494757
ENSMUSG00000058135.12	Gstm1	1473	256.92	14.2274	9.10467	26.6697	-4.17738	3.69277e-11	-4.82424	1.17087e-14	-3.26939	2.24472e-07	-0.646861	0.669179	0.907997	0.223434	1.55486	0.0339923
ENSMUSG00000027890.17	Gstm4	1707	5.59491	3.56589	3.05677	2.54631	-0.652833	0.000568001	-0.876937	2.24586e-06	-1.13372	4.2431e-10	-0.224104	0.588901	-0.480888	0.0144797	-0.256784	0.316821
ENSMUSG00000050947.9	Amigo1	5540	7.43833	5.663	4.79856	2.73411	-0.393585	0.37515	-0.634074	0.118238	-1.44535	7.6519e-05	-0.240489	0.80125	-1.05177	0.00537811	-0.811277	0.0570906
ENSMUSG00000068749.9	Psma5	1321	24.795	37.2609	46.7051	52.2348	0.588185	0.018941	0.915395	0.000105815	1.07571	2.88648e-06	0.32721	0.505776	0.487528	0.0510335	0.160318	0.667893
ENSMUSG00000068747.14	Sort1	7569	224.318	21.4527	12.1372	22.1673	-3.38663	5.49961e-16	-4.20897	2.31115e-24	-3.33933	8.64453e-16	-0.82234	0.323338	0.0473043	0.945025	0.869645	0.0916088
ENSMUSG00000068739.13	Sars	5142	42.3801	19.6647	20.8765	22.3239	-1.10829	2.08022e-12	-1.02157	9.31794e-11	-0.925439	3.86206e-09	0.086719	0.843787	0.182855	0.345944	0.0961356	0.723012
ENSMUSG00000040412.17	5330417C22Rik	6304	26.736	12.1273	5.7635	4.18678	-1.14094	0.476171	-2.21539	0.119098	-2.67682	0.0470526	-1.07445	0.732078	-1.53587	0.312896	-0.461423	0.848428
ENSMUSG00000048100.13	Taf13	3155	3.96906	5.38274	5.74953	8.36371	0.439674	0.0281256	0.536636	0.0053405	1.07522	1.7322e-09	0.0969619	0.842275	0.635544	0.00032603	0.538582	0.00441328
ENSMUSG00000027883.15	Gpsm2	3909	4.03579	5.93084	6.9885	9.25377	0.556267	0.155585	0.795117	0.0299413	1.19925	0.000484656	0.23885	0.785066	0.642985	0.0850723	0.404135	0.395159
ENSMUSG00000040339.10	Fam102b	5702	7.41381	15.79	15.991	19.6616	1.09128	1.80211e-06	1.11008	1.02639e-06	1.40792	2.18767e-10	0.0187972	0.980421	0.316634	0.227226	0.297836	0.334298
ENSMUSG00000040322.10	Slc25a24	3431	3.75845	28.3989	23.6631	30.2264	2.92212	1.56262e-25	2.65899	2.48655e-21	3.01189	2.33952e-27	-0.263131	0.699323	0.0897627	0.824887	0.352894	0.372808
ENSMUSG00000074264.12	Amy1	3446	1.9011	0.902309	0.926174	0.752411	-1.08039	1.83682e-06	-1.05243	2.98429e-06	-1.35801	8.38217e-10	0.0279589	0.97014	-0.277627	0.320197	-0.305586	0.338763
ENSMUSG00000027966.20	Col11a1	12744	0.50305	19.4099	16.1095	0.254026	5.28002	6.1695e-14	5.01115	1.01608e-12	-0.997438	0.21105	-0.268873	0.896138	-6.27746	5.38691e-22	-6.00859	6.13065e-20
ENSMUSG00000045092.8	S1pr1	3046	2.20997	11.5983	11.4693	32.9482	2.3997	4.24071e-06	2.38401	4.48354e-06	3.90736	5.99353e-15	-0.015692	0.994401	1.50766	0.00424442	1.52335	0.00577022
ENSMUSG00000054414.4	Slc30a7	11116	21.4543	10.2901	9.01176	8.16455	-1.06036	1.65585e-11	-1.25179	8.89023e-16	-1.39472	1.53642e-19	-0.191437	0.592805	-0.33436	0.0555943	-0.142923	0.558343
ENSMUSG00000027963.14	Extl2	3447	11.2867	6.25721	5.55191	4.1197	-0.852642	2.57977e-06	-1.02286	1.02528e-08	-1.45807	8.36256e-17	-0.170217	0.693491	-0.605432	0.00104443	-0.435215	0.0377128
ENSMUSG00000027962.14	Vcam1	8870	1.6349	7.47165	4.40585	3.39654	2.19572	0.000250659	1.43299	0.0216397	1.0574	0.091443	-0.76273	0.546749	-1.13833	0.0754773	-0.375599	0.698189
ENSMUSG00000068696.6	Gpr88	3504	0.87466	1.53156	0.605926	0.13986	0.817055	0.226667	-0.547604	0.436751	-2.74822	6.60423e-06	-1.36466	0.163425	-3.56527	6.282e-10	-2.20062	0.000604277
ENSMUSG00000000340.10	Dbt	3348	12.9558	6.92876	6.3534	5.14986	-0.904954	2.32661e-06	-1.0292	5.44374e-08	-1.33151	7.01444e-13	-0.124249	0.804696	-0.426557	0.0391405	-0.302308	0.225063
ENSMUSG00000027959.14	Sass6	6121	0.997444	2.0937	2.78375	2.81925	1.07932	1.4104e-14	1.49579	4.8118e-28	1.51032	4.67789e-29	0.416467	0.0120959	0.430997	0.000291807	0.0145297	0.9536
ENSMUSG00000033386.10	Frrs1	7260	1.7768	7.72778	7.61083	12.0305	2.12501	8.57633e-10	2.10318	1.08463e-09	2.76359	3.06786e-16	-0.0218274	0.986023	0.638584	0.0958402	0.660411	0.117076
ENSMUSG00000033377.14	Palmd	7273	1.37958	2.52786	3.61466	4.61011	0.876877	0.00317346	1.39461	7.59174e-07	1.74482	2.30668e-10	0.517737	0.342938	0.867941	0.002071	0.350204	0.357957
ENSMUSG00000028007.13	Snx7	6147	1.31603	4.82844	5.46054	5.4972	1.88058	3.58029e-25	2.05996	3.15687e-30	2.06849	8.96654e-31	0.179378	0.657928	0.18791	0.374366	0.00853231	0.98356
ENSMUSG00000033308.16	Dpyd	8884	2.69085	0.28206	0.360821	0.269463	-3.27529	5.29502e-20	-2.91169	2.72566e-16	-3.3533	2.92797e-21	0.363595	0.688854	-0.0780124	0.892603	-0.441607	0.412976
ENSMUSG00000028134.11	Ptbp2	9175	6.6971	4.08437	3.61659	2.34089	-0.714198	0.00552755	-0.891278	0.00035336	-1.51826	1.9226e-10	-0.177081	0.777826	-0.804067	0.00119142	-0.626987	0.022566
ENSMUSG00000028133.17	Rwdd3	5065	1.06164	0.417814	0.445707	0.311658	-1.36061	0.00218468	-1.27731	0.00388064	-1.80405	2.30367e-05	0.0833006	0.950771	-0.443443	0.408382	-0.526744	0.387765
ENSMUSG00000028132.15	Tlcd4	7874	6.41911	3.13428	1.69524	2.00427	-1.03535	0.187439	-1.92519	0.0068108	-1.68162	0.0170745	-0.889842	0.546749	-0.646271	0.443761	0.24357	0.849498
ENSMUSG00000053931.11	Cnn3	3037	100.998	74.3257	73.6838	46.8656	-0.442561	0.0456201	-0.454854	0.0364853	-1.10799	2.12215e-08	-0.0122933	0.986671	-0.665427	0.00112397	-0.653134	0.00217679
ENSMUSG00000039865.8	Slc44a3	5057	14.55	5.6061	5.24695	4.69336	-1.37697	0.000643859	-1.47349	0.000217285	-1.63368	2.71127e-05	-0.0965149	0.935335	-0.256713	0.617227	-0.160198	0.823684
ENSMUSG00000028128.13	F3	2527	3.01627	16.3166	16.1681	14.6457	2.44282	9.1712e-06	2.42968	9.40071e-06	2.28703	2.56099e-05	-0.0131399	0.995806	-0.155798	0.84113	-0.142658	0.893182
ENSMUSG00000028124.15	Gclm	6291	24.7133	9.09541	7.4923	6.98739	-1.4425	3.64694e-17	-1.72398	3.33304e-24	-1.82318	3.48399e-27	-0.281488	0.436917	-0.380687	0.0474331	-0.0991989	0.744032
ENSMUSG00000028121.8	Bcar3	5604	4.69754	5.93351	7.44115	13.963	0.337645	0.229975	0.666031	0.00827955	1.57322	1.36486e-11	0.328386	0.520515	1.23558	4.74881e-08	0.907193	0.000179025
ENSMUSG00000053965.10	Pde5a	9831	6.24034	3.17962	3.83755	12.1579	-0.973714	0.00380354	-0.701028	0.0428258	0.962781	0.00315015	0.272686	0.728009	1.93649	9.68237e-11	1.66381	6.65736e-08
ENSMUSG00000054091.9	1810037I17Rik	1160	22.8107	41.8563	43.7359	94.0374	0.876763	0.0839286	0.9405	0.0566998	2.04512	5.24196e-06	0.0637373	0.964552	1.16836	0.0137113	1.10462	0.031302
ENSMUSG00000039234.11	Sec24d	6325	25.0127	22.6059	20.5404	11.3788	-0.146124	0.60495	-0.284212	0.256528	-1.13695	9.63433e-08	-0.138089	0.808749	-0.99083	2.36179e-06	-0.852741	0.00010939
ENSMUSG00000027978.9	Prss12	2602	0.383427	1.7629	3.6567	10.0293	2.25265	0.0113512	3.31456	8.56866e-05	4.77317	4.26932e-09	1.0619	0.542559	2.52051	0.00207694	1.45861	0.140419
ENSMUSG00000046561.9	Arsj	3859	0.280925	5.14327	2.36895	0.27884	4.24858	4.5907e-14	3.12649	4.8012e-08	-0.00574113	0.996496	-1.12209	0.254749	-4.25432	5.66998e-17	-3.13223	3.92885e-09
ENSMUSG00000032826.19	Ank2	35510	1.5553	0.818635	0.669689	0.124817	-0.927177	0.0171415	-1.21732	0.00110665	-3.65127	3.18932e-25	-0.290141	0.750042	-2.7241	7.65587e-16	-2.43396	1.75319e-12
ENSMUSG00000027968.11	Larp7	2366	5.81579	9.78469	12.8356	12.661	0.751403	0.000533315	1.14605	3.37929e-08	1.12424	4.56752e-08	0.394644	0.315741	0.372835	0.100152	-0.0218095	0.95943
ENSMUSG00000051278.12	Zgrf1	10553	0.562574	1.18473	1.39386	1.1372	1.07942	2.5796e-05	1.31786	1.49644e-07	1.02285	5.06338e-05	0.23844	0.673167	-0.0565656	0.873364	-0.295006	0.378146
ENSMUSG00000028028.11	Alpk1	6868	1.22922	3.46605	3.60709	2.08391	1.50121	2.19492e-05	1.55643	9.23409e-06	0.765083	0.0376477	0.0552197	0.959229	-0.736124	0.0477933	-0.791344	0.0458646
ENSMUSG00000046688.14	Tifa	3199	0.816209	6.82132	6.39199	2.38265	3.08576	3.42647e-07	2.99024	7.41326e-07	1.56346	0.0129276	-0.0955281	0.959134	-1.52231	0.0144372	-1.42678	0.0348336
ENSMUSG00000050549.8	Fam241a	2265	5.40838	2.37449	1.71752	3.16298	-1.19142	2.46242e-06	-1.67127	2.29877e-11	-0.777337	0.00213204	-0.479852	0.349334	0.414082	0.147357	0.893934	0.000793743
ENSMUSG00000028024.14	Enpep	4706	0.958107	0.856708	0.767659	6.72999	-0.162921	0.870152	-0.324888	0.722016	2.82469	3.86109e-05	-0.161967	0.938478	2.98761	7.67854e-06	3.14957	3.27756e-06
ENSMUSG00000041220.10	Elovl6	6431	9.67362	2.17409	3.71745	5.03998	-2.15789	3.91323e-09	-1.38064	0.000244451	-0.942236	0.0136461	0.777245	0.254508	1.21565	0.00120279	0.438406	0.399718
ENSMUSG00000028017.7	Egf	11275	23.2914	3.80306	1.27237	0.0559949	-2.61575	0.0309762	-4.19934	0.000222342	-8.80208	8.09017e-16	-1.58359	0.505736	-6.18633	9.04236e-09	-4.60274	6.03319e-05
ENSMUSG00000058952.12	Cfi	2220	0.525845	5.34037	3.49583	1.69257	3.39332	3.30123e-09	2.7787	1.65641e-06	1.72626	0.003781	-0.614627	0.613016	-1.66707	0.00288276	-1.05244	0.114027
ENSMUSG00000027999.15	Pla2g12a	3682	9.75151	4.59413	3.57481	2.66551	-1.08807	5.8496e-08	-1.45166	2.04162e-13	-1.87422	8.6996e-22	-0.363595	0.370588	-0.786154	0.000112933	-0.422559	0.0863462
ENSMUSG00000027997.9	Casp6	5584	2.94732	6.2508	5.55826	5.5648	1.08686	5.48537e-05	0.918009	0.000752633	0.918207	0.000604845	-0.168853	0.805193	-0.168655	0.622662	0.000198183	1
ENSMUSG00000027994.14	Mcub	1318	1.36083	8.15112	6.30666	6.52229	2.61346	6.98479e-11	2.24198	2.78951e-08	2.28856	9.66249e-09	-0.371482	0.673778	-0.324905	0.492435	0.0465768	0.953986
ENSMUSG00000058897.18	Col25a1	13028	0.0276265	1.52749	0.467351	0.0174729	5.98541	1.72315e-13	4.26869	2.52708e-07	-0.733618	0.481162	-1.71672	0.170258	-6.71902	1.23301e-19	-5.00231	8.93956e-11
ENSMUSG00000027985.14	Lef1	8788	3.31481	1.01832	0.422863	0.471744	-1.70815	0.0257667	-2.99063	3.0339e-05	-2.82514	6.70993e-05	-1.28248	0.362496	-1.11699	0.168257	0.16549	0.906627
ENSMUSG00000050931.7	Sgms2	6227	18.1227	0.890388	0.6252	0.736873	-4.35742	3.46429e-51	-4.87749	9.81454e-63	-4.63043	9.19415e-58	-0.520067	0.419807	-0.273003	0.492489	0.247064	0.623082
ENSMUSG00000028031.6	Dkk2	3705	3.26293	16.0503	14.7967	11.477	2.30245	0.0195521	2.18517	0.0257337	1.81828	0.061231	-0.117286	0.967713	-0.484175	0.694145	-0.36689	0.827548
ENSMUSG00000040998.18	Npnt	5026	6.27312	26.1064	23.1908	49.1901	2.05875	4.64488e-05	1.88796	0.000196417	2.97294	9.391e-10	-0.170794	0.905196	0.914191	0.0969294	1.08498	0.0619396
ENSMUSG00000028018.15	Gstcd	5401	1.9156	3.18293	3.68759	3.89874	0.735144	0.00213779	0.951523	3.92572e-05	1.02989	5.41233e-06	0.216379	0.680582	0.294749	0.257414	0.0783692	0.851282
ENSMUSG00000040969.14	Arhgef38	8190	4.99698	1.64541	1.26233	1.49661	-1.60544	0.00262648	-1.99138	0.000124867	-1.74243	0.000735797	-0.385939	0.769058	-0.13699	0.853137	0.248948	0.78429
ENSMUSG00000044365.15	Cxxc4	13401	2.06935	0.434152	0.262239	0.0390707	-2.26096	0.00895882	-2.99945	0.00031809	-5.84049	6.96858e-13	-0.738492	0.708446	-3.57953	1.49589e-05	-2.84104	0.00136911
ENSMUSG00000045328.11	Cenpe	8620	0.978006	6.68467	9.00443	8.27027	2.78003	3.06593e-16	3.2107	1.63773e-21	3.08762	4.21856e-20	0.430675	0.565832	0.307595	0.473261	-0.12308	0.848773
ENSMUSG00000028167.15	Bdh2	4250	1.60885	0.79169	0.353962	0.211017	-1.03245	0.0312629	-2.23244	7.1796e-07	-2.98078	2.97542e-11	-1.19999	0.100154	-1.94833	2.06867e-05	-0.748338	0.228314
ENSMUSG00000028164.15	Manba	6971	2.83743	8.79868	7.19053	7.25513	1.63522	6.60563e-10	1.34381	4.92603e-07	1.35646	2.7826e-07	-0.291411	0.627166	-0.278766	0.388247	0.0126451	0.984131
ENSMUSG00000028163.17	Nfkb1	12061	6.38741	11.2491	11.9259	15.9397	0.816947	2.27022e-07	0.901466	7.63009e-09	1.31975	4.13784e-18	0.0845193	0.843666	0.502806	0.00158543	0.418286	0.0160207
ENSMUSG00000054690.17	Emcn	5409	1.67569	4.32051	4.02682	2.80193	1.3701	0.000186031	1.26944	0.000546479	0.744713	0.0493371	-0.10066	0.923691	-0.625384	0.113004	-0.524724	0.258917
ENSMUSG00000046818.7	Ddit4l	2916	3.73333	2.78738	6.84412	0.254097	-0.423895	0.673347	0.877151	0.320789	-3.95302	2.09913e-07	1.30105	0.388714	-3.52912	2.76523e-06	-4.83017	3.64873e-11
ENSMUSG00000028159.14	Dapp1	4124	1.59638	5.6876	5.26819	6.22869	1.84105	2.35004e-14	1.72895	8.03296e-13	1.97053	1.30666e-16	-0.112105	0.863643	0.129471	0.680177	0.241576	0.480883
ENSMUSG00000028158.14	Mttp	6206	1.62446	0.718047	0.816442	0.890151	-1.18562	0.00111601	-0.993181	0.00672558	-0.869476	0.0162463	0.192436	0.842	0.316141	0.473579	0.123705	0.851801
ENSMUSG00000004127.12	Trmt10a	7976	0.509266	0.718743	0.95032	1.32036	0.501205	0.0774104	0.913397	0.000399858	1.38673	1.45269e-08	0.412192	0.388174	0.885523	0.000153268	0.473331	0.0885519
ENSMUSG00000074207.10	Adh1	2233	111.346	10.6207	4.60694	6.90813	-3.39244	0.000218289	-4.60214	2.41661e-07	-4.0142	6.14283e-06	-1.2097	0.53208	-0.621762	0.595792	0.587935	0.691705
ENSMUSG00000028152.10	Tspan5	7389	5.59244	3.17953	2.42266	3.51145	-0.815769	0.00206586	-1.21137	1.91085e-06	-0.67202	0.0102422	-0.395601	0.449749	0.143749	0.671954	0.539351	0.072621
ENSMUSG00000059921.15	Unc5c	19135	0.110949	1.36594	0.791681	0.352796	3.64867	6.85444e-05	2.8606	0.00217128	1.68928	0.0791078	-0.788072	0.713467	-1.95939	0.0408061	-1.17132	0.335558
ENSMUSG00000052430.15	Bmpr1b	5962	36.9914	3.00939	3.32012	0.332536	-3.62285	4.609e-07	-3.48104	1.21949e-06	-6.82884	9.8268e-23	0.141815	0.949268	-3.20598	5.963e-06	-3.3478	3.09508e-06
ENSMUSG00000028273.15	Pdlim5	8877	11.6932	28.396	25.2004	21.3654	1.28037	1.71487e-09	1.10813	2.16339e-07	0.869772	5.06338e-05	-0.172232	0.748324	-0.410594	0.0824783	-0.238362	0.438576
ENSMUSG00000105504.4	Gbp5	6637	0.601927	1.38885	2.34573	2.45181	1.21582	0.0358604	1.97515	0.000258425	2.0394	0.000121151	0.759324	0.492528	0.823575	0.165327	0.0642507	0.954082
ENSMUSG00000040253.15	Gbp7	5614	1.77383	6.59996	9.76852	9.70823	1.89943	3.77044e-14	2.46614	1.6747e-23	2.4568	1.63912e-23	0.566708	0.191903	0.557368	0.0366598	-0.00934016	0.987054
ENSMUSG00000028268.14	Gbp3	3265	1.33578	8.74723	16.9445	13.177	2.72333	9.45658e-14	3.67878	1.22681e-24	3.31526	2.67154e-20	0.955457	0.0933954	0.591937	0.145531	-0.36352	0.491304
ENSMUSG00000028270.12	Gbp2	2516	3.57459	15.0853	25.5958	25.1116	2.08302	2.36485e-07	2.84662	4.69456e-13	2.81886	5.68319e-13	0.763601	0.320011	0.735844	0.0950152	-0.0277564	0.97511
ENSMUSG00000040213.13	Kyat3	9518	1.1351	0.317297	0.275916	0.226117	-1.85396	1.1033e-10	-2.05875	6.80734e-13	-2.34873	1.60112e-16	-0.204784	0.798081	-0.494773	0.155555	-0.289989	0.532023
ENSMUSG00000028266.17	Lmo4	3530	22.5069	12.4454	11.069	9.44634	-0.854971	1.79188e-08	-1.02632	7.3006e-12	-1.25401	2.11778e-17	-0.171347	0.622368	-0.399044	0.0133133	-0.227696	0.262559
ENSMUSG00000040151.9	Hs2st1	8209	7.39828	16.2208	13.0671	11.9534	1.13318	1.24532e-08	0.820872	5.34408e-05	0.69286	0.000638936	-0.312312	0.444921	-0.440323	0.040302	-0.128011	0.699952
ENSMUSG00000037062.13	Sh3glb1	7467	14.3892	28.0887	27.9621	29.9019	0.965336	5.44517e-13	0.958968	6.46637e-13	1.05551	1.2677e-15	-0.00636727	0.990177	0.090171	0.611284	0.0965383	0.659
ENSMUSG00000028262.13	Clca3a2	3974	6.02337	4.78338	5.14768	0.386973	-0.333121	0.812393	-0.227688	0.870064	-3.99697	7.0231e-05	0.105433	0.974171	-3.66385	0.000267492	-3.76928	0.000263848
ENSMUSG00000037033.9	Clca3b	3361	0.160378	4.87098	4.2804	4.36326	5.04785	0.000373245	4.86088	0.000592163	4.88877	0.000439699	-0.186962	0.964817	-0.159074	0.940238	0.0278879	0.994284
ENSMUSG00000028255.6	Clca1	3777	0.307082	4.61164	7.78376	4.46791	3.96251	0.000399594	4.719	1.62832e-05	3.91669	0.000349615	0.756495	0.783913	-0.0458171	0.980067	-0.802312	0.636696
ENSMUSG00000036960.10	Clca2	4646	0.151257	1.79379	1.70116	5.62404	3.65224	0.00380734	3.57623	0.00432072	5.30624	8.37795e-06	-0.0760118	0.985537	1.654	0.223054	1.73002	0.262432
ENSMUSG00000028197.4	Col24a1	7621	0.283981	3.94546	2.15583	0.182922	3.82406	5.13352e-13	2.95051	3.75769e-08	-0.649459	0.295056	-0.873553	0.406837	-4.47352	4.08237e-20	-3.59997	7.07249e-13
ENSMUSG00000028195.4	Ccn1	2019	7.19417	77.8429	56.5671	41.2743	3.43973	5.27225e-20	2.97889	2.94967e-15	2.52422	2.42814e-11	-0.460839	0.590062	-0.915515	0.0252587	-0.454676	0.401916
ENSMUSG00000028194.15	Ddah1	3983	0.439408	20.8733	11.6274	4.57235	5.60633	7.25007e-28	4.7616	2.30323e-20	3.41339	5.2745e-11	-0.84473	0.41145	-2.19294	8.96726e-06	-1.34821	0.0166115
ENSMUSG00000028191.11	Bcl10	4564	5.74077	10.8174	10.7155	14.8772	0.915255	0.00012077	0.90243	0.000140445	1.37499	1.46002e-09	-0.0128257	0.988014	0.459735	0.0678843	0.472561	0.0846097
ENSMUSG00000036863.12	Syde2	5751	8.21822	2.872	2.42205	2.0802	-1.51892	6.41318e-06	-1.76852	9.81209e-08	-1.98537	1.2077e-09	-0.249606	0.77177	-0.466452	0.233176	-0.216846	0.698243
ENSMUSG00000036853.5	Mcoln3	3467	0.484945	0.360672	0.197289	1.61846	-0.437882	0.735504	-1.36721	0.214756	1.76573	0.080195	-0.929323	0.683961	2.20361	0.0284583	3.13294	0.00179925
ENSMUSG00000011008.13	Mcoln2	3288	7.8047	2.64149	1.04673	0.316542	-1.56745	0.0501259	-2.91817	8.0916e-05	-4.67718	8.67464e-11	-1.35073	0.349101	-3.10973	1.96363e-05	-1.759	0.0401965
ENSMUSG00000036832.5	Lpar3	2464	0.108546	0.154015	0.135852	1.31052	0.584264	0.637723	0.409067	0.744643	3.82608	2.1793e-05	-0.175198	0.948634	3.24182	7.36823e-05	3.41701	4.80894e-05
ENSMUSG00000028185.12	Dnase2b	2790	2.37961	15.1713	2.59492	0.0449921	2.68047	0.246892	0.125767	0.968362	-6.32774	0.00227549	-2.55471	0.550008	-9.00821	5.92433e-06	-6.45351	0.00297687
ENSMUSG00000090202.1	4930503B20Rik	2404	0.660736	2.13483	1.59004	0.697234	1.72093	0.0393593	1.2885	0.131279	0.0849949	0.934316	-0.432429	0.830308	-1.63593	0.0442571	-1.2035	0.215274
ENSMUSG00000036745.15	Ttll7	8266	2.2326	2.58302	3.59386	8.54877	0.210567	0.670791	0.689248	0.0934085	1.93946	1.08264e-07	0.478682	0.553294	1.72889	1.29354e-06	1.25021	0.00119442
ENSMUSG00000039167.12	Adgrl4	5704	1.22755	5.08778	4.40172	10.383	2.05893	1.8247e-08	1.85	4.70791e-07	3.08944	2.81053e-18	-0.208933	0.829727	1.0305	0.00556662	1.23944	0.000933581
ENSMUSG00000028037.13	Ifi44	6129	0.323786	5.07158	13.229	15.9188	4.00322	3.71257e-14	5.38769	3.70971e-25	5.65457	7.92822e-28	1.38447	0.0913756	1.65135	0.00171398	0.26688	0.767826
ENSMUSG00000039131.15	Gipc2	3839	0.188915	4.46704	5.07347	7.35529	4.65366	2.05445e-17	4.83812	8.06993e-19	5.3741	2.98312e-23	0.184465	0.897643	0.720441	0.20839	0.535976	0.456114
ENSMUSG00000039103.12	Nexn	3826	6.33713	5.99192	5.00888	2.72889	-0.0805615	0.76959	-0.341492	0.125994	-1.21769	6.79966e-10	-0.26093	0.545896	-1.13713	2.0682e-09	-0.876198	1.30286e-05
ENSMUSG00000054942.13	Miga1	11605	4.78072	2.10826	1.91216	2.20587	-1.18215	0.000128737	-1.32475	1.33702e-05	-1.11833	0.000227997	-0.1426	0.865765	0.0638244	0.888141	0.206424	0.676176
ENSMUSG00000039058.11	Ak5	3404	0.322266	1.51	0.910337	0.277711	2.27164	0.000164603	1.5285	0.0148875	-0.226592	0.763765	-0.743144	0.537476	-2.49823	7.76805e-06	-1.75509	0.00457575
ENSMUSG00000052544.9	St6galnac3	8994	2.78361	0.571588	0.363322	0.49876	-2.29436	3.07675e-06	-2.95035	1.09462e-09	-2.49115	2.28389e-07	-0.655989	0.542957	-0.196789	0.774535	0.4592	0.539532
ENSMUSG00000028199.18	Cryz	6195	0.889821	1.54193	1.6962	1.86729	0.797387	0.0267661	0.938784	0.00696771	1.07582	0.00137004	0.141397	0.878846	0.278437	0.494038	0.13704	0.814953
ENSMUSG00000040016.16	Ptger3	5688	3.22525	8.0316	4.94911	0.193748	1.31837	0.0212985	0.617874	0.320424	-4.10538	1.09332e-14	-0.700497	0.541276	-5.42375	5.13992e-28	-4.72325	4.38233e-21
ENSMUSG00000028179.12	Cth	2791	6.52315	0.815735	0.855551	1.34154	-3.02708	3.62272e-11	-2.95206	9.0895e-11	-2.29482	3.93888e-07	0.0750153	0.959978	0.732254	0.174267	0.657239	0.299588
ENSMUSG00000028175.15	Depdc1a	3323	0.275757	2.37982	3.54937	3.50007	3.17575	2.16646e-08	3.75791	1.68201e-11	3.73635	1.59783e-11	0.582163	0.622137	0.5606	0.376776	-0.0215632	0.985585
ENSMUSG00000028173.10	Wls	8792	13.4895	21.0671	25.6015	29.2286	0.643336	0.0472479	0.924841	0.00251366	1.11577	0.000162734	0.281505	0.687959	0.472433	0.158484	0.190927	0.695873
ENSMUSG00000042228.14	Lyn	4073	10.2835	18.8467	15.6218	23.8266	0.874834	0.0125198	0.603351	0.0958538	1.21325	0.000228951	-0.271482	0.737139	0.338412	0.397505	0.609895	0.128162
ENSMUSG00000042198.12	Chchd7	4060	3.92944	1.42713	1.44161	1.12462	-1.4669	6.44058e-22	-1.46345	6.13019e-22	-1.81692	6.65499e-33	0.00345141	0.996286	-0.350022	0.055395	-0.353473	0.0749482
ENSMUSG00000045573.9	Penk	1634	21.4961	131.433	67.9736	0.749971	2.61369	0.00745513	1.66199	0.103454	-4.8888	9.24284e-08	-0.951699	0.657313	-7.50249	8.98185e-19	-6.55079	3.59502e-14
ENSMUSG00000041272.11	Tox	7609	3.29712	0.840041	0.595603	0.216123	-1.97932	8.75837e-05	-2.48286	5.1787e-07	-3.96315	4.19072e-16	-0.503538	0.66868	-1.98383	8.33225e-05	-1.48029	0.00775624
ENSMUSG00000041261.9	Car8	3853	0.824071	3.62741	5.02104	6.04058	2.15356	0.0124727	2.62288	0.00164557	2.89108	0.000371343	0.469326	0.827085	0.737522	0.45912	0.268196	0.860004
ENSMUSG00000041235.12	Chd7	13786	2.87386	5.42969	6.3612	8.08477	0.918777	0.00732317	1.14718	0.000535694	1.49349	2.98045e-06	0.228404	0.78366	0.574715	0.109779	0.346311	0.457985
ENSMUSG00000051279.2	Gdf6	3532	0.0298771	1.68943	1.49108	0.895498	6.58332	8.07915e-07	6.39822	1.541e-06	5.65902	1.98822e-05	-0.185095	0.952179	-0.9243	0.451308	-0.739205	0.637291
ENSMUSG00000049969.3	Plekhf2	3039	11.086	9.04884	11.4006	18.865	-0.29307	0.287087	0.0421458	0.897578	0.76764	0.00100466	0.335216	0.493209	1.06071	1.77753e-06	0.725494	0.00284169
ENSMUSG00000028212.16	Ccne2	3495	0.4423	3.69173	6.04956	7.38109	3.10326	6.30563e-12	3.81967	8.4118e-18	4.10586	1.24583e-20	0.716411	0.401368	1.0026	0.026155	0.286188	0.678062
ENSMUSG00000078773.11	Rad54b	5782	0.533415	1.22973	1.78934	1.71139	1.21398	0.00022188	1.7627	2.301e-08	1.69659	5.89585e-08	0.548711	0.353647	0.482608	0.155679	-0.0661032	0.91156
ENSMUSG00000028214.13	Gem	2104	1.56211	1.72397	1.36042	2.87937	0.14159	0.824234	-0.205577	0.731741	0.892051	0.0602578	-0.347167	0.757657	0.750461	0.129929	1.09763	0.0282302
ENSMUSG00000028217.11	Cdh17	4474	0.791969	4.95695	1.96692	0.262278	2.66084	0.0153605	1.3225	0.265204	-1.62643	0.146701	-1.33835	0.545143	-4.28727	2.07353e-05	-2.94892	0.00854044
ENSMUSG00000055963.12	Triqk	3568	0.960867	1.27259	1.03788	0.353776	0.409516	0.227972	0.108401	0.78314	-1.46403	1.88969e-06	-0.301116	0.638781	-1.87355	3.22359e-11	-1.57243	9.23538e-08
ENSMUSG00000006586.15	Runx1t1	7959	0.914242	1.03653	0.805882	0.442839	0.182195	0.790713	-0.18381	0.782974	-1.05369	0.04487	-0.366005	0.77177	-1.23589	0.0182016	-0.869881	0.161791
ENSMUSG00000043252.8	Tmem64	4670	21.6839	36.7519	23.329	10.8575	0.761477	0.23808	0.105442	0.891951	-0.998411	0.0901736	-0.656035	0.592475	-1.75989	0.00165599	-1.10385	0.0948947
ENSMUSG00000028222.2	Calb1	4846	0.211628	0.041039	42.2314	109.419	-2.65691	0.327797	7.70393	0.000737799	9.07759	4.22585e-05	10.3608	0.00019921	11.7345	4.73157e-08	1.37366	0.71077
ENSMUSG00000028238.6	Atp6v0d2	2716	8.91844	10.6099	1.92384	13.4422	0.251017	0.823919	-2.22171	0.00829399	0.592877	0.526134	-2.47273	0.035064	0.341859	0.756654	2.81459	0.000693912
ENSMUSG00000028248.15	Pnisr	10187	15.6481	8.26784	7.92106	6.13285	-0.920716	0.000160022	-0.98342	4.53979e-05	-1.35206	6.94776e-09	-0.0627045	0.931195	-0.43134	0.104887	-0.368636	0.235399
ENSMUSG00000028246.13	Faxc	8362	2.7673	0.843287	1.76352	1.27723	-1.72089	0.000612835	-0.650392	0.244119	-1.11773	0.0276791	1.0705	0.21901	0.603163	0.297403	-0.467338	0.518563
ENSMUSG00000045751.16	Mms22l	6382	0.617431	2.96397	4.11656	3.96031	2.27804	5.65025e-19	2.75565	1.26149e-27	2.69782	9.80873e-27	0.477609	0.299321	0.419781	0.121039	-0.0578283	0.90226
ENSMUSG00000028259.13	Fhl5	1171	0.82954	1.01705	1.81977	0.313715	0.304346	0.766544	1.17306	0.157681	-1.53379	0.062315	0.868714	0.587121	-1.83814	0.0236164	-2.70686	0.000537672
ENSMUSG00000040359.14	Ufl1	5706	21.7715	7.67788	7.12556	5.82702	-1.50475	4.23653e-18	-1.61297	1.01383e-20	-1.90372	1.051e-28	-0.108221	0.82254	-0.398967	0.0399958	-0.290745	0.209279
ENSMUSG00000028289.12	Epha7	9884	0.305668	1.55835	2.011	1.28734	2.3665	0.0155008	2.73604	0.003967	2.09041	0.0285177	0.369535	0.888385	-0.276097	0.830887	-0.645632	0.657732
ENSMUSG00000040270.16	Bach2	9940	1.94477	1.08423	0.824419	1.00941	-0.845359	0.177331	-1.24575	0.0331726	-0.948663	0.103665	-0.400389	0.774154	-0.103304	0.899919	0.297085	0.750348
ENSMUSG00000028282.12	Casp8ap2	6826	3.55621	7.01307	8.34307	8.92385	0.981016	2.14185e-06	1.23315	1.15808e-09	1.32935	3.11516e-11	0.252137	0.571623	0.348333	0.125606	0.0961969	0.78956
ENSMUSG00000028278.14	Rragd	5173	10.7825	1.24285	1.01596	1.28419	-3.12545	5.51271e-09	-3.42308	1.21474e-10	-3.07689	5.98624e-09	-0.297634	0.842	0.0485503	0.954927	0.346184	0.703846
ENSMUSG00000054659.13	Pm20d2	1834	4.82376	1.30837	0.984672	0.643427	-1.89958	9.30031e-05	-2.33399	1.13537e-06	-2.95426	4.54614e-10	-0.434412	0.713676	-1.05468	0.0497754	-0.620266	0.372749
ENSMUSG00000073910.10	Mob3b	6200	4.1883	4.90942	9.21455	15.1084	0.229664	0.74326	1.13935	0.0404572	1.85264	0.000350666	0.909686	0.372857	1.62297	0.00193235	0.713288	0.301937
ENSMUSG00000028300.14	C9orf72	4603	3.43311	7.53388	8.43826	8.28116	1.13636	2.87084e-05	1.30119	1.13669e-06	1.27305	1.48948e-06	0.164829	0.813637	0.136689	0.700653	-0.0281406	0.959521
ENSMUSG00000045083.14	Lingo2	8297	0.0200742	0.0259255	0.273908	1.59964	0.485857	0.794531	4.18039	0.00171482	6.74663	9.32566e-08	3.69453	0.0346442	6.26077	3.32407e-08	2.56624	0.0478
ENSMUSG00000040296.15	Ddx58	7050	5.70826	12.3702	20.6147	23.355	1.11672	4.91793e-07	1.85409	5.65077e-18	2.03377	1.20157e-21	0.737374	0.0156064	0.917051	2.02986e-05	0.179677	0.597725
ENSMUSG00000028407.4	Smim27	1150	2.78089	1.56858	1.41303	1.23962	-0.842157	0.0123955	-0.999176	0.00240776	-1.20198	0.000163667	-0.157019	0.861095	-0.359822	0.357481	-0.202803	0.710387
ENSMUSG00000028410.13	Dnaja1	8629	12.2516	15.2096	18.763	24.7324	0.312171	0.0705951	0.615279	9.19741e-05	1.014	1.67516e-11	0.303108	0.304275	0.701826	2.60995e-06	0.398719	0.0206582
ENSMUSG00000028413.13	B4galt1	4234	22.9096	84.6505	67.3692	65.5613	1.8861	9.49311e-14	1.5566	1.02973e-09	1.51736	2.08077e-09	-0.329501	0.55938	-0.368741	0.217642	-0.0392392	0.942132
ENSMUSG00000028435.8	Aqp3	1829	0.625379	7.97504	16.6726	93.4027	3.72689	0.00912252	4.79332	0.00050124	7.28086	3.33239e-08	1.06644	0.748821	3.55397	0.0103347	2.48754	0.126423
ENSMUSG00000028438.16	Kif24	8014	0.376237	0.953882	1.54773	1.4646	1.35509	1.64075e-06	2.05948	3.642e-14	1.97724	2.62542e-13	0.70439	0.079761	0.622154	0.0214048	-0.0822366	0.865058
ENSMUSG00000046312.4	Myorg	4701	3.78447	1.7571	2.05078	1.22493	-1.11162	0.00497129	-0.885372	0.0275382	-1.6333	1.25409e-05	0.226251	0.822205	-0.521677	0.236826	-0.747928	0.100336
ENSMUSG00000073889.10	Il11ra1	4471	10.3637	8.08999	4.6544	2.40113	-0.357846	0.502207	-1.15784	0.00923915	-2.11346	4.11753e-07	-0.799993	0.331886	-1.75561	2.3883e-05	-0.955621	0.0524785
ENSMUSG00000036078.16	Sigmar1	3136	7.42194	14.5671	15.2742	14.8447	0.973172	5.35554e-09	1.04255	2.83573e-10	1.00025	1.11169e-09	0.0693773	0.884509	0.0270798	0.913926	-0.0422975	0.895227
ENSMUSG00000073888.13	Ccl27a	2377	1.64239	0.885667	0.735019	0.561257	-0.910051	0.00138692	-1.20432	1.77639e-05	-1.58218	1.07828e-08	-0.294266	0.657714	-0.672131	0.0299946	-0.377865	0.352795
ENSMUSG00000036062.13	Phf24	7118	1.01832	0.156009	0.118945	0.361779	-2.75284	1.05236e-05	-3.17918	3.19899e-07	-1.50873	0.0166733	-0.426345	0.800763	1.24411	0.0690606	1.67045	0.0175278
ENSMUSG00000028459.11	Cd72	3422	0.741543	4.30711	3.44171	1.2011	2.5586	1.32454e-08	2.23067	8.54281e-07	0.708119	0.155089	-0.327932	0.768559	-1.85048	1.62476e-05	-1.52255	0.000862055
ENSMUSG00000028463.14	Car9	2304	0.353443	9.53852	29.5905	33.4474	4.83639	2.22879e-06	6.47196	8.83551e-11	6.64862	1.82086e-11	1.63557	0.415244	1.81223	0.0975997	0.176658	0.931014
ENSMUSG00000028464.16	Tpm2	2909	282.793	71.6566	66.3435	45.4237	-1.98083	0.000168889	-2.092	5.93651e-05	-2.63875	1.86722e-07	-0.111169	0.944447	-0.657918	0.278591	-0.54675	0.465331
ENSMUSG00000078716.10	Tmem8b	5603	2.73988	0.831849	0.83258	0.85257	-1.72796	2.3888e-09	-1.72443	2.14536e-09	-1.69004	2.90508e-09	0.00353467	0.998563	0.0379169	0.935178	0.0343823	0.956747
ENSMUSG00000028476.13	Reck	4779	5.89232	3.48928	1.95551	3.30666	-0.757414	0.263812	-1.59753	0.00820154	-0.834902	0.183525	-0.84012	0.491375	-0.0774879	0.930831	0.762632	0.331536
ENSMUSG00000028480.14	Glipr2	2320	5.17753	20.7535	14.4644	8.24319	2.00706	3.56978e-05	1.48548	0.00281495	0.673573	0.200423	-0.521581	0.629087	-1.33349	0.00690185	-0.811911	0.175761
ENSMUSG00000028479.18	Gne	6358	7.84647	18.3002	18.036	9.25318	1.22249	0.049643	1.20142	0.0504826	0.238332	0.733041	-0.0210707	0.992944	-0.984158	0.120846	-0.963088	0.176644
ENSMUSG00000035683.13	Melk	2972	1.24057	5.50617	8.37523	8.37521	2.16385	6.45299e-08	2.77217	1.5556e-12	2.77089	1.12007e-12	0.608328	0.442898	0.60704	0.168297	-0.00128806	1
ENSMUSG00000048232.12	Fbxo10	4691	4.2148	5.53128	4.87904	2.32616	0.392303	0.32693	0.212315	0.613933	-0.858983	0.0131875	-0.179987	0.842136	-1.25129	0.000156362	-1.0713	0.0023584
ENSMUSG00000035615.12	Frmpd1	5324	0.107265	0.823113	0.743728	1.86462	3.03494	1.80855e-06	2.89113	5.40596e-06	4.22139	5.44681e-12	-0.143814	0.932816	1.18645	0.0490355	1.33026	0.0367753
ENSMUSG00000035561.5	Aldh1b1	2298	1.54054	2.06684	1.11293	0.743987	0.428222	0.443557	-0.486421	0.367439	-1.06404	0.0266452	-0.914643	0.276053	-1.49227	0.0011245	-0.577623	0.363441
ENSMUSG00000028328.13	Tmod1	3946	1.67256	0.20304	0.162784	2.45633	-3.10914	1.8794e-05	-3.47099	1.62815e-06	0.557847	0.49066	-0.361852	0.861955	3.66699	9.25878e-08	4.02884	6.33045e-09
ENSMUSG00000028330.8	Ncbp1	3386	10.5322	15.0686	19.8113	25.2361	0.517298	0.0290081	0.913376	3.31693e-05	1.26157	3.04819e-09	0.396078	0.353647	0.744267	0.000617247	0.348189	0.207422
ENSMUSG00000028337.14	Coro2a	6459	267.407	18.6733	16.3854	12.9874	-3.84037	1.01728e-34	-4.02902	3.84266e-38	-4.36455	7.16113e-45	-0.188649	0.830961	-0.524175	0.159465	-0.335526	0.485093
ENSMUSG00000039813.14	Tbc1d2	5425	5.77264	3.75364	3.88029	7.67776	-0.621795	0.0570073	-0.57311	0.077318	0.41142	0.203499	0.0486849	0.958668	1.03322	0.000475425	0.98453	0.00141317
ENSMUSG00000066191.12	Anks6	5358	0.93665	1.51651	1.13325	0.583513	0.698707	0.0987465	0.27461	0.558494	-0.695892	0.0880624	-0.424097	0.606278	-1.3946	0.000181608	-0.970502	0.0211603
ENSMUSG00000039774.12	Galnt12	2288	0.571077	5.39588	5.71861	8.7972	3.28248	4.84406e-07	3.36734	2.04961e-07	3.98913	3.43483e-10	0.0848659	0.965306	0.706657	0.346086	0.621791	0.498469
ENSMUSG00000028339.17	Col15a1	6349	21.0185	111.267	65.2369	10.0263	2.4047	2.52845e-16	1.63432	4.64464e-08	-1.06815	0.000462888	-0.770381	0.115173	-3.47285	3.97239e-38	-2.70247	5.8385e-23
ENSMUSG00000007613.15	Tgfbr1	6534	13.3022	28.8905	21.858	19.4635	1.11937	0.00385416	0.716642	0.0764054	0.549471	0.172176	-0.402732	0.630159	-0.569904	0.175878	-0.167172	0.800502
ENSMUSG00000039740.6	Alg2	3450	20.4464	10.2872	10.9514	9.94703	-0.992285	5.24033e-10	-0.899133	1.84077e-08	-1.04032	3.69263e-11	0.093152	0.832198	-0.048036	0.836184	-0.141188	0.568865
ENSMUSG00000053317.11	Sec61b	1271	85.3018	45.365	48.6754	35.586	-0.911625	1.85206e-06	-0.809115	2.4987e-05	-1.26268	9.19267e-12	0.10251	0.844028	-0.351056	0.0976147	-0.453567	0.037858
ENSMUSG00000028341.9	Nr4a3	5987	40.3469	2.15561	1.52152	1.82886	-4.23109	1.57668e-12	-4.73654	1.51635e-15	-4.46835	4.16572e-14	-0.505451	0.73934	-0.237262	0.78168	0.268189	0.809848
ENSMUSG00000028343.10	Erp44	3418	50.6231	23.8815	24.5777	22.8144	-1.08445	9.52836e-12	-1.04261	5.20369e-11	-1.15071	2.2609e-13	0.0418408	0.932573	-0.0662545	0.769166	-0.108095	0.685062
ENSMUSG00000028344.12	Invs	11431	2.52455	1.46531	1.49961	1.07361	-0.786352	0.0159151	-0.753578	0.0199333	-1.23445	4.85235e-05	0.0327746	0.973926	-0.448099	0.202362	-0.480874	0.222413
ENSMUSG00000039693.11	Msantd3	1973	2.95813	7.29689	7.60184	9.44496	1.306	4.37705e-09	1.36949	5.45842e-10	1.68016	7.35802e-15	0.063493	0.918154	0.37416	0.107774	0.310667	0.256597
ENSMUSG00000028347.14	Tmeff1	2549	2.16136	10.2602	11.8465	7.97972	2.25693	2.0947e-07	2.46461	1.00142e-08	1.8943	1.21055e-05	0.20768	0.861095	-0.362628	0.502532	-0.570309	0.326287
ENSMUSG00000039611.2	Tmem246	3325	2.39608	1.02136	0.459955	1.22303	-1.24033	0.0990845	-2.42408	0.00045361	-0.97678	0.18009	-1.18376	0.384077	0.263549	0.777503	1.4473	0.0698365
ENSMUSG00000028312.19	Smc2	5478	2.32282	9.28457	13.1306	13.929	2.00212	9.54792e-11	2.50338	1.93636e-16	2.58805	1.14028e-17	0.501263	0.424952	0.585934	0.0855432	0.0846711	0.887833
ENSMUSG00000015247.10	Nipsnap3b	1687	7.4416	12.4826	12.5977	15.0217	0.750144	9.50202e-05	0.76532	6.03767e-05	1.01642	3.32759e-08	0.0151763	0.980421	0.266281	0.201321	0.251105	0.302476
ENSMUSG00000028412.17	Slc44a1	6945	12.4365	26.0144	21.0825	31.8818	1.06522	1.01665e-07	0.762006	0.000198571	1.35849	3.23317e-12	-0.303215	0.467885	0.293271	0.202985	0.596486	0.00566888
ENSMUSG00000028414.17	Fktn	8426	5.55749	3.11999	3.1946	2.69963	-0.834502	4.00376e-12	-0.800326	2.52177e-11	-1.04138	1.15435e-18	0.0341764	0.925608	-0.206882	0.138046	-0.241058	0.106559
ENSMUSG00000003032.8	Klf4	3049	4.99633	11.3969	11.8888	25.6366	1.19209	0.0583	1.25311	0.0417911	2.36266	3.0988e-05	0.0610133	0.973926	1.17057	0.0580322	1.10955	0.105915
ENSMUSG00000038816.14	Ctnnal1	7661	8.32601	2.86666	2.61321	2.10962	-1.54015	2.91619e-05	-1.6755	4.30743e-06	-1.98266	2.76331e-08	-0.135352	0.897643	-0.442505	0.308391	-0.307153	0.585566
ENSMUSG00000028434.12	Epb41l4b	8858	8.36146	5.24335	2.93343	2.83358	-0.673591	0.175412	-1.51409	0.000623415	-1.56296	0.000317884	-0.840496	0.310307	-0.889372	0.05833	-0.0488758	0.957618
ENSMUSG00000038764.14	Ptpn3	7238	15.5166	8.26534	6.98638	9.15193	-0.909002	0.0206579	-1.15228	0.00227301	-0.762279	0.0472836	-0.243278	0.798767	0.146723	0.772139	0.390002	0.46142
ENSMUSG00000052117.5	D630039A03Rik	2830	10.998	5.422	3.48966	2.38687	-1.02212	0.174527	-1.66203	0.0165714	-2.21011	0.00083855	-0.639909	0.677779	-1.18799	0.102902	-0.548083	0.58797
ENSMUSG00000028367.5	Txn1	1051	73.186	126.581	150.467	216.023	0.790732	0.0026607	1.0405	4.30166e-05	1.562	1.85745e-10	0.24977	0.671517	0.77127	0.0026322	0.5215	0.0795669
ENSMUSG00000028369.15	Svep1	16117	4.22469	20.983	11.548	4.83265	2.31304	0.000539327	1.45119	0.0380205	0.19415	0.812607	-0.861853	0.538612	-2.11889	0.00124975	-1.25704	0.109925
ENSMUSG00000038668.14	Lpar1	4289	8.15452	16.162	10.3525	3.95821	0.987727	0.10787	0.344546	0.616701	-1.044	0.0720473	-0.643182	0.595117	-2.03173	0.000175215	-1.38855	0.0230571
ENSMUSG00000038630.8	Zkscan16	2794	8.81338	0.23113	0.117033	0.0321242	-5.34656	4.42461e-44	-6.48511	4.5579e-50	-9.10073	2.12542e-34	-1.13855	0.22448	-3.75417	7.27956e-06	-2.61562	0.00677549
ENSMUSG00000028378.6	Ptgr1	2296	31.2913	17.0127	14.4589	18.8511	-0.879812	0.0174484	-1.11578	0.00172624	-0.732226	0.0435141	-0.235965	0.793336	0.147585	0.756654	0.38355	0.438099
ENSMUSG00000070972.13	Dnajc25	4542	5.17016	5.94558	5.33891	2.84073	0.200765	0.3259	0.0456325	0.846375	-0.865128	3.46031e-07	-0.155132	0.699044	-1.06589	1.89341e-11	-0.91076	2.72398e-08
ENSMUSG00000092345.1	Gm20503	1294	6.82583	15.8972	13.1542	8.04394	1.2172	4.96441e-22	0.941989	2.19995e-13	0.233107	0.105948	-0.27521	0.157935	-0.984092	6.49166e-20	-0.708882	4.26611e-10
ENSMUSG00000038607.12	Gng10	1314	4.82174	13.5329	10.7058	6.76038	1.48839	7.25007e-28	1.14518	1.41975e-16	0.484919	0.000992838	-0.343205	0.0632056	-1.00347	3.755e-19	-0.660264	4.35075e-08
ENSMUSG00000028381.8	Ugcg	5212	8.80664	40.3421	28.6603	19.9794	2.19684	1.903e-21	1.70305	2.96782e-13	1.18294	5.4359e-07	-0.493782	0.25802	-1.01389	1.24786e-05	-0.520112	0.0616125
ENSMUSG00000038578.15	Susd1	4766	5.57142	2.63593	1.79488	2.91903	-1.0828	6.14351e-05	-1.6441	3.91354e-10	-0.936421	0.000454774	-0.561298	0.256302	0.146378	0.682415	0.707675	0.0177952
ENSMUSG00000038544.14	Inip	5995	2.64351	3.6533	4.68871	5.35053	0.469318	0.0528652	0.830906	0.000200625	1.02013	2.44435e-06	0.361588	0.406837	0.550808	0.0147213	0.18922	0.561744
ENSMUSG00000028385.14	Snx30	7795	2.27336	4.74446	3.51916	3.42652	1.06346	0.000104159	0.629838	0.0291245	0.593303	0.0356823	-0.433618	0.420339	-0.470153	0.113004	-0.0365355	0.94922
ENSMUSG00000028389.12	Zfp37	4086	2.42695	3.02634	2.4522	1.20249	0.319857	0.588679	0.0126161	0.986667	-1.01772	0.034528	-0.307241	0.795762	-1.33758	0.00450107	-1.03034	0.0519588
ENSMUSG00000066152.11	Slc31a2	2033	49.4903	12.0481	9.72578	9.87072	-2.04019	2.36195e-12	-2.35268	3.33214e-16	-2.32866	4.50747e-16	-0.312492	0.652316	-0.288475	0.435147	0.0240171	0.971081
ENSMUSG00000063851.12	Rnf183	1524	0.346959	2.23906	1.69899	3.75392	2.78855	1.20541e-05	2.38649	0.000214441	3.53897	8.55381e-09	-0.402052	0.777634	0.750423	0.240753	1.15248	0.0773928
ENSMUSG00000028391.16	Wdr31	4738	1.18635	0.647541	0.791748	0.521293	-0.882333	0.13851	-0.591756	0.332705	-1.19713	0.0286366	0.290577	0.838407	-0.314799	0.651551	-0.605376	0.41421
ENSMUSG00000059810.18	Rgs3	10801	1.89035	3.80246	3.34	3.7166	1.00989	0.000272634	0.821624	0.00351006	0.977193	0.000329379	-0.188268	0.78646	-0.0326981	0.938136	0.155569	0.731268
ENSMUSG00000045672.15	Col27a1	13022	1.94619	5.62025	4.53382	1.2472	1.53146	0.00750826	1.22153	0.0360605	-0.643184	0.286792	-0.309937	0.831686	-2.17465	4.33385e-05	-1.86471	0.000913813
ENSMUSG00000028359.4	Orm3	773	1.18401	3.16956	1.64356	0.151837	1.46486	0.525947	0.493738	0.844343	-3.56342	0.0777536	-0.971124	0.844028	-5.02829	0.0111103	-4.05716	0.0697455
ENSMUSG00000039158.11	Akna	5765	1.67806	6.38067	4.27987	6.7784	1.93171	0.000185632	1.35388	0.0110661	2.01911	6.18932e-05	-0.577831	0.604357	0.0874056	0.908548	0.665237	0.330184
ENSMUSG00000039137.18	Whrn	7337	1.44564	0.742721	0.996685	0.650346	-0.967244	0.0124886	-0.5357	0.190938	-1.15704	0.0016859	0.431544	0.593122	-0.189799	0.699552	-0.621343	0.173042
ENSMUSG00000039105.6	Atp6v1g1	1135	35.6484	50.819	51.6642	71.9403	0.511979	0.00676689	0.536466	0.00394015	1.01341	6.09729e-09	0.0244875	0.964849	0.501435	0.00596791	0.476947	0.014401
ENSMUSG00000045917.17	Tmem268	3974	1.4356	3.67451	2.67887	3.54162	1.36259	0.000139329	0.902899	0.0152553	1.3103	0.00018938	-0.459688	0.533025	-0.052291	0.920473	0.407397	0.396551
ENSMUSG00000028362.2	Tnfsf8	3807	0.0822533	1.42565	1.53484	0.465902	4.33278	5.22909e-15	4.44337	7.81589e-16	2.69958	2.0939e-06	0.110593	0.920387	-1.6332	1.71029e-05	-1.74379	5.46815e-06
ENSMUSG00000028364.15	Tnc	7772	3.02217	236.654	256.545	55.9105	6.29415	3.9861e-24	6.41059	4.47774e-25	4.21246	1.89561e-11	0.116439	0.954536	-2.08169	0.00144776	-2.19813	0.00106595
ENSMUSG00000028370.7	Pappa	11027	0.844464	1.77372	3.89403	1.4713	1.07469	0.130952	2.21072	0.000555758	0.804029	0.244985	1.13603	0.355327	-0.270664	0.752689	-1.40669	0.0509001
ENSMUSG00000028373.16	Astn2	4959	0.583797	0.225626	0.159849	1.43083	-1.4107	0.0711402	-1.92089	0.0101834	1.30695	0.0746868	-0.510185	0.784152	2.71766	7.69488e-05	3.22784	3.30598e-06
ENSMUSG00000039005.13	Tlr4	5556	2.70408	9.24904	7.01118	10.0345	1.77732	5.74947e-09	1.37604	8.95009e-06	1.89469	2.78589e-10	-0.40128	0.542613	0.117368	0.781686	0.518648	0.175334
ENSMUSG00000028351.5	Brinp1	6181	0.159066	4.52683	2.43487	0.606074	4.89271	9.62432e-13	3.99628	7.51955e-09	1.97899	0.00621199	-0.896428	0.530094	-2.91372	7.03862e-06	-2.01729	0.00487958
ENSMUSG00000039270.9	Megf9	8226	2.80423	4.71826	5.03197	6.93281	0.751704	6.50898e-05	0.845123	5.12372e-06	1.30684	2.44806e-13	0.0934184	0.852128	0.555138	0.00264865	0.46172	0.0224898
ENSMUSG00000043003.14	Rasef	5746	20.8069	7.04423	5.83306	5.09932	-1.5634	0.000303957	-1.83647	1.50706e-05	-2.03043	1.07181e-06	-0.273073	0.805042	-0.467027	0.361015	-0.193954	0.798165
ENSMUSG00000048706.3	Lurap1l	3066	24.0306	6.85386	6.51181	6.77061	-1.81133	7.64382e-09	-1.88532	1.43746e-09	-1.82987	3.23094e-09	-0.0739875	0.939106	-0.0185405	0.972078	0.055447	0.932939
ENSMUSG00000028403.15	Zdhhc21	12972	2.81171	4.20392	4.32552	10.5459	0.580798	0.253227	0.622124	0.206312	1.90821	8.08312e-06	0.0413264	0.977314	1.32741	0.00254682	1.28608	0.00553661
ENSMUSG00000059049.14	Frem1	13978	2.97289	1.4102	0.274432	0.477997	-1.07786	0.223467	-3.45181	6.22769e-06	-2.64406	0.000561843	-2.37395	0.0324858	-1.5662	0.0583897	0.807751	0.467892
ENSMUSG00000038172.14	Ttc39b	10199	3.84492	9.15676	10.2473	10.8425	1.25263	4.47768e-06	1.41568	1.47352e-07	1.49665	1.7725e-08	0.163044	0.821076	0.244021	0.469848	0.0809768	0.875503
ENSMUSG00000052407.17	Ccdc171	5999	1.93968	0.850809	1.03677	0.827578	-1.1942	1.34231e-06	-0.917464	0.000231763	-1.2398	2.83112e-07	0.276736	0.623549	-0.0455986	0.904251	-0.322334	0.342976
ENSMUSG00000028487.18	Bnc2	8174	3.60658	8.18706	7.28525	0.866815	1.18377	0.0458351	1.01544	0.0879195	-2.063	0.000149263	-0.168333	0.914305	-3.24678	1.67255e-10	-3.07844	2.46853e-09
ENSMUSG00000038070.15	Cntln	7102	1.57707	4.28521	4.17895	3.13915	1.44454	6.3599e-09	1.41041	1.30218e-08	0.995828	7.42426e-05	-0.0341301	0.964699	-0.448708	0.0985755	-0.414578	0.178881
ENSMUSG00000028488.15	Sh3gl2	6551	2.95277	0.735092	0.631953	0.427452	-2.01519	0.000487011	-2.23745	8.45552e-05	-2.80369	4.30762e-07	-0.222266	0.893085	-0.7885	0.232573	-0.566234	0.499864
ENSMUSG00000066113.16	Adamtsl1	12767	4.7258	4.00923	3.00097	0.475381	-0.237345	0.822062	-0.656275	0.470358	-3.32218	8.02698e-06	-0.41893	0.837363	-3.08484	2.8283e-05	-2.66591	0.000601734
ENSMUSG00000038047.18	Haus6	6459	2.20661	4.12757	5.29	5.21413	0.905176	0.000950494	1.26543	1.6087e-06	1.24359	1.85438e-06	0.360249	0.518378	0.338417	0.267083	-0.0218323	0.969292
ENSMUSG00000028494.12	Plin2	3512	2.76252	22.4246	22.4492	52.7097	3.02739	1.84001e-38	3.02919	1.6479e-38	4.26075	1.39282e-76	0.00180584	0.999526	1.23337	3.2304e-08	1.23156	4.84798e-08
ENSMUSG00000038007.14	Acer2	7159	35.0326	2.84942	2.69188	15.6761	-3.62225	1.0575e-41	-3.70376	1.30859e-43	-1.16043	3.0204e-05	-0.0815126	0.923106	2.46182	3.6006e-22	2.54333	2.28013e-23
ENSMUSG00000028496.17	Mllt3	12004	2.55231	4.78415	8.2622	11.6694	0.907439	0.0613089	1.69638	0.000137085	2.19452	3.51933e-07	0.78894	0.360404	1.28709	0.00420674	0.498145	0.422181
ENSMUSG00000028497.12	Hacd4	6756	5.37578	6.90687	4.44196	3.37103	0.362165	0.335525	-0.276895	0.465313	-0.675026	0.0404225	-0.639059	0.270476	-1.03719	0.00101416	-0.398131	0.356356
ENSMUSG00000045364.2	Ifne	664	0.0931683	0.525553	3.81517	8.25832	3.78793	0.0446141	6.82237	7.34368e-05	7.94643	2.15566e-06	3.03444	0.102827	4.1585	0.000326105	1.12406	0.496026
ENSMUSG00000062937.7	Mtap	3226	6.35863	15.1521	22.0723	24.8033	1.25454	0.000695623	1.79819	4.5107e-07	1.966	2.07256e-08	0.543649	0.460077	0.711458	0.0673693	0.167809	0.791257
ENSMUSG00000044303.6	Cdkn2a	1172	0.480636	39.34	56.4563	49.3087	6.48498	2.03233e-14	7.00671	9.04018e-17	6.81116	4.70817e-16	0.52173	0.8068	0.326184	0.772552	-0.195546	0.902055
ENSMUSG00000073802.5	Cdkn2b	1390	1.3522	17.1576	15.435	16.8375	3.69941	1.56238e-19	3.54675	4.67749e-18	3.67112	1.81913e-19	-0.152664	0.894182	-0.0282911	0.964049	0.124373	0.867847
ENSMUSG00000054000.5	Tusc1	1374	1.41267	3.06501	3.0645	2.87579	1.13852	0.000777623	1.14778	0.000639489	1.0479	0.00161765	0.00926478	0.994352	-0.0906112	0.83115	-0.099876	0.860169
ENSMUSG00000028578.8	Caap1	3591	2.32866	2.53676	2.97166	4.84306	0.124233	0.802964	0.355428	0.40177	1.05897	0.00340378	0.231195	0.801951	0.934736	0.0105749	0.703541	0.0933368
ENSMUSG00000006386.15	Tek	4712	2.27481	4.93118	3.78242	15.7678	1.11947	0.0864993	0.735595	0.277984	2.79824	1.1388e-06	-0.383873	0.800729	1.67877	0.00503873	2.06264	0.000587324
ENSMUSG00000052684.4	Jun	3189	14.7338	55.1937	58.0987	69.5628	1.90644	6.25307e-21	1.98072	1.29542e-22	2.24027	6.26982e-29	0.0742841	0.902789	0.333831	0.158208	0.259547	0.36897
ENSMUSG00000028572.13	Hook1	8318	9.90101	4.0815	5.61526	6.80874	-1.27939	3.37268e-06	-0.817966	0.00410446	-0.540771	0.0621368	0.46142	0.404274	0.738616	0.00968119	0.277196	0.491236
ENSMUSG00000028571.15	Cyp2j13	4690	11.3097	0.0113637	0.0113242	0.0110515	-12.0519	5.53983e-29	-12.0732	3.80748e-29	-12.2494	3.41722e-30	-0.0213111	0.99851	-0.19756	0.94185	-0.176249	0.961202
ENSMUSG00000015224.10	Cyp2j9	3337	1.27463	0.646465	0.489781	0.563761	-0.989378	0.00124089	-1.41323	2.83956e-06	-1.20675	4.22919e-05	-0.423856	0.522759	-0.217371	0.580313	0.206484	0.684083
ENSMUSG00000028565.18	Nfia	10891	23.1601	14.4222	14.0065	11.1391	-0.683492	0.00630582	-0.725652	0.00318341	-1.05605	6.81134e-06	-0.0421606	0.954827	-0.372556	0.167629	-0.330395	0.299722
ENSMUSG00000035407.8	Kank4	4795	4.60535	2.38956	0.759553	1.36631	-0.949556	0.216733	-2.61519	0.000101433	-1.75935	0.00982696	-1.66563	0.126946	-0.809799	0.302428	0.855836	0.349786
ENSMUSG00000028560.11	Usp1	3733	10.413	18.1815	20.593	21.4757	0.804598	0.0213002	0.985081	0.00344363	1.04528	0.00147618	0.180482	0.837363	0.240683	0.564551	0.060201	0.927024
ENSMUSG00000073791.12	Efcab7	2259	0.456614	0.782774	1.12635	1.00576	0.807454	0.0672416	1.3536	0.000756386	1.18201	0.00307291	0.546144	0.443316	0.374557	0.375575	-0.171587	0.773707
ENSMUSG00000025791.18	Pgm1	2921	7.07314	15.0255	22.0543	26.1581	1.08838	0.025428	1.64311	0.000349239	1.88899	2.42383e-05	0.554732	0.573913	0.800608	0.109069	0.245876	0.748386
ENSMUSG00000035305.5	Ror1	5762	2.35869	8.27439	4.55145	1.46381	1.81392	0.000355009	0.95007	0.0801857	-0.690068	0.205375	-0.86385	0.376642	-2.50399	1.1123e-07	-1.64014	0.00155594
ENSMUSG00000028532.14	Cachd1	6020	9.72567	4.78336	3.78714	2.83933	-1.02488	0.0727741	-1.36282	0.0119019	-1.77838	0.000604845	-0.33794	0.8017	-0.753501	0.203201	-0.415561	0.604073
ENSMUSG00000035275.14	Raver2	6342	2.28844	1.13502	0.649056	1.34789	-1.01633	0.162972	-1.83012	0.0059203	-0.76616	0.276536	-0.813791	0.558524	0.250169	0.776662	1.06396	0.186518
ENSMUSG00000028527.18	Ak4	4646	0.69236	5.94226	9.22874	12.267	3.11877	2.12705e-05	3.75525	1.81655e-07	4.16586	4.05439e-09	0.636483	0.71311	1.04709	0.203313	0.410608	0.73525
ENSMUSG00000035212.14	Leprot	1898	17.7565	37.0114	34.6701	40.8202	1.06088	6.51487e-11	0.9677	2.68001e-09	1.20191	4.89e-14	-0.0931839	0.831542	0.14103	0.489118	0.234214	0.275967
ENSMUSG00000057722.17	Lepr	7049	1.47714	1.13377	0.681929	5.91838	-0.384169	0.539915	-1.1249	0.0340998	2.00701	3.74081e-05	-0.740731	0.474212	2.39118	3.15489e-07	3.13191	9.33739e-12
ENSMUSG00000028525.16	Pde4b	10560	1.49155	12.2252	15.3791	18.3077	3.03838	1.89463e-17	3.36991	2.30438e-21	3.62122	9.96581e-25	0.33153	0.704541	0.582841	0.159667	0.251311	0.671513
ENSMUSG00000035126.19	Wdr78	7307	0.602616	0.527853	0.798714	1.21144	-0.193304	0.71753	0.411453	0.376931	1.01554	0.0118462	0.604758	0.447947	1.20884	0.00211552	0.604082	0.220988
ENSMUSG00000028521.17	Slc35d1	8528	1.2208	2.21787	2.61563	3.28347	0.8647	0.000315117	1.10486	2.1589e-06	1.43134	2.72032e-10	0.240164	0.644792	0.566636	0.0171931	0.326472	0.275068
ENSMUSG00000078612.9	Fyb2	3136	23.6653	4.53477	4.2789	1.09489	-2.38694	9.6443e-05	-2.47234	4.66098e-05	-4.44985	2.69386e-14	-0.0853999	0.964528	-2.06291	0.000740052	-1.97751	0.00196645
ENSMUSG00000028518.8	Prkaa2	7969	3.72987	1.04569	1.27796	1.38775	-1.83951	0.00229963	-1.55036	0.0108949	-1.42938	0.0171387	0.289149	0.856963	0.410122	0.586911	0.120973	0.917099
ENSMUSG00000028517.8	Plpp3	3159	43.5468	25.8265	15.3009	16.4293	-0.754058	0.242373	-1.50991	0.0089607	-1.40695	0.0134104	-0.755856	0.520793	-0.652888	0.319602	0.102968	0.926821
ENSMUSG00000044254.6	Pcsk9	3521	0.283351	0.508836	1.04245	0.623799	0.872199	0.438885	1.93038	0.0492849	1.17573	0.241142	1.05818	0.592193	0.303533	0.80956	-0.754649	0.57824
ENSMUSG00000025418.7	Bsnd	2756	1.26535	0.0228428	0.0156568	0.0194637	-7.38803	3.46106e-10	-8.84958	4.44319e-14	-8.30448	1.16921e-12	-1.46154	0.733771	-0.916443	0.697359	0.545098	0.870494
ENSMUSG00000034926.3	Dhcr24	4028	3.5374	17.2653	25.9084	42.3087	2.29077	4.07206e-06	2.87685	3.41811e-09	3.5843	6.48386e-14	0.586081	0.592303	1.29354	0.0117755	0.707456	0.27866
ENSMUSG00000034919.2	Ttc22	3318	0.372456	2.07505	0.917409	2.21314	2.52137	0.00223547	1.33033	0.133248	2.61295	0.00109636	-1.19104	0.451894	0.0915847	0.939605	1.28262	0.188348
ENSMUSG00000034853.16	Acot11	6056	5.34821	4.20619	2.62756	2.47515	-0.3464	0.237518	-1.03059	4.98777e-05	-1.11319	7.70658e-06	-0.684192	0.0824982	-0.766794	0.00280917	-0.0826027	0.864313
ENSMUSG00000070877.4	Ldlrad1	1093	0.261205	0.197196	0.183731	1.18107	-0.491569	0.738577	-0.683921	0.620567	2.35804	0.0274579	-0.192352	0.955435	2.84961	0.00619136	3.04197	0.00547911
ENSMUSG00000028617.10	Lrrc42	2139	5.35891	11.2108	11.8291	10.3681	1.06785	8.76426e-08	1.14838	6.25587e-09	0.955792	1.36612e-06	0.0805297	0.885992	-0.112062	0.663301	-0.192592	0.497927
ENSMUSG00000028614.14	Ndc1	4924	2.5703	5.62399	7.4022	6.64753	1.13183	0.00178979	1.53014	1.2073e-05	1.37417	7.68339e-05	0.39831	0.602635	0.242342	0.588605	-0.155968	0.800502
ENSMUSG00000034762.9	Glis1	3645	0.630053	1.58612	2.66392	1.09258	1.34926	0.108646	2.10444	0.0069249	0.808967	0.334997	0.755179	0.657714	-0.540293	0.570459	-1.29547	0.156598
ENSMUSG00000028613.15	Lrp8	12689	0.134746	1.087	1.70873	1.73095	3.04656	8.91784e-25	3.70368	1.23265e-36	3.72103	2.94514e-37	0.657123	0.115546	0.674469	0.0122147	0.0173464	0.975655
ENSMUSG00000028597.11	Gpx7	1289	1.86719	15.5323	13.6204	2.59901	3.08003	7.97783e-12	2.8904	1.37583e-10	0.486803	0.353831	-0.189627	0.880772	-2.59322	5.33081e-10	-2.4036	1.69617e-08
ENSMUSG00000028587.18	Orc1	3479	0.184384	1.07545	1.68698	2.17794	2.61182	5.57273e-06	3.27311	5.34617e-09	3.64085	4.2669e-11	0.661284	0.540391	1.02902	0.0571122	0.367741	0.641307
ENSMUSG00000047143.3	Dmrta2	2922	0.130792	0.199809	1.12754	1.39714	0.686852	0.516262	3.28333	6.11505e-05	3.59191	7.28088e-06	2.59648	0.0120959	2.90505	8.37978e-05	0.308573	0.811751
ENSMUSG00000028544.14	Slc5a9	5184	0.684717	1.5066	1.28127	0.370688	1.14751	0.311437	0.910171	0.423883	-0.903554	0.405467	-0.237341	0.933657	-2.05107	0.0451203	-1.81372	0.116506
ENSMUSG00000070867.4	Trabd2b	6617	0.461492	3.16695	2.38149	1.11592	2.79546	1.87529e-06	2.38234	5.67789e-05	1.28594	0.0367601	-0.413121	0.778086	-1.50952	0.0118242	-1.0964	0.116794
ENSMUSG00000055210.4	Foxd2	2592	1.08111	1.61622	1.24349	0.426524	0.585326	0.256895	0.204169	0.724941	-1.3582	0.00342965	-0.381157	0.713467	-1.94353	7.50674e-06	-1.56237	0.000782545
ENSMUSG00000028718.16	Stil	5795	0.340327	2.85259	3.8949	3.34992	3.10099	4.28188e-21	3.55388	1.2126e-27	3.33451	1.31281e-24	0.452886	0.47697	0.233524	0.54836	-0.219362	0.650674
ENSMUSG00000028717.12	Tal1	4379	0.50187	0.893074	0.712801	1.56588	0.842475	0.158615	0.510286	0.414139	1.66039	0.0015807	-0.33219	0.802955	0.817914	0.15095	1.1501	0.0486234
ENSMUSG00000028716.15	Pdzk1ip1	1778	49.743	4.328	2.54646	6.38824	-3.53003	1.45238e-09	-4.30397	8.50524e-14	-2.96724	3.1181e-07	-0.77394	0.550008	0.562792	0.444747	1.33673	0.0528174
ENSMUSG00000066071.6	Cyp4a12a	2422	77.9507	0.13764	0.0178159	0.0214004	-9.34565	1.66593e-07	-14.6267	6.41335e-13	-14.0816	3.49438e-12	-5.28109	0.141374	-4.736	0.0416992	0.545097	0.911351
ENSMUSG00000028713.17	Cyp4b1	2256	1.74221	0.568124	0.473619	23.9475	-1.65074	0.0589923	-1.93236	0.0225272	3.79565	7.54808e-07	-0.281618	0.904129	5.44639	5.00745e-14	5.728	3.41505e-15
ENSMUSG00000028710.18	Atpaf1	4050	5.5191	2.83894	2.83452	2.67837	-0.962298	5.67052e-11	-0.962954	4.4763e-11	-1.04821	3.51215e-13	-0.00065579	1	-0.0859107	0.670435	-0.0852549	0.740639
ENSMUSG00000034171.13	Faah	7834	10.7834	3.13378	4.10877	3.63503	-1.78447	0.00335672	-1.39337	0.0246446	-1.5699	0.00863632	0.391097	0.796508	0.214567	0.792723	-0.17653	0.874058
ENSMUSG00000028702.15	Rad54l	7706	0.464038	1.41065	2.02068	1.75821	1.61407	4.13349e-07	2.13746	6.01904e-12	1.93471	4.40808e-10	0.523388	0.382237	0.320645	0.379751	-0.202742	0.677209
ENSMUSG00000028700.14	Pomgnt1	5463	16.8844	8.73145	11.0492	8.25729	-0.952504	3.09398e-13	-0.610809	4.71982e-06	-1.03246	1.11116e-15	0.341696	0.115117	-0.0799555	0.653808	-0.421651	0.00293959
ENSMUSG00000028701.4	Lurap1	5886	9.7719	2.45985	3.0638	1.89995	-1.99316	1.30909e-13	-1.67441	5.64939e-10	-2.36552	4.99904e-19	0.318747	0.605733	-0.372362	0.254193	-0.691109	0.0277605
ENSMUSG00000028699.9	Tspan1	2329	190.821	104.943	93.7176	70.3409	-0.862704	0.201744	-1.02598	0.111918	-1.43999	0.0171612	-0.163272	0.924244	-0.577289	0.421182	-0.414017	0.659091
ENSMUSG00000111410.1	Gm49337	1535	9.03295	21.1878	22.4622	23.0675	1.23303	0.00250482	1.3173	0.00104551	1.35538	0.000581673	0.0842647	0.943922	0.122345	0.824276	0.0380798	0.963143
ENSMUSG00000028698.13	Pik3r3	5300	7.5491	18.3569	19.4011	19.9307	1.28302	0.00124798	1.36285	0.000513935	1.40159	0.000273308	0.0798259	0.946398	0.118564	0.827715	0.0387384	0.961908
ENSMUSG00000034035.18	Ccdc17	2634	2.61483	1.08329	0.954408	1.76263	-1.28411	0.00989719	-1.47922	0.00234402	-0.574869	0.263776	-0.195116	0.887954	0.70924	0.18596	0.904356	0.112857
ENSMUSG00000028693.15	Nasp	7518	2.9597	6.32212	9.25782	8.70352	1.09647	8.60542e-05	1.648	9.16522e-10	1.55829	5.81396e-09	0.551536	0.276053	0.46182	0.129758	-0.0897159	0.862377
ENSMUSG00000028689.14	Ccdc163	2519	9.51024	4.26339	4.46942	3.95012	-1.16079	3.51126e-06	-1.09397	1.21524e-05	-1.27174	1.99766e-07	0.0668246	0.930023	-0.110946	0.748066	-0.17777	0.660241
ENSMUSG00000033985.17	Tesk2	4272	15.5743	3.92241	3.35959	3.75416	-1.99197	2.16129e-05	-2.21612	1.70974e-06	-2.05527	7.62593e-06	-0.224148	0.861955	-0.0632945	0.930249	0.160853	0.854624
ENSMUSG00000043155.4	Hpdl	1804	2.15135	0.186776	0.36758	0.61521	-3.69599	2.45572e-15	-2.6021	6.92607e-10	-1.83628	5.10754e-06	1.09388	0.258331	1.85971	0.000219453	0.765823	0.175622
ENSMUSG00000033948.3	Zswim5	5582	2.98558	1.10314	1.22795	0.686495	-1.44134	0.000655521	-1.28769	0.00240299	-2.13059	1.41872e-07	0.15365	0.896818	-0.689247	0.142059	-0.842897	0.0889909
ENSMUSG00000073771.11	Btbd19	3883	0.508409	1.47709	2.15741	2.96479	1.55977	6.40424e-09	2.11801	4.28027e-16	2.5729	6.99102e-24	0.558246	0.13974	1.01313	3.28479e-06	0.454888	0.0835739
ENSMUSG00000047671.8	Tctex1d4	1111	0.074727	0.177489	0.152804	1.10175	1.92155	0.269788	1.61093	0.358569	4.86013	0.000723752	-0.310623	0.923691	2.93857	0.00390608	3.24919	0.00235969
ENSMUSG00000028680.14	Plk3	2531	0.835902	5.26745	4.59833	14.7404	2.68128	3.07348e-09	2.48454	4.09538e-08	4.16844	1.56324e-21	-0.196746	0.871693	1.48715	0.000606717	1.6839	0.000124471
ENSMUSG00000028678.13	Kif2c	4363	0.525596	3.98384	5.07244	4.19537	2.95043	4.52893e-13	3.30161	2.81976e-16	3.02617	5.84493e-14	0.351186	0.709885	0.0757463	0.897891	-0.27544	0.663053
ENSMUSG00000028542.17	Slc6a9	5141	8.68419	5.355	3.90172	6.84237	-0.698195	0.160187	-1.15647	0.0113922	-0.344688	0.492947	-0.458277	0.645784	0.353507	0.521376	0.811784	0.126111
ENSMUSG00000028541.14	B4galt2	5031	1.83041	4.58098	3.75594	1.53368	1.32763	0.00696028	1.04103	0.0379739	-0.254837	0.650531	-0.286595	0.814248	-1.58246	0.000687217	-1.29587	0.0105832
ENSMUSG00000028538.12	St3gal3	2768	9.55064	6.11355	4.56346	3.56653	-0.644537	0.0431294	-1.06997	0.000329757	-1.42175	8.07091e-07	-0.425428	0.492528	-0.777211	0.0109873	-0.351783	0.394072
ENSMUSG00000006390.15	Elovl1	2726	11.4558	19.615	20.2572	42.2022	0.776892	0.000247803	0.823232	8.54889e-05	1.88295	1.74383e-21	0.0463408	0.94094	1.10606	1.00817e-08	1.05972	6.74518e-08
ENSMUSG00000006398.15	Cdc20	1868	3.41438	14.6625	22.2164	21.9344	2.10939	2.26139e-06	2.71072	5.20522e-10	2.6916	5.10389e-10	0.60133	0.520515	0.582204	0.254834	-0.0191256	0.985047
ENSMUSG00000033191.14	Tie1	4917	2.75336	8.64787	6.95105	14.5089	1.65429	3.385e-05	1.33925	0.000945262	2.4017	3.75662e-10	-0.315038	0.747059	0.747407	0.0819175	1.06245	0.0134604
ENSMUSG00000050854.9	Tmem125	2339	3.32445	2.74592	2.66743	6.9648	-0.276754	0.628503	-0.32111	0.552851	1.06999	0.0172541	-0.0443567	0.975441	1.34675	0.00216074	1.3911	0.00222134
ENSMUSG00000024903.10	Lao1	2538	1.94202	0.0210436	0.0170016	0.0206284	-8.61147	1.12118e-13	-9.35412	4.44742e-16	-8.80903	1.65946e-14	-0.742658	0.883912	-0.19756	0.943183	0.545098	0.869194
ENSMUSG00000028643.11	Svbp	1065	4.63667	11.6693	12.1488	12.2841	1.34248	1.96694e-06	1.40498	5.14584e-07	1.41665	2.9034e-07	0.0624987	0.938767	0.0741769	0.846896	0.0116781	0.985047
ENSMUSG00000028641.16	P3h1	3846	2.75275	18.9072	18.9369	4.64705	2.78486	1.54373e-14	2.78746	1.23305e-14	0.758196	0.0546873	0.00259371	0.999695	-2.02667	5.61517e-09	-2.02926	7.4223e-09
ENSMUSG00000028639.14	Ybx1	2531	62.6346	126.8	143.4	185.534	1.01771	7.12221e-06	1.1954	8.2426e-08	1.56688	6.4279e-13	0.177694	0.753476	0.54917	0.02079	0.371476	0.192173
ENSMUSG00000060288.13	Ppih	1894	3.55421	4.98876	7.0377	7.17241	0.492188	0.0890979	0.995915	0.000133836	1.01882	6.86332e-05	0.503727	0.279659	0.526636	0.0499695	0.0229086	0.965671
ENSMUSG00000087385.8	Frg2f1	2760	1.78589	1.01855	0.981377	0.734218	-0.821524	0.000371839	-0.890269	9.73963e-05	-1.30074	6.17853e-09	-0.0687443	0.918564	-0.479214	0.0596814	-0.41047	0.161587
ENSMUSG00000023247.2	Guca2a	594	0.286778	0.32797	0.468012	1.99046	0.273794	0.89916	0.895813	0.627237	3.17336	0.0338577	0.622019	0.874265	2.89957	0.0474984	2.27755	0.171981
ENSMUSG00000091297.2	Gm8439	420	4.29897	1.52946	0.666171	0.30194	-1.55112	0.0664369	-2.90628	0.00039761	-4.43063	5.57317e-07	-1.35516	0.418558	-2.87951	0.00256006	-1.52435	0.226621
ENSMUSG00000070803.6	Cited4	1249	36.6047	4.05524	4.88949	2.23879	-3.18432	3.06881e-08	-2.91206	4.18557e-07	-4.05082	6.68156e-13	0.272258	0.866798	-0.866505	0.199862	-1.13876	0.109099
ENSMUSG00000028631.7	Kcnq4	4024	4.33182	0.70556	0.445194	0.451961	-2.63713	5.02948e-09	-3.33688	1.16714e-13	-3.28764	1.42346e-13	-0.69975	0.484402	-0.65051	0.234136	0.0492398	0.961202
ENSMUSG00000028656.14	Cap1	3494	45.2616	98.4696	96.7981	126.002	1.12167	1.14224e-13	1.09712	3.39472e-13	1.47736	1.93896e-23	-0.0245515	0.959264	0.355684	0.0305914	0.380235	0.0289797
ENSMUSG00000028655.11	Mfsd2a	2250	4.8408	8.60194	9.14037	17.7699	0.832027	0.11361	0.920091	0.0703318	1.88019	4.8895e-05	0.088064	0.951451	1.04816	0.0338095	0.960097	0.0789005
ENSMUSG00000032744.4	Heyl	5113	2.10699	4.96208	6.76096	6.79552	1.23891	0.00320288	1.6867	3.04101e-05	1.6934	2.14735e-05	0.447792	0.613545	0.454491	0.340649	0.00669964	0.995658
ENSMUSG00000028649.21	Macf1	32385	19.0137	23.5156	23.4905	45.282	0.306586	0.173874	0.305048	0.166506	1.25195	4.56232e-11	-0.0015379	0.999522	0.945362	4.79168e-07	0.9469	6.89433e-07
ENSMUSG00000023075.9	Akirin1	3450	7.72859	14.5273	16.2145	24.3662	0.911848	1.16003e-05	1.0713	1.59322e-07	1.65803	5.56399e-17	0.15945	0.754137	0.746183	0.000213003	0.586733	0.00751561
ENSMUSG00000043333.12	Rhbdl2	3070	0.590683	3.20836	2.93687	4.72514	2.46859	3.22965e-06	2.34101	1.01464e-05	3.02776	4.04558e-09	-0.127579	0.933657	0.559178	0.356735	0.686757	0.311481
ENSMUSG00000032643.12	Fhl3	1683	1.67824	14.2762	13.0892	12.6937	3.1098	3.83144e-20	2.98481	1.16869e-18	2.93978	2.70501e-18	-0.124982	0.894585	-0.170019	0.699027	-0.0450374	0.948775
ENSMUSG00000078570.10	1110065P20Rik	2069	7.37751	4.48479	3.63441	3.99964	-0.722286	0.00259694	-1.02039	1.08724e-05	-0.888357	0.000108703	-0.298103	0.555707	-0.166072	0.57888	0.132032	0.737752
ENSMUSG00000028873.16	Cdca8	5177	0.627549	3.51345	5.11612	4.9067	2.50115	2.80036e-12	3.0464	5.71001e-18	2.98494	1.89956e-17	0.545255	0.438356	0.483796	0.226857	-0.0614592	0.931185
ENSMUSG00000042677.7	Zc3h12a	2882	5.73225	11.4552	9.20982	13.9284	1.00067	9.73783e-07	0.684756	0.0011494	1.28308	9.34473e-11	-0.315912	0.437704	0.282416	0.218634	0.598328	0.00515848
ENSMUSG00000028859.14	Csf3r	3609	0.450186	13.9911	7.42993	46.9827	4.99958	1.53937e-12	4.08552	9.95117e-09	6.74819	1.79168e-22	-0.914064	0.548454	1.7486	0.0177798	2.66267	0.000199777
ENSMUSG00000050212.4	Eva1b	1942	3.55963	10.743	7.3446	6.34721	1.60062	3.17768e-14	1.05287	1.21832e-06	0.839827	0.000114491	-0.547751	0.089794	-0.760793	0.000179354	-0.213042	0.47871
ENSMUSG00000028849.17	Map7d1	3652	15.2089	43.3126	39.0213	41.7301	1.51059	3.09091e-07	1.36002	4.41092e-06	1.45692	5.69836e-07	-0.150576	0.85267	-0.053668	0.904427	0.0969079	0.863364
ENSMUSG00000056174.8	Col8a2	4489	1.29588	36.4791	19.5717	0.829024	4.8264	2.4611e-19	3.92769	3.96322e-13	-0.64887	0.300253	-0.898707	0.418558	-5.47527	2.92103e-28	-4.57656	1.27644e-19
ENSMUSG00000042500.11	Ago4	6947	6.32774	2.49256	1.85896	2.0874	-1.34586	0.00364854	-1.77325	7.38605e-05	-1.60279	0.000305616	-0.427394	0.683258	-0.25693	0.66348	0.170464	0.836519
ENSMUSG00000042489.15	Clspn	7186	0.395271	2.94124	4.0815	3.37004	2.92116	3.25685e-20	3.39634	3.19837e-27	3.1186	3.12486e-23	0.475177	0.440454	0.197434	0.617408	-0.277743	0.539473
ENSMUSG00000073755.4	5730409E04Rik	2891	9.44708	5.44682	5.15839	3.23792	-0.797172	5.01096e-06	-0.873608	4.3611e-07	-1.54847	4.71298e-20	-0.076436	0.878846	-0.7513	1.38277e-05	-0.674864	0.000194893
ENSMUSG00000028833.13	Ncdn	3710	24.0873	10.9789	9.46017	8.17602	-1.1351	1.33066e-17	-1.35052	1.48505e-24	-1.56011	1.02763e-32	-0.215418	0.44837	-0.425004	0.00270827	-0.209587	0.249366
ENSMUSG00000028830.14	AU040320	6259	27.5698	13.0157	11.8194	10.7397	-1.08346	9.65738e-10	-1.22291	2.99382e-12	-1.36087	4.17146e-15	-0.139453	0.758204	-0.277418	0.177253	-0.137965	0.627824
ENSMUSG00000042408.13	Zmym6	7692	4.56664	2.68413	2.56513	2.17176	-0.767517	9.47476e-05	-0.83693	1.64743e-05	-1.07405	1.35708e-08	-0.0694131	0.902147	-0.306533	0.164818	-0.23712	0.380283
ENSMUSG00000070737.10	Tmem35b	1910	7.16419	3.93623	3.06431	3.29411	-0.865084	8.59062e-06	-1.24024	9.15339e-11	-1.12721	2.32391e-09	-0.375153	0.329855	-0.262126	0.25203	0.113027	0.737695
ENSMUSG00000050234.7	Gja4	1685	2.18082	3.66803	3.25669	9.29475	0.757194	0.237518	0.585353	0.365933	2.10524	0.000110664	-0.17184	0.912979	1.34804	0.0169787	1.51988	0.00944964
ENSMUSG00000046623.8	Gjb4	1446	0.394173	4.7861	6.51191	8.12667	3.7198	7.19766e-08	4.16605	1.01176e-09	4.48648	2.80834e-11	0.446241	0.781258	0.766675	0.300136	0.320435	0.768477
ENSMUSG00000042357.2	Gjb5	1721	0.287945	1.26341	0.901033	0.674349	2.23463	0.000469136	1.7355	0.0081022	1.29905	0.0496643	-0.499126	0.700991	-0.935572	0.127662	-0.436446	0.613165
ENSMUSG00000028796.17	Phc2	7064	8.65545	13.5785	15.3705	17.5523	0.650251	6.06351e-06	0.829927	3.43027e-09	1.02087	1.28731e-13	0.179676	0.559293	0.370619	0.0117816	0.190944	0.315676
ENSMUSG00000028794.13	A3galt2	3588	1.69014	0.534987	0.314869	0.358298	-1.68297	0.000218877	-2.49277	3.17465e-08	-2.27949	2.52522e-07	-0.809805	0.387307	-0.596524	0.271084	0.213282	0.802066
ENSMUSG00000028789.16	Azin2	4024	0.996957	3.53944	2.64085	1.2633	1.83974	1.5135e-05	1.41656	0.00110021	0.346934	0.480047	-0.423179	0.656562	-1.4928	0.000284655	-1.06962	0.0204393
ENSMUSG00000028792.14	Ak2	2140	10.7434	23.7658	26.3904	26.7321	1.14701	1.88191e-05	1.2991	8.72855e-07	1.31655	4.48066e-07	0.152096	0.829724	0.169543	0.621932	0.0174467	0.976013
ENSMUSG00000028793.15	Rnf19b	2872	5.93014	23.3241	19.2103	20.6021	1.9787	3.32451e-23	1.69876	2.52789e-17	1.79891	1.61294e-19	-0.279944	0.517573	-0.179787	0.476377	0.100158	0.777811
ENSMUSG00000028786.15	Tmem54	1222	1.66186	11.7357	8.21511	10.6552	2.84722	1.2083e-06	2.33036	8.67989e-05	2.70658	2.89459e-06	-0.516863	0.703284	-0.14064	0.864322	0.376222	0.685299
ENSMUSG00000001334.9	Fndc5	2763	0.436869	3.11301	1.48692	0.311541	2.87743	2.16713e-10	1.80399	0.000126659	-0.522683	0.338981	-1.07344	0.114671	-3.40011	9.51007e-17	-2.32667	9.98391e-08
ENSMUSG00000001333.9	Sync	2862	0.912707	2.06134	1.72008	0.550004	1.18859	0.111002	0.919485	0.224105	-0.742496	0.321705	-0.2691	0.887457	-1.93108	0.0044424	-1.66198	0.0250942
ENSMUSG00000047945.6	Marcksl1	1605	17.8963	122.554	130.766	146.81	2.77785	3.66249e-22	2.87154	1.07036e-23	3.03844	1.25129e-26	0.0936902	0.913062	0.260593	0.4825	0.166903	0.740076
ENSMUSG00000028800.15	Hdac1	3445	15.5805	23.0492	28.272	32.541	0.565281	0.0349816	0.860756	0.000643367	1.06309	1.31875e-05	0.295475	0.587054	0.497811	0.0621895	0.202336	0.592727
ENSMUSG00000000409.14	Lck	2929	0.515684	1.64605	1.27581	1.80661	1.70816	0.000508015	1.33674	0.00774865	1.84351	0.000107335	-0.371423	0.737608	0.135346	0.831668	0.506768	0.427926
ENSMUSG00000050493.8	Fam167b	959	0.303059	3.24026	2.92654	1.20426	3.63406	2.71759e-12	3.49475	1.71956e-11	2.18236	5.28228e-05	-0.139311	0.866219	-1.4517	2.36844e-06	-1.31239	4.46217e-05
ENSMUSG00000078552.10	Dcdc2b	1371	2.34417	0.634548	0.466541	0.635672	-1.94097	0.00846057	-2.43436	0.000748127	-1.93363	0.00651688	-0.493391	0.793694	0.0073442	0.997791	0.500735	0.66766
ENSMUSG00000028795.15	Ccdc28b	2026	7.85139	4.27607	2.75599	1.88742	-0.880143	0.0015567	-1.52429	1.15856e-08	-2.06449	4.94322e-15	-0.644144	0.163981	-1.18434	1.02053e-05	-0.540198	0.110063
ENSMUSG00000028788.14	Ptp4a2	4377	37.6089	75.3402	74.2104	102.906	1.00257	4.49202e-06	0.980844	6.81158e-06	1.45242	5.63379e-12	-0.0217291	0.975997	0.449844	0.0561992	0.471573	0.0632088
ENSMUSG00000028782.14	Adgrb2	6487	0.63344	0.636378	1.18925	0.347857	0.00583834	0.999948	0.917847	0.278995	-0.874064	0.285574	0.912009	0.567343	-0.879902	0.312714	-1.79191	0.0302243
ENSMUSG00000040690.15	Col16a1	6750	9.95652	51.5062	47.4361	5.77618	2.3718	1.83324e-10	2.25311	1.32324e-09	-0.785852	0.0491593	-0.118697	0.913733	-3.15766	2.80256e-20	-3.03896	1.35461e-18
ENSMUSG00000028776.14	Tinagl1	4358	17.0373	17.1114	21.078	45.6802	0.00624828	0.998192	0.307424	0.657936	1.42337	0.010848	0.301176	0.838166	1.41712	0.0122712	1.11594	0.0827137
ENSMUSG00000023232.17	Serinc2	2319	11.2117	63.2815	72.5836	101.436	2.49881	1.39102e-09	2.69687	4.20234e-11	3.1796	3.10165e-15	0.198054	0.863798	0.680788	0.147636	0.482735	0.411964
ENSMUSG00000028773.8	Fabp3	823	4.41715	1.19059	0.954732	0.756077	-1.94479	5.98073e-05	-2.24853	3.27093e-06	-2.6252	4.09218e-08	-0.303739	0.822543	-0.680407	0.256682	-0.376667	0.651041
ENSMUSG00000074088.6	Snrnp40	3987	2.95929	4.55438	5.83864	6.04834	0.623708	0.0287373	0.985519	0.000225276	1.034	7.8078e-05	0.361811	0.512806	0.41029	0.160515	0.0484793	0.925965
ENSMUSG00000078532.9	Nkain1	1426	1.07353	2.1217	2.82268	1.53629	1.00459	0.143174	1.42475	0.0261226	0.534266	0.438973	0.420159	0.77716	-0.470329	0.527817	-0.890487	0.239101
ENSMUSG00000025743.14	Sdc3	5989	8.11346	35.3077	34.947	25.6186	2.12266	1.39443e-15	2.10783	1.85784e-15	1.65991	4.64195e-10	-0.0148341	0.988014	-0.462748	0.130196	-0.447914	0.194496
ENSMUSG00000028581.17	Laptm5	3788	3.89274	41.6763	23.9655	34.3656	3.42438	2.46778e-09	2.62562	6.60492e-06	3.14605	3.27557e-08	-0.798759	0.520515	-0.278326	0.72336	0.520433	0.55174
ENSMUSG00000070720.4	Tmem200b	1476	13.4929	5.34158	4.43502	4.84351	-1.34191	0.0242224	-1.60972	0.00517656	-1.48272	0.00897786	-0.267807	0.861504	-0.140811	0.860652	0.126995	0.907746
ENSMUSG00000028906.17	Epb41	16386	41.4472	10.2482	9.15142	10.2958	-2.01614	1.32785e-10	-2.17976	2.45387e-12	-2.00958	9.31781e-11	-0.163626	0.852413	0.00655091	0.992408	0.170177	0.7583
ENSMUSG00000040025.17	Ythdf2	4572	10.8318	14.5574	18.0648	23.7012	0.426937	0.0270998	0.739336	3.94449e-05	1.1303	6.39886e-11	0.312399	0.372952	0.703363	5.15743e-05	0.390964	0.0565337
ENSMUSG00000089687.2	Rab42	761	1.2492	0.644824	0.576447	0.338606	-1.01282	0.0934421	-1.17268	0.0461028	-2.0663	0.0003956	-0.159864	0.923691	-1.05348	0.118207	-0.893616	0.265666
ENSMUSG00000028896.13	Rcc1	3848	3.24347	7.57009	9.55745	10.1312	1.22561	8.71804e-09	1.56443	6.85151e-14	1.64646	1.75357e-15	0.338826	0.420636	0.420848	0.0629395	0.0820219	0.83004
ENSMUSG00000056529.7	Ptafr	3637	0.793979	9.18114	5.27389	15.1077	3.55275	1.40654e-07	2.75101	6.07295e-05	4.27199	9.14481e-11	-0.801735	0.587432	0.719237	0.373638	1.52097	0.0478
ENSMUSG00000028885.8	Smpdl3b	2006	1.72924	1.76142	2.36932	3.53277	0.0250206	0.972746	0.458331	0.353795	1.03486	0.0166546	0.43331	0.64924	1.00984	0.0196371	0.576533	0.289048
ENSMUSG00000028884.14	Rpa2	2993	2.26969	4.18319	5.86027	5.62459	0.886621	0.00335073	1.3779	1.56464e-06	1.31664	3.56451e-06	0.491277	0.375154	0.430019	0.176695	-0.0612579	0.911855
ENSMUSG00000037731.5	Themis2	3079	0.907756	7.63408	6.01062	9.33004	3.09442	2.34616e-08	2.74798	7.99714e-07	3.38451	5.0289e-10	-0.346432	0.808724	0.290093	0.691546	0.636525	0.406839
ENSMUSG00000028874.14	Fgr	3863	0.349367	4.90187	2.92836	11.4376	3.85667	4.80634e-09	3.11096	3.05673e-06	5.08106	2.53072e-15	-0.745712	0.59989	1.22439	0.0811214	1.9701	0.00379646
ENSMUSG00000028860.13	Sytl1	2518	14.9675	5.10129	3.45287	5.34857	-1.55605	0.0723067	-2.12224	0.00959249	-1.48842	0.0722732	-0.566188	0.77695	0.0676267	0.956061	0.633815	0.600642
ENSMUSG00000046694.6	Tent5b	2287	10.9749	4.64393	3.02713	7.22335	-1.24403	0.0659867	-1.86595	0.00328391	-0.605177	0.380893	-0.621915	0.663436	0.638855	0.391104	1.26077	0.0827957
ENSMUSG00000056596.8	Trnp1	1654	3.52417	1.37214	1.11516	0.487478	-1.37571	1.87892e-06	-1.685	4.83052e-09	-2.91747	7.45236e-22	-0.30929	0.662452	-1.54176	1.41388e-06	-1.23247	0.000354837
ENSMUSG00000047281.3	Sfn	1613	4.86292	41.7249	82.4838	275.008	3.10867	3.28212e-05	4.09245	2.05357e-08	5.82999	2.76208e-16	0.983782	0.535083	2.72132	0.000196173	1.73754	0.0387941
ENSMUSG00000037553.14	Zdhhc18	5382	4.15457	8.13771	9.38913	10.4114	0.971379	1.93387e-05	1.17818	1.25203e-07	1.32759	1.34839e-09	0.206801	0.693802	0.356214	0.155657	0.149414	0.678106
ENSMUSG00000043257.15	Pigv	4180	5.72384	3.08081	2.80803	3.01759	-0.896198	1.23767e-07	-1.03667	6.46848e-10	-0.929252	2.23691e-08	-0.140474	0.743925	-0.0330539	0.898135	0.10742	0.708546
ENSMUSG00000012117.13	Dhdds	3784	20.4651	9.67539	9.60519	8.94336	-1.0817	5.18603e-23	-1.09203	1.65429e-23	-1.19422	3.18622e-28	-0.0103296	0.978838	-0.112518	0.427415	-0.102189	0.557226
ENSMUSG00000012123.17	Crybg2	7801	0.260041	2.87724	2.4709	6.50849	3.49748	5.84289e-07	3.27726	2.86916e-06	4.6763	5.69769e-12	-0.220218	0.911114	1.17882	0.123753	1.39904	0.0851064
ENSMUSG00000000682.7	Cd52	1187	405.101	50.0616	26.8994	19.7785	-3.01746	0.000186055	-3.91467	6.38404e-07	-4.35863	1.72386e-08	-0.897203	0.611375	-1.34117	0.131522	-0.443964	0.741834
ENSMUSG00000012126.16	Ubxn11	4742	2.53728	0.789334	0.783309	0.691071	-1.69564	2.14224e-05	-1.7096	1.64916e-05	-1.88412	1.29211e-06	-0.0139624	0.993577	-0.188482	0.730364	-0.17452	0.810289
ENSMUSG00000028841.14	Cnksr1	2804	7.12439	4.73486	5.62083	9.81236	-0.590707	0.0666886	-0.342147	0.312155	0.461541	0.139157	0.24856	0.724852	1.05225	0.000248926	0.803688	0.010632
ENSMUSG00000050105.5	Grrp1	1275	1.76361	4.29107	3.8358	8.21786	1.30125	0.00894956	1.13397	0.0236537	2.24437	1.04784e-06	-0.167276	0.897643	0.943123	0.0516687	1.1104	0.0282302
ENSMUSG00000028836.14	Slc30a2	3564	16.791	3.91005	1.50771	0.113236	-2.10582	0.123176	-3.49024	0.0055817	-7.37186	7.64244e-10	-1.38441	0.605829	-5.26604	1.21146e-05	-3.88163	0.00307962
ENSMUSG00000028832.11	Stmn1	1922	8.74202	28.367	47.2759	39.12	1.70091	4.96049e-06	2.43863	1.56982e-11	2.16514	2.05143e-09	0.737723	0.285223	0.464229	0.283811	-0.273494	0.639805
ENSMUSG00000037348.15	Paqr7	4259	2.60393	2.25238	1.46614	3.3459	-0.209281	0.658493	-0.835447	0.0305622	0.36376	0.366934	-0.626166	0.382237	0.573041	0.154401	1.19921	0.00131793
ENSMUSG00000078521.2	Aunip	1275	0.128187	1.14729	1.75115	1.57112	3.53055	1.39014e-06	4.16919	5.45977e-09	4.00644	1.67447e-08	0.638636	0.390781	0.475881	0.275761	-0.162755	0.801417
ENSMUSG00000050989.9	Selenon	3619	6.86674	28.1898	24.7754	15.0868	2.03944	1.82794e-10	1.85314	7.30087e-09	1.13749	0.000522015	-0.186301	0.830238	-0.901952	0.00698193	-0.715652	0.0568165
ENSMUSG00000037306.13	Man1c1	5722	16.0543	20.5415	14.9502	6.45075	0.355785	0.504644	-0.103096	0.860672	-1.31593	0.00221521	-0.458882	0.63282	-1.67171	5.94524e-05	-1.21283	0.00831497
ENSMUSG00000037266.18	Rsrp1	3349	101.598	61.978	60.4546	48.2452	-0.713138	0.00326131	-0.749424	0.00171507	-1.07469	2.61942e-06	-0.0362865	0.959989	-0.36155	0.170634	-0.325263	0.294913
ENSMUSG00000070691.10	Runx3	5003	0.397456	3.23646	2.57566	1.50267	3.05339	4.62721e-13	2.72271	1.28647e-10	1.94337	5.88328e-06	-0.330675	0.740857	-1.11002	0.0083547	-0.779342	0.11398
ENSMUSG00000037242.8	Clic4	6572	34.2248	47.7073	66.9187	90.7748	0.47926	0.248656	0.967584	0.00920953	1.40745	6.61568e-05	0.488324	0.520227	0.928188	0.0119841	0.439864	0.369379
ENSMUSG00000043924.16	Ncmap	2227	0.380469	3.33162	3.34322	6.44256	3.20065	1.48427e-08	3.20931	1.1652e-08	4.15618	4.01674e-14	0.00865979	0.996981	0.955531	0.0934011	0.946872	0.134793
ENSMUSG00000028803.18	Nipal3	7588	12.0613	3.58113	2.59823	5.22277	-1.75298	9.80958e-09	-2.21836	1.74197e-13	-1.20824	8.66459e-05	-0.46538	0.475906	0.544746	0.11489	1.01013	0.00194744
ENSMUSG00000037188.7	Grhl3	2789	0.152532	1.39899	3.23771	15.4708	3.34023	0.029663	4.56113	0.00179792	6.82277	9.82024e-07	1.2209	0.712343	3.48253	0.0154445	2.26163	0.192262
ENSMUSG00000037157.8	Il22ra1	2569	0.218226	1.23862	0.604476	1.13256	2.60586	0.00142665	1.54293	0.0755177	2.47144	0.00201218	-1.06293	0.496992	-0.134416	0.903173	0.928509	0.362178
ENSMUSG00000062585.11	Cnr2	3982	0.0571535	0.965113	0.475212	1.89417	4.36665	5.89717e-08	3.32048	5.56808e-05	5.34673	9.42744e-12	-1.04617	0.416371	0.980081	0.166988	2.02625	0.0022899
ENSMUSG00000028671.16	Gale	2370	7.45163	11.5764	14.6317	17.7577	0.637157	0.118809	0.976105	0.0101009	1.25498	0.000553538	0.338948	0.689913	0.617821	0.124009	0.278873	0.619914
ENSMUSG00000018983.9	E2f2	4882	0.873717	2.39595	4.2545	5.23691	1.46554	4.39527e-06	2.29764	7.71652e-14	2.5969	1.21136e-17	0.832103	0.0775151	1.13136	0.000148412	0.299255	0.496081
ENSMUSG00000036995.7	Asap3	4225	2.82334	7.28751	6.08413	3.87364	1.37045	2.38967e-05	1.1097	0.000751735	0.457702	0.193572	-0.260748	0.738297	-0.912743	0.00523395	-0.651995	0.0838729
ENSMUSG00000001089.14	Luzp1	8112	8.4534	19.2723	20.593	24.534	1.18957	3.41595e-27	1.28514	1.02466e-31	1.53776	1.68611e-45	0.0955729	0.728075	0.348192	0.00236654	0.252619	0.0520258
ENSMUSG00000028664.14	Ephb2	12608	0.529252	8.74767	5.74945	3.66822	4.05575	3.7253e-12	3.45011	4.1265e-09	2.8013	1.93453e-06	-0.605634	0.658408	-1.25445	0.0494443	-0.648817	0.445177
ENSMUSG00000036905.8	C1qb	1088	10.8901	152.049	97.6816	35.296	3.80868	1.4406e-13	3.16984	9.78231e-10	1.70062	0.00150494	-0.638836	0.582379	-2.10806	4.34392e-05	-1.46922	0.0104033
ENSMUSG00000036896.5	C1qc	1931	6.59587	80.5439	51.3694	18.8304	3.6148	2.96734e-12	2.96543	1.32402e-08	1.51694	0.00515701	-0.649369	0.574474	-2.09786	5.09506e-05	-1.44849	0.012171
ENSMUSG00000036887.5	C1qa	1040	13.1403	173.216	117.683	38.7729	3.72497	4.51398e-13	3.16693	9.19166e-10	1.5645	0.00364318	-0.558047	0.642647	-2.16048	2.52448e-05	-1.60243	0.00423198
ENSMUSG00000036856.4	Wnt4	4194	15.0569	11.8894	6.25882	11.2643	-0.34102	0.666001	-1.26835	0.0495629	-0.419203	0.549271	-0.927329	0.447947	-0.0781821	0.933073	0.849147	0.285538
ENSMUSG00000006699.17	Cdc42	2966	63.2711	111.055	109.276	130.978	0.81185	5.79853e-08	0.788782	1.29192e-07	1.04987	5.96501e-13	-0.0230673	0.960719	0.238022	0.163054	0.261089	0.164286
ENSMUSG00000028763.18	Hspg2	14739	34.9704	86.5231	67.9522	25.0725	1.30702	2.52352e-05	0.958417	0.00256087	-0.480036	0.148936	-0.348602	0.610443	-1.78705	5.54028e-10	-1.43845	1.75811e-06
ENSMUSG00000043411.15	Usp48	9686	16.6414	10.4701	9.64586	8.2099	-0.668802	5.17714e-07	-0.788018	1.91766e-09	-1.0197	2.45223e-15	-0.119215	0.711817	-0.350897	0.0119852	-0.231682	0.166704
ENSMUSG00000041351.16	Rap1gap	6429	0.920878	4.78987	3.01328	6.15107	2.38792	1.88726e-06	1.71675	0.000831348	2.74886	1.89649e-08	-0.671174	0.526185	0.360935	0.571093	1.03211	0.0764339
ENSMUSG00000028766.10	Alpl	4033	3.62859	2.10069	1.46676	0.790511	-0.791846	0.404402	-1.3167	0.128012	-2.21289	0.00555715	-0.524849	0.79584	-1.42104	0.100417	-0.896191	0.418492
ENSMUSG00000057530.14	Ece1	5300	15.3872	33.7967	37.0214	57.2254	1.13555	2.59108e-07	1.26727	5.98937e-09	1.89552	4.43098e-19	0.131713	0.823182	0.759962	0.00058968	0.628249	0.00868027
ENSMUSG00000028760.16	Eif4g3	11063	34.3439	17.7546	17.4886	16.6019	-0.952084	7.44336e-12	-0.974055	1.84545e-12	-1.04921	1.83585e-14	-0.0219711	0.960484	-0.0971225	0.600215	-0.0751515	0.760647
ENSMUSG00000045349.15	Sh2d5	3740	0.123394	2.76604	3.43624	6.78744	4.6291	6.83291e-08	4.94473	6.09674e-09	5.92836	1.29052e-12	0.315626	0.890917	1.29926	0.146298	0.983635	0.369733
ENSMUSG00000028756.12	Pink1	2673	64.2859	19.4589	12.1822	17.9356	-1.72458	3.76462e-14	-2.40268	1.04404e-26	-1.84306	2.80412e-16	-0.678097	0.057873	-0.118483	0.70885	0.559615	0.0372881
ENSMUSG00000028755.3	Cda	1035	1.18971	13.0479	7.3415	5.10837	3.50203	4.36317e-09	2.66865	1.10144e-05	2.13989	0.000447368	-0.833379	0.489892	-1.36213	0.0249094	-0.528754	0.539304
ENSMUSG00000043621.13	Ubxn10	4564	0.0549436	0.252747	0.2263	1.06966	2.42822	0.0150665	2.27147	0.0226484	4.5514	5.52662e-07	-0.156752	0.950771	2.12318	0.0106442	2.27993	0.00873781
ENSMUSG00000041202.12	Pla2g2d	2243	0.543903	1.12236	0.282893	0.408564	1.06916	0.0896615	-0.981124	0.136583	-0.436231	0.516776	-2.05029	0.00844835	-1.50539	0.00872286	0.544893	0.535073
ENSMUSG00000028751.13	Pla2g2e	917	0.159755	0.70567	1.12254	1.13846	2.5547	0.0695409	3.26602	0.014364	3.28456	0.0115791	0.711326	0.799898	0.729866	0.602118	0.0185399	0.995336
ENSMUSG00000041161.8	Otud3	1668	7.26772	8.51261	11.6646	16.3197	0.228807	0.65559	0.686319	0.109796	1.1707	0.00298316	0.457513	0.593153	0.941897	0.0204273	0.484384	0.361015
ENSMUSG00000070661.7	Rnf186	1254	0.8116	7.96189	15.3577	14.7974	3.34876	5.68073e-05	4.30064	1.15627e-07	4.24636	1.25602e-07	0.951878	0.586653	0.897601	0.343571	-0.0542776	0.97536
ENSMUSG00000041120.6	Nbl1	2033	26.5682	64.7538	39.1151	24.7382	1.286	0.00600546	0.558272	0.278487	-0.102766	0.856711	-0.727723	0.41838	-1.38876	0.00209363	-0.661038	0.255958
ENSMUSG00000028745.18	Capzb	3299	39.1427	73.8686	69.9689	86.6923	0.916425	1.27136e-06	0.838345	9.75688e-06	1.1473	4.43119e-10	-0.07808	0.886766	0.23088	0.300861	0.30896	0.196474
ENSMUSG00000041025.15	Iffo2	6216	4.31955	8.18039	10.7771	18.1283	0.922348	0.0108011	1.32079	0.000127389	2.07112	3.77351e-10	0.398447	0.596267	1.14877	0.00072726	0.750327	0.0558403
ENSMUSG00000028737.15	Aldh4a1	4907	13.164	4.41289	4.08811	4.51684	-1.57921	2.20704e-14	-1.68847	2.25103e-16	-1.54654	4.20992e-14	-0.10926	0.85267	0.032667	0.920507	0.141927	0.685716
ENSMUSG00000040945.13	Rcc2	4155	17.1039	36.3618	40.9081	38.879	1.08865	4.96952e-12	1.25924	6.4326e-16	1.18531	2.33937e-14	0.170596	0.640706	0.0966627	0.646717	-0.0739336	0.795063
ENSMUSG00000025330.6	Padi4	4835	0.104479	4.89472	5.24362	16.6388	5.68758	4.47619e-16	5.78707	1.103e-16	7.45468	2.15308e-27	0.0994938	0.960454	1.7671	0.00780931	1.66761	0.0193923
ENSMUSG00000025328.9	Padi3	3447	0.0421809	0.356306	0.297263	2.21256	3.53214	0.00800705	3.26483	0.0142275	6.21111	4.39867e-07	-0.267311	0.933657	2.67896	0.0146332	2.94628	0.0101057
ENSMUSG00000025329.3	Padi1	3754	0.18749	0.747639	1.38469	6.84022	2.06608	0.0463931	2.96656	0.0023988	5.27935	9.80464e-09	0.900483	0.672915	3.21327	0.000396747	2.31278	0.0222774
ENSMUSG00000028927.6	Padi2	5013	0.641281	13.828	7.36954	1.77719	4.4501	2.74912e-07	3.54132	5.47429e-05	1.48464	0.112241	-0.908784	0.645413	-2.96546	0.000613485	-2.05667	0.0364968
ENSMUSG00000036622.15	Atp13a2	6000	17.3361	9.58238	7.24308	7.70133	-0.855705	0.0163582	-1.26056	0.000195202	-1.17105	0.000473056	-0.404856	0.583811	-0.315343	0.445389	0.0895135	0.89068
ENSMUSG00000060572.17	Mfap2	1211	2.18814	26.0457	16.9837	5.96202	3.59521	3.40408e-10	2.97761	2.52146e-07	1.46218	0.0155851	-0.617597	0.630347	-2.13303	0.000153268	-1.51543	0.0160188
ENSMUSG00000028919.11	Arhgef19	4242	13.1819	5.61731	4.83093	3.81613	-1.23247	0.0220464	-1.44962	0.00542464	-1.79173	0.000363512	-0.217148	0.880377	-0.559259	0.353798	-0.342111	0.67428
ENSMUSG00000006445.3	Epha2	4674	2.00055	9.0725	12.9708	42.0572	2.18627	2.67832e-05	2.70279	1.15699e-07	4.40027	5.27933e-19	0.516521	0.664889	2.214	7.96887e-06	1.69748	0.00145524
ENSMUSG00000006216.10	Clcnkb	2639	4.80113	0.0274728	0.0163509	0.0229304	-8.68213	4.75923e-21	-10.7255	3.01264e-22	-9.46232	2.3315e-18	-2.04336	0.550008	-0.780195	0.711217	1.26317	0.641607
ENSMUSG00000006221.7	Hspb7	2769	5.29512	4.65259	3.71838	0.481875	-0.187172	0.897029	-0.513437	0.689713	-3.49989	0.000517048	-0.326265	0.909718	-3.31271	0.00105738	-2.98645	0.00560104
ENSMUSG00000070637.2	Srarp	905	2.12679	0.243971	0.152618	0.0680219	-3.40971	0.0115582	-4.38649	0.00124377	-6.68671	3.40145e-05	-0.976777	0.785977	-3.277	0.0843025	-2.30022	0.341838
ENSMUSG00000006219.12	Fblim1	4457	7.837	22.1163	21.2879	22.5223	1.49798	1.52207e-13	1.44342	1.02027e-12	1.52461	3.04625e-14	-0.0545604	0.930052	0.0266364	0.9336	0.0811968	0.830154
ENSMUSG00000040659.3	Efhd2	2381	14.0804	50.179	36.0041	47.0929	1.83489	5.84769e-13	1.35537	1.59946e-07	1.74316	5.26413e-12	-0.479518	0.345237	-0.0917305	0.801301	0.387788	0.251838
ENSMUSG00000040606.13	Kazn	10721	1.67563	0.985508	0.67388	0.628329	-0.767421	0.0179717	-1.32447	1.43552e-05	-1.42269	2.0434e-06	-0.557046	0.353647	-0.655269	0.0461874	-0.0982222	0.866859
ENSMUSG00000028583.14	Pdpn	1817	4.14685	25.9616	21.1948	13.5103	2.65308	2.75887e-05	2.35987	0.000209246	1.70978	0.00788507	-0.293214	0.865372	-0.943302	0.184738	-0.650088	0.472997
ENSMUSG00000028591.11	Pramef12	2573	0.316236	1.01826	1.17554	0.224014	1.73905	0.00311277	1.94687	0.000713681	-0.532627	0.430131	0.207812	0.88893	-2.27168	2.31867e-05	-2.47949	4.34421e-06
ENSMUSG00000066026.14	Dhrs3	2927	22.4838	56.4363	53.651	35.9466	1.32835	0.00380976	1.25513	0.00607422	0.677234	0.154104	-0.0732216	0.957725	-0.651116	0.195034	-0.577895	0.332315
ENSMUSG00000028599.10	Tnfrsf1b	3818	3.02543	26.4427	20.3911	27.1996	3.13283	1.36643e-09	2.75764	1.08566e-07	3.17363	4.95699e-10	-0.375192	0.778086	0.0408038	0.960857	0.415995	0.608047
ENSMUSG00000078502.10	Gm13212	3595	0.455041	1.99215	1.67547	1.0211	2.15991	9.15894e-08	1.90694	2.82813e-06	1.18882	0.00458901	-0.252974	0.794958	-0.971087	0.0136983	-0.718113	0.117954
ENSMUSG00000070605.4	Zfp992	4550	0.784872	1.86735	1.37613	0.50647	1.26068	0.00013013	0.814694	0.0180987	-0.642926	0.0695717	-0.445985	0.496173	-1.9036	1.95849e-10	-1.45762	4.23204e-06
ENSMUSG00000063245.11	Zfp993	1275	0.599369	1.73009	1.58581	0.817517	1.59342	0.000205074	1.46532	0.000679467	0.460734	0.343645	-0.128093	0.899201	-1.13268	0.00240547	-1.00459	0.0130089
ENSMUSG00000067916.9	Zfp991	2917	0.566356	2.62896	2.334	2.14503	2.24888	5.31705e-09	2.0761	7.67505e-08	1.95142	3.58873e-07	-0.172782	0.860816	-0.297466	0.506457	-0.124684	0.852055
ENSMUSG00000078496.9	Zfp982	1488	0.691111	1.84002	1.32566	0.799503	1.45096	0.00152632	0.961468	0.0457249	0.230191	0.674094	-0.489493	0.580171	-1.22077	0.00362366	-0.731277	0.156246
ENSMUSG00000019055.15	Plod1	6765	5.44534	21.6677	15.8971	6.84593	1.99361	4.05167e-09	1.54684	6.77623e-06	0.330707	0.39679	-0.44677	0.546749	-1.6629	3.91126e-07	-1.21613	0.00057072
ENSMUSG00000029005.4	Draxin	5200	0.0358876	4.22269	2.0474	0.0499507	7.25576	5.27051e-11	6.20893	2.33715e-08	0.605562	0.668946	-1.04682	0.629512	-6.6502	1.6323e-12	-5.60337	7.83589e-09
ENSMUSG00000029003.11	Mad2l2	2622	2.50983	5.22401	4.72016	4.78147	1.0612	2.17466e-05	0.918298	0.000272656	0.933875	0.000160089	-0.142898	0.821141	-0.127321	0.68825	0.0155767	0.976122
ENSMUSG00000029001.15	Fbxo44	3024	2.78449	1.93434	1.5011	1.13654	-0.526849	0.128388	-0.900673	0.00492663	-1.30311	2.13521e-05	-0.373824	0.583559	-0.776265	0.0169414	-0.402441	0.346099
ENSMUSG00000041556.8	Fbxo2	1288	2.47422	0.767295	0.530857	0.694745	-1.74386	0.00139087	-2.30275	2.06748e-05	-1.88099	0.000367836	-0.55889	0.669286	-0.137127	0.862143	0.421763	0.632388
ENSMUSG00000028989.3	Angptl7	2157	3.27118	14.6481	10.4699	0.194694	2.16965	0.111354	1.68388	0.222595	-4.21496	0.000694384	-0.485774	0.889291	-6.38461	5.38194e-08	-5.89883	9.80803e-07
ENSMUSG00000073705.10	Cenps	1909	0.376865	1.52604	2.19497	2.55863	2.08386	1.94387e-09	2.62727	6.66908e-15	2.83595	1.46887e-17	0.543412	0.194529	0.752087	0.00171645	0.208675	0.545944
ENSMUSG00000028961.15	Pgd	6447	17.2004	25.1332	26.95	41.8855	0.547343	0.132391	0.648114	0.0629122	1.28422	5.59404e-05	0.100771	0.913368	0.736879	0.0306802	0.636108	0.0970819
ENSMUSG00000028988.13	Ctnnbip1	2792	2.81819	7.42254	6.91009	5.95742	1.40277	8.0781e-12	1.30222	2.29668e-10	1.08391	1.37593e-07	-0.100549	0.852963	-0.318863	0.155109	-0.218314	0.443387
ENSMUSG00000039936.18	Pik3cd	6259	1.0001	5.96591	4.11057	4.33968	2.58467	5.11002e-07	2.04566	8.95457e-05	2.12498	3.44759e-05	-0.539006	0.644709	-0.459691	0.469948	0.079315	0.940704
ENSMUSG00000039911.13	Spsb1	4396	1.53039	18.2851	20.6604	10.3504	3.58908	3.83721e-33	3.76534	1.90914e-36	2.76778	3.79771e-20	0.176263	0.828423	-0.821295	0.00894342	-0.997558	0.00163128
ENSMUSG00000028980.14	H6pd	5236	22.5271	50.1419	35.8573	32.2815	1.15471	0.000481226	0.670581	0.0546483	0.519237	0.134937	-0.484127	0.46989	-0.63547	0.070708	-0.151343	0.79156
ENSMUSG00000063524.13	Eno1	5379	18.2789	104.904	133.135	171.113	2.52133	3.78163e-12	2.86523	1.53365e-15	3.22727	1.21935e-19	0.343898	0.695664	0.705939	0.0836074	0.362041	0.508833
ENSMUSG00000039852.17	Rere	8528	39.6909	25.6281	22.2314	19.4564	-0.63121	1.25068e-05	-0.836939	2.90404e-09	-1.02858	1.13572e-13	-0.205729	0.499768	-0.397369	0.00752144	-0.19164	0.325793
ENSMUSG00000028967.10	Errfi1	3582	15.0663	37.5569	23.2675	28.7432	1.31835	0.000214731	0.627176	0.103454	0.932402	0.00934217	-0.691172	0.291766	-0.385946	0.35727	0.305226	0.563524
ENSMUSG00000028957.12	Per3	9608	9.69841	3.10983	2.26664	2.98834	-1.64216	4.65829e-06	-2.10049	2.21982e-09	-1.69963	1.34938e-06	-0.458332	0.557316	-0.0574697	0.916683	0.400862	0.433968
ENSMUSG00000028955.3	Vamp3	2889	11.7793	22.8893	21.9984	30.5873	0.959545	1.1547e-06	0.902749	4.7455e-06	1.3777	4.6071e-13	-0.0567963	0.92155	0.418156	0.0461121	0.474952	0.0309502
ENSMUSG00000039759.10	Thap3	1334	14.5562	6.6553	6.22558	5.14565	-1.13123	4.8319e-11	-1.23469	5.31134e-13	-1.5075	5.49449e-19	-0.103459	0.830308	-0.376271	0.0536817	-0.272813	0.247014
ENSMUSG00000073700.3	Klhl21	3986	24.9865	8.19705	8.28823	10.9578	-1.60911	1.99845e-11	-1.59328	2.66929e-11	-1.19059	7.28364e-07	0.0158316	0.985631	0.418516	0.128619	0.402684	0.195955
ENSMUSG00000028937.14	Acot7	2124	3.5235	10.9325	13.0801	12.8803	1.63983	1.90861e-07	1.89943	9.16522e-10	1.87738	1.05997e-09	0.2596	0.729567	0.237553	0.546615	-0.0220466	0.974536
ENSMUSG00000042804.13	Gpr153	3909	2.72067	18.6439	14.7075	4.10742	2.78211	1.44323e-10	2.43958	2.13574e-08	0.59739	0.219216	-0.342528	0.754137	-2.18472	1.78142e-07	-1.84219	2.61404e-05
ENSMUSG00000028931.12	Kcnab2	6977	0.430563	2.21271	1.68765	1.53693	2.37752	4.76741e-12	1.98295	1.08944e-08	1.8514	8.00266e-08	-0.394572	0.590828	-0.526123	0.16046	-0.131551	0.829373
ENSMUSG00000039577.17	Nphp4	6044	0.482022	0.982933	1.29711	1.13334	1.03806	0.0252813	1.44382	0.00103586	1.24834	0.00435481	0.405764	0.676276	0.210286	0.706589	-0.195478	0.790199
ENSMUSG00000078350.11	Smim1	5761	10.465	3.02526	1.78949	1.21936	-1.79311	2.13521e-06	-2.5544	4.73413e-12	-3.1079	1.80248e-17	-0.761297	0.287143	-1.31479	0.000607107	-0.553492	0.276163
ENSMUSG00000039410.16	Prdm16	9321	8.79301	1.04936	0.784037	2.25092	-3.07346	9.61908e-12	-3.49501	5.70688e-15	-1.9679	1.52687e-05	-0.421551	0.705037	1.10556	0.0239694	1.52711	0.00163444
ENSMUSG00000029059.9	Prxl2b	1027	8.68581	4.5424	4.00692	2.40331	-0.937523	0.00181581	-1.13103	0.000122283	-1.86855	7.50135e-11	-0.193502	0.800754	-0.93103	0.00224419	-0.737528	0.0300564
ENSMUSG00000042333.16	Tnfrsf14	1438	2.87628	7.88524	6.56774	4.62249	1.46541	9.70852e-06	1.19945	0.000360205	0.692599	0.0466056	-0.265956	0.72972	-0.772809	0.0208341	-0.506852	0.212885
ENSMUSG00000029055.17	Plch2	8112	3.42324	2.1016	1.74794	5.7458	-0.705439	0.394774	-0.972097	0.209126	0.747761	0.325548	-0.266658	0.893027	1.4532	0.0473367	1.71986	0.023842
ENSMUSG00000029047.13	Pex10	3298	3.60015	1.40934	1.56116	1.86426	-1.36051	4.68109e-09	-1.2109	1.74263e-07	-0.958992	2.97248e-05	0.149612	0.813637	0.401515	0.131706	0.251903	0.460512
ENSMUSG00000029049.14	Morn1	4320	2.49448	0.942284	0.994035	0.531902	-1.41367	0.00144589	-1.34537	0.00235261	-2.24933	1.10859e-07	0.0682918	0.959562	-0.835661	0.082556	-0.903953	0.0808421
ENSMUSG00000029061.2	Mmp23	2340	1.85949	19.0154	14.4735	1.59608	3.3687	2.91892e-25	2.97379	6.79901e-20	-0.220643	0.589201	-0.394915	0.577558	-3.58934	4.64095e-34	-3.19443	1.07299e-26
ENSMUSG00000029070.9	Mxra8	2918	10.1954	55.3661	37.1064	21.5763	2.44287	3.55688e-09	1.86529	8.98811e-06	1.08287	0.0123742	-0.577578	0.518378	-1.36	0.00127662	-0.782421	0.125518
ENSMUSG00000029072.3	Tas1r3	3523	1.68211	0.346026	0.335848	0.309374	-2.32073	3.68889e-12	-2.4035	5.73863e-13	-2.5018	2.93552e-14	-0.082769	0.94222	-0.18107	0.717821	-0.0983012	0.892355
ENSMUSG00000029034.9	Ints11	3067	6.46939	9.51335	11.6087	15.3128	0.557834	0.0187904	0.847213	0.00015496	1.24526	6.89025e-09	0.289379	0.537673	0.687427	0.00180086	0.398048	0.134508
ENSMUSG00000023571.4	C1qtnf12	1366	13.0352	6.34358	6.7325	4.35545	-1.0436	0.0130197	-0.955479	0.0227312	-1.59183	5.18289e-05	0.0881248	0.94222	-0.548224	0.233919	-0.636349	0.209413
ENSMUSG00000041954.18	Tnfrsf18	1524	0.267588	1.30933	1.23586	1.63946	2.41753	9.65111e-06	2.33051	1.97356e-05	2.74489	2.11872e-07	-0.0870223	0.946398	0.327365	0.53347	0.414388	0.493798
ENSMUSG00000029074.14	Ttll10	3985	8.91927	4.14422	3.25277	3.07244	-1.10769	0.139843	-1.45951	0.0397618	-1.54164	0.0247433	-0.351817	0.84538	-0.433948	0.614392	-0.0821309	0.953547
ENSMUSG00000110404.1	Rnf223	2908	0.140844	0.12579	0.213979	1.6403	-0.18887	0.898506	0.663135	0.595673	3.68573	0.000163632	0.852006	0.718377	3.8746	3.46875e-05	3.02259	0.00204777
ENSMUSG00000041936.18	Agrn	9285	18.2826	29.7765	44.665	50.8153	0.703867	0.0741595	1.289	0.000364968	1.47505	2.83194e-05	0.585132	0.416371	0.771187	0.0431784	0.186054	0.762152
ENSMUSG00000035692.7	Isg15	703	2.79747	31.5309	86.4532	121.248	3.5293	5.54138e-14	4.98655	2.43109e-27	5.47424	4.76453e-33	1.45725	0.0239426	1.94494	1.0865e-05	0.487682	0.45697
ENSMUSG00000078486.3	Perm1	3901	1.36762	0.144814	0.20758	0.281767	-3.35292	1.88262e-19	-2.78034	2.75524e-15	-2.31534	5.51335e-12	0.572584	0.537476	1.03759	0.0171643	0.465005	0.395782
ENSMUSG00000008307.11	1700109H08Rik	3062	2.3165	1.5902	1.47358	1.15181	-0.545785	0.111034	-0.669493	0.0413359	-1.01612	0.000998662	-0.123709	0.888424	-0.470331	0.177307	-0.346622	0.426864
ENSMUSG00000040302.17	Rbm48	3071	3.6099	1.70063	1.98165	2.34303	-1.09036	9.88533e-15	-0.870771	4.23741e-10	-0.624395	5.06577e-06	0.21959	0.484152	0.465966	0.00143383	0.246376	0.16238
ENSMUSG00000001467.5	Cyp51	4415	4.79345	17.6401	30.8503	47.4628	1.88206	4.61041e-05	2.68903	1.89162e-09	3.31047	5.32092e-14	0.806969	0.368581	1.42841	0.00194981	0.621439	0.308487
ENSMUSG00000044674.6	Fzd1	4197	11.7527	79.9811	48.415	21.4191	2.76773	4.9574e-33	2.04337	2.45385e-18	0.866619	0.000381762	-0.724353	0.0424275	-1.90111	3.5968e-18	-1.17676	5.12693e-07
ENSMUSG00000028926.15	Cdk14	18877	1.39028	3.52584	3.39425	2.82303	1.34403	0.000944647	1.28922	0.00146499	1.0234	0.011706	-0.0548158	0.964568	-0.320637	0.519514	-0.265821	0.676851
ENSMUSG00000015653.13	Steap2	12144	1.05338	5.19434	4.23829	4.16324	2.30634	2.82217e-14	2.01274	3.85095e-11	1.98746	5.00697e-11	-0.293596	0.684845	-0.318878	0.392981	-0.0252822	0.969924
ENSMUSG00000015652.9	Steap1	1377	1.00649	5.10314	5.58016	4.5313	2.375	3.19543e-09	2.50691	2.88137e-10	2.20486	2.87387e-08	0.131903	0.899847	-0.170147	0.7315	-0.30205	0.589572
ENSMUSG00000012428.9	Steap4	3155	4.11535	27.6542	25.8506	27.1739	2.75257	1.96062e-05	2.65534	3.69882e-05	2.72742	1.6595e-05	-0.0972284	0.961025	-0.0251527	0.982277	0.0720757	0.957522
ENSMUSG00000003161.15	Sri	4852	7.91834	15.1304	13.6661	16.4486	0.935576	1.53002e-05	0.789	0.000307218	1.05623	5.42637e-07	-0.146575	0.790494	0.120658	0.67019	0.267233	0.362766
ENSMUSG00000002297.16	Dbf4	8728	0.865272	2.61005	3.53557	4.16081	1.59672	6.82393e-08	2.03737	2.10835e-12	2.27111	2.2665e-15	0.440644	0.460077	0.674392	0.0278577	0.233748	0.600026
ENSMUSG00000028970.9	Abcb1b	7990	0.349378	4.55312	2.60968	0.485751	3.72477	3.55116e-08	2.91971	2.06577e-05	0.481814	0.549271	-0.805059	0.587432	-3.24295	5.16896e-07	-2.43789	0.000439876
ENSMUSG00000079659.5	Tmem243	6841	2.3133	1.05561	1.00869	4.0626	-1.13562	0.00251062	-1.20434	0.00116117	0.81457	0.0287346	-0.068715	0.951723	1.95019	8.51535e-09	2.01891	3.10477e-09
ENSMUSG00000040254.11	Sema3d	8595	0.257136	1.63803	2.04135	0.882024	2.69554	2.38804e-10	3.01262	8.00781e-13	1.7995	3.02078e-05	0.317089	0.756077	-0.896037	0.041837	-1.21313	0.00585051
ENSMUSG00000028883.17	Sema3a	13868	0.10193	3.87731	3.42214	6.21572	5.29531	2.86862e-07	5.11519	6.82674e-07	5.97662	3.26908e-09	-0.180115	0.955272	0.681306	0.608292	0.861421	0.581818
ENSMUSG00000063531.7	Sema3e	9285	0.180405	0.16641	0.331465	4.07583	-0.120305	0.900931	0.902829	0.226227	4.53534	3.97173e-13	1.02313	0.435608	4.65565	1.42105e-15	3.63252	1.18003e-09
ENSMUSG00000040118.15	Cacna2d1	12416	4.79668	3.85522	3.61451	1.90151	-0.315683	0.302385	-0.409845	0.155385	-1.33599	1.26994e-07	-0.0941619	0.899088	-1.02031	5.75609e-05	-0.926143	0.000489414
ENSMUSG00000028864.7	Hgf	7186	1.05295	8.04334	3.55023	2.2622	2.94001	1.00305e-07	1.7584	0.00222372	1.10765	0.0599945	-1.18161	0.235369	-1.83236	0.000987218	-0.650746	0.401954
ENSMUSG00000028780.13	Sema3c	7140	15.6074	7.90241	6.6569	21.9907	-0.982283	4.03665e-05	-1.22985	1.53198e-07	0.495059	0.045929	-0.247565	0.651189	1.47734	1.68573e-11	1.72491	2.01372e-15
ENSMUSG00000002944.15	Cd36	3590	4.54071	5.50497	2.39164	61.2522	0.278707	0.808143	-0.930444	0.334067	3.7573	3.51367e-06	-1.20915	0.486354	3.47859	1.33156e-05	4.68774	1.79674e-09
ENSMUSG00000028771.13	Ptpn12	3509	7.34567	20.2244	22.223	33.8702	1.46273	2.74095e-13	1.59928	7.96189e-16	2.20729	1.00549e-29	0.136541	0.794958	0.744555	0.000191482	0.608014	0.00472615
ENSMUSG00000039934.12	Gsap	10425	0.511636	3.58179	2.41577	5.08053	2.81841	4.25167e-13	2.24903	1.02848e-08	3.32334	3.64253e-18	-0.569381	0.48756	0.504927	0.265634	1.07431	0.0113254
ENSMUSG00000039883.5	Lrrc17	3608	1.04126	5.55684	2.67409	0.250419	2.42891	0.00116016	1.37138	0.0841875	-2.11005	0.00530729	-1.05753	0.484402	-4.53897	3.24365e-11	-3.48143	1.28946e-06
ENSMUSG00000029014.14	Dnajc2	5029	4.60831	6.71096	8.34045	9.45532	0.543315	7.37516e-05	0.859802	5.94782e-11	1.03901	7.78153e-16	0.316487	0.141727	0.495693	0.000103691	0.179206	0.298641
ENSMUSG00000042453.14	Reln	23738	1.02134	0.709821	0.907042	5.91951	-0.526086	0.656605	-0.171858	0.891673	2.53711	0.00569044	0.354228	0.892037	3.0632	0.000667455	2.70897	0.00474524
ENSMUSG00000028995.14	Fam126a	10117	1.69825	5.67641	7.25829	13.5318	1.74344	0.000158771	2.09864	3.39351e-06	2.99735	7.85612e-12	0.355202	0.75349	1.25391	0.00702948	0.898705	0.095074
ENSMUSG00000038319.14	Kcnh2	4845	6.34708	1.16919	0.65692	0.475668	-2.44894	9.43481e-09	-3.29523	5.94175e-15	-3.76117	3.32728e-19	-0.846286	0.31987	-1.31223	0.00396639	-0.465942	0.475848
ENSMUSG00000028978.12	Nos3	4132	1.11919	4.37041	3.41658	4.46436	1.97468	2.21625e-05	1.6195	0.00060378	2.0064	1.09585e-05	-0.355178	0.754017	0.0317232	0.965145	0.386902	0.575596
ENSMUSG00000038295.14	Atg9b	3946	0.0973649	1.8591	1.46903	3.30723	4.41017	1.14039e-06	4.06939	7.44462e-06	5.24435	2.82012e-09	-0.340784	0.887329	0.83418	0.407839	1.17496	0.283006
ENSMUSG00000028958.15	Tmub1	1895	6.03909	3.2743	3.49041	2.95631	-0.885222	1.86874e-05	-0.791223	0.000132189	-1.03327	2.70369e-07	0.0939984	0.871117	-0.148049	0.582093	-0.242047	0.40507
ENSMUSG00000038181.16	Chpf2	5588	15.1681	15.011	12.4715	5.89909	-0.0153622	0.944297	-0.282387	0.0745873	-1.36353	1.5903e-22	-0.267024	0.347035	-1.34817	5.72606e-25	-1.08114	6.85035e-16
ENSMUSG00000028949.13	Smarcd3	5120	6.60753	1.92632	1.44608	0.648352	-1.78352	8.01492e-10	-2.20022	1.86796e-14	-3.36099	9.97258e-32	-0.416699	0.516584	-1.57747	6.10603e-08	-1.16077	0.000220062
ENSMUSG00000028944.14	Prkag2	6480	8.06094	4.242	4.27382	3.46425	-0.926941	1.24005e-05	-0.918859	1.35935e-05	-1.21941	2.89171e-09	0.00808234	0.992849	-0.292465	0.233367	-0.300547	0.285538
ENSMUSG00000038056.15	Kmt2c	20291	20.2163	12.0645	7.73453	7.32084	-0.744847	0.0495777	-1.38672	7.25476e-05	-1.46568	1.93169e-05	-0.641871	0.345206	-0.720837	0.0544519	-0.0789652	0.908148
ENSMUSG00000056367.14	Actr3b	2425	1.07242	1.18757	0.578449	0.244242	0.144024	0.832701	-0.906232	0.0945264	-2.22503	1.24754e-05	-1.05026	0.227673	-2.36905	1.56549e-06	-1.31879	0.0244273
ENSMUSG00000061576.15	Dpp6	12347	4.03536	0.991923	0.462341	0.0248697	-2.02708	3.64634e-13	-3.13701	9.51671e-30	-7.57821	2.41275e-88	-1.10993	0.00505747	-5.55114	7.05562e-50	-4.4412	4.18585e-31
ENSMUSG00000002633.4	Shh	2847	1.50887	0.451262	0.184764	1.21485	-1.77514	0.179188	-3.15981	0.00953561	-0.315777	0.826393	-1.38467	0.594173	1.45936	0.279225	2.84404	0.0306697
ENSMUSG00000025747.12	Tyms	6089	1.5256	3.98459	5.49386	5.75785	1.3892	2.27476e-06	1.85523	9.45581e-11	1.92193	1.26512e-11	0.466035	0.419807	0.532732	0.0911089	0.0666972	0.904901
ENSMUSG00000049265.7	Kcnk3	3976	17.013	2.99478	1.80585	2.19577	-2.51047	0.00338398	-3.24671	9.06137e-05	-2.95972	0.000321302	-0.736238	0.709885	-0.449245	0.683014	0.286993	0.852961
ENSMUSG00000029175.17	Slc35f6	8495	2.95518	6.36009	5.43686	8.23293	1.10719	0.00442417	0.880526	0.0261244	1.4794	6.08561e-05	-0.22666	0.817391	0.372216	0.410179	0.598875	0.20237
ENSMUSG00000029177.9	Cenpa	5860	1.06477	4.76394	6.23875	5.37378	2.16925	7.11637e-12	2.56037	2.42032e-16	2.34376	5.49719e-14	0.391118	0.566564	0.174513	0.675491	-0.216605	0.667354
ENSMUSG00000038828.13	Tmem214	7580	19.0418	10.1406	10.0869	7.7698	-0.909788	1.11126e-10	-0.91652	6.60479e-11	-1.29394	5.64297e-21	-0.0067319	0.990177	-0.384154	0.010457	-0.377422	0.0184483
ENSMUSG00000029163.9	Emilin1	4937	8.90497	48.3533	28.6876	11.1284	2.44204	1.90424e-07	1.68866	0.000451263	0.321977	0.561477	-0.753378	0.428982	-2.12006	3.19434e-06	-1.36668	0.00730326
ENSMUSG00000029162.15	Khk	1797	7.54471	2.72962	2.23311	2.11999	-1.47366	2.84083e-11	-1.77982	8.41217e-16	-1.84206	3.57502e-17	-0.306152	0.549412	-0.368399	0.167239	-0.0622466	0.893462
ENSMUSG00000045302.13	Preb	7209	21.4709	9.55529	9.35921	9.16989	-1.16862	4.3854e-24	-1.19896	2.29668e-25	-1.22859	7.40994e-27	-0.0303386	0.933657	-0.0599703	0.71381	-0.0296317	0.899753
ENSMUSG00000006641.12	Slc5a6	3991	3.42407	1.91315	1.57682	1.707	-0.840705	3.78579e-05	-1.124	2.07763e-08	-1.0101	3.31572e-07	-0.283292	0.520515	-0.169398	0.51033	0.113894	0.745418
ENSMUSG00000029147.11	Ppm1g	4861	13.6623	18.7658	24.5704	29.0853	0.458162	0.0421068	0.847704	4.58171e-05	1.09049	6.54647e-08	0.389542	0.327965	0.632329	0.00249534	0.242787	0.399328
ENSMUSG00000038564.11	Ift172	6617	10.305	5.34946	5.55735	4.92484	-0.946575	4.66127e-12	-0.892801	6.4133e-11	-1.0647	2.65896e-15	0.0537746	0.894585	-0.118128	0.5062	-0.171902	0.378169
ENSMUSG00000038552.14	Fndc4	3039	1.06031	3.03569	4.11755	1.44632	1.52896	0.00459517	1.97236	0.000150184	0.454732	0.441707	0.443393	0.713467	-1.07423	0.0486922	-1.51762	0.00492788
ENSMUSG00000029135.10	Fosl2	9680	6.39861	50.4212	54.7572	83.6361	2.9792	7.85682e-24	3.09829	9.00127e-26	3.70935	7.25231e-37	0.119091	0.894295	0.730149	0.0250119	0.611057	0.0969686
ENSMUSG00000014932.15	Yes1	7508	5.50822	6.32454	7.66177	12.0228	0.199691	0.555815	0.477182	0.102639	1.1268	1.72027e-05	0.27749	0.647054	0.927107	0.000434367	0.649617	0.028685
ENSMUSG00000037426.18	Depdc5	11774	9.62306	5.894	5.14879	3.61292	-0.70745	0.00947764	-0.903562	0.0005936	-1.41427	1.88025e-08	-0.196112	0.764548	-0.706816	0.00811185	-0.510704	0.098476
ENSMUSG00000018965.11	Ywhah	3709	17.0807	38.0978	43.4946	47.2396	1.15822	3.60217e-15	1.34977	1.96359e-20	1.46848	3.02052e-24	0.191556	0.556676	0.310261	0.0555848	0.118705	0.610519
ENSMUSG00000011034.6	Slc5a1	4104	14.3713	3.81488	2.32241	1.57015	-1.91627	0.0303477	-2.63692	0.00175374	-3.20336	8.59775e-05	-0.720654	0.7154	-1.28709	0.166789	-0.566436	0.669703
ENSMUSG00000037379.7	Spon2	2947	4.90526	11.0863	4.38946	1.85534	1.17866	0.330185	-0.162204	0.910149	-1.40963	0.20267	-1.34087	0.537729	-2.5883	0.0143823	-1.24743	0.373559
ENSMUSG00000037355.14	Uvssa	8666	5.48263	4.32482	3.48883	2.64984	-0.342697	0.116817	-0.654474	0.00100759	-1.05152	3.09268e-08	-0.311776	0.42686	-0.708825	0.000237307	-0.397049	0.0858655
ENSMUSG00000004642.13	Slbp	6076	3.17505	5.62766	7.0622	8.08139	0.827118	0.000326625	1.15688	1.94585e-07	1.35037	5.82867e-10	0.329764	0.476227	0.523255	0.0251543	0.193492	0.561963
ENSMUSG00000037313.16	Tacc3	3552	1.76403	8.5537	11.4998	11.5886	2.28618	9.02864e-12	2.71507	2.21852e-16	2.72543	1.16515e-16	0.428887	0.55027	0.439246	0.257053	0.0103583	0.989458
ENSMUSG00000054252.18	Fgfr3	7158	4.06796	0.909062	1.42907	5.31172	-2.17007	5.3085e-05	-1.51273	0.00608679	0.38551	0.531233	0.657339	0.573883	2.55558	4.78657e-07	1.89825	0.00047817
ENSMUSG00000057406.16	Nsd2	16803	4.27561	7.83538	9.74614	8.8854	0.874171	7.50692e-07	1.1896	5.10161e-12	1.05602	8.48786e-10	0.315434	0.36231	0.181848	0.396001	-0.133585	0.629769
ENSMUSG00000079555.2	Haus3	3871	1.78187	3.32344	4.22683	4.25268	0.904494	0.000118448	1.25614	3.05253e-08	1.2616	1.83652e-08	0.351643	0.428487	0.357102	0.148074	0.00545962	0.992015
ENSMUSG00000037235.13	Mxd4	8483	27.2275	13.8534	12.1972	11.5192	-0.974871	1.06407e-14	-1.15941	1.60503e-20	-1.24163	1.31033e-23	-0.184544	0.504626	-0.266759	0.059004	-0.0822153	0.704322
ENSMUSG00000054520.15	Sh3bp2	4296	3.853	9.16611	9.52484	9.85525	1.25335	2.07851e-06	1.30834	5.96525e-07	1.35799	1.48691e-07	0.0549947	0.945556	0.104644	0.770874	0.0496493	0.924701
ENSMUSG00000052783.16	Grk4	4829	1.3705	0.684728	0.613184	0.536503	-1.0093	0.000721198	-1.18994	5.17316e-05	-1.36683	1.93164e-06	-0.180646	0.819074	-0.357538	0.30893	-0.176892	0.724189
ENSMUSG00000029101.16	Rgs12	8487	3.64709	6.01151	6.83911	11.0504	0.721784	0.0153488	0.908702	0.00152763	1.60041	3.52704e-09	0.186918	0.795409	0.878627	0.00171645	0.691709	0.0258626
ENSMUSG00000029102.9	Hgfac	3410	0.639959	3.91884	2.40717	3.26853	2.6391	0.000820069	1.93251	0.0171553	2.37611	0.00221843	-0.706587	0.692342	-0.262984	0.803665	0.443603	0.72599
ENSMUSG00000044716.12	Dok7	4275	0.323449	0.824875	1.0196	1.14597	1.38078	0.0769357	1.69143	0.0235248	1.86114	0.00979457	0.310653	0.870854	0.480355	0.586556	0.169702	0.897769
ENSMUSG00000036596.6	Cpz	2245	0.211801	6.17416	3.29809	0.354892	5.00121	5.91526e-17	4.09223	1.19514e-11	0.81707	0.24677	-0.908981	0.375355	-4.18414	3.86058e-17	-3.27516	2.2333e-10
ENSMUSG00000029096.15	Htra3	4439	3.53142	7.82991	6.22507	1.86218	1.15113	0.00396453	0.818608	0.0469952	-0.926486	0.0201201	-0.332525	0.716265	-2.07762	8.30915e-09	-1.74509	3.35058e-06
ENSMUSG00000036553.16	Sh3tc1	5735	2.65512	3.27443	2.102	4.59517	0.303709	0.518594	-0.339545	0.449144	0.793501	0.0415717	-0.643254	0.384167	0.489792	0.255623	1.13305	0.00408666
ENSMUSG00000029095.17	Ablim2	7047	2.4491	0.201358	0.110818	0.210863	-3.64105	4.83272e-17	-4.56342	1.59533e-24	-3.5714	6.90389e-17	-0.922368	0.336429	0.0696474	0.922465	0.992015	0.0877132
ENSMUSG00000029093.14	Sorcs2	8802	3.14089	17.2205	14.8665	10.6931	2.45675	4.30518e-36	2.24452	3.21089e-30	1.76893	3.43531e-19	-0.212232	0.647414	-0.687821	0.000703583	-0.475589	0.0395312
ENSMUSG00000043430.5	Psapl1	2548	0.116511	7.13801	2.92767	18.4113	6.16934	9.12134e-07	4.87813	0.000130416	7.53821	7.28522e-10	-1.29121	0.627584	1.36887	0.330001	2.66008	0.0503063
ENSMUSG00000029196.9	Tada2b	3791	15.2271	6.76589	6.65289	8.22998	-1.1714	2.9553e-33	-1.19289	1.81746e-34	-0.889239	3.64322e-20	-0.0214912	0.94725	0.282163	0.00812273	0.303654	0.00615154
ENSMUSG00000029119.9	Man2b2	3528	11.7982	25.6034	21.3713	17.127	1.11886	1.92369e-08	0.857881	2.24138e-05	0.538147	0.00940958	-0.26098	0.545474	-0.580714	0.00464971	-0.319734	0.210423
ENSMUSG00000029120.10	Ppp2r2c	4450	1.1351	0.0723115	0.0733106	0.129206	-4.17072	3.40049e-10	-4.15124	3.11247e-10	-3.23152	2.38036e-07	0.019484	0.995373	0.939203	0.261013	0.919719	0.345901
ENSMUSG00000039474.13	Wfs1	3787	14.9306	7.41945	7.15072	11.0712	-1.00981	0.00238335	-1.06292	0.00119739	-0.43249	0.216054	-0.0531134	0.957911	0.57732	0.102873	0.630434	0.100051
ENSMUSG00000113373.1	Jakmip1	138	0.312682	2.90864	1.4709	1.4977	4.9893	0.00529473	3.79843	0.041232	3.86223	0.0316847	-1.19086	NA	-1.12707	0.445116	0.0637955	0.982424
ENSMUSG00000029121.16	Crmp1	7046	0.26605	1.11898	0.437421	0.131893	2.10026	0.000196882	0.731409	0.254573	-1.03939	0.0883868	-1.36886	0.114671	-3.13966	1.69898e-09	-1.7708	0.00277567
ENSMUSG00000062329.4	Cytl1	1056	1.0361	0.0786708	0.0502938	0.675929	-4.69482	0.000232944	-6.41844	1.38619e-05	-0.649173	0.575691	-1.72362	0.673986	4.04564	0.00195623	5.76927	0.000240966
ENSMUSG00000048450.10	Msx1	3097	2.64932	3.584	2.35627	0.489333	0.436605	0.431012	-0.169286	0.778988	-2.46712	5.52319e-08	-0.605891	0.529269	-2.90372	1.49037e-11	-2.29783	3.32281e-07
ENSMUSG00000029126.7	Nsg1	3215	1.68578	9.06709	5.66383	3.61333	2.43646	0.00225119	1.75682	0.0326099	1.10641	0.186098	-0.679643	0.711137	-1.33004	0.117992	-0.650402	0.577301
ENSMUSG00000051596.13	Otop1	3442	0.0370009	2.19597	2.49964	0.682124	6.50394	9.06684e-09	6.69199	2.65222e-09	4.80329	2.4829e-05	0.188056	0.941853	-1.70064	0.0641903	-1.8887	0.053068
ENSMUSG00000005107.13	Slc2a9	5083	0.491994	0.836791	0.471247	1.18762	0.777772	0.132391	-0.0665349	0.919066	1.28291	0.00562369	-0.844307	0.331886	0.505136	0.335645	1.34944	0.00450645
ENSMUSG00000005103.12	Wdr1	8899	20.455	46.4374	46.7564	49.9105	1.18307	7.39275e-10	1.19303	4.34935e-10	1.28707	9.8216e-12	0.00996482	0.988487	0.104	0.690692	0.0940354	0.785063
ENSMUSG00000046572.10	Zfp518b	6882	0.989091	3.91267	4.40065	3.8755	1.99088	3.65604e-12	2.16221	2.67032e-14	1.97777	2.9057e-12	0.171339	0.819074	-0.0131054	0.977944	-0.184444	0.690543
ENSMUSG00000051022.7	Hs3st1	2230	2.11576	14.4131	7.83194	8.92379	2.77873	9.30936e-11	1.89795	1.55675e-05	2.08646	1.26096e-06	-0.880772	0.262708	-0.692267	0.150576	0.188504	0.806424
ENSMUSG00000061535.11	C1qtnf7	4162	1.83726	7.93581	3.49041	1.82211	2.11705	0.0114693	0.928163	0.312155	-0.0116877	0.993323	-1.18889	0.465094	-2.12874	0.0090456	-0.939851	0.393786
ENSMUSG00000039753.16	Fbxl5	9740	9.24323	10.3742	12.1397	19.4071	0.166514	0.464386	0.394083	0.0457498	1.07043	1.70954e-09	0.227569	0.56812	0.903919	1.92428e-07	0.67635	0.000274712
ENSMUSG00000029082.17	Bst1	3317	0.12556	2.55608	1.78208	6.26199	4.50513	1.35237e-10	3.97861	1.64427e-08	5.80232	2.50424e-17	-0.526513	0.725182	1.29719	0.0501314	1.82371	0.00576037
ENSMUSG00000029084.5	Cd38	3890	3.5631	9.62713	7.63604	5.75551	1.43658	0.00034544	1.10053	0.00725439	0.69372	0.0980737	-0.336049	0.721896	-0.742862	0.0823931	-0.406812	0.472574
ENSMUSG00000048373.8	Fgfbp1	2263	36.0155	2.68999	4.03897	12.2932	-3.75328	0.000227761	-3.16247	0.00209613	-1.55251	0.149339	0.590815	0.825997	2.20077	0.0397333	1.60995	0.205303
ENSMUSG00000039706.11	Ldb2	3336	2.99466	3.65553	2.01061	7.98606	0.288451	0.651163	-0.577484	0.307932	1.41953	0.00397765	-0.865934	0.365502	1.13108	0.0266749	1.99702	3.6718e-05
ENSMUSG00000015880.13	Ncapg	7066	0.416563	2.77742	4.10146	4.22708	2.7539	4.52842e-13	3.31903	9.3606e-19	3.36179	2.1369e-19	0.565127	0.456153	0.607888	0.143276	0.0427617	0.956647
ENSMUSG00000031558.15	Slit2	25433	1.16951	3.23634	3.05275	1.85897	1.46986	0.00404738	1.38563	0.00654923	0.669623	0.210877	-0.0842267	0.956088	-0.800234	0.145129	-0.716007	0.263773
ENSMUSG00000072941.5	Sod3	3738	6.44914	15.3571	9.95876	20.0831	1.25323	0.0661088	0.627621	0.39044	1.64067	0.0096359	-0.625609	0.662224	0.387439	0.631248	1.01305	0.193788
ENSMUSG00000045790.10	Ccdc149	3328	8.75609	3.19047	3.15595	1.91222	-1.45942	9.75559e-09	-1.47738	5.39527e-09	-2.20029	1.03354e-18	-0.0179667	0.98366	-0.74087	0.00632313	-0.722903	0.01213
ENSMUSG00000039252.11	Lgi2	6528	0.742989	10.0032	7.36566	1.06876	3.76293	1.92369e-08	3.32054	8.01496e-07	0.529115	0.502278	-0.44239	0.800057	-3.23382	5.16896e-07	-2.79143	3.37474e-05
ENSMUSG00000029186.12	Pi4k2b	3760	10.6369	14.3613	16.0861	24.568	0.433472	0.0251661	0.598692	0.00115125	1.20862	2.8103e-12	0.16522	0.694469	0.775145	6.22529e-06	0.609925	0.000874537
ENSMUSG00000029188.14	Slc34a2	5013	0.64179	3.23859	2.42301	115.119	2.35067	0.00166925	1.93005	0.0109092	7.50575	6.76106e-28	-0.420622	0.826314	5.15508	1.91268e-15	5.5757	8.46413e-18
ENSMUSG00000029189.10	Sel1l3	9850	23.8985	15.0632	10.3812	6.07008	-0.666028	0.512754	-1.20341	0.185712	-1.97791	0.0176952	-0.537384	0.798373	-1.31189	0.148939	-0.774501	0.516951
ENSMUSG00000029193.7	Cckar	3682	0.25922	0.0367638	0.0206994	2.74546	-3.30365	0.0332735	-4.6499	0.0043337	3.4646	0.0115538	-1.34625	0.749275	6.76825	7.88591e-07	8.11449	1.14685e-07
ENSMUSG00000039156.19	Stim2	5133	5.79042	12.8591	14.7581	20.7353	1.15228	1.01953e-05	1.35191	1.39818e-07	1.84209	1.78303e-13	0.199624	0.756897	0.689804	0.00975799	0.49018	0.115779
ENSMUSG00000029108.14	Pcdh7	10604	10.2945	10.5068	7.33893	4.51226	0.0294474	0.976411	-0.488572	0.480321	-1.19106	0.0470123	-0.51802	0.703575	-1.22051	0.0471196	-0.702486	0.374426
ENSMUSG00000037999.13	Arap2	12451	2.87277	4.18967	4.75138	9.20949	0.54505	0.0542607	0.726984	0.00690047	1.68172	1.45999e-11	0.181934	0.782235	1.13667	4.29346e-06	0.954737	0.000254888
ENSMUSG00000060512.7	0610040J01Rik	2403	7.45431	16.4579	17.6184	11.2051	1.14464	0.064439	1.2427	0.0391282	0.589578	0.349336	0.0980555	0.955659	-0.555062	0.418662	-0.653118	0.406525
ENSMUSG00000047881.14	Rell1	3856	9.27762	17.615	18.1819	19.4806	0.926167	9.59985e-08	0.972671	1.64791e-08	1.07162	2.78037e-10	0.0465045	0.928785	0.145454	0.503305	0.0989497	0.734435
ENSMUSG00000029171.12	Pgm2	2590	4.56834	14.4562	14.1761	15.5811	1.66578	1.06587e-27	1.64	6.44607e-27	1.77447	8.84268e-32	-0.0257794	0.956088	0.10869	0.570044	0.134469	0.546376
ENSMUSG00000029178.14	Klf3	11243	10.8358	17.5664	19.9517	24.1361	0.697382	0.000146327	0.881189	8.6599e-07	1.15567	3.6676e-11	0.183807	0.658831	0.458283	0.0147233	0.274476	0.238651
ENSMUSG00000044827.10	Tlr1	3346	0.312482	3.35401	2.83004	1.31896	3.47964	3.17622e-13	3.23003	1.40395e-11	2.1253	1.31628e-05	-0.249613	0.833744	-1.35434	0.00267214	-1.10473	0.0266401
ENSMUSG00000051498.7	Tlr6	3727	0.221123	1.65706	1.25489	1.66551	2.97529	3.22222e-11	2.56995	1.29191e-08	2.9849	1.57578e-11	-0.40534	0.652641	0.00960841	0.990081	0.414949	0.460377
ENSMUSG00000029185.14	Fam114a1	2976	12.1064	29.5753	26.9528	12.8182	1.28943	9.78982e-09	1.15593	3.02337e-07	0.082223	0.772344	-0.133499	0.825586	-1.20721	1.72284e-08	-1.07371	1.16577e-06
ENSMUSG00000037913.12	Tmem156	3309	0.0497988	0.623686	0.289956	1.10917	4.04474	1.45491e-05	2.90078	0.00267968	4.89063	6.04117e-08	-1.14395	0.415171	0.84589	0.286088	1.98984	0.00729696
ENSMUSG00000054920.12	Klhl5	7057	3.06734	6.86982	5.11303	11.6772	1.16494	0.00155208	0.737969	0.0554092	1.93085	2.56406e-08	-0.426967	0.585467	0.765916	0.0433041	1.19288	0.00116017
ENSMUSG00000029201.14	Ugdh	6752	2.94187	12.0158	8.6969	6.99278	2.03225	3.92951e-10	1.56584	1.97438e-06	1.25083	0.000152847	-0.46641	0.501013	-0.781417	0.0242995	-0.315007	0.517289
ENSMUSG00000037822.12	Smim14	15976	17.4104	8.39329	5.56279	5.44022	-1.05282	0.00142155	-1.64688	1.82322e-07	-1.67882	7.44625e-08	-0.594064	0.343055	-0.626006	0.0729327	-0.0319411	0.96245
ENSMUSG00000054598.13	9130230L23Rik	7830	1.68677	0.315492	0.171822	0.389047	-2.43929	0.0010131	-3.35579	3.51077e-06	-2.13328	0.00346182	-0.916496	0.567783	0.306004	0.759296	1.2225	0.184143
ENSMUSG00000070780.11	Rbm47	7163	40.1736	17.5555	18.7094	31.7184	-1.19455	1.36307e-05	-1.10264	6.12348e-05	-0.341056	0.257297	0.0919083	0.907814	0.85349	0.00206556	0.761581	0.0104519
ENSMUSG00000029207.16	Apbb2	10966	5.06882	13.0775	16.2202	17.8952	1.36801	0.000573284	1.67902	1.46861e-05	1.82063	1.70236e-06	0.311011	0.746912	0.452614	0.324639	0.141603	0.844752
ENSMUSG00000029223.12	Uchl1	1632	6.93669	5.44115	6.51064	0.84163	-0.353276	0.351304	-0.0917868	0.830842	-3.07998	8.34768e-22	0.261489	0.732946	-2.72671	5.18517e-19	-2.9882	1.06089e-22
ENSMUSG00000037736.20	Limch1	11703	12.718	3.69243	4.58153	16.4583	-1.78522	0.0105942	-1.47362	0.0371343	0.372059	0.635735	0.311601	0.864594	2.15728	0.00115319	1.84568	0.0100509
ENSMUSG00000037685.15	Atp8a1	14278	9.03337	5.40145	4.54509	10.0039	-0.742192	0.175309	-0.991684	0.0546085	0.147345	0.805609	-0.249491	0.849071	0.889537	0.0903195	1.13903	0.0355526
ENSMUSG00000067219.9	Nipal1	4393	0.463445	4.87786	4.20918	9.97059	3.42658	8.27602e-12	3.21436	1.43824e-10	4.4594	9.81771e-20	-0.212218	0.879825	1.03282	0.0499319	1.24503	0.0224711
ENSMUSG00000029217.16	Tec	3744	3.0142	5.58834	5.56845	7.67674	0.894128	0.00182758	0.888645	0.00180494	1.35223	5.85764e-07	-0.00548356	0.99644	0.458099	0.130889	0.463583	0.170882
ENSMUSG00000029219.10	Slc10a4	2106	2.56354	0.0489321	0.0361895	0.0204891	-6.4456	1.27669e-18	-7.08843	1.67055e-16	-9.66298	1.75202e-17	-0.642827	0.840248	-3.21738	0.0371254	-2.57455	0.179598
ENSMUSG00000029154.13	Cwh43	2915	65.374	3.48371	1.98842	2.28873	-4.23589	1.77696e-08	-5.04929	1.0319e-11	-4.84555	5.16793e-11	-0.813409	0.64237	-0.609667	0.531012	0.203742	0.891337
ENSMUSG00000029156.11	Sgcb	4052	2.97596	6.05987	4.97483	2.94077	1.02808	0.0156288	0.743402	0.0891588	-0.0168959	0.977299	-0.284678	0.778086	-1.04498	0.0112101	-0.760298	0.113052
ENSMUSG00000029155.16	Spata18	2107	0.0494446	0.129661	0.191503	2.4994	1.89774	0.339081	2.56295	0.164141	6.41464	6.95525e-05	0.665217	0.86572	4.5169	0.00126563	3.85169	0.00985352
ENSMUSG00000049907.8	Rasl11b	2161	14.286	6.23627	4.56025	2.88421	-1.19853	0.0298605	-1.65321	0.00166448	-2.31511	4.51458e-06	-0.45468	0.712414	-1.11658	0.0427735	-0.661897	0.346712
ENSMUSG00000029231.15	Pdgfra	10024	7.79842	37.4668	18.8229	11.5375	2.26498	0.000439171	1.27168	0.0624975	0.565382	0.430587	-0.993296	0.436587	-1.6996	0.00908972	-0.7063	0.429249
ENSMUSG00000005672.12	Kit	8911	8.02189	4.94136	24.7931	26.407	-0.699603	0.44555	1.62861	0.0411937	1.71953	0.0258513	2.32822	0.0285504	2.41914	0.00121969	0.0909216	0.954116
ENSMUSG00000062960.10	Kdr	9030	2.35304	8.91509	7.74367	13.8727	1.9239	3.03493e-05	1.72055	0.00020748	2.56219	8.80635e-09	-0.203347	0.874224	0.638289	0.224592	0.841636	0.130584
ENSMUSG00000059325.14	Hopx	1516	11.1817	5.03647	2.21912	44.0101	-1.15493	0.0767789	-2.35219	8.12899e-05	1.97952	0.000784347	-1.19726	0.279659	3.13445	1.55099e-08	4.33171	1.30992e-15
ENSMUSG00000036256.13	Igfbp7	1209	78.362	407.173	288.073	150.58	2.37806	1.21397e-19	1.87869	1.27775e-12	0.942796	0.000580946	-0.499376	0.348571	-1.43527	2.43548e-08	-0.935889	0.000884032
ENSMUSG00000037605.16	Adgrl3	17750	1.27183	0.245612	1.27578	2.1955	-2.38483	0.00257648	0.00506246	0.998552	0.788849	0.354072	2.3899	0.0285504	3.17368	1.83009e-05	0.783787	0.476436
ENSMUSG00000029254.16	Stap1	6215	3.44017	0.522903	0.295942	0.404701	-2.7323	4.31518e-05	-3.57889	5.00223e-08	-3.10831	1.80176e-06	-0.846591	0.563325	-0.376009	0.672668	0.470582	0.665829
ENSMUSG00000035898.13	Uba6	8159	3.78637	5.63111	6.69184	9.20485	0.572973	0.102425	0.822625	0.0123466	1.28238	3.50118e-05	0.249652	0.747183	0.70941	0.0322424	0.459758	0.258751
ENSMUSG00000061259.11	Tmprss11d	2796	0.132552	1.49415	3.5953	12.2618	3.66291	0.135242	4.93901	0.0327256	6.71322	0.00216519	1.2761	0.821795	3.05031	0.211918	1.77421	0.586229
ENSMUSG00000079451.9	Tmprss11g	5015	0.056489	3.70027	2.90199	25.8046	6.27769	0.00100588	5.92639	0.00186811	9.08259	5.63058e-07	-0.351292	0.949268	2.8049	0.167887	3.15619	0.156143
ENSMUSG00000048764.16	Tmprss11f	6807	0.00954624	0.0617806	0.0985083	1.16553	4.09104	0.0929964	4.83186	0.0384786	8.48222	8.22573e-05	0.740815	0.885284	4.39118	0.017763	3.65037	0.0780607
ENSMUSG00000035861.6	Tmprss11b	4171	0.188302	7.03352	7.87128	69.9768	5.30465	0.0237364	5.46731	0.0177477	8.62116	6.99095e-05	0.16266	0.982202	3.31651	0.178432	3.15385	0.269231
ENSMUSG00000054537.8	Tmprss11e	3416	0.0884092	3.3968	4.25622	46.3765	5.49464	2.83513e-05	5.82142	7.61363e-06	9.2708	1.41062e-13	0.326775	0.929731	3.77615	0.00239489	3.44938	0.00944964
ENSMUSG00000029260.15	Ugt2b34	4312	0.329272	4.97405	3.75658	8.50068	3.959	0.00274855	3.55319	0.00736765	4.7333	0.000189197	-0.405805	0.910636	0.774304	0.639251	1.18011	0.528824
ENSMUSG00000029272.8	Sult1e1	1242	6.43487	1.66414	0.255557	0.0347425	-1.9735	0.0620333	-4.89586	8.33215e-07	-10.2335	4.44858e-13	-2.92236	0.0575444	-8.25998	1.28339e-08	-5.33762	0.00104054
ENSMUSG00000070702.9	Csn1s1	6247	0.171156	0.00854949	7.43332	2.27411	-6.36019	0.100738	5.49944	0.130426	3.78766	0.298218	11.8596	0.0132369	10.1479	0.00451062	-1.71178	0.762095
ENSMUSG00000009580.15	Odam	1376	11.4533	0.177763	155.745	166.785	-6.28354	0.00124995	3.76905	0.0605241	3.86786	0.0465427	10.0526	6.67706e-06	10.1514	1.29532e-08	0.0988149	0.981904
ENSMUSG00000001622.15	Csn3	4152	0.105036	0.0614921	30.3465	63.1223	-0.887933	0.776789	8.32818	0.00027898	9.38504	2.70562e-05	9.21611	0.00183255	10.273	2.36179e-06	1.05686	0.788981
ENSMUSG00000007457.3	2310003L06Rik	1603	0.203964	0.0874088	29.5875	15.7436	-1.55222	0.588479	7.38927	0.000831782	6.47784	0.00319116	8.94149	0.00183255	8.03006	0.000219895	-0.911433	0.811652
ENSMUSG00000100704.1	Gm28434	500	0.129962	0.131452	16.507	8.09575	-0.0660396	0.991099	8.54037	0.000371614	7.50428	0.00166156	8.60641	0.00551539	7.57032	0.0010943	-1.03609	0.762152
ENSMUSG00000007907.4	Cabs1	1505	0.086694	0.0361715	7.51526	3.83178	-2.78884	0.346122	7.02934	0.00187718	6.05197	0.00712875	9.81817	0.00183255	8.84081	0.000180326	-0.977367	0.788899
ENSMUSG00000029280.13	Smr3a	639	0.0675276	0.0675276	3.25186	1.40755	0	1	7.49076	0.00286886	6.24066	0.0128511	8.07163	0.0143394	6.82153	0.00559409	-1.2501	0.718325
ENSMUSG00000029282.3	Amtn	1022	0.0849436	0.0725343	1.26133	0.1942	-0.466406	0.894246	4.8673	0.0445587	1.86733	0.476745	5.33371	0.142665	2.33374	0.389911	-2.99997	0.253225
ENSMUSG00000067149.6	Jchain	2517	0.114497	1.39157	0.714823	1.65361	3.81941	0.00603925	2.83589	0.0472554	4.07106	0.00239915	-0.983519	0.753541	0.251647	0.892603	1.23517	0.500927
ENSMUSG00000029291.11	Rufy3	10214	5.33459	3.16297	2.77976	2.35252	-0.754641	0.0016029	-0.943977	5.01554e-05	-1.1833	1.72651e-07	-0.189335	0.740152	-0.428654	0.0933844	-0.239319	0.478312
ENSMUSG00000029366.10	Dck	3781	1.9522	7.23728	9.44477	10.2863	1.89862	2.35199e-11	2.28455	3.43365e-16	2.40729	4.64554e-18	0.385932	0.519832	0.508674	0.100279	0.122743	0.807123
ENSMUSG00000060961.16	Slc4a4	11333	0.588789	3.1827	2.34325	5.13282	2.44208	0.000940161	2.00003	0.00752409	3.13236	9.4367e-06	-0.442053	0.813637	0.690277	0.430723	1.13233	0.213825
ENSMUSG00000043635.12	Adamts3	5430	0.59789	6.06408	3.26602	1.11326	3.36013	3.29429e-05	2.46552	0.00296004	0.904379	0.313387	-0.894607	0.61264	-2.45575	0.00237407	-1.56115	0.102414
ENSMUSG00000029370.10	Rassf6	4260	0.724566	1.72328	1.26713	1.49856	1.2624	0.011158	0.811823	0.118874	1.06056	0.0299864	-0.450577	0.673651	-0.201838	0.74663	0.248739	0.750145
ENSMUSG00000029371.7	Cxcl5	1863	0.23409	46.1719	22.8078	70.5024	7.79062	1.436e-14	6.77252	2.74544e-11	8.40159	4.86434e-17	-1.01809	0.652641	0.610975	0.634456	1.62907	0.186747
ENSMUSG00000029372.7	Ppbp	1083	0.342213	6.66172	13.1136	106.49	4.45919	0.0284496	5.44091	0.00550807	8.46624	5.13707e-06	0.981719	0.84538	4.00705	0.0428533	3.02533	0.194374
ENSMUSG00000029373.7	Pf4	721	1.26661	18.4765	10.4141	5.88269	3.93497	3.72887e-08	3.10057	1.95369e-05	2.27412	0.00196769	-0.834398	0.580528	-1.66084	0.0217395	-0.826447	0.388691
ENSMUSG00000029379.10	Cxcl3	3498	0.0934689	2.45547	3.17091	25.2688	4.92186	0.00453229	5.29278	0.001894	8.29191	3.12623e-07	0.370924	0.939106	3.37005	0.0508768	2.99912	0.123852
ENSMUSG00000029375.6	Cxcl15	2127	0.345768	2.75519	1.53001	96.5842	3.07721	0.000273719	2.21879	0.0108827	8.21863	1.37301e-25	-0.858422	0.629983	5.14141	1.09955e-12	5.99983	6.25942e-17
ENSMUSG00000029380.11	Cxcl1	1875	0.170559	3.64421	2.63003	3.22344	4.64216	2.23128e-10	4.16817	1.36516e-08	4.46648	7.01482e-10	-0.473987	0.757642	-0.175679	0.841005	0.298307	0.782787
ENSMUSG00000058427.10	Cxcl2	2068	0.0736487	4.96175	4.57567	17.0341	6.60083	1.44194e-10	6.48417	2.65084e-10	8.38492	8.26649e-17	-0.116655	0.962912	1.78409	0.0337949	1.90075	0.0332563
ENSMUSG00000029378.5	Areg	1215	0.159074	7.7757	3.48635	15.9849	5.99067	8.0212e-07	4.82682	8.77875e-05	7.03411	2.84907e-09	-1.16385	0.631168	1.04344	0.427443	2.20729	0.0812434
ENSMUSG00000082361.6	Btc	4520	0.483492	1.40549	1.59561	2.7311	1.55752	3.07429e-05	1.7462	2.07514e-06	2.52042	1.20034e-12	0.188675	0.840248	0.962894	0.00614244	0.774219	0.0478572
ENSMUSG00000034981.9	Parm1	5068	6.26164	14.8377	13.3139	15.9184	1.24586	0.0834112	1.08929	0.129335	1.34721	0.0472874	-0.156567	0.936336	0.101354	0.918487	0.257922	0.827589
ENSMUSG00000096035.2	Odaph	3506	0.0247611	1.48118	1.4209	1.61712	6.93804	1.26303e-05	6.87893	1.3823e-05	7.06541	5.78365e-06	-0.0591168	0.98841	0.127362	0.943478	0.186479	0.936929
ENSMUSG00000029403.14	Cdkl2	6064	1.42298	1.52607	1.93129	2.99427	0.102709	0.775616	0.446417	0.123754	1.07735	2.86677e-05	0.343708	0.533813	0.974639	0.000106057	0.630932	0.0268223
ENSMUSG00000029407.10	Uso1	5847	48.4674	23.2262	23.6842	21.9456	-1.06166	3.18698e-09	-1.03337	7.43915e-09	-1.14362	8.89125e-11	0.0282876	0.96026	-0.0819662	0.74195	-0.110254	0.717639
ENSMUSG00000029417.9	Cxcl9	3016	0.472524	2.21783	7.34006	4.00702	2.26668	0.0459562	3.99987	0.000140061	3.12412	0.00306863	1.73319	0.397087	0.857438	0.506477	-0.875751	0.574757
ENSMUSG00000034842.16	Art3	3932	9.55281	1.34441	1.01645	1.2615	-2.84046	3.3296e-09	-3.24418	9.42481e-12	-2.93098	5.81603e-10	-0.403723	0.740795	-0.0905217	0.903077	0.313201	0.702514
ENSMUSG00000034855.13	Cxcl10	2252	0.797708	4.96391	10.308	9.3295	2.67074	1.68835e-05	3.72775	6.07751e-10	3.58391	2.14684e-09	1.05701	0.367556	0.913176	0.176761	-0.143838	0.900885
ENSMUSG00000034826.14	Nup54	3328	4.55109	7.92226	9.477	11.3421	0.800255	6.03134e-05	1.06205	4.24818e-08	1.31929	3.31974e-12	0.261799	0.520793	0.519031	0.00854415	0.257232	0.31534
ENSMUSG00000057068.15	Fam47e	2110	1.02275	0.152603	0.0850375	0.496002	-2.92507	0.00254961	-4.02725	4.90784e-05	-1.07661	0.276864	-1.10218	0.643925	1.84847	0.0721929	2.95064	0.00620874
ENSMUSG00000045314.5	Sowahb	3900	1.58326	3.79906	3.38869	5.01937	1.2693	0.00586983	1.10332	0.0173631	1.67132	0.000128138	-0.165985	0.894421	0.402021	0.451681	0.568006	0.332132
ENSMUSG00000058013.11	Septin11	9472	5.45697	25.6962	25.9401	22.0046	2.23633	1.14988e-29	2.25009	4.47346e-30	2.01274	2.17263e-24	0.0137607	0.984435	-0.223597	0.366802	-0.237357	0.412051
ENSMUSG00000023078.6	Cxcl13	1150	1.09668	5.62238	2.28461	1.26475	2.40056	0.00406516	1.08538	0.236952	0.215875	0.832341	-1.31519	0.399824	-2.18469	0.00697772	-0.8695	0.441026
ENSMUSG00000029484.12	Anxa3	3643	6.8122	48.1862	51.9304	57.453	2.82499	2.26359e-25	2.93281	2.25056e-27	3.07874	2.58171e-30	0.107818	0.894421	0.253756	0.467399	0.145937	0.763623
ENSMUSG00000034663.13	Bmp2k	8480	2.7722	10.1691	8.01672	8.10697	1.87728	3.03648e-18	1.53317	1.75285e-12	1.55027	6.72536e-13	-0.344113	0.442898	-0.327011	0.193533	0.0171016	0.971675
ENSMUSG00000055725.11	Paqr3	7566	1.23883	0.9132	0.668343	0.56764	-0.44266	0.156835	-0.901045	0.00149567	-1.14071	3.16842e-05	-0.458384	0.411129	-0.698047	0.0157742	-0.239663	0.573682
ENSMUSG00000029338.13	Antxr2	6655	5.56491	11.2958	9.8322	13.3868	1.02213	0.000155499	0.822511	0.00271965	1.26757	1.16295e-06	-0.199621	0.766356	0.245442	0.453048	0.445063	0.178522
ENSMUSG00000029335.5	Bmp3	7398	2.64218	0.524778	0.699471	2.4	-2.34631	1.05031e-05	-1.92495	0.000339767	-0.138716	0.834329	0.42136	0.753179	2.20759	1.92089e-05	1.78623	0.00113501
ENSMUSG00000029334.14	Prkg2	5369	1.02265	3.73429	3.09581	2.0181	1.87732	7.87465e-05	1.60645	0.000818425	0.986794	0.0454298	-0.270869	0.826704	-0.890526	0.0785968	-0.619657	0.32152
ENSMUSG00000089809.9	Rasgef1b	13805	0.957136	1.14443	0.71207	1.46374	0.259275	0.633223	-0.430439	0.381431	0.614778	0.171869	-0.689715	0.41017	0.355502	0.492604	1.04522	0.0238325
ENSMUSG00000050640.16	Tmem150c	5555	2.43022	2.2292	1.40368	0.700316	-0.125045	0.854814	-0.794522	0.136864	-1.80143	0.000184223	-0.669477	0.513388	-1.67639	0.000504994	-1.00691	0.0774065
ENSMUSG00000029322.12	Plac8	1592	34.1392	37.9945	57.6162	109.088	0.15446	0.874939	0.75564	0.345461	1.67685	0.0176751	0.60118	0.714474	1.52239	0.0371302	0.921212	0.317326
ENSMUSG00000035273.14	Hpse	3516	0.35863	6.69073	6.70509	6.23335	4.26424	4.38724e-28	4.2684	3.36457e-28	4.16271	4.50519e-27	0.00416745	0.998563	-0.101527	0.840871	-0.105694	0.875438
ENSMUSG00000029314.14	Gpat3	3502	1.2418	1.80579	2.02191	4.58869	0.543195	0.311422	0.711127	0.158474	1.8947	1.90608e-05	0.167932	0.895136	1.3515	0.00254566	1.18357	0.0144138
ENSMUSG00000029330.8	Cds1	3939	11.7168	4.75912	5.54824	9.16453	-1.30145	0.00129346	-1.07955	0.00832244	-0.355393	0.424632	0.221906	0.834467	0.946061	0.0218845	0.724155	0.129814
ENSMUSG00000034573.14	Ptpn13	12102	12.8553	8.29262	5.69065	15.2047	-0.632771	0.147953	-1.1761	0.00305567	0.242125	0.592288	-0.543329	0.504626	0.874896	0.0323729	1.41822	0.000302291
ENSMUSG00000029321.1	Slc10a6	2124	0.302007	0.738126	0.67617	2.02226	1.35336	0.102931	1.21362	0.141883	2.83256	0.000102539	-0.139746	0.948543	1.4792	0.0450432	1.61895	0.0390141
ENSMUSG00000029311.16	Hsd17b11	3265	26.5235	14.265	9.66548	12.3498	-0.89487	0.000142028	-1.458	1.16871e-10	-1.10317	1.20353e-06	-0.563128	0.142665	-0.208299	0.470834	0.354829	0.238651
ENSMUSG00000029304.14	Spp1	1648	1.82425	220.945	105.716	223.297	6.94263	9.06684e-09	5.87894	1.35987e-06	6.95791	5.30924e-09	-1.06369	0.716935	0.0152727	0.996396	1.07896	0.55757
ENSMUSG00000029299.14	Abcg3	3550	0.221226	1.20168	0.827248	0.557876	2.51246	1.24284e-05	1.96465	0.000825625	1.38959	0.0200695	-0.547805	0.644792	-1.12287	0.045641	-0.575064	0.445735
ENSMUSG00000034438.16	Gbp8	3443	0.282256	1.01678	1.1341	0.841387	1.90074	0.00536922	2.06083	0.00207923	1.62415	0.0156881	0.160093	0.931495	-0.276592	0.742001	-0.436685	0.657897
ENSMUSG00000029298.15	Gbp9	5173	1.90338	6.31232	11.1112	10.5806	1.73432	0.000615219	2.55123	1.62063e-07	2.48038	2.75908e-07	0.816906	0.405766	0.746057	0.180073	-0.0708488	0.945249
ENSMUSG00000079363.7	Gbp4	7494	0.903795	1.37893	2.33973	2.90591	0.613038	0.435331	1.37901	0.0445148	1.69167	0.00972733	0.765969	0.585222	1.07863	0.12845	0.31266	0.778419
ENSMUSG00000079362.5	Gm43302	4310	0.655782	1.89237	3.5284	2.3577	1.54549	0.0164254	2.44852	5.3161e-05	1.8646	0.00225262	0.903031	0.455634	0.319119	0.686092	-0.583912	0.499794
ENSMUSG00000104713.4	Gbp6	5954	0.630526	1.86239	3.42892	2.36137	1.57558	0.0110618	2.45924	2.68779e-05	1.9195	0.00111832	0.88366	0.451894	0.343924	0.65066	-0.539737	0.528175
ENSMUSG00000070639.5	Lrrc8b	6726	2.3066	5.82398	6.60439	10.3173	1.33883	0.00327715	1.52085	0.000643406	2.16463	4.11186e-07	0.18202	0.884822	0.825795	0.0826914	0.643775	0.255568
ENSMUSG00000054720.12	Lrrc8c	7654	1.30299	5.74827	4.70258	9.60506	2.14637	1.45057e-06	1.85612	3.51546e-05	2.88776	2.21292e-11	-0.290243	0.800754	0.741389	0.134081	1.03163	0.0406362
ENSMUSG00000046079.16	Lrrc8d	12573	1.69826	4.44766	5.88513	5.32131	1.39077	0.00140342	1.79524	2.12105e-05	1.6499	8.20495e-05	0.40447	0.681715	0.259127	0.638194	-0.145342	0.853573
ENSMUSG00000029283.17	Cdc7	4183	0.992116	2.00789	2.43578	2.28555	1.02218	0.00340742	1.30653	0.000105829	1.21279	0.000279416	0.28435	0.713143	0.190607	0.6532	-0.0937422	0.878095
ENSMUSG00000029287.14	Tgfbr3	6545	26.2292	12.9669	6.86458	5.89162	-1.01675	0.199721	-1.93539	0.00684703	-2.15561	0.00191872	-0.918645	0.533194	-1.13886	0.139978	-0.220219	0.86617
ENSMUSG00000033805.12	Ephx4	1646	0.115269	2.42933	2.39732	3.91543	4.77228	3.8943e-07	4.75205	3.91512e-07	5.46526	2.66142e-09	-0.020232	0.995042	0.692982	0.450354	0.713214	0.515981
ENSMUSG00000029276.13	Glmn	2688	1.62058	3.02326	3.14425	3.42418	0.906229	0.00112001	0.964225	0.000438184	1.08481	4.61086e-05	0.057996	0.940104	0.178584	0.587032	0.120588	0.788245
ENSMUSG00000063406.11	Tmed5	7688	2.6856	5.81545	6.3701	9.6517	1.11637	1.89986e-06	1.24883	6.72867e-08	1.84749	2.02997e-16	0.132461	0.830786	0.73112	0.00171398	0.598658	0.0190907
ENSMUSG00000056531.11	Ccdc18	6433	0.356368	0.729432	1.17911	1.12272	1.04969	0.000752043	1.7547	2.18468e-09	1.67986	7.89849e-09	0.705004	0.104542	0.63017	0.0286794	-0.0748343	0.884617
ENSMUSG00000029490.4	Mfsd7a	5340	1.31629	0.80436	0.571077	0.498441	-0.715087	0.138606	-1.22881	0.00582135	-1.41577	0.00103606	-0.513728	0.588901	-0.700687	0.14756	-0.18696	0.811172
ENSMUSG00000033623.13	Pcgf3	9544	5.47929	10.0958	11.1956	13.5537	0.881988	7.51289e-08	1.03197	1.73245e-10	1.3071	1.82236e-16	0.149986	0.700918	0.425111	0.0125866	0.275125	0.179464
ENSMUSG00000013495.15	Tmem175	5928	4.23912	2.7912	2.51641	1.89861	-0.603417	0.000394885	-0.759574	5.01217e-06	-1.16361	6.25018e-13	-0.156158	0.692691	-0.560193	0.000914984	-0.404035	0.0347571
ENSMUSG00000066613.14	Zfp932	3272	4.21406	2.70829	2.60715	1.98514	-0.638956	8.06219e-06	-0.700176	7.91899e-07	-1.09269	3.86814e-15	-0.0612199	0.883257	-0.453734	0.00211042	-0.392515	0.0144428
ENSMUSG00000029499.11	Pxmp2	1200	2.99324	1.28313	1.2305	2.22857	-1.23695	4.60539e-05	-1.3025	1.59448e-05	-0.423579	0.172435	-0.0655474	0.946398	0.813369	0.00825611	0.878916	0.00620815
ENSMUSG00000007080.14	Pole	11160	0.523087	3.00569	4.05604	3.80038	2.53118	3.7858e-15	2.96527	1.25411e-20	2.87046	1.56463e-19	0.434092	0.526062	0.339277	0.381778	-0.0948155	0.876357
ENSMUSG00000029503.16	P2rx2	2574	3.09311	3.21193	1.55955	0.146268	0.0549726	0.974785	-0.99938	0.402249	-4.5826	7.21551e-06	-1.05435	0.646989	-4.63757	3.81641e-06	-3.58322	0.000884032
ENSMUSG00000033316.14	Galnt9	3006	1.30332	0.351963	0.159244	0.0764361	-1.93188	0.0714377	-3.17392	0.00173436	-4.37309	1.3124e-05	-1.24205	0.56861	-2.44121	0.0256232	-1.19917	0.420602
ENSMUSG00000033294.11	Noc4l	2596	4.05556	6.24075	8.44323	9.54714	0.623592	0.00452669	1.06425	2.54805e-07	1.23866	8.85885e-10	0.440656	0.220122	0.615069	0.00265856	0.174414	0.565167
ENSMUSG00000029521.7	Chek2	3001	9.2005	4.59624	5.54242	5.80543	-1.00387	0.000404011	-0.730802	0.0119087	-0.666222	0.0198736	0.273073	0.674376	0.337653	0.302789	0.0645799	0.904901
ENSMUSG00000033209.17	Ttc28	12315	6.56091	6.61631	4.325	2.41169	0.0121241	0.986692	-0.601904	0.146349	-1.44491	9.36043e-05	-0.614029	0.414722	-1.45703	6.50741e-05	-0.843006	0.0487714
ENSMUSG00000070576.4	Mn1	6940	3.71858	4.11125	2.00874	0.86776	0.144997	0.824573	-0.892206	0.0799576	-2.10663	5.02575e-06	-1.0372	0.20634	-2.25162	4.95283e-07	-1.21442	0.0198286
ENSMUSG00000072720.9	Myo18b	10698	1.32405	0.084714	0.0602113	0.0376568	-4.03351	8.1024e-06	-4.57498	3.5777e-07	-5.28991	3.16636e-09	-0.541475	0.828233	-1.2564	0.252019	-0.714928	0.633497
ENSMUSG00000042249.11	Grk3	8693	13.4824	7.22478	5.81813	5.54499	-0.900405	0.0469971	-1.21345	0.00488298	-1.28215	0.00229588	-0.313043	0.767712	-0.381741	0.459225	-0.0686982	0.93653
ENSMUSG00000042216.13	Sgsm1	7466	0.841533	1.49298	1.05264	2.73077	0.83156	0.238318	0.325252	0.675591	1.7047	0.00565422	-0.506308	0.729236	0.873144	0.203433	1.37945	0.0449177
ENSMUSG00000042190.12	Cmklr1	3408	2.25875	13.3793	11.4277	14.4246	2.57354	2.37771e-07	2.34554	2.64697e-06	2.68222	4.28788e-08	-0.228005	0.869304	0.108677	0.882403	0.336682	0.675273
ENSMUSG00000053334.6	Ficd	3133	11.2553	3.26161	3.20681	3.56165	-1.78983	1.00521e-38	-1.82011	5.72483e-40	-1.66183	1.71632e-34	-0.0302786	0.948543	0.127997	0.49556	0.158276	0.4644
ENSMUSG00000025825.12	Iscu	2176	18.6544	10.1678	9.12173	9.93242	-0.87626	1.10252e-08	-1.03477	8.85165e-12	-0.91055	1.51182e-09	-0.158507	0.664043	-0.0342905	0.8819	0.124216	0.609969
ENSMUSG00000054675.5	Tmem119	2315	3.79039	29.8933	17.3653	4.81639	2.98545	2.42948e-07	2.20129	0.000191849	0.347478	0.614978	-0.784161	0.526062	-2.63798	2.28183e-06	-1.85381	0.00236284
ENSMUSG00000048163.13	Selplg	4272	0.671106	6.41942	3.50233	10.9619	3.27933	5.21312e-09	2.40248	2.72107e-05	4.0523	1.51233e-13	-0.876848	0.436917	0.772973	0.22778	1.64982	0.00560104
ENSMUSG00000004530.12	Coro1c	9664	7.02788	19.4589	19.2234	24.8422	1.47	6.97671e-16	1.45267	1.33534e-15	1.82238	2.68443e-24	-0.0173373	0.977844	0.352376	0.085799	0.369714	0.0977879
ENSMUSG00000029591.14	Ung	5468	0.522947	1.79394	2.71668	2.36553	1.79217	2.98387e-08	2.39654	3.0654e-14	2.19452	3.09679e-12	0.604372	0.286695	0.402348	0.254036	-0.202025	0.678999
ENSMUSG00000042010.16	Acacb	9632	17.1743	1.32009	0.800395	0.933937	-3.70532	1.10024e-24	-4.43501	7.67525e-35	-4.20696	8.23423e-32	-0.729684	0.320684	-0.501637	0.259594	0.228047	0.722962
ENSMUSG00000001098.15	Kctd10	4039	13.8281	33.5353	30.1191	39.5175	1.27891	1.3169e-18	1.12393	1.37204e-14	1.51597	3.91097e-26	-0.154974	0.651191	0.237063	0.157837	0.392037	0.0169403
ENSMUSG00000041930.7	Fam222a	3141	3.64823	0.796477	0.386975	0.703475	-2.21454	0.00400312	-3.29037	9.6051e-06	-2.39579	0.00125867	-1.07582	0.49855	-0.181252	0.866322	0.894572	0.39496
ENSMUSG00000014158.12	Trpv4	4076	2.84466	3.37768	6.56107	7.5053	0.248733	0.738044	1.20963	0.0403705	1.40318	0.0131134	0.9609	0.374492	1.15445	0.0503252	0.193551	0.85067
ENSMUSG00000011884.13	Gltp	1762	44.7596	34.7958	32.8104	78.0806	-0.363478	0.52317	-0.448256	0.401404	0.802969	0.0941046	-0.0847778	0.951924	1.16645	0.0128495	1.25122	0.0106836
ENSMUSG00000002486.15	Tchp	7397	2.27897	1.44616	1.53828	1.12231	-0.658904	0.00014929	-0.575145	0.000977638	-1.02703	7.29928e-10	0.0837593	0.859663	-0.368122	0.0472889	-0.451881	0.0175303
ENSMUSG00000029561.17	Oasl2	6374	2.16385	21.4095	46.8953	52.3547	3.31126	5.34328e-14	4.44274	1.05818e-24	4.60156	1.25975e-26	1.13148	0.121697	1.2903	0.00519325	0.158821	0.850932
ENSMUSG00000041827.15	Oasl1	2608	0.851385	9.11454	23.1737	48.4729	3.44963	4.41626e-09	4.79756	7.09108e-17	5.86244	5.14847e-25	1.34793	0.17065	2.41281	1.76424e-05	1.06488	0.13094
ENSMUSG00000029559.15	2210016L21Rik	3303	7.98406	5.29314	4.72112	3.89021	-0.593469	5.24944e-06	-0.762758	2.59757e-09	-1.0425	1.19822e-16	-0.169289	0.549656	-0.449034	0.000647678	-0.279744	0.0711498
ENSMUSG00000009013.5	Dynll1	3890	14.1718	22.6391	30.2327	42.3638	0.67619	0.00261871	1.09417	3.01723e-07	1.58057	2.65183e-14	0.417983	0.306969	0.904376	1.43787e-05	0.486393	0.0483427
ENSMUSG00000054256.11	Msi1	5800	0.299978	0.955722	1.24328	0.109952	1.7009	0.00577774	2.08477	0.000477457	-1.50526	0.0177862	0.383873	0.793833	-3.20616	1.44562e-08	-3.59003	1.6222e-10
ENSMUSG00000029522.12	Pla2g1b	713	0.0867654	0.170993	0.138923	1.30558	1.84899	0.509882	1.29111	0.653984	5.33207	0.0168198	-0.557872	NA	3.48309	0.0848426	4.04096	0.066992
ENSMUSG00000029524.16	Sirt4	2398	4.88908	2.6257	2.57964	1.80206	-0.899349	0.000242861	-0.934536	0.000119402	-1.45248	7.03364e-10	-0.0351873	0.963225	-0.553136	0.0345961	-0.517948	0.0722846
ENSMUSG00000029518.15	Rab35	2820	12.244	19.8506	20.5127	26.9067	0.69904	1.09771e-08	0.747699	6.91671e-10	1.13767	4.36192e-22	0.0486591	0.88893	0.438632	0.000218069	0.389973	0.00183898
ENSMUSG00000029516.19	Cit	16417	0.468636	2.39736	2.77751	2.162	2.36184	5.41404e-11	2.57526	5.30456e-13	2.21324	5.71911e-10	0.213418	0.82478	-0.1486	0.765037	-0.362018	0.492297
ENSMUSG00000041548.4	Hspb8	1950	30.1482	23.303	20.525	8.26902	-0.371945	0.505748	-0.555758	0.279422	-1.86839	2.24083e-05	-0.183813	0.886647	-1.49645	0.000818783	-1.31264	0.00609055
ENSMUSG00000061288.13	Taok3	11159	3.24818	7.01379	5.37051	7.67246	1.11161	0.000581796	0.725483	0.0312511	1.24103	7.34917e-05	-0.386125	0.574321	0.129425	0.76487	0.51555	0.193432
ENSMUSG00000029363.14	Rfc5	4669	2.33799	4.35728	5.36296	5.21573	0.900803	0.0038527	1.20323	6.04592e-05	1.16101	8.85352e-05	0.30243	0.654279	0.260208	0.476619	-0.0422226	0.945413
ENSMUSG00000032898.9	Fbxo21	5545	16.4497	5.84694	4.87705	3.90777	-1.49357	6.60842e-08	-1.7559	1.24933e-10	-2.07476	1.29114e-14	-0.262331	0.692691	-0.581196	0.0556357	-0.318866	0.423431
ENSMUSG00000029359.13	Tesc	1591	0.68838	3.7532	2.68107	0.543024	2.49515	0.0620527	2.00315	0.138474	-0.351846	0.818786	-0.491997	0.887492	-2.847	0.0259046	-2.355	0.105076
ENSMUSG00000018604.18	Tbx3	6624	73.7486	35.2831	34.2754	35.6645	-1.06385	3.07476e-07	-1.10561	8.47593e-08	-1.04834	3.09666e-07	-0.0417541	0.948597	0.015514	0.963055	0.0572682	0.887715
ENSMUSG00000018263.11	Tbx5	4675	0.0264313	0.0213027	0.0131287	3.20946	-0.611434	0.735276	-2.02058	0.265835	7.52354	1.10197e-11	-1.40914	0.717669	8.13498	1.32946e-15	9.54412	7.07249e-13
ENSMUSG00000029596.13	Sdsl	1497	1.28455	0.9446	0.897842	0.469295	-0.461236	0.30119	-0.529883	0.216129	-1.52064	0.000113441	-0.0686468	0.953232	-1.0594	0.00993492	-0.990758	0.0262376
ENSMUSG00000029602.11	Rasal1	3539	2.59904	1.49145	1.43385	0.104852	-0.80586	0.278086	-0.869777	0.225605	-4.80092	1.95421e-13	-0.0639178	0.975441	-3.99506	4.86264e-10	-3.93114	1.42007e-09
ENSMUSG00000029603.15	Dtx1	5270	1.90854	0.449139	0.45788	0.281095	-2.107	0.00240288	-2.08865	0.00243018	-2.79794	2.57896e-05	0.0183526	0.995042	-0.690935	0.404727	-0.709288	0.471743
ENSMUSG00000032690.16	Oas2	4451	0.594246	10.1546	23.7461	27.6215	4.12365	1.5324e-24	5.35005	4.78847e-41	5.56806	1.22845e-44	1.22639	0.0340202	1.44441	0.000252025	0.218015	0.747315
ENSMUSG00000032661.9	Oas3	7069	0.141609	4.9598	9.8208	14.6279	5.20344	9.19245e-17	6.18989	1.62894e-23	6.76483	3.9403e-28	0.98645	0.419614	1.56139	0.0133767	0.574939	0.522817
ENSMUSG00000066861.14	Oas1g	2340	0.405031	4.44357	9.4722	12.0408	3.52916	1.42986e-11	4.62441	1.84143e-19	4.97017	1.49749e-22	1.09525	0.188838	1.44101	0.00328812	0.345757	0.651116
ENSMUSG00000052776.10	Oas1a	1885	0.727684	15.3583	29.2391	37.6295	4.44947	1.14962e-24	5.37952	6.85527e-36	5.74322	4.63369e-41	0.930053	0.191294	1.29375	0.00180095	0.363698	0.555069
ENSMUSG00000029455.14	Aldh2	5126	49.6654	15.8062	13.3581	26.0767	-1.65224	0.000756918	-1.89534	8.18741e-05	-0.92965	0.0652577	-0.243095	0.852656	0.722591	0.184427	0.965686	0.0888425
ENSMUSG00000042647.13	Acad12	6516	2.1064	0.533843	0.484517	0.49534	-1.99168	2.06512e-06	-2.147	2.54249e-07	-2.10172	3.16204e-07	-0.155313	0.899847	-0.110034	0.858391	0.0452793	0.959809
ENSMUSG00000029456.12	Acad10	6068	4.48966	1.09427	0.749737	0.785124	-2.04338	1.15763e-08	-2.60013	2.1954e-13	-2.52563	6.45409e-13	-0.556748	0.469424	-0.482248	0.263309	0.0745002	0.920545
ENSMUSG00000042589.18	Cux2	10082	2.76823	0.374067	0.175744	0.126795	-2.90226	0.00152156	-4.01784	6.01953e-06	-4.49449	2.6107e-07	-1.11559	0.56812	-1.59224	0.109894	-0.476652	0.75994
ENSMUSG00000064267.13	Hvcn1	3563	1.96399	5.54117	3.04451	6.11479	1.50243	0.053801	0.635935	0.457643	1.6448	0.025895	-0.866497	0.577286	0.142363	0.892722	1.00886	0.281628
ENSMUSG00000038593.18	Tctn1	8295	4.9625	2.92561	2.43382	1.99939	-0.762557	1.37672e-11	-1.0332	2.14569e-20	-1.31394	1.58171e-32	-0.270642	0.180119	-0.551384	1.03812e-06	-0.280741	0.0377366
ENSMUSG00000038569.13	Rad9b	4322	1.365	0.61524	0.513045	0.534112	-1.16464	3.38452e-09	-1.43827	4.30788e-13	-1.36468	1.58593e-12	-0.273627	0.559324	-0.200036	0.442511	0.0735908	0.856077
ENSMUSG00000029465.14	Arpc3	2762	18.9693	35.3152	33.7037	47.8751	0.897275	1.80164e-05	0.83006	7.51207e-05	1.33608	2.97856e-11	-0.0672148	0.910349	0.438807	0.0481577	0.506022	0.029331
ENSMUSG00000029468.17	P2rx7	5970	7.20494	7.64927	4.93669	3.34944	0.0865043	0.914757	-0.546973	0.399238	-1.10664	0.0547366	-0.633477	0.600607	-1.19314	0.0419562	-0.559666	0.483321
ENSMUSG00000049686.14	Orai1	2295	4.59143	6.96157	6.74652	10.7507	0.603866	0.0028239	0.561287	0.00548003	1.23232	3.66369e-11	-0.0425788	0.94021	0.628457	0.000700587	0.671035	0.000406851
ENSMUSG00000054434.14	Tmem120b	2852	5.9656	2.63083	2.52852	2.37922	-1.18854	3.34965e-10	-1.24025	4.33112e-11	-1.33659	6.06093e-13	-0.051708	0.930972	-0.148051	0.557541	-0.0963427	0.781327
ENSMUSG00000029449.11	Rhof	4602	0.240989	1.61862	1.42806	5.40091	2.8033	1.02506e-06	2.62516	4.82626e-06	4.54747	1.36508e-16	-0.178138	0.908539	1.74418	0.00117423	1.92231	0.00045571
ENSMUSG00000029438.9	Bcl7a	9490	5.71079	2.4124	3.0615	3.67121	-1.24418	5.11475e-09	-0.900703	3.17265e-05	-0.638472	0.00349877	0.343476	0.433858	0.605707	0.00656098	0.262232	0.380285
ENSMUSG00000029414.11	Kntc1	7983	0.60698	3.04713	4.18649	3.72564	2.33718	7.12906e-10	2.79753	6.93101e-14	2.62858	1.62661e-12	0.460345	0.573913	0.291393	0.540931	-0.168951	0.800163
ENSMUSG00000045502.6	Hcar2	1930	0.206447	6.4559	6.03361	19.9904	5.13826	1.93801e-13	5.04204	4.7351e-13	6.77294	4.20278e-23	-0.096223	0.959777	1.63467	0.00986502	1.7309	0.00897154
ENSMUSG00000049241.5	Hcar1	3285	2.70062	0.42801	0.292354	0.0304129	-2.69897	0.0154395	-3.25815	0.0026171	-7.31934	5.35862e-10	-0.559177	0.846923	-4.62038	0.000186006	-4.0612	0.00198081
ENSMUSG00000029408.13	Abcb9	5601	1.19159	0.659421	0.370782	0.4872	-0.858941	0.0258998	-1.7103	2.59046e-06	-1.30468	0.000291546	-0.851355	0.180777	-0.445739	0.297521	0.405616	0.446251
ENSMUSG00000023707.13	Ogfod2	2260	10.0556	4.80971	4.68591	4.47367	-1.06706	9.25259e-12	-1.10897	1.06163e-12	-1.17573	2.10179e-14	-0.0419147	0.932573	-0.108669	0.607509	-0.066754	0.822114
ENSMUSG00000037979.13	Ccdc92	2729	5.90461	1.35218	1.4356	1.79314	-2.13835	3.10274e-06	-2.05506	7.04552e-06	-1.72604	0.000146788	0.0832813	0.954687	0.412302	0.474966	0.32902	0.657044
ENSMUSG00000070498.3	Tmem132b	8238	1.27952	0.0486049	0.0320871	0.0539635	-4.88677	1.24764e-12	-5.56605	4.87892e-15	-4.68725	2.66614e-12	-0.679289	0.726763	0.199515	0.854373	0.878804	0.432968
ENSMUSG00000034324.16	Tmem132c	5850	1.75387	0.261601	0.097557	0.976238	-2.78302	0.00408637	-4.27577	5.5382e-06	-0.849538	0.416667	-1.49276	0.443887	1.93348	0.0538581	3.42623	0.000423913
ENSMUSG00000049971.17	Glt1d1	4378	1.43383	1.24815	0.966284	0.21838	-0.201582	0.849523	-0.579314	0.527914	-2.76629	0.00027596	-0.377732	0.853133	-2.5647	0.000787391	-2.18697	0.00797329
ENSMUSG00000081683.5	Fzd10	3250	0.961797	0.391601	0.884338	2.14361	-1.32832	0.051222	-0.115441	0.893097	1.16624	0.0699306	1.21288	0.303665	2.49456	3.31645e-05	1.28168	0.0699174
ENSMUSG00000029428.13	Stx2	4586	2.32977	5.85524	5.66214	3.65604	1.33281	1.36876e-06	1.28391	3.13848e-06	0.653363	0.0232193	-0.0488949	0.953984	-0.679446	0.0167573	-0.630551	0.0418516
ENSMUSG00000029430.13	Ran	2646	18.1544	51.7875	69.7292	83.116	1.51304	8.32962e-09	1.94273	4.92974e-14	2.19582	7.53209e-18	0.429688	0.42108	0.682781	0.0133848	0.253093	0.519156
ENSMUSG00000044017.16	Adgrd1	8321	5.93096	8.57779	7.73274	0.530692	0.532799	0.542562	0.38264	0.66422	-3.49465	2.50447e-07	-0.150159	0.943481	-4.02745	5.02701e-10	-3.87729	3.50155e-09
ENSMUSG00000029436.9	Mmp17	6619	4.31812	1.56127	1.07067	0.33441	-1.47234	9.13075e-05	-2.02312	3.48249e-08	-3.7171	1.41637e-24	-0.550774	0.485814	-2.24476	4.63227e-10	-1.69399	9.30921e-06
ENSMUSG00000029447.11	Cct6a	3620	24.5449	38.0708	49.3439	53.9557	0.633383	0.000768881	1.00824	2.1157e-08	1.13672	1.44303e-10	0.37486	0.262708	0.503342	0.00742198	0.128482	0.660176
ENSMUSG00000095789.6	Nupr1l	2489	1.0401	0.266793	0.302152	0.344114	-2.03005	5.02275e-05	-1.88528	0.000146913	-1.64983	0.00065609	0.144768	0.925341	0.38022	0.565902	0.235453	0.795285
ENSMUSG00000034118.15	Tpst1	2789	5.97876	11.0227	7.22635	5.07775	0.883931	0.0360909	0.27372	0.570954	-0.235846	0.608537	-0.61021	0.436917	-1.11978	0.00486971	-0.509567	0.33383
ENSMUSG00000053094.15	Tmem248	4086	42.1088	21.405	19.8604	21.2956	-0.976554	1.45677e-16	-1.08401	2.74755e-20	-0.984348	4.44577e-17	-0.107457	0.716296	-0.00779408	0.969005	0.0996633	0.599101
ENSMUSG00000034040.16	Galnt17	9408	1.91361	4.80431	3.83958	0.117735	1.33023	1.00837e-05	1.00601	0.00107435	-4.05265	3.88107e-38	-0.324222	0.628643	-5.38287	9.03023e-77	-5.05865	1.81153e-67
ENSMUSG00000015950.13	Ncf1	3663	0.831841	11.5636	8.99664	16.9835	3.81561	3.14844e-08	3.45256	6.01792e-07	4.37057	1.01181e-10	-0.363044	0.846704	0.554967	0.523849	0.918011	0.322534
ENSMUSG00000023104.9	Rfc2	6303	2.81755	5.0105	6.11584	6.75515	0.831673	0.00154505	1.1213	9.78111e-06	1.26337	3.58411e-07	0.289626	0.600607	0.431692	0.121425	0.142067	0.736588
ENSMUSG00000040751.12	Lat2	2621	0.811517	4.96448	3.18657	1.77465	2.63559	3.5552e-07	1.98951	0.00016578	1.14298	0.0368381	-0.646085	0.550732	-1.49261	0.00373192	-0.846524	0.181116
ENSMUSG00000029674.13	Limk1	7162	1.17263	4.27736	3.73408	3.29639	1.87138	1.95277e-10	1.67574	1.32095e-08	1.49547	3.63089e-07	-0.195643	0.796475	-0.375913	0.270893	-0.18027	0.711118
ENSMUSG00000029675.12	Eln	8098	8.1139	20.1693	14.037	41.974	1.31421	0.0248561	0.790979	0.199389	2.37181	1.00647e-05	-0.523233	0.682332	1.0576	0.0751863	1.58084	0.00701289
ENSMUSG00000040557.14	Mettl27	3347	10.0442	2.88406	2.23947	1.89306	-1.80419	7.68766e-07	-2.17505	1.48843e-09	-2.41833	1.01403e-11	-0.37086	0.66868	-0.614144	0.140525	-0.243285	0.689983
ENSMUSG00000047501.3	Cldn4	1816	52.7002	125.226	133.682	187.778	1.2491	0.000331087	1.34342	9.19143e-05	1.83363	3.3606e-08	0.0943257	0.924933	0.58453	0.123697	0.490204	0.275232
ENSMUSG00000007207.10	Stx1a	2666	1.00864	2.96741	2.79439	2.23622	1.57126	9.62112e-08	1.48589	4.69929e-07	1.16384	8.81157e-05	-0.0853663	0.913368	-0.407422	0.190724	-0.322056	0.399648
ENSMUSG00000043614.13	Vps37d	1544	1.45477	1.24776	0.987854	0.404207	-0.22678	0.620724	-0.55677	0.163673	-1.92106	3.58657e-07	-0.32999	0.689657	-1.69428	5.06783e-06	-1.36429	0.000673648
ENSMUSG00000000916.15	Nsun5	4317	3.31857	1.527	1.69539	1.80186	-1.12643	8.26788e-16	-0.975935	2.1895e-12	-0.88633	8.68125e-11	0.150499	0.662452	0.240105	0.144352	0.0896058	0.70975
ENSMUSG00000005514.14	Por	4021	20.8329	47.0872	51.4708	98.0307	1.17689	0.0391852	1.30545	0.0186982	2.23492	1.64043e-05	0.128553	0.935335	1.05803	0.0631537	0.929479	0.151909
ENSMUSG00000019179.10	Mdh2	3562	25.1949	34.4766	42.827	55.3745	0.452646	0.103678	0.766068	0.00277449	1.13639	3.19833e-06	0.313421	0.559706	0.683739	0.00743495	0.370318	0.250553
ENSMUSG00000051391.9	Ywhag	5500	22.387	45.5373	55.9472	69.6956	1.02455	9.67342e-06	1.32184	5.1286e-09	1.63873	1.59279e-13	0.297294	0.550008	0.614183	0.0100473	0.316889	0.3035
ENSMUSG00000042985.7	Upk3b	3530	0.137614	0.477084	0.255887	2.09758	1.88742	0.139614	0.936693	0.49604	4.05217	0.00029845	-0.950722	0.71758	2.16476	0.0639895	3.11548	0.00779617
ENSMUSG00000006143.12	Upk3bl	1303	0.033116	0.158149	0.198443	2.44473	3.8321	0.0635742	4.26453	0.032286	8.11596	7.09087e-06	0.432432	0.916801	4.28386	0.00212783	3.85143	0.00887404
ENSMUSG00000039747.11	Orai2	6077	1.31393	4.74455	3.26459	7.04235	1.85817	7.83378e-05	1.31758	0.00651406	2.4282	8.48999e-08	-0.540586	0.595117	0.570035	0.290888	1.11062	0.0322608
ENSMUSG00000005057.13	Sh2b2	5406	0.372861	2.72126	2.33137	2.59931	2.89527	1.70003e-11	2.67135	5.62648e-10	2.83015	3.02994e-11	-0.223922	0.842	-0.0651189	0.918003	0.158803	0.83567
ENSMUSG00000001739.14	Cldn15	2124	0.275897	1.00376	0.90538	0.829604	1.93902	0.0399842	1.7778	0.0588363	1.65814	0.0713366	-0.161217	0.949268	-0.280876	0.808624	-0.119659	0.945249
ENSMUSG00000004846.10	Plod3	4519	8.51272	25.8022	29.219	16.8979	1.60088	3.56588e-10	1.78057	1.7845e-12	0.990412	0.000134666	0.179688	0.787593	-0.610467	0.0255894	-0.790155	0.00405332
ENSMUSG00000004849.14	Ap1s1	2198	8.73874	21.1108	21.3256	23.7225	1.27468	2.52576e-09	1.29035	1.31136e-09	1.44294	5.93346e-12	0.015674	0.982692	0.16826	0.534314	0.152586	0.653541
ENSMUSG00000037411.10	Serpine1	3876	0.733315	33.0578	40.9663	35.2701	5.51834	1.69691e-21	5.82785	5.75714e-24	5.61191	1.93311e-22	0.309509	0.847749	0.0935686	0.917363	-0.21594	0.844576
ENSMUSG00000051502.7	Ufsp1	1037	5.19162	2.32863	2.795	4.13371	-1.17141	0.00452955	-0.895839	0.0325245	-0.335141	0.448937	0.275571	0.787593	0.836269	0.0476049	0.560697	0.275891
ENSMUSG00000029710.15	Ephb4	4640	10.9325	24.5167	25.8661	25.1866	1.16586	0.000684281	1.24337	0.000244434	1.20495	0.000317654	0.0775098	0.938767	0.0390894	0.940484	-0.0384204	0.956647
ENSMUSG00000029714.11	Gigyf1	5505	17.3939	9.49912	8.4145	7.62302	-0.873085	1.2392e-07	-1.04982	1.11469e-10	-1.19125	1.19373e-13	-0.176739	0.643925	-0.318167	0.0830078	-0.141427	0.581042
ENSMUSG00000029718.14	Pcolce	3823	4.15678	53.137	29.4721	7.96726	3.67986	6.1236e-14	2.82917	1.16053e-08	0.940817	0.0794275	-0.850686	0.396695	-2.73904	7.34238e-09	-1.88836	0.000226383
ENSMUSG00000079165.10	Sap25	1569	10.9307	6.02018	4.45376	4.27528	-0.862506	0.00711285	-1.30655	2.00986e-05	-1.36018	6.16809e-06	-0.444041	0.493396	-0.497672	0.14971	-0.0536316	0.932774
ENSMUSG00000045348.16	Nyap1	5244	1.19531	1.34921	0.768067	0.512504	0.175978	0.804357	-0.645575	0.276251	-1.23122	0.0211587	-0.821553	0.42686	-1.4072	0.00792066	-0.585645	0.422859
ENSMUSG00000037108.13	Zcwpw1	5697	0.479746	1.0651	1.13169	0.64716	1.16498	0.0465964	1.2562	0.0278866	0.44359	0.473692	0.0912201	0.955945	-0.721389	0.236292	-0.812609	0.230466
ENSMUSG00000046245.13	Pilra	3090	0.235498	3.80897	2.46757	5.67138	4.10331	2.11254e-09	3.47304	4.92603e-07	4.67933	3.26715e-12	-0.630268	0.67595	0.576019	0.471844	1.20629	0.123268
ENSMUSG00000066684.10	Pilrb1	1957	0.156135	1.24832	0.758513	1.57951	3.18345	1.7974e-05	2.44645	0.00132096	3.52914	1.02062e-06	-0.736996	0.586184	0.345692	0.66542	1.08269	0.149808
ENSMUSG00000066682.11	Pilrb2	1957	0.116293	1.63585	0.992461	1.61579	4.10026	1.65703e-08	3.35958	5.25017e-06	4.08102	1.22038e-08	-0.740675	0.513896	-0.0192386	0.983578	0.721437	0.311726
ENSMUSG00000029727.7	Cyp3a13	2956	0.069234	0.391498	0.216122	1.59613	2.77909	0.0684642	1.88191	0.235021	4.84911	0.000429055	-0.897177	0.78646	2.07002	0.145946	2.96719	0.0414623
ENSMUSG00000029730.16	Mcm7	4426	4.98595	14.4786	23.0541	23.5543	1.53987	3.21661e-07	2.2119	4.78007e-14	2.24243	1.43353e-14	0.672029	0.20122	0.702556	0.027175	0.0305274	0.961493
ENSMUSG00000036968.15	Cnpy4	2399	3.4497	10.1994	12.2147	9.96862	1.56758	7.73227e-10	1.8305	3.21124e-13	1.53499	1.0785e-09	0.26292	0.645413	-0.032593	0.933104	-0.295513	0.397554
ENSMUSG00000047592.17	Nxpe5	4473	0.100781	3.74833	2.19351	0.305228	5.35679	1.40704e-10	4.57862	5.08338e-08	1.69875	0.0616029	-0.778169	0.668813	-3.65804	1.37157e-06	-2.87987	0.000365631
ENSMUSG00000075593.10	Gal3st4	3252	0.364672	1.02398	0.868673	0.275404	1.52292	0.0043888	1.27838	0.0182864	-0.444732	0.463726	-0.244537	0.852128	-1.96765	5.78362e-05	-1.72312	0.000873798
ENSMUSG00000106247.1	Gm43720	6411	0.688859	1.86011	2.27207	1.33836	1.4435	3.53051e-05	1.73438	3.90606e-07	0.96734	0.00633501	0.290886	0.716265	-0.476159	0.214681	-0.767045	0.0445509
[truncated: 4,453 more rows]
