# Supplementary material for: CRISPR/Cas9 model of prostate cancer identifies Kmt2c deficiency as a metastatic driver by Odam/Cabs1 gene cluster expression
Source: Research Square preprint supplement (doi:10.21203/rs.3.rs-3013972/v1), 2024-01-15
Supplement: Supplementary file 16 [file Supplemetary Table 6.xlsx]

## Sheet: gsea.sig.hallmark
Supplementary Table 6: GSEA analysis for 50 cancer-related hallmarks from molecular signature database
	Normalized enrichment score			FDR
HALLMARK_MSigDB	5g	8g	lung	5g	8g	lung
E2F_TARGETS	2.53754	2.87833	3.59297	0	0	0
G2M_CHECKPOINT	2.38265	2.77217	3.26997	0	0	0
ALLOGRAFT_REJECTION	2.59895	2.69162	2.55205	0	0	0
INTERFERON_GAMMA_RESPONSE	2.43914	2.6305	2.71822	0	0	0
INTERFERON_ALPHA_RESPONSE	2.32647	2.58359	2.80309	0	0	0
INFLAMMATORY_RESPONSE	2.50461	2.47031	2.35516	0	0	0
TNFA_SIGNALING_VIA_NFKB	2.35517	2.30302	2.61082	0	3.61076e-06	0
MYC_TARGETS_V1	1.78543	2.36535	2.81002	0.00586254	0	0
IL6_JAK_STAT3_SIGNALING	2.41436	2.24037	2.29204	0	1.70341e-05	6.92031e-06
EPITHELIAL_MESENCHYMAL_TRANSITION	2.54895	2.70947	1.51362	0	0	0.0559594
MITOTIC_SPINDLE	2.00399	2.16771	2.4493	0.000359255	6.15691e-05	0
TGF_BETA_SIGNALING	1.91219	1.88444	2.48419	0.00135815	0.00299271	0
COMPLEMENT	2.05405	2.09593	2.00169	0.000155844	0.000173319	0.000854654
IL2_STAT5_SIGNALING	2.01021	2.03544	1.93536	0.000319423	0.000477104	0.00190685
HYPOXIA	1.83249	2.07176	2.00717	0.00356072	0.000267766	0.000792496
APICAL_JUNCTION	2.01012	1.94939	1.58523	0.000320036	0.00143033	0.0362011
COAGULATION	1.96793	1.98136	1.4831	0.000623886	0.000962196	0.0662323
MTORC1_SIGNALING	1.40493	1.80069	2.09109	0.10049	0.00667286	0.000235366
P53_PATHWAY	1.72513	1.49269	1.89492	0.0104288	0.0618996	0.00291239
KRAS_SIGNALING_UP	1.92195	1.70182	1.41967	0.00115493	0.015208	0.0922962
APOPTOSIS	1.82789	1.54905	1.63959	0.00374588	0.0438264	0.0251946
GLYCOLYSIS	1.387	1.74859	1.85938	0.110791	0.010529	0.00417267
PI3K_AKT_MTOR_SIGNALING	1.46623	1.52784	1.95831	0.0700095	0.0499286	0.00147778
CHOLESTEROL_HOMEOSTASIS	1.41898	1.46959	1.64628	0.0929707	0.0704	0.0240279
MYC_TARGETS_V2	1.03402	1.62184	1.81324	0.547063	0.0268747	0.00647417
DNA_REPAIR	1.18453	1.4653	1.78526	0.306591	0.0718578	0.00826302
ANGIOGENESIS	1.69047	1.69254	0.817954	0.0142993	0.0162865	0.877261
FATTY_ACID_METABOLISM	-1.74098	-1.86356	-1.47342	0.0769981	0.0265813	0.158593
MYOGENESIS	-1.61225	-1.77355	-2.02528	0.129937	0.0451087	0.00582049
BILE_ACID_METABOLISM	-1.8976	-2.0631	-1.71172	0.0317426	0.00508661	0.0546603
